# Supplementary material for: Dissecting the Shared and Context-Dependent Pathways Mediated by the p140Cap Adaptor Protein in Cancer and in Neurons
Source: Front Cell Dev Biol. 2019 Oct 15;7:222. doi: 10.3389/fcell.2019.00222 (PMC6803390; doi:10.3389/fcell.2019.00222)
Supplement: TABLE S5 — Bridgeness values for cancer and synaptic p140Cap networks. [file Table_5.XLSX]

## Sheet: Legend
Functional Enrichment of Candidate Bridging Proteins in P140Cap synaptic and Cancer PPI networks
For each network, P140Cap_syn_PPI (N: 201, E: 458) and P140Cap_Cancer_PPI (N: 348, E: 1630), we preformed the following steps.
Clustering
(1) We used the consensus of 4 clustering algorithms to calculate the candidate Bridging proteins:
Algorithm	Name	Parameter(s)	Value(s)	Description
Spectral Modularity	Spectral	Modularity (Q)		Divisive hierarchical clustering based spectral network properties (and fine-tuning) and maximising the Modularity (Mclean, C et al 2016; Newman, M. 2006)
		edge weighting	unweighted
SpinGlass	sgG1			Divisive hierarchical (and partitional) clustering based on a spin-glass and simulated annealing model using Modularity (Csardi et al., 2006; Reichardt, J. Bornholdt, S. 2006; Traag, V. Bruggeman, J. 2008)
		Modularity (Q)
		Gamma	1	Optimised for Modularity maximisation when Gamma is 1. Increasing gamma tends to favour more edges between communities, and lower the Modularity values.
		Spin	500	No: of possible communities (set large)
		start.temp	1	Start temperature to use for the simulated annealing method
		stop.temp	0.01	Stop temperature, the clustering terminates if temperature is lower than this value.
		cool.fact	0.99	Cooling factor for the simulated annealing algorithm (Traag, V. Bruggeman, J. 2008).
		implementation	original	Implementation as given in (Traag, V. Bruggeman, J. 2008), without use of negative weights.
		edge weighting	unweighted
Infomap	infomap			Employs a random walk to analysis information flow in the network and the clustering (Rosvall et al, 2007)
		Minimum Description Length
SVI	SVI			Bayesian based inference Mixed-Membership Stochastic Blockmodel (MMSBM) (Gopalan, P. & Blei, D, 2013).
		Sampling method		Link-based sampling
		K		The number of communities needs to be specified, which is achieved through algorithms internal inference method.
Candidate Bridging proteins
(2) For each algorithm we calculated each proteins Bridgness “Br” (Nepusz, T. et al 2008) score and its Semi-local “Cl” centrality (Chen, D et al (2011) value.
For the 3 concrete clustering algorithms, Spectral, sgG1 and infomap, a consensus based clustering approach (Monti et al,, 2003; Simpson et al., 2010; Mclean, C et al, 2016) was used.
The average Bridging scores, across the 4 algorithms, was used in the classification of proteins.
(3) Using the Consensus Bridging score Br^CON [0,1] and normalised Semi-local centrality Clnorm [0,1], we classified proteins into 4 Regions.
Region 1	0.5 < Br^CON <= 1 && 0 <= Clnorm < 0.5
Region 2	0.5 < Br^CON <= 0.5 && 0.5 < Clnorm <= 1
Region 3	0.1 <= Br^CON <= 0.5 && 0 <= Clnorm <= 0.5
Region 4	0 <= Br^CON < 0.5 && 0.5 < Clnorm <= 1
A break-down of the candidate Bridging proteins in each Region is given in “P140Cap_syn_PPI_Bridging_proteins” and “P140Cap_Cancer_PPI_Bridging_Proteins” for the P140Cap synaptic and Cancer PPI networks.
Core Synaptic Proteins: 78 genes idenified playing important roles in presynaptic sub-processes (Chua, J et al; SynSys), and core PSD95/DLG4 interactors (Fernandez, E & Grant, 2017).
	P140Cap_syn_PPI		P140Cap_Cancer_PPI
	N:	Core Synaptic Proetins	N:	Core Synaptic Proteins
Region1	1	0	35	6
Region2	1	0	3	0
Region3	77	19	216	13
Region4	6	1	4	0
Functional Enrichment of Candidate Bridging Proteins
(4) We calculated the statistical sigificance ('p-value') of annotated proteins in each region using the Hypergoemetric Test, and the overlap between annotations in each region
using the two-sided Fisher test (Pocklington, A. et al 2006). Each p-value, calcuated in each region and in each network (i.e. each sheet), was corrected for ('p.adjust') using the BY procedure (Benjamini, Y. and Yekutieli, D. 2001).
Annotations
Human Disease Ontology (HDO) terms
Gene-disease enrichment values were calculated using the topOnto package (https://github.com/statbio/topOnto).
Using combined OMIM/geneRIF/Ensembl variation annotation data, together with the full HDO ontology tree “HDO tree”, (Geifman et al., 2010)
Human GO Biological Process (BP) terms
GO BP enrichment values were calculated using the topGO package (http://topgo.bioinf.mpi-inf.mpg.de/) with annotation data from Biocondu
with annotation data from Bioconductor Genome wide annotation package (Carlson M (2016). org.Hs.eg.db: Geneome wide annotation for Human. R package version 3.2.3).
Selected HDO's terms								Selected GO BP terms
HDO ID	Disease Name	HDO Short Name	Parent HDO term	Disease/Cancer Grouping				GO.ID	Term	Annotated	Significant	Expected	classicFisher	elimFisher	Bonferroni for classicFisher	Bonferroni for elimFisher	BY for classicFisher	BY for elimFisher
DOID:10652	Alzheimer's Disease	AD	CNSdis	dis				GO:0007411	axon guidance	563	102	17.7	1e-30	1e-30	***	***	2.95871e-27	1.61086e-26
DOID:14330	Parkingson's Disease	PD	CNSdis	dis				GO:0048010	vascular endothelial growth factor recep...	296	69	9.31	1e-30	1e-30	***	***	2.95871e-27	1.61086e-26
DOID:12858	Huntington's Disease	HD	CNSdis	dis				GO:0000186	activation of MAPKK activity	237	60	7.45	1e-30	1e-30	***	***	2.95871e-27	1.61086e-26
DOID:1826	Epilepsy Syndrome	Epi	CNSdis	dis				GO:0007265	Ras protein signal transduction	537	83	16.89	1e-30	1e-30	***	***	2.95871e-27	1.61086e-26
DOID:3312	Bipolar Disorder	BI	Mhdis	dis				GO:0048011	neurotrophin TRK receptor signaling path...	401	71	12.61	1e-30	1e-30	***	***	2.95871e-27	1.61086e-26
DOID:12849	Autistic Disorder	AUT	Mhdis	dis				GO:0038095	Fc-epsilon receptor signaling pathway	315	62	9.91	1e-30	1e-30	***	***	2.95871e-27	1.61086e-26
DOID:5419	Schizophrenia	SCH	Mhdis	dis				GO:0008286	insulin receptor signaling pathway	332	63	10.44	1e-30	1e-30	***	***	2.95871e-27	1.61086e-26
DOID:0060041	Autistic Spectrum Disorder	ASD	Mhdis	dis				GO:0008543	fibroblast growth factor receptor signal...	311	61	9.78	1e-30	1e-30	***	***	2.95871e-27	1.61086e-26
DOID:1059	Intellectual Disability	ID	Mhdis	dis				GO:0006977	DNA damage response, signal transduction...	66	32	2.08	1e-30	1e-30	***	***	2.95871e-27	1.61086e-26
DOID:9255	Frontotemporal Dementia	FTD	Mhdis	dis				GO:0051437	positive regulation of ubiquitin-protein...	72	32	2.26	2.9e-29	2.9e-29	***	***	5.75936e-26	4.20433e-25
DOID:769	NeuroBlastoma	NB	CNScan	can				GO:0002223	stimulatory C-type lectin receptor signa...	121	39	3.81	4.8e-29	4.8e-29	***	***	9.27853e-26	6.32627e-25
DOID:2621	Autonomic_Nervous_System_Neoplasm	ANSN	CNScan	can				GO:0002479	antigen processing and presentation of e...	75	31	2.36	3.5e-27	3.5e-27	***	***	5.57604e-24	4.2285e-23
DOID:1192	Peripheral_Nervous_System_Neoplasm	PNSN	CNScan	can				GO:0007173	epidermal growth factor receptor signali...	362	66	11.38	1e-30	1.3e-26	***	***	2.95871e-27	1.44977e-22
DOID:3093	Nervous_System_Cancer	NSC	CNScan	can				GO:0038061	NIK/NF-kappaB signaling	101	33	3.18	5.8e-25	5.8e-25	***	***	7.00722e-22	6.00619e-21
DOID:3620	Central_Nervous_System_Cancer	CNSC	CNScan	can				GO:0006521	regulation of cellular amino acid metabo...	64	27	2.01	4e-24	4e-24	***	***	4.42678e-21	3.86605e-20
DOID:3070	Malignant_Glioma	MG	CNScan	can				GO:0090090	negative regulation of canonical Wnt sig...	151	38	4.75	5.9e-24	5.9e-24	***	***	6.43131e-21	5.34603e-20
DOID:10534	Stomach_Cancer	SC	GIScan	can				GO:0051436	negative regulation of ubiquitin-protein...	90	30	2.83	4.3e-23	4.3e-23	***	***	4.26987e-20	3.66707e-19
DOID:3119	Gastrointestinal_System_Cancer	GISC	GIScan	can				GO:0031145	anaphase-promoting complex-dependent pro...	116	33	3.65	8.5e-23	8.5e-23	***	***	8.21536e-20	6.84614e-19
DOID:5517	Stomach_Carcinoma	SCA	GIScan	can				GO:0090263	positive regulation of canonical Wnt sig...	131	34	4.12	5e-22	5e-22	***	***	4.4746e-19	3.81518e-18
DOID:3717	Gastric_Adenocarcinoma	GAC	GIScan	can				GO:0016032	viral process	769	87	24.18	4.6e-26	4.6e-21	***	***	6.7363e-23	3.33447e-17
DOID:10540	Gastric_Lymphoma	GLC	GIScan	can				GO:0033209	tumor necrosis factor-mediated signaling...	139	33	4.37	4.2e-20	4.2e-20	***	***	2.91341e-17	2.89954e-16
DOID:6270	Gastric_Cardia_Carcinoma	GCCA	GIScan	can				GO:0048013	ephrin receptor signaling pathway	92	26	2.89	3.8e-18	3.8e-18	***	***	2.18616e-15	2.50415e-14
DOID:1612	Breast_Cancer	BC	can	can				GO:0000209	protein polyubiquitination	212	34	6.67	4.1e-15	4.1e-15	***	***	1.95528e-12	2.58437e-11
DOID:1909	Melanoma	MEL	can	can				GO:0010499	proteasomal ubiquitin-independent protei...	22	12	0.69	4e-13	4e-13	***	***	1.68578e-10	2.41628e-09
DOID:684	Hepatocellular_Carcinoma	HCC	can	can				GO:0043066	negative regulation of apoptotic process	822	66	25.85	1.9e-12	1.9e-12	***	***	7.60929e-10	1.10183e-08
DOID:1749	Squamous_Cell_Carcinoma	SCC	can	can				GO:0034332	adherens junction organization	116	25	3.65	1.8e-14	1.6e-11	***	***	8.15496e-12	8.92166e-08
DOID:219	Colon_Cancer	HCNC	can	can				GO:0038096	Fc-gamma receptor signaling pathway invo...	94	19	2.96	8.3e-11	8.3e-11	***	***	3.02339e-08	4.4567e-07
DOID:3328	Temporal_Lobe_Epilepsy	TLE	dis	dis				GO:0051084	'de novo' posttranslational protein fold...	47	14	1.48	1e-10	1e-10	***	***	3.61539e-08	5.17775e-07
DOID:2234	Focal_Epilepsy	Fepi	dis	dis				GO:0000184	nuclear-transcribed mRNA catabolic proce...	120	21	3.77	1.5e-10	1.5e-10	***	***	5.38281e-08	7.49881e-07
								GO:1901998	toxin transport	40	12	1.26	2.1e-09	2.1e-09	***	***	7.03122e-07	1.01484e-05
								GO:0030168	platelet activation	249	31	7.83	6.3e-11	2.6e-09	***	***	2.31229e-08	1.21594e-05
								GO:0007264	small GTPase mediated signal transductio...	917	120	28.84	1e-30	3.5e-09	***	***	2.95871e-27	1.58569e-05
								GO:0006614	SRP-dependent cotranslational protein ta...	108	18	3.4	6.8e-09	6.8e-09	***	***	2.19076e-06	2.9874e-05
								GO:0021762	substantia nigra development	46	12	1.45	1.2e-08	1.2e-08	***	***	3.82357e-06	5.11683e-05
								GO:0007268	synaptic transmission	719	78	22.61	3.3e-22	4.2e-08	***	***	3.04729e-19	0.000173167
								GO:0046710	GDP metabolic process	13	7	0.41	4.3e-08	4.3e-08	***	***	1.31797e-05	0.000173167
								GO:0051693	actin filament capping	34	13	1.07	1.3e-11	4.7e-08	***	***	4.98598e-09	0.00018416
								GO:2000463	positive regulation of excitatory postsy...	19	8	0.6	5e-08	5e-08	***	***	1.52287e-05	0.000190759
								GO:0071625	vocalization behavior	14	7	0.44	8.3e-08	8.3e-08	**	**	2.47594e-05	0.000308541
								GO:0034329	cell junction assembly	226	38	7.11	1.8e-17	9.2e-08	***	**	9.84749e-15	0.000333447
								GO:0050885	neuromuscular process controlling balanc...	55	12	1.73	1.1e-07	1.1e-07	**	**	3.24796e-05	0.000388963
								GO:0045899	positive regulation of RNA polymerase II...	11	6	0.35	3.8e-07	3.8e-07	**	**	0.00010739	0.0013117
								GO:0097193	intrinsic apoptotic signaling pathway	290	27	9.12	5.1e-07	5.1e-07	**	**	0.000142738	0.00171949
								GO:0042059	negative regulation of epidermal growth ...	43	10	1.35	6.5e-07	6.5e-07	**	**	0.000180182	0.00214171
								GO:0046037	GMP metabolic process	19	7	0.6	1.1e-06	1.1e-06	*	*	0.000298084	0.00354388
								GO:0006413	translational initiation	267	25	8.4	1.2e-06	1.2e-06	*	*	0.000323369	0.00378201
								GO:0035176	social behavior	46	10	1.45	1.3e-06	1.3e-06	*	*	0.000347731	0.00401
								GO:0051017	actin filament bundle assembly	114	20	3.58	3.8e-10	1.4e-06	***	*	1.33393e-07	0.0042285
								GO:0007269	neurotransmitter secretion	155	18	4.87	1.9e-06	1.9e-06	*	*	0.00050083	0.00562156
								GO:0000086	G2/M transition of mitotic cell cycle	188	20	5.91	2e-06	2e-06	*	*	0.000526232	0.00579908
								GO:0048167	regulation of synaptic plasticity	135	26	4.25	8.9e-14	2.1e-06	***	*	3.86316e-11	0.00596964
								GO:0007416	synapse assembly	127	20	3.99	2.8e-09	2.4e-06	***	*	9.24682e-07	0.00669125
								GO:0045087	innate immune response	1112	98	34.97	3.9e-21	2.6e-06	***	*	3.07288e-18	0.00711208

## Sheet: P140Cap_syn_PPI_Bridging_Protei
Region1											Region2											Region3											Region4
GENE.ID	ALGS	N.ALGS	pre	psd	dis	dis2	dis3	sch	go	GeneName	GENE.ID	ALGS	N.ALGS	pre	psd	dis	dis2	dis3	sch	go	GeneName	GENE.ID	ALGS	N.ALGS	pre	psd	dis	dis2	dis3	sch	go	GeneName	GENE.ID	ALGS	N.ALGS	pre	psd	dis	dis2	dis3	sch	go	GeneName
55914	CONSENSUS	1			BC&GISC	GIScan	can	CAT_signaling	epidermal_growth_factor_receptor_signali...&innate_immune_response	ERBB2IP	6709	CONSENSUS	1			Epi&GISC&ID&SCH	CNSdis&GIScan&MHdis	disANDcan	Structural_plasticity	axon_guidance&small_GTPase_mediated_signal_transductio...&vascular_endothelial_growth_factor_recep...&activation_of_MAPKK_activity&Ras_protein_signal_transduction&neurotrophin_TRK_receptor_signaling_path...&Fc-epsilon_receptor_signaling_pathway&epidermal_growth_factor_receptor_signali...&insulin_receptor_signaling_pathway&fibroblast_growth_factor_receptor_signal...&innate_immune_response&actin_fi…	SPTAN1	1000	CONSENSUS	1			AD&BI&BC&HCNC&GISC&HCC&MG&MEL&SCC	CNSdis&MHdis&GIScan&CNScan	disANDcan	CAT_signaling	small_GTPase_mediated_signal_transductio...&Ras_protein_signal_transduction&negative_regulation_of_canonical_Wnt_sig...&cell_junction_assembly&adherens_junction_organization&synapse_assembly	CDH2	10097	CONSENSUS	1			GISC	GIScan	can	Structural_plasticity	axon_guidance&small_GTPase_mediated_signal_transductio...&innate_immune_response&ephrin_receptor_signaling_pathway&Fc-gamma_receptor_signaling_pathway_invo...	ACTR2
																						10458	CONSENSUS	1		YES	ASD&AUT	MHdis	dis	Intracellular_Signal_Transduction	small_GTPase_mediated_signal_transductio...&vascular_endothelial_growth_factor_recep...&insulin_receptor_signaling_pathway&synaptic_transmission&innate_immune_response&regulation_of_synaptic_plasticity&Fc-gamma_receptor_signaling_pathway_invo...&actin_filament_bundle_assembly	BAIAP2	11346	CONSENSUS	1			HTN&ID&SCH	MHdis	dis		actin_filament_bundle_assembly	SYNPO
																						118	CONSENSUS	1			GISC&HTN&SC	GIScan	can	Structural_plasticity	actin_filament_capping&actin_filament_bundle_assembly	ADD1	1627	CONSENSUS	1			AD&HCNC&GISC&MG	CNSdis&GIScan&CNScan	disANDcan	Structural_plasticity	synaptic_transmission&regulation_of_synaptic_plasticity	DBN1
																						119	CONSENSUS	1			HTN			Structural_plasticity	actin_filament_capping&actin_filament_bundle_assembly	ADD2	399687	CONSENSUS	1							negative_regulation_of_apoptotic_process	MYO18A
																						120	CONSENSUS	1			ID&MG&NSC&PNSN	MHdis&CNScan	disANDcan	Structural_plasticity		ADD3	5499	CONSENSUS	1			GISC&NSC&SCC	GIScan&CNScan	can		translational_initiation	PPP1CA
																						1499	CONSENSUS	1	YES		AD&ASD&AUT&ANSN&BI&BC&CNSC&HCNC&FTD&GAC&GISC&HCC&HTN&ID&MG&MEL&NSC&NB&PNSN&SCH&SCC&SC&SCA	CNSdis&MHdis&CNScan&GIScan	disANDcan	Intracellular_Signal_Transduction	small_GTPase_mediated_signal_transductio...&fibroblast_growth_factor_receptor_signal...&synaptic_transmission&positive_regulation_of_canonical_Wnt_sig...&innate_immune_response&cell_junction_assembly&adherens_junction_organization&negative_regulation_of_apoptotic_process	CTNNB1	830	CONSENSUS	1		YES	GISC&HCC	GIScan	can	Structural_plasticity	innate_immune_response&actin_filament_capping	CAPZA2
																						1500	CONSENSUS	1	YES		ASD&AUT&BC&GISC&HCC&MEL&SCC	MHdis&GIScan	disANDcan	Intracellular_Signal_Transduction	vascular_endothelial_growth_factor_recep...&negative_regulation_of_canonical_Wnt_sig...&cell_junction_assembly&adherens_junction_organization	CTNND1
																						1540	CONSENSUS	1			ANSN&BC&HCNC&GISC&HCC&MEL&NSC&NB&PD&PNSN	CNScan&GIScan&CNSdis	disANDcan		negative_regulation_of_canonical_Wnt_sig...&innate_immune_response&intrinsic_apoptotic_signaling_pathway	CYLD
																						1740	CONSENSUS	1		YES	Epi&FEpi&PD&TLE	CNSdis	dis	Protein_cluster	synaptic_transmission&GDP_metabolic_process&GMP_metabolic_process	DLG2
																						1741	CONSENSUS	1		YES	ID&SCH	MHdis	dis	Protein_cluster	axon_guidance&synaptic_transmission&GDP_metabolic_process&GMP_metabolic_process	DLG3
																						1742	CONSENSUS	1		YES	AD&PD&SCH	CNSdis&MHdis	dis	Protein_cluster	axon_guidance&small_GTPase_mediated_signal_transductio...&vascular_endothelial_growth_factor_recep...&activation_of_MAPKK_activity&Ras_protein_signal_transduction&neurotrophin_TRK_receptor_signaling_path...&Fc-epsilon_receptor_signaling_pathway&epidermal_growth_factor_receptor_signali...&insulin_receptor_signaling_pathway&fibroblast_growth_factor_receptor_signal...&synaptic_transmission&innate_im…	DLG4
																						2043	CONSENSUS	1			BC&GISC	GIScan	can	Tyrosine_kinase_signaling	axon_guidance&ephrin_receptor_signaling_pathway	EPHA4
																						22941	CONSENSUS	1			ASD&AUT&ID	MHdis	dis	Protein_cluster	synaptic_transmission&regulation_of_synaptic_plasticity&synapse_assembly&vocalization_behavior&social_behavior	SHANK2
																						22999	CONSENSUS	1	YES		SCH	MHdis	dis	Exocytosis	synaptic_transmission&regulation_of_synaptic_plasticity&positive_regulation_of_excitatory_postsy...&neurotransmitter_secretion	RIMS1
																						23043	CONSENSUS	1			GISC&HCC&SCH	GIScan&MHdis	disANDcan		activation_of_MAPKK_activity	TNIK
																						2314	CONSENSUS	1								FLII
																						23426	CONSENSUS	1			ASD&AUT&BI&SCH	MHdis	dis		synaptic_transmission	GRIP1
																						23499	CONSENSUS	1			SCH	MHdis	dis	Structural_plasticity	cell_junction_assembly&adherens_junction_organization	MACF1
																						2534	CONSENSUS	1			AD&ANSN&BI&BC&MEL&NSC&NB&PNSN&SCH	CNSdis&CNScan&MHdis	disANDcan		axon_guidance&small_GTPase_mediated_signal_transductio...&vascular_endothelial_growth_factor_recep...&activation_of_MAPKK_activity&Ras_protein_signal_transduction&neurotrophin_TRK_receptor_signaling_path...&Fc-epsilon_receptor_signaling_pathway&epidermal_growth_factor_receptor_signali...&insulin_receptor_signaling_pathway&fibroblast_growth_factor_receptor_signal...&stimulatory_C-type_lectin_recep…	FYN
																						25822	CONSENSUS	1								DNAJB5
																						26037	CONSENSUS	1			AD&SCH	CNSdis&MHdis	dis		small_GTPase_mediated_signal_transductio...&synaptic_transmission&ephrin_receptor_signaling_pathway&regulation_of_synaptic_plasticity	SIPA1L1
																						2890	CONSENSUS	1		YES	AD&BI&CNSC&Epi&FEpi&MG&NSC&SCH&TLE	CNSdis&MHdis&CNScan	disANDcan	LGIC_signaling	synaptic_transmission&regulation_of_synaptic_plasticity	GRIA1
																						28964	CONSENSUS	1	YES		BC&GISC&HD&SCC	GIScan&CNSdis	disANDcan	Endocytosis	axon_guidance&ephrin_receptor_signaling_pathway	GIT1
																						2902	CONSENSUS	1		YES	AD&BI&BC&Epi&FEpi&ID&SCH&TLE	CNSdis&MHdis	dis	LGIC_signaling	axon_guidance&small_GTPase_mediated_signal_transductio...&vascular_endothelial_growth_factor_recep...&activation_of_MAPKK_activity&Ras_protein_signal_transduction&neurotrophin_TRK_receptor_signaling_path...&Fc-epsilon_receptor_signaling_pathway&epidermal_growth_factor_receptor_signali...&insulin_receptor_signaling_pathway&fibroblast_growth_factor_receptor_signal...&synaptic_transmission&innate_im…	GRIN1
																						2903	CONSENSUS	1		YES	AD&ASD&AUT&BI&Epi&FEpi&HD&ID&MEL&PD&SCH	CNSdis&MHdis	dis	LGIC_signaling	axon_guidance&small_GTPase_mediated_signal_transductio...&vascular_endothelial_growth_factor_recep...&activation_of_MAPKK_activity&Ras_protein_signal_transduction&neurotrophin_TRK_receptor_signaling_path...&Fc-epsilon_receptor_signaling_pathway&epidermal_growth_factor_receptor_signali...&insulin_receptor_signaling_pathway&fibroblast_growth_factor_receptor_signal...&synaptic_transmission&innate_im…	GRIN2A
																						2904	CONSENSUS	1		YES	AD&ASD&AUT&BI&BC&Epi&FEpi&GISC&HD&ID&PD&SCH&SCC&TLE	CNSdis&MHdis&GIScan	disANDcan	LGIC_signaling	axon_guidance&small_GTPase_mediated_signal_transductio...&vascular_endothelial_growth_factor_recep...&activation_of_MAPKK_activity&Ras_protein_signal_transduction&neurotrophin_TRK_receptor_signaling_path...&Fc-epsilon_receptor_signaling_pathway&epidermal_growth_factor_receptor_signali...&insulin_receptor_signaling_pathway&fibroblast_growth_factor_receptor_signal...&synaptic_transmission&innate_im…	GRIN2B
																						2977	CONSENSUS	1			SCH	MHdis	dis	Intracellular_Signal_Transduction		GUCY1A2
																						30011	CONSENSUS	1			BC&GISC&SCC	GIScan	can		epidermal_growth_factor_receptor_signali...&negative_regulation_of_epidermal_growth_...	SH3KBP1
																						3983	CONSENSUS	1		YES				Structural_plasticity	axon_guidance	ABLIM1
																						4131	CONSENSUS	1						Structural_plasticity		MAP1B
																						4301	CONSENSUS	1			BC&HCNC&GISC&PD	GIScan&CNSdis	disANDcan		cell_junction_assembly&adherens_junction_organization	MLLT4
																						4644	CONSENSUS	1						Intracellular_trafficking	synaptic_transmission	MYO5A
																						4646	CONSENSUS	1			HTN				synaptic_transmission&regulation_of_synaptic_plasticity&synapse_assembly	MYO6
																						4673	CONSENSUS	1								NAP1L1
																						4741	CONSENSUS	1			AD&SCH	CNSdis&MHdis	dis	Structural_plasticity		NEFM
																						50944	CONSENSUS	1			ID&SCH	MHdis	dis		synaptic_transmission&actin_filament_bundle_assembly&positive_regulation_of_excitatory_postsy...&vocalization_behavior&neuromuscular_process_controlling_balanc...&social_behavior	SHANK1
																						5127	CONSENSUS	1			ANSN&CNSC&NSC&NB&PNSN	CNScan	can			CDK16
																						51517	CONSENSUS	1						Intracellular_Signal_Transduction	small_GTPase_mediated_signal_transductio...&innate_immune_response&Fc-gamma_receptor_signaling_pathway_invo...	NCKIPSD
																						5339	CONSENSUS	1			GISC&HCC&SCH&SCC	GIScan&MHdis	disANDcan	Structural_plasticity	cell_junction_assembly	PLEC
																						54413	CONSENSUS	1			ASD&AUT&BI&ID	MHdis	dis	CAT_signaling	synaptic_transmission&regulation_of_synaptic_plasticity&synapse_assembly&positive_regulation_of_excitatory_postsy...&vocalization_behavior&social_behavior	NLGN3
																						54477	CONSENSUS	1								PLEKHA5
																						5501	CONSENSUS	1							small_GTPase_mediated_signal_transductio...	PPP1CC
																						55607	CONSENSUS	1								PPP1R9A
																						55740	CONSENSUS	1			BC&GISC&HCC&SCH	GIScan&MHdis	disANDcan		axon_guidance	ENAH
																						60	CONSENSUS	1			BC&HCNC&GISC&PD&SCH	GIScan&CNSdis&MHdis	disANDcan	Structural_plasticity	axon_guidance&small_GTPase_mediated_signal_transductio...&vascular_endothelial_growth_factor_recep...&innate_immune_response&ephrin_receptor_signaling_pathway&cell_junction_assembly&adherens_junction_organization&platelet_activation&Fc-gamma_receptor_signaling_pathway_invo...&'de_novo'_posttranslational_protein_fold...&substantia_nigra_development	ACTB
																						613	CONSENSUS	1			CNSC&NSC	CNScan	can		small_GTPase_mediated_signal_transductio...&Ras_protein_signal_transduction&neuromuscular_process_controlling_balanc...	BCR
																						65059	CONSENSUS	1								RAPH1
																						667	CONSENSUS	1			MEL				cell_junction_assembly	DST
																						6708	CONSENSUS	1							axon_guidance&small_GTPase_mediated_signal_transductio...&vascular_endothelial_growth_factor_recep...&activation_of_MAPKK_activity&Ras_protein_signal_transduction&neurotrophin_TRK_receptor_signaling_path...&Fc-epsilon_receptor_signaling_pathway&epidermal_growth_factor_receptor_signali...&insulin_receptor_signaling_pathway&fibroblast_growth_factor_receptor_signal...&innate_immune_response&actin_fi…	SPTA1
																						6711	CONSENSUS	1		YES	GISC&HCC	GIScan	can	Structural_plasticity	axon_guidance&small_GTPase_mediated_signal_transductio...&vascular_endothelial_growth_factor_recep...&activation_of_MAPKK_activity&Ras_protein_signal_transduction&neurotrophin_TRK_receptor_signaling_path...&Fc-epsilon_receptor_signaling_pathway&epidermal_growth_factor_receptor_signali...&insulin_receptor_signaling_pathway&fibroblast_growth_factor_receptor_signal...&innate_immune_response&actin_fi…	SPTBN1
																						7111	CONSENSUS	1							actin_filament_capping	TMOD1
																						7187	CONSENSUS	1			GISC&SCH	GIScan&MHdis	disANDcan		innate_immune_response&tumor_necrosis_factor-mediated_signaling...	TRAF3
																						773	CONSENSUS	1			Epi&ID	CNSdis&MHdis	dis	Excitability	synaptic_transmission&negative_regulation_of_apoptotic_process&synapse_assembly&neuromuscular_process_controlling_balanc...&neurotransmitter_secretion	CACNA1A
																						7917	CONSENSUS	1			HTN&SCH	MHdis	dis		negative_regulation_of_apoptotic_process&intrinsic_apoptotic_signaling_pathway	BAG6
																						815	CONSENSUS	1		YES	AD&FTD&GISC&SCH&SCC	CNSdis&GIScan&MHdis	disANDcan	Intracellular_Signal_Transduction	axon_guidance&small_GTPase_mediated_signal_transductio...&vascular_endothelial_growth_factor_recep...&activation_of_MAPKK_activity&Ras_protein_signal_transduction&neurotrophin_TRK_receptor_signaling_path...&Fc-epsilon_receptor_signaling_pathway&epidermal_growth_factor_receptor_signali...&insulin_receptor_signaling_pathway&fibroblast_growth_factor_receptor_signal...&synaptic_transmission&innate_im…	CAMK2A
																						81	CONSENSUS	1			BC&GISC&MG&MEL&SCC	GIScan&CNScan	can		NIK/NF-kappaB_signaling&cell_junction_assembly&platelet_activation&actin_filament_bundle_assembly	ACTN4
																						829	CONSENSUS	1			HTN&MEL				innate_immune_response&actin_filament_capping	CAPZA1
																						83992	CONSENSUS	1								CTTNBP2
																						8440	CONSENSUS	1			AD&MEL	CNSdis	dis		axon_guidance&vascular_endothelial_growth_factor_recep...&epidermal_growth_factor_receptor_signali...&ephrin_receptor_signaling_pathway&intrinsic_apoptotic_signaling_pathway&translational_initiation	NCK2
																						8470	CONSENSUS	1			AD	CNSdis	dis			SORBS2
																						85358	CONSENSUS	1			ASD&AUT&ID&SCH	MHdis	dis	Protein_cluster	synaptic_transmission&regulation_of_synaptic_plasticity&actin_filament_bundle_assembly&synapse_assembly&positive_regulation_of_excitatory_postsy...&vocalization_behavior&social_behavior	SHANK3
																						8573	CONSENSUS	1	YES		Epi&ID	CNSdis&MHdis	dis	Protein_cluster	synaptic_transmission&GDP_metabolic_process&GMP_metabolic_process&neurotransmitter_secretion	CASK
																						87	CONSENSUS	1			MG	CNScan	can	Structural_plasticity	cell_junction_assembly&adherens_junction_organization&platelet_activation&actin_filament_bundle_assembly	ACTN1
																						88	CONSENSUS	1			GISC	GIScan	can		axon_guidance&small_GTPase_mediated_signal_transductio...&vascular_endothelial_growth_factor_recep...&activation_of_MAPKK_activity&Ras_protein_signal_transduction&neurotrophin_TRK_receptor_signaling_path...&Fc-epsilon_receptor_signaling_pathway&epidermal_growth_factor_receptor_signali...&insulin_receptor_signaling_pathway&fibroblast_growth_factor_receptor_signal...&synaptic_transmission&innate_im…	ACTN2
																						9223	CONSENSUS	1			AD&BI&GISC&HCC&SCH	CNSdis&MHdis&GIScan	disANDcan			MAGI1
																						3728	CONSENSUS	1			BC&CNSC&GISC&HCC&MG&NSC&SCC	CNScan&GIScan	can		vascular_endothelial_growth_factor_recep...&positive_regulation_of_canonical_Wnt_sig...&cell_junction_assembly&adherens_junction_organization	JUP
																						57554	CONSENSUS	1			HTN			Protein_cluster		LRRC7
																						8502	CONSENSUS	1			SCH	MHdis	dis	CAT_signaling	cell_junction_assembly	PKP4
																						9657	CONSENSUS	1								IQCB1
																						9699	CONSENSUS	1			BC&SCH	MHdis	dis	Exocytosis	synaptic_transmission&positive_regulation_of_excitatory_postsy...&neurotransmitter_secretion	RIMS2
																						84687	CONSENSUS	1			GISC&HCC&SCH&SCC	GIScan&MHdis	disANDcan	Intracellular_Signal_Transduction	synaptic_transmission	PPP1R9B
																						9456	CONSENSUS	1			AD&ASD&AUT&ANSN&GISC&ID&NSC&NB&PD&PNSN&SCH	CNSdis&MHdis&CNScan&GIScan	disANDcan	Intracellular_Signal_Transduction	synaptic_transmission	HOMER1
																						2892	CONSENSUS	1		YES	AD&Epi&FEpi&ID&SCH&TLE	CNSdis&MHdis	dis	LGIC_signaling	synaptic_transmission	GRIA3
																						8874	CONSENSUS	1	YES		BC&HCNC&GISC&MG	GIScan&CNScan	can		axon_guidance&small_GTPase_mediated_signal_transductio...&Ras_protein_signal_transduction&neurotrophin_TRK_receptor_signaling_path...&epidermal_growth_factor_receptor_signali...&ephrin_receptor_signaling_pathway&cell_junction_assembly&adherens_junction_organization&negative_regulation_of_epidermal_growth_...	ARHGEF7
																						287	CONSENSUS	1			SCH	MHdis	dis	Structural_plasticity	axon_guidance	ANK2
																						9378	CONSENSUS	1		YES	ASD&AUT&BC&Epi&ID&SCH	MHdis&CNSdis	dis	CAT_signaling	axon_guidance&synaptic_transmission&synapse_assembly&positive_regulation_of_excitatory_postsy...&vocalization_behavior&neuromuscular_process_controlling_balanc...&social_behavior&neurotransmitter_secretion	NRXN1
																						9743	CONSENSUS	1			SCH	MHdis	dis		small_GTPase_mediated_signal_transductio...	ARHGAP32

## Sheet: P140Cap_Cancer_PPI_Bridging_Pro
Region1											Region2											Region3											Region4
GENE.ID	ALGS	N.ALGS	pre	psd	dis	dis2	dis3	sch	go	GeneName	GENE.ID	ALGS	N.ALGS	pre	psd	dis	dis2	dis3	sch	go	GeneName	GENE.ID	ALGS	N.ALGS	pre	psd	dis	dis2	dis3	sch	go	GeneName	GENE.ID	ALGS	N.ALGS	pre	psd	dis	dis2	dis3	sch	go	GeneName
10627	CONSENSUS	1							axon_guidance&ephrin_receptor_signaling_pathway&platelet_activation	MYL12A	2885	CONSENSUS	1			BC&GISC&HCC&SCH&SCC	GIScan&MHdis	disANDcan	Intracellular_Signal_Transduction	axon_guidance&small_GTPase_mediated_signal_transductio...&vascular_endothelial_growth_factor_recep...&activation_of_MAPKK_activity&Ras_protein_signal_transduction&neurotrophin_TRK_receptor_signaling_path...&Fc-epsilon_receptor_signaling_pathway&epidermal_growth_factor_receptor_signali...&insulin_receptor_signaling_pathway&fibroblast_growth_factor_receptor_signal...&viral_process&innate_immune_res…	GRB2	10043	CONSENSUS	1								TOM1	5684	CONSENSUS	1							axon_guidance&small_GTPase_mediated_signal_transductio...&vascular_endothelial_growth_factor_recep...&activation_of_MAPKK_activity&Ras_protein_signal_transduction&neurotrophin_TRK_receptor_signaling_path...&Fc-epsilon_receptor_signaling_pathway&epidermal_growth_factor_receptor_signali...&insulin_receptor_signaling_pathway&fibroblast_growth_factor_receptor_signal...&DNA_damage_response,_signal_tra…	PSMA3
10971	CONSENSUS	1			BC&CNSC&HTN&NSC	CNScan	can	Intracellular_Signal_Transduction	small_GTPase_mediated_signal_transductio...&substantia_nigra_development&intrinsic_apoptotic_signaling_pathway	YWHAQ	3312	CONSENSUS	1			AD&BC&HCNC&GISC&MG&PD&SCH	CNSdis&GIScan&CNScan&MHdis	disANDcan	RPSFB	axon_guidance&viral_process&synaptic_transmission&'de_novo'_posttranslational_protein_fold...&neurotransmitter_secretion	HSPA8	10049	CONSENSUS	1			BC				negative_regulation_of_apoptotic_process	DNAJB6	8065	CONSENSUS	1			GISC&HCC	GIScan	can		viral_process&intrinsic_apoptotic_signaling_pathway	CUL5
1213	CONSENSUS	1		YES				Endocytosis		CLTC	7316	CONSENSUS	1			Epi	CNSdis	dis		axon_guidance&small_GTPase_mediated_signal_transductio...&vascular_endothelial_growth_factor_recep...&activation_of_MAPKK_activity&Ras_protein_signal_transduction&neurotrophin_TRK_receptor_signaling_path...&Fc-epsilon_receptor_signaling_pathway&epidermal_growth_factor_receptor_signali...&insulin_receptor_signaling_pathway&fibroblast_growth_factor_receptor_signal...&DNA_damage_response,_signal_tra…	UBC	10120	CONSENSUS	1			GISC&HCC	GIScan	can			ACTR1B	8453	CONSENSUS	1							viral_process&intrinsic_apoptotic_signaling_pathway	CUL2
1457	CONSENSUS	1	YES		BC&CNSC&GISC&MG&NSC&SCH&SCC&SC&SCA	CNScan&GIScan&MHdis	disANDcan	Intracellular_Signal_Transduction	axon_guidance&anaphase-promoting_complex-dependent_pro...&negative_regulation_of_apoptotic_process	CSNK2A1												10121	CONSENSUS	1			CNSC&NSC	CNScan	can		G2/M_transition_of_mitotic_cell_cycle	ACTR1A	8454	CONSENSUS	1			BC&HTN&MG&MEL	CNScan	can		Fc-epsilon_receptor_signaling_pathway&positive_regulation_of_ubiquitin-protein...&stimulatory_C-type_lectin_receptor_signa...&viral_process&NIK/NF-kappaB_signaling&anaphase-promoting_complex-dependent_pro...&innate_immune_response&tumor_necrosis_factor-mediated_signaling...&intrinsic_apoptotic_signaling_pathway&G2/M_transition_of_mitotic_cell_cycle	CUL1
1639	CONSENSUS	1						Intracellular_trafficking	G2/M_transition_of_mitotic_cell_cycle	DCTN1												10165	CONSENSUS	1			AD&FTD&GISC&HCC	CNSdis&GIScan	disANDcan			SLC25A13
1654	CONSENSUS	1			GISC&ID	GIScan&MHdis	disANDcan		viral_process&innate_immune_response&negative_regulation_of_apoptotic_process&intrinsic_apoptotic_signaling_pathway&translational_initiation	DDX3X												10211	CONSENSUS	1			AD&ANSN&BC&GISC&NSC&NB&PNSN&SCC	CNSdis&CNScan&GIScan	disANDcan	Unknown	small_GTPase_mediated_signal_transductio...&Ras_protein_signal_transduction&synaptic_transmission&innate_immune_response&cell_junction_assembly	FLOT1
1936	CONSENSUS	1			BC&CNSC&GISC&NSC	CNScan&GIScan	can			EEF1D												10213	CONSENSUS	1							axon_guidance&small_GTPase_mediated_signal_transductio...&vascular_endothelial_growth_factor_recep...&activation_of_MAPKK_activity&Ras_protein_signal_transduction&neurotrophin_TRK_receptor_signaling_path...&Fc-epsilon_receptor_signaling_pathway&epidermal_growth_factor_receptor_signali...&insulin_receptor_signaling_pathway&fibroblast_growth_factor_receptor_signal...&DNA_damage_response,_signal_tra…	PSMD14
23043	CONSENSUS	1			GISC&HCC&SCH	GIScan&MHdis	disANDcan		activation_of_MAPKK_activity	TNIK												10238	CONSENSUS	1								DCAF7
2547	CONSENSUS	1			ANSN&BC&HCNC&GISC&HCC&MG&MEL&NSC&NB&PNSN&SCC&SC&SCA	CNScan&GIScan	can		viral_process&innate_immune_response	XRCC6												10270	CONSENSUS	1								AKAP8
2597	CONSENSUS	1		YES	AD&BC&HCNC&GISC&HD&MG&MEL&SCH	CNSdis&GIScan&CNScan&MHdis	disANDcan	Cell_metabolism	innate_immune_response	GAPDH												10294	CONSENSUS	1								DNAJA2
3190	CONSENSUS	1			HCNC&GISC&HCC&MEL&SCH&SCC&SC&SCA	GIScan&MHdis	disANDcan		viral_process&negative_regulation_of_apoptotic_process	HNRNPK												10383	CONSENSUS	1			FTD&GISC	CNSdis&GIScan	disANDcan	Structural_plasticity	innate_immune_response&'de_novo'_posttranslational_protein_fold...&G2/M_transition_of_mitotic_cell_cycle	TUBB4B
3309	CONSENSUS	1			AD&ANSN&BI&BC&CNSC&HCNC&GISC&HCC&HTN&MG&MEL&NSC&NB&PNSN&SCH&SCC&SC&SCA	CNSdis&CNScan&MHdis&GIScan	disANDcan	RPSFB	negative_regulation_of_apoptotic_process&platelet_activation&toxin_transport&substantia_nigra_development	HSPA5												10432	CONSENSUS	1								RBM14
3376	CONSENSUS	1								IARS												10521	CONSENSUS	1			HCNC&GISC	GIScan	can			DDX17
3801	CONSENSUS	1			BC					KIFC3												10574	CONSENSUS	1						RPSFB	'de_novo'_posttranslational_protein_fold...&toxin_transport	CCT7
3845	CONSENSUS	1			BC&HCNC&GISC&HCC&MG&MEL&SCC&SC	GIScan&CNScan	can	Intracellular_Signal_Transduction	axon_guidance&small_GTPase_mediated_signal_transductio...&vascular_endothelial_growth_factor_recep...&activation_of_MAPKK_activity&Ras_protein_signal_transduction&neurotrophin_TRK_receptor_signaling_path...&Fc-epsilon_receptor_signaling_pathway&epidermal_growth_factor_receptor_signali...&insulin_receptor_signaling_pathway&fibroblast_growth_factor_receptor_signal...&stimulatory_C-type_lectin_recep…	KRAS												10575	CONSENSUS	1						RPSFB	'de_novo'_posttranslational_protein_fold...&toxin_transport	CCT4
4163	CONSENSUS	1			BI&BC&HCNC&GISC&HCC&SCH	MHdis&GIScan	disANDcan		negative_regulation_of_canonical_Wnt_sig...	MCC												10576	CONSENSUS	1			BC&GISC	GIScan	can	RPSFB	'de_novo'_posttranslational_protein_fold...&toxin_transport	CCT2
4172	CONSENSUS	1			CNSC&GISC&MG&MEL&NSC	CNScan&GIScan	can			MCM3												10694	CONSENSUS	1						RPSFB	'de_novo'_posttranslational_protein_fold...&toxin_transport	CCT8
4301	CONSENSUS	1			BC&HCNC&GISC&PD	GIScan&CNSdis	disANDcan		cell_junction_assembly&adherens_junction_organization	MLLT4												10787	CONSENSUS	1						Unknown	small_GTPase_mediated_signal_transductio...&vascular_endothelial_growth_factor_recep...&Ras_protein_signal_transduction&viral_process&innate_immune_response&Fc-gamma_receptor_signaling_pathway_invo...	NCKAP1
4646	CONSENSUS	1			HTN				synaptic_transmission&regulation_of_synaptic_plasticity&synapse_assembly	MYO6												10935	CONSENSUS	1			AD&BC&CNSC&HCNC&GISC&HCC&NSC&PD	CNSdis&CNScan&GIScan	disANDcan		negative_regulation_of_apoptotic_process	PRDX3
5499	CONSENSUS	1			GISC&NSC&SCC	GIScan&CNScan	can		translational_initiation	PPP1CA												10989	CONSENSUS	1			FTD	CNSdis	dis			IMMT
5518	CONSENSUS	1			BC&ID	MHdis	dis	Intracellular_Signal_Transduction	fibroblast_growth_factor_receptor_signal...&nuclear-transcribed_mRNA_catabolic_proce...&G2/M_transition_of_mitotic_cell_cycle	PPP2R1A												1191	CONSENSUS	1			AD&ANSN&BC&HCNC&GISC&HCC&HTN&MEL&NSC&NB&PD&PNSN&SCH&SCC&SC&SCA	CNSdis&CNScan&GIScan&MHdis	disANDcan		innate_immune_response&negative_regulation_of_apoptotic_process&platelet_activation&intrinsic_apoptotic_signaling_pathway	CLU
5879	CONSENSUS	1		YES	AD&ASD&AUT&BC&HCNC&Epi&GISC&HCC&HTN&MG&MEL&SCC&SC&SCA	CNSdis&MHdis&GIScan&CNScan	disANDcan	Intracellular_Signal_Transduction	axon_guidance&small_GTPase_mediated_signal_transductio...&vascular_endothelial_growth_factor_recep...&Ras_protein_signal_transduction&neurotrophin_TRK_receptor_signaling_path...&Fc-epsilon_receptor_signaling_pathway&viral_process&synaptic_transmission&innate_immune_response&ephrin_receptor_signaling_pathway&cell_junction_assembly&adherens_junction_organization&platelet_activation&Fc-gamma_recepto…	RAC1												1314	CONSENSUS	1			GISC&HCC	GIScan	can			COPA
5908	CONSENSUS	1			BI&GISC&HCC&MG&SCC	MHdis&GIScan&CNScan	disANDcan	Intracellular_Signal_Transduction	small_GTPase_mediated_signal_transductio...&Ras_protein_signal_transduction&cell_junction_assembly&platelet_activation	RAP1B												1315	CONSENSUS	1							viral_process	COPB1
60	CONSENSUS	1			BC&HCNC&GISC&PD&SCH	GIScan&CNSdis&MHdis	disANDcan	Structural_plasticity	axon_guidance&small_GTPase_mediated_signal_transductio...&vascular_endothelial_growth_factor_recep...&innate_immune_response&ephrin_receptor_signaling_pathway&cell_junction_assembly&adherens_junction_organization&platelet_activation&Fc-gamma_receptor_signaling_pathway_invo...&'de_novo'_posttranslational_protein_fold...&substantia_nigra_development	ACTB												1434	CONSENSUS	1			GISC&HCC	GIScan	can			CSE1L
71	CONSENSUS	1			SCH	MHdis	dis	Structural_plasticity	axon_guidance&small_GTPase_mediated_signal_transductio...&vascular_endothelial_growth_factor_recep...&innate_immune_response&ephrin_receptor_signaling_pathway&cell_junction_assembly&adherens_junction_organization&platelet_activation&Fc-gamma_receptor_signaling_pathway_invo...	ACTG1												1445	CONSENSUS	1			ANSN&BC&HCNC&GISC&HTN&MEL&NSC&NB&PNSN	CNScan&GIScan	can		epidermal_growth_factor_receptor_signali...&innate_immune_response&adherens_junction_organization&platelet_activation	CSK
801	CONSENSUS	1			AD&SCH	CNSdis&MHdis	dis	Intracellular_Signal_Transduction	axon_guidance&small_GTPase_mediated_signal_transductio...&vascular_endothelial_growth_factor_recep...&activation_of_MAPKK_activity&Ras_protein_signal_transduction&neurotrophin_TRK_receptor_signaling_path...&Fc-epsilon_receptor_signaling_pathway&epidermal_growth_factor_receptor_signali...&insulin_receptor_signaling_pathway&fibroblast_growth_factor_receptor_signal...&stimulatory_C-type_lectin_recep…	CALM1												146691	CONSENSUS	1								TOM1L2
84790	CONSENSUS	1			GISC&HCC	GIScan	can		'de_novo'_posttranslational_protein_fold...	TUBA1C												1495	CONSENSUS	1	YES		BC&GISC&SCC&SC&SCA	GIScan	can	Intracellular_Signal_Transduction	small_GTPase_mediated_signal_transductio...&vascular_endothelial_growth_factor_recep...&cell_junction_assembly&adherens_junction_organization&negative_regulation_of_apoptotic_process	CTNNA1
8500	CONSENSUS	1	YES		BC&Epi&GISC&SCC	CNSdis&GIScan	disANDcan	Protein_cluster	synaptic_transmission&actin_filament_bundle_assembly&neurotransmitter_secretion	PPFIA1												1499	CONSENSUS	1	YES		AD&ASD&AUT&ANSN&BI&BC&CNSC&HCNC&FTD&GAC&GISC&HCC&HTN&ID&MG&MEL&NSC&NB&PNSN&SCH&SCC&SC&SCA	CNSdis&MHdis&CNScan&GIScan	disANDcan	Intracellular_Signal_Transduction	small_GTPase_mediated_signal_transductio...&fibroblast_growth_factor_receptor_signal...&synaptic_transmission&positive_regulation_of_canonical_Wnt_sig...&innate_immune_response&cell_junction_assembly&adherens_junction_organization&negative_regulation_of_apoptotic_process	CTNNB1
8607	CONSENSUS	1			BC&HCNC&GISC	GIScan	can			RUVBL1												1500	CONSENSUS	1	YES		ASD&AUT&BC&GISC&HCC&MEL&SCC	MHdis&GIScan	disANDcan	Intracellular_Signal_Transduction	vascular_endothelial_growth_factor_recep...&negative_regulation_of_canonical_Wnt_sig...&cell_junction_assembly&adherens_junction_organization	CTNND1
8874	CONSENSUS	1	YES		BC&HCNC&GISC&MG	GIScan&CNScan	can		axon_guidance&small_GTPase_mediated_signal_transductio...&Ras_protein_signal_transduction&neurotrophin_TRK_receptor_signaling_path...&epidermal_growth_factor_receptor_signali...&ephrin_receptor_signaling_pathway&cell_junction_assembly&adherens_junction_organization&negative_regulation_of_epidermal_growth_...	ARHGEF7												152185	CONSENSUS	1								SPICE1
8878	CONSENSUS	1			AD&ANSN&BC&FTD&GISC&HCC&MG&MEL&NSC&NB&PD&PNSN&SCC	CNSdis&CNScan&GIScan	disANDcan		small_GTPase_mediated_signal_transductio...&Ras_protein_signal_transduction&neurotrophin_TRK_receptor_signaling_path...&negative_regulation_of_apoptotic_process	SQSTM1												163	CONSENSUS	1			FTD	CNSdis	dis	Endocytosis	axon_guidance&neurotrophin_TRK_receptor_signaling_path...&epidermal_growth_factor_receptor_signali...&viral_process&synaptic_transmission&ephrin_receptor_signaling_pathway&negative_regulation_of_epidermal_growth_...	AP2B1
9361	CONSENSUS	1								LONP1												1642	CONSENSUS	1							viral_process&negative_regulation_of_apoptotic_process	DDB1
998	CONSENSUS	1			BC&HCNC&Epi&GISC&HCC&MEL&SCH&SCC	CNSdis&GIScan&MHdis	disANDcan	Structural_plasticity	axon_guidance&small_GTPase_mediated_signal_transductio...&vascular_endothelial_growth_factor_recep...&epidermal_growth_factor_receptor_signali...&innate_immune_response&ephrin_receptor_signaling_pathway&adherens_junction_organization&Fc-gamma_receptor_signaling_pathway_invo...&actin_filament_bundle_assembly&substantia_nigra_development&negative_regulation_of_epidermal_growth_...	CDC42												1655	CONSENSUS	1			BC&HCNC&GISC&MG	GIScan&CNScan	can		viral_process&intrinsic_apoptotic_signaling_pathway	DDX5
9414	CONSENSUS	1			BI&GISC	MHdis&GIScan	disANDcan		GDP_metabolic_process&GMP_metabolic_process	TJP2												1738	CONSENSUS	1			SCH	MHdis	dis			DLD
85440	CONSENSUS	1			Epi	CNSdis	dis		small_GTPase_mediated_signal_transductio...	DOCK7												1829	CONSENSUS	1			HCNC&GISC&MEL&PD&SCC	GIScan&CNSdis	disANDcan			DSG2
																						1838	CONSENSUS	1								DTNB
																						192111	CONSENSUS	1								PGAM5
																						1981	CONSENSUS	1			BC&GISC&PD&SCC	GIScan&CNSdis	disANDcan		insulin_receptor_signaling_pathway&viral_process&nuclear-transcribed_mRNA_catabolic_proce...&translational_initiation	EIF4G1
																						203068	CONSENSUS	1			BC&FTD&SCH	CNSdis&MHdis	dis	Structural_plasticity	innate_immune_response&G2/M_transition_of_mitotic_cell_cycle	TUBB
																						2064	CONSENSUS	1			AD&BC&CNSC&HCNC&GAC&GISC&HCC&ID&MG&MEL&NSC&PD&PNSN&SCC&SC&SCA	CNSdis&CNScan&GIScan&MHdis	disANDcan	CAT_signaling	axon_guidance&small_GTPase_mediated_signal_transductio...&vascular_endothelial_growth_factor_recep...&activation_of_MAPKK_activity&Ras_protein_signal_transduction&neurotrophin_TRK_receptor_signaling_path...&Fc-epsilon_receptor_signaling_pathway&epidermal_growth_factor_receptor_signali...&insulin_receptor_signaling_pathway&fibroblast_growth_factor_receptor_signal...&innate_immune_response	ERBB2
																						219771	CONSENSUS	1			GISC&HCC&MG&PD	GIScan&CNScan&CNSdis	disANDcan		G2/M_transition_of_mitotic_cell_cycle	CCNY
																						2239	CONSENSUS	1								GPC4
																						22800	CONSENSUS	1			AD&BC&Epi&GISC&HCC	CNSdis&GIScan	disANDcan		small_GTPase_mediated_signal_transductio...&Ras_protein_signal_transduction	RRAS2
																						22870	CONSENSUS	1								PPP6R1
																						22948	CONSENSUS	1							'de_novo'_posttranslational_protein_fold...&toxin_transport	CCT5
																						23002	CONSENSUS	1			BC				small_GTPase_mediated_signal_transductio...	DAAM1
																						23094	CONSENSUS	1							small_GTPase_mediated_signal_transductio...	SIPA1L3
																						23138	CONSENSUS	1								N4BP3
																						23164	CONSENSUS	1			HCNC&GISC	GIScan	can			MPRIP
																						23197	CONSENSUS	1			AD	CNSdis	dis			FAF2
																						23243	CONSENSUS	1								ANKRD28
																						23384	CONSENSUS	1								SPECC1L
																						23513	CONSENSUS	1	YES		BC&HCNC&GISC	GIScan	can		viral_process&synaptic_transmission&neurotransmitter_secretion	SCRIB
																						26037	CONSENSUS	1			AD&SCH	CNSdis&MHdis	dis		small_GTPase_mediated_signal_transductio...&synaptic_transmission&ephrin_receptor_signaling_pathway&regulation_of_synaptic_plasticity	SIPA1L1
																						27347	CONSENSUS	1			ASD&AUT&HTN&PD	MHdis&CNSdis	dis			STK39
																						2771	CONSENSUS	1			GISC&SCC	GIScan	can	G-protein_relay	activation_of_MAPKK_activity&synaptic_transmission&platelet_activation	GNAI2
																						2778	CONSENSUS	1			AD&ANSN&BC&GAC&GISC&HTN&MG&MEL&NSC&NB&PNSN&SCH&SC&SCA	CNSdis&CNScan&GIScan&MHdis	disANDcan	G-protein_relay	platelet_activation	GNAS
																						2782	CONSENSUS	1			BC&MEL&SCH	MHdis	dis	G-protein_relay	small_GTPase_mediated_signal_transductio...&Ras_protein_signal_transduction&synaptic_transmission&platelet_activation	GNB1
																						2783	CONSENSUS	1			SCH	MHdis	dis	G-protein_relay	synaptic_transmission	GNB2
																						28964	CONSENSUS	1	YES		BC&GISC&HD&SCC	GIScan&CNSdis	disANDcan	Endocytosis	axon_guidance&ephrin_receptor_signaling_pathway	GIT1
																						292	CONSENSUS	1		YES	BC&GISC&HCC	GIScan	can	Cell_metabolism	viral_process&negative_regulation_of_apoptotic_process	SLC25A5
																						2969	CONSENSUS	1			ASD&AUT&ID&NSC	MHdis&CNScan	disANDcan			GTF2I
																						29763	CONSENSUS	1								PACSIN3
																						29766	CONSENSUS	1							actin_filament_capping	TMOD3
																						3030	CONSENSUS	1			GISC&HTN&SCC	GIScan	can			HADHA
																						3032	CONSENSUS	1								HADHB
																						3185	CONSENSUS	1			GISC	GIScan	can			HNRNPF
																						3281	CONSENSUS	1			SCC					HSBP1
																						3301	CONSENSUS	1						RPSFB	negative_regulation_of_apoptotic_process&toxin_transport	DNAJA1
																						3313	CONSENSUS	1			AD&ANSN&BC&HCNC&GISC&HCC&NSC&NB&PD&PNSN&SCH&SCC	CNSdis&CNScan&GIScan&MHdis	disANDcan		negative_regulation_of_apoptotic_process	HSPA9
																						3416	CONSENSUS	1			AD&BC&ID&NSC&PD	CNSdis&MHdis&CNScan	disANDcan		insulin_receptor_signaling_pathway&viral_process	IDE
																						3728	CONSENSUS	1			BC&CNSC&GISC&HCC&MG&NSC&SCC	CNScan&GIScan	can		vascular_endothelial_growth_factor_recep...&positive_regulation_of_canonical_Wnt_sig...&cell_junction_assembly&adherens_junction_organization	JUP
																						3735	CONSENSUS	1							viral_process	KARS
																						387	CONSENSUS	1			AD&BC&HCNC&Epi&GAC&GISC&HCC&HTN&MG&MEL&NSC&SCC&SC&SCA	CNSdis&GIScan&CNScan	disANDcan	Intracellular_Signal_Transduction	axon_guidance&small_GTPase_mediated_signal_transductio...&vascular_endothelial_growth_factor_recep...&Ras_protein_signal_transduction&neurotrophin_TRK_receptor_signaling_path...&viral_process&ephrin_receptor_signaling_pathway&cell_junction_assembly&platelet_activation&actin_filament_bundle_assembly&substantia_nigra_development	RHOA
																						389	CONSENSUS	1			BC&CNSC&GISC&HCC&HTN&MEL&NSC&SCC&SC&SCA	CNScan&GIScan	can		axon_guidance&small_GTPase_mediated_signal_transductio...&cell_junction_assembly	RHOC
																						4067	CONSENSUS	1			BC&GISC&MG	GIScan&CNScan	can		axon_guidance&Fc-epsilon_receptor_signaling_pathway&stimulatory_C-type_lectin_receptor_signa...&viral_process&innate_immune_response&ephrin_receptor_signaling_pathway&platelet_activation&Fc-gamma_receptor_signaling_pathway_invo...	LYN
																						4174	CONSENSUS	1			BC&HCNC&GISC	GIScan	can			MCM5
																						4311	CONSENSUS	1			AD&BC&HCNC&GISC&MEL&SCC&SC&SCA	CNSdis&GIScan	disANDcan			MME
																						4430	CONSENSUS	1			GISC&HCC	GIScan	can		actin_filament_bundle_assembly	MYO1B
																						4637	CONSENSUS	1						Structural_plasticity	axon_guidance&small_GTPase_mediated_signal_transductio...&ephrin_receptor_signaling_pathway	MYL6
																						4641	CONSENSUS	1							innate_immune_response&cell_junction_assembly&Fc-gamma_receptor_signaling_pathway_invo...	MYO1C
																						4642	CONSENSUS	1			HTN&SCH	MHdis	dis			MYO1D
																						4647	CONSENSUS	1			MEL				neuromuscular_process_controlling_balanc...	MYO7A
																						4651	CONSENSUS	1			BI&BC	MHdis	dis		axon_guidance&innate_immune_response&Fc-gamma_receptor_signaling_pathway_invo...	MYO10
																						4673	CONSENSUS	1								NAP1L1
																						4722	CONSENSUS	1			AD&BC&SCH	CNSdis&MHdis	dis		negative_regulation_of_apoptotic_process&substantia_nigra_development&intrinsic_apoptotic_signaling_pathway	NDUFS3
																						4734	CONSENSUS	1			GISC&PD&SCH	GIScan&CNSdis&MHdis	disANDcan		vascular_endothelial_growth_factor_recep...&viral_process&protein_polyubiquitination	NEDD4
																						4736	CONSENSUS	1							viral_process&nuclear-transcribed_mRNA_catabolic_proce...&SRP-dependent_cotranslational_protein_ta...&translational_initiation	RPL10A
																						476	CONSENSUS	1			ASD&AUT&CNSC&HTN&MEL&NSC	MHdis&CNScan	disANDcan	Ion_balance/transport		ATP1A1
																						4967	CONSENSUS	1			AD	CNSdis	dis			OGDH
																						5052	CONSENSUS	1		YES	AD&BC&HCNC&GISC&HCC&MG&MEL&SCH&SCC	CNSdis&GIScan&CNScan&MHdis	disANDcan	Cell_metabolism	innate_immune_response	PRDX1
																						5108	CONSENSUS	1			Epi&SCH	CNSdis&MHdis	dis		G2/M_transition_of_mitotic_cell_cycle	PCM1
																						51429	CONSENSUS	1								SNX9
																						51474	CONSENSUS	1			BC&GISC	GIScan	can		actin_filament_bundle_assembly	LIMA1
																						5250	CONSENSUS	1			SCH	MHdis	dis			SLC25A3
																						5295	CONSENSUS	1			ANSN&BC&HCNC&GISC&HCC&HTN&MG&NSC&NB&PNSN	CNScan&GIScan	can		vascular_endothelial_growth_factor_recep...&neurotrophin_TRK_receptor_signaling_path...&Fc-epsilon_receptor_signaling_pathway&epidermal_growth_factor_receptor_signali...&insulin_receptor_signaling_pathway&fibroblast_growth_factor_receptor_signal...&viral_process&innate_immune_response&negative_regulation_of_apoptotic_process&platelet_activation&Fc-gamma_receptor_signaling_pathway_invo...&actin_fi…	PIK3R1
																						5337	CONSENSUS	1			BC&GISC&MG&MEL&SCH	GIScan&CNScan&MHdis	disANDcan	Intracellular_Signal_Transduction	small_GTPase_mediated_signal_transductio...&Ras_protein_signal_transduction	PLD1
																						54431	CONSENSUS	1			ANSN&NSC&NB&PNSN	CNScan	can		intrinsic_apoptotic_signaling_pathway	DNAJC10
																						54472	CONSENSUS	1			AD&HD	CNSdis	dis		innate_immune_response	TOLLIP
																						54927	CONSENSUS	1								CHCHD3
																						5500	CONSENSUS	1			MEL&NSC	CNScan	can	Intracellular_Signal_Transduction	small_GTPase_mediated_signal_transductio...&G2/M_transition_of_mitotic_cell_cycle	PPP1CB
																						5516	CONSENSUS	1						Intracellular_Signal_Transduction	small_GTPase_mediated_signal_transductio...&Ras_protein_signal_transduction&fibroblast_growth_factor_receptor_signal...	PPP2CB
																						5520	CONSENSUS	1							nuclear-transcribed_mRNA_catabolic_proce...&G2/M_transition_of_mitotic_cell_cycle	PPP2R2A
																						55210	CONSENSUS	1			MG	CNScan	can		negative_regulation_of_apoptotic_process	ATAD3A
																						55227	CONSENSUS	1			GISC&HCC	GIScan	can			LRRC1
																						5529	CONSENSUS	1								PPP2R5E
																						5530	CONSENSUS	1		YES	AD&FTD&GISC&HCC&SCH	CNSdis&GIScan&MHdis	disANDcan	Intracellular_Signal_Transduction	Fc-epsilon_receptor_signaling_pathway&stimulatory_C-type_lectin_receptor_signa...&synaptic_transmission&innate_immune_response	PPP3CA
																						5571	CONSENSUS	1			BC&GISC	GIScan	can		insulin_receptor_signaling_pathway	PRKAG1
																						55824	CONSENSUS	1			GISC&SCH	GIScan&MHdis	disANDcan		epidermal_growth_factor_receptor_signali...	PAG1
																						55914	CONSENSUS	1			BC&GISC	GIScan	can	CAT_signaling	epidermal_growth_factor_receptor_signali...&innate_immune_response	ERBB2IP
																						56243	CONSENSUS	1								KIAA1217
																						5683	CONSENSUS	1							axon_guidance&small_GTPase_mediated_signal_transductio...&vascular_endothelial_growth_factor_recep...&activation_of_MAPKK_activity&Ras_protein_signal_transduction&neurotrophin_TRK_receptor_signaling_path...&Fc-epsilon_receptor_signaling_pathway&epidermal_growth_factor_receptor_signali...&insulin_receptor_signaling_pathway&fibroblast_growth_factor_receptor_signal...&DNA_damage_response,_signal_tra…	PSMA2
																						5685	CONSENSUS	1							axon_guidance&small_GTPase_mediated_signal_transductio...&vascular_endothelial_growth_factor_recep...&activation_of_MAPKK_activity&Ras_protein_signal_transduction&neurotrophin_TRK_receptor_signaling_path...&Fc-epsilon_receptor_signaling_pathway&epidermal_growth_factor_receptor_signali...&insulin_receptor_signaling_pathway&fibroblast_growth_factor_receptor_signal...&DNA_damage_response,_signal_tra…	PSMA4
																						5686	CONSENSUS	1							axon_guidance&small_GTPase_mediated_signal_transductio...&vascular_endothelial_growth_factor_recep...&activation_of_MAPKK_activity&Ras_protein_signal_transduction&neurotrophin_TRK_receptor_signaling_path...&Fc-epsilon_receptor_signaling_pathway&epidermal_growth_factor_receptor_signali...&insulin_receptor_signaling_pathway&fibroblast_growth_factor_receptor_signal...&DNA_damage_response,_signal_tra…	PSMA5
																						5687	CONSENSUS	1			HTN				axon_guidance&small_GTPase_mediated_signal_transductio...&vascular_endothelial_growth_factor_recep...&activation_of_MAPKK_activity&Ras_protein_signal_transduction&neurotrophin_TRK_receptor_signaling_path...&Fc-epsilon_receptor_signaling_pathway&epidermal_growth_factor_receptor_signali...&insulin_receptor_signaling_pathway&fibroblast_growth_factor_receptor_signal...&DNA_damage_response,_signal_tra…	PSMA6
																						5688	CONSENSUS	1			GISC	GIScan	can		axon_guidance&small_GTPase_mediated_signal_transductio...&vascular_endothelial_growth_factor_recep...&activation_of_MAPKK_activity&Ras_protein_signal_transduction&neurotrophin_TRK_receptor_signaling_path...&Fc-epsilon_receptor_signaling_pathway&epidermal_growth_factor_receptor_signali...&insulin_receptor_signaling_pathway&fibroblast_growth_factor_receptor_signal...&DNA_damage_response,_signal_tra…	PSMA7
																						5689	CONSENSUS	1			PD	CNSdis	dis		axon_guidance&small_GTPase_mediated_signal_transductio...&vascular_endothelial_growth_factor_recep...&activation_of_MAPKK_activity&Ras_protein_signal_transduction&neurotrophin_TRK_receptor_signaling_path...&Fc-epsilon_receptor_signaling_pathway&epidermal_growth_factor_receptor_signali...&insulin_receptor_signaling_pathway&fibroblast_growth_factor_receptor_signal...&DNA_damage_response,_signal_tra…	PSMB1
																						5691	CONSENSUS	1							axon_guidance&small_GTPase_mediated_signal_transductio...&vascular_endothelial_growth_factor_recep...&activation_of_MAPKK_activity&Ras_protein_signal_transduction&neurotrophin_TRK_receptor_signaling_path...&Fc-epsilon_receptor_signaling_pathway&epidermal_growth_factor_receptor_signali...&insulin_receptor_signaling_pathway&fibroblast_growth_factor_receptor_signal...&DNA_damage_response,_signal_tra…	PSMB3
																						5694	CONSENSUS	1							axon_guidance&small_GTPase_mediated_signal_transductio...&vascular_endothelial_growth_factor_recep...&activation_of_MAPKK_activity&Ras_protein_signal_transduction&neurotrophin_TRK_receptor_signaling_path...&Fc-epsilon_receptor_signaling_pathway&epidermal_growth_factor_receptor_signali...&insulin_receptor_signaling_pathway&fibroblast_growth_factor_receptor_signal...&DNA_damage_response,_signal_tra…	PSMB6
																						5701	CONSENSUS	1							axon_guidance&small_GTPase_mediated_signal_transductio...&vascular_endothelial_growth_factor_recep...&activation_of_MAPKK_activity&Ras_protein_signal_transduction&neurotrophin_TRK_receptor_signaling_path...&Fc-epsilon_receptor_signaling_pathway&epidermal_growth_factor_receptor_signali...&insulin_receptor_signaling_pathway&fibroblast_growth_factor_receptor_signal...&DNA_damage_response,_signal_tra…	PSMC2
																						5702	CONSENSUS	1							axon_guidance&small_GTPase_mediated_signal_transductio...&vascular_endothelial_growth_factor_recep...&activation_of_MAPKK_activity&Ras_protein_signal_transduction&neurotrophin_TRK_receptor_signaling_path...&Fc-epsilon_receptor_signaling_pathway&epidermal_growth_factor_receptor_signali...&insulin_receptor_signaling_pathway&fibroblast_growth_factor_receptor_signal...&DNA_damage_response,_signal_tra…	PSMC3
																						5705	CONSENSUS	1							axon_guidance&small_GTPase_mediated_signal_transductio...&vascular_endothelial_growth_factor_recep...&activation_of_MAPKK_activity&Ras_protein_signal_transduction&neurotrophin_TRK_receptor_signaling_path...&Fc-epsilon_receptor_signaling_pathway&epidermal_growth_factor_receptor_signali...&insulin_receptor_signaling_pathway&fibroblast_growth_factor_receptor_signal...&DNA_damage_response,_signal_tra…	PSMC5
																						5706	CONSENSUS	1							axon_guidance&small_GTPase_mediated_signal_transductio...&vascular_endothelial_growth_factor_recep...&activation_of_MAPKK_activity&Ras_protein_signal_transduction&neurotrophin_TRK_receptor_signaling_path...&Fc-epsilon_receptor_signaling_pathway&epidermal_growth_factor_receptor_signali...&insulin_receptor_signaling_pathway&fibroblast_growth_factor_receptor_signal...&DNA_damage_response,_signal_tra…	PSMC6
																						5708	CONSENSUS	1			PD	CNSdis	dis		axon_guidance&small_GTPase_mediated_signal_transductio...&vascular_endothelial_growth_factor_recep...&activation_of_MAPKK_activity&Ras_protein_signal_transduction&neurotrophin_TRK_receptor_signaling_path...&Fc-epsilon_receptor_signaling_pathway&epidermal_growth_factor_receptor_signali...&insulin_receptor_signaling_pathway&fibroblast_growth_factor_receptor_signal...&DNA_damage_response,_signal_tra…	PSMD2
																						5710	CONSENSUS	1			GISC	GIScan	can		axon_guidance&small_GTPase_mediated_signal_transductio...&vascular_endothelial_growth_factor_recep...&activation_of_MAPKK_activity&Ras_protein_signal_transduction&neurotrophin_TRK_receptor_signaling_path...&Fc-epsilon_receptor_signaling_pathway&epidermal_growth_factor_receptor_signali...&insulin_receptor_signaling_pathway&fibroblast_growth_factor_receptor_signal...&DNA_damage_response,_signal_tra…	PSMD4
																						5714	CONSENSUS	1							axon_guidance&small_GTPase_mediated_signal_transductio...&vascular_endothelial_growth_factor_recep...&activation_of_MAPKK_activity&Ras_protein_signal_transduction&neurotrophin_TRK_receptor_signaling_path...&Fc-epsilon_receptor_signaling_pathway&epidermal_growth_factor_receptor_signali...&insulin_receptor_signaling_pathway&fibroblast_growth_factor_receptor_signal...&DNA_damage_response,_signal_tra…	PSMD8
																						5717	CONSENSUS	1							axon_guidance&small_GTPase_mediated_signal_transductio...&vascular_endothelial_growth_factor_recep...&activation_of_MAPKK_activity&Ras_protein_signal_transduction&neurotrophin_TRK_receptor_signaling_path...&Fc-epsilon_receptor_signaling_pathway&epidermal_growth_factor_receptor_signali...&insulin_receptor_signaling_pathway&fibroblast_growth_factor_receptor_signal...&DNA_damage_response,_signal_tra…	PSMD11
																						5718	CONSENSUS	1							axon_guidance&small_GTPase_mediated_signal_transductio...&vascular_endothelial_growth_factor_recep...&activation_of_MAPKK_activity&Ras_protein_signal_transduction&neurotrophin_TRK_receptor_signaling_path...&Fc-epsilon_receptor_signaling_pathway&epidermal_growth_factor_receptor_signali...&insulin_receptor_signaling_pathway&fibroblast_growth_factor_receptor_signal...&DNA_damage_response,_signal_tra…	PSMD12
																						58190	CONSENSUS	1								CTDSP1
																						5830	CONSENSUS	1								PEX5
																						5862	CONSENSUS	1			ID	MHdis	dis	Intracellular_trafficking	small_GTPase_mediated_signal_transductio...&Ras_protein_signal_transduction	RAB2A
																						5880	CONSENSUS	1			BC&Epi	CNSdis	dis		axon_guidance&small_GTPase_mediated_signal_transductio...&platelet_activation	RAC2
																						5898	CONSENSUS	1			GISC&HCC&NSC&PNSN	GIScan&CNScan	can	Intracellular_Signal_Transduction	small_GTPase_mediated_signal_transductio...&Ras_protein_signal_transduction&neurotrophin_TRK_receptor_signaling_path...&viral_process	RALA
																						5906	CONSENSUS	1			BC&Epi&GISC&SCC	CNSdis&GIScan	disANDcan		small_GTPase_mediated_signal_transductio...&activation_of_MAPKK_activity&Ras_protein_signal_transduction&neurotrophin_TRK_receptor_signaling_path...&synaptic_transmission&cell_junction_assembly&platelet_activation&neurotransmitter_secretion	RAP1A
																						5917	CONSENSUS	1								RARS
																						5955	CONSENSUS	1			Epi	CNSdis	dis			RCN2
																						6133	CONSENSUS	1							viral_process&nuclear-transcribed_mRNA_catabolic_proce...&SRP-dependent_cotranslational_protein_ta...&translational_initiation	RPL9
																						6138	CONSENSUS	1			GISC&SC	GIScan	can		viral_process&nuclear-transcribed_mRNA_catabolic_proce...&SRP-dependent_cotranslational_protein_ta...&translational_initiation	RPL15
																						6152	CONSENSUS	1			GISC&HCC	GIScan	can		axon_guidance&viral_process&nuclear-transcribed_mRNA_catabolic_proce...&SRP-dependent_cotranslational_protein_ta...&translational_initiation	RPL24
																						6189	CONSENSUS	1			AD	CNSdis	dis	RPSFB	viral_process&negative_regulation_of_apoptotic_process&nuclear-transcribed_mRNA_catabolic_proce...&SRP-dependent_cotranslational_protein_ta...&translational_initiation	RPS3A
																						6206	CONSENSUS	1			SCC				viral_process&nuclear-transcribed_mRNA_catabolic_proce...&SRP-dependent_cotranslational_protein_ta...&translational_initiation	RPS12
																						6207	CONSENSUS	1			BI&SCH	MHdis	dis		viral_process&nuclear-transcribed_mRNA_catabolic_proce...&SRP-dependent_cotranslational_protein_ta...&translational_initiation	RPS13
																						6208	CONSENSUS	1		YES					viral_process&nuclear-transcribed_mRNA_catabolic_proce...&SRP-dependent_cotranslational_protein_ta...&translational_initiation	RPS14
																						6217	CONSENSUS	1						RPSFB	viral_process&nuclear-transcribed_mRNA_catabolic_proce...&SRP-dependent_cotranslational_protein_ta...&translational_initiation	RPS16
																						6232	CONSENSUS	1			MEL				small_GTPase_mediated_signal_transductio...&viral_process&nuclear-transcribed_mRNA_catabolic_proce...&SRP-dependent_cotranslational_protein_ta...&translational_initiation	RPS27
																						6237	CONSENSUS	1			BC&HD&MG	CNSdis&CNScan	disANDcan		axon_guidance&small_GTPase_mediated_signal_transductio...&Ras_protein_signal_transduction&synaptic_transmission	RRAS
																						6331	CONSENSUS	1			BC&HCNC&Epi&GISC&MG	CNSdis&GIScan&CNScan	disANDcan	Excitability	axon_guidance	SCN5A
																						6396	CONSENSUS	1							small_GTPase_mediated_signal_transductio...	SEC13
																						64423	CONSENSUS	1								INF2
																						6645	CONSENSUS	1								SNTB2
																						6714	CONSENSUS	1			AD&ASD&AUT&BC&CNSC&HCNC&GISC&HCC&MG&MEL&NSC&SCC	CNSdis&MHdis&CNScan&GIScan	disANDcan		axon_guidance&small_GTPase_mediated_signal_transductio...&vascular_endothelial_growth_factor_recep...&Ras_protein_signal_transduction&neurotrophin_TRK_receptor_signaling_path...&epidermal_growth_factor_receptor_signali...&fibroblast_growth_factor_receptor_signal...&stimulatory_C-type_lectin_receptor_signa...&viral_process&positive_regulation_of_canonical_Wnt_sig...&innate_immune_response&ephrin_r…	SRC
																						6774	CONSENSUS	1			ANSN&BC&CNSC&HCNC&GAC&GISC&HCC&HTN&MG&MEL&NSC&NB&PNSN&SCC&SC&SCA	CNScan&GIScan	can		neurotrophin_TRK_receptor_signaling_path...&viral_process&negative_regulation_of_apoptotic_process	STAT3
																						6840	CONSENSUS	1								SVIL
																						6950	CONSENSUS	1			BC&FTD&GISC&HCC	CNSdis&GIScan	disANDcan	Structural_plasticity	'de_novo'_posttranslational_protein_fold...&toxin_transport	TCP1
																						7001	CONSENSUS	1			AD&BC&FTD&GISC&HCC&MG&MEL&PD&SCH	CNSdis&GIScan&CNScan&MHdis	disANDcan	Cell_metabolism	negative_regulation_of_apoptotic_process	PRDX2
																						7082	CONSENSUS	1			BC&GISC&HCC&MEL&SCH	GIScan&MHdis	disANDcan		cell_junction_assembly	TJP1
																						7167	CONSENSUS	1			AD&MEL&SCH	CNSdis&MHdis	dis			TPI1
																						7170	CONSENSUS	1			HCNC&GISC&HCC&SCH	GIScan&MHdis	disANDcan			TPM3
																						7203	CONSENSUS	1			GISC&HCC&SCH	GIScan&MHdis	disANDcan	RPSFB	'de_novo'_posttranslational_protein_fold...&toxin_transport	CCT3
																						7277	CONSENSUS	1			BC&FTD	CNSdis	dis		platelet_activation&'de_novo'_posttranslational_protein_fold...&G2/M_transition_of_mitotic_cell_cycle	TUBA4A
																						7284	CONSENSUS	1								TUFM
																						7402	CONSENSUS	1			BC&Epi	CNSdis	dis			UTRN
																						7525	CONSENSUS	1			BC&HCNC&GISC&HCC&MEL&SCC	GIScan	can		axon_guidance&innate_immune_response&ephrin_receptor_signaling_pathway&Fc-gamma_receptor_signaling_pathway_invo...	YES1
																						7529	CONSENSUS	1			CNSC&NSC&SCH&SCC	CNScan&MHdis	disANDcan	Intracellular_Signal_Transduction	axon_guidance&small_GTPase_mediated_signal_transductio...&vascular_endothelial_growth_factor_recep...&activation_of_MAPKK_activity&Ras_protein_signal_transduction&neurotrophin_TRK_receptor_signaling_path...&Fc-epsilon_receptor_signaling_pathway&epidermal_growth_factor_receptor_signali...&insulin_receptor_signaling_pathway&fibroblast_growth_factor_receptor_signal...&viral_process&innate_immune_res…	YWHAB
																						7531	CONSENSUS	1		YES	BI&CNSC&GISC&HCC&NSC&SCH&SCC	MHdis&CNScan&GIScan	disANDcan	Intracellular_Signal_Transduction	small_GTPase_mediated_signal_transductio...&neurotrophin_TRK_receptor_signaling_path...&viral_process&substantia_nigra_development&intrinsic_apoptotic_signaling_pathway&G2/M_transition_of_mitotic_cell_cycle	YWHAE
																						7532	CONSENSUS	1			AD&BC&CNSC&Epi&GISC&HCC&NSC&SCH	CNSdis&CNScan&GIScan&MHdis	disANDcan	Intracellular_Signal_Transduction	small_GTPase_mediated_signal_transductio...&synaptic_transmission&regulation_of_synaptic_plasticity&intrinsic_apoptotic_signaling_pathway&G2/M_transition_of_mitotic_cell_cycle	YWHAG
																						7533	CONSENSUS	1			BI&CNSC&Epi&NSC&PD&SCH	MHdis&CNScan&CNSdis	disANDcan	Intracellular_Signal_Transduction	small_GTPase_mediated_signal_transductio...&synaptic_transmission&regulation_of_synaptic_plasticity&substantia_nigra_development&intrinsic_apoptotic_signaling_pathway	YWHAH
																						7846	CONSENSUS	1			SCH	MHdis	dis	Structural_plasticity	'de_novo'_posttranslational_protein_fold...&G2/M_transition_of_mitotic_cell_cycle	TUBA1A
																						79026	CONSENSUS	1								AHNAK
																						790	CONSENSUS	1								CAD
																						7965	CONSENSUS	1			GISC	GIScan	can			AIMP2
																						800	CONSENSUS	1			BC&HCNC&GISC&MG	GIScan&CNScan	can			CALD1
																						81704	CONSENSUS	1			GISC&HCC&ID&SCC	GIScan&MHdis	disANDcan		small_GTPase_mediated_signal_transductio...&negative_regulation_of_apoptotic_process	DOCK8
																						8239	CONSENSUS	1			BC&CNSC&GISC&HCC&ID&NSC	CNScan&GIScan&MHdis	disANDcan			USP9X
																						829	CONSENSUS	1			HTN&MEL				innate_immune_response&actin_filament_capping	CAPZA1
																						8301	CONSENSUS	1			AD&PD	CNSdis	dis	Endocytosis		PICALM
																						830	CONSENSUS	1		YES	GISC&HCC	GIScan	can	Structural_plasticity	innate_immune_response&actin_filament_capping	CAPZA2
																						8402	CONSENSUS	1								SLC25A11
																						8440	CONSENSUS	1			AD&MEL	CNSdis	dis		axon_guidance&vascular_endothelial_growth_factor_recep...&epidermal_growth_factor_receptor_signali...&ephrin_receptor_signaling_pathway&intrinsic_apoptotic_signaling_pathway&translational_initiation	NCK2
																						84445	CONSENSUS	1							negative_regulation_of_canonical_Wnt_sig...	LZTS2
																						8450	CONSENSUS	1			HCNC&GISC&HCC&ID	GIScan&MHdis	disANDcan			CUL4B
																						8451	CONSENSUS	1			BC&GISC&HCC	GIScan	can		viral_process&intrinsic_apoptotic_signaling_pathway	CUL4A
																						8496	CONSENSUS	1						Protein_cluster		PPFIBP1
																						8502	CONSENSUS	1			SCH	MHdis	dis	CAT_signaling	cell_junction_assembly	PKP4
																						8655	CONSENSUS	1			BC			Intracellular_trafficking	viral_process&substantia_nigra_development&intrinsic_apoptotic_signaling_pathway&G2/M_transition_of_mitotic_cell_cycle	DYNLL1
																						8826	CONSENSUS	1			BC&HCNC&GISC&HCC&MG	GIScan&CNScan	can		small_GTPase_mediated_signal_transductio...&epidermal_growth_factor_receptor_signali...&fibroblast_growth_factor_receptor_signal...	IQGAP1
																						9093	CONSENSUS	1			BC				small_GTPase_mediated_signal_transductio...&innate_immune_response&negative_regulation_of_apoptotic_process	DNAJA3
																						92609	CONSENSUS	1								TIMM50
																						9276	CONSENSUS	1							toxin_transport	COPB2
																						9349	CONSENSUS	1			SCC				viral_process&nuclear-transcribed_mRNA_catabolic_proce...&SRP-dependent_cotranslational_protein_ta...&translational_initiation	RPL23
																						9474	CONSENSUS	1			BC&GISC&HCC&MG&MEL&PD&SCC	GIScan&CNScan&CNSdis	disANDcan		viral_process&innate_immune_response&negative_regulation_of_apoptotic_process	ATG5
																						9500	CONSENSUS	1			BC&GISC&MG&MEL	GIScan&CNScan	can		neurotrophin_TRK_receptor_signaling_path...	MAGED1
																						9532	CONSENSUS	1			PD	CNSdis	dis			BAG2
																						9578	CONSENSUS	1								CDC42BPB
																						9584	CONSENSUS	1			BC					RBM39
																						9782	CONSENSUS	1								MATR3
																						9815	CONSENSUS	1								GIT2
																						9817	CONSENSUS	1			BC&HCNC&Epi&FEpi&GISC&MG&MEL&TLE	CNSdis&GIScan&CNScan	disANDcan		proteasomal_ubiquitin-independent_protei...	KEAP1
																						989	CONSENSUS	1			MG&SCH	CNScan&MHdis	disANDcan	Protein_cluster		SEPT7
																						999	CONSENSUS	1			BC&CNSC&HCNC&GAC&GCCA&GISC&HCC&HD&HTN&MG&MEL&NSC&SCC&SC&SCA	CNScan&GIScan&CNSdis	disANDcan	CAT_signaling	small_GTPase_mediated_signal_transductio...&cell_junction_assembly&adherens_junction_organization&synapse_assembly	CDH1
																						908	CONSENSUS	1			GISC&SCC	GIScan	can	RPSFB	'de_novo'_posttranslational_protein_fold...	CCT6A
																						9861	CONSENSUS	1							axon_guidance&small_GTPase_mediated_signal_transductio...&vascular_endothelial_growth_factor_recep...&activation_of_MAPKK_activity&Ras_protein_signal_transduction&neurotrophin_TRK_receptor_signaling_path...&Fc-epsilon_receptor_signaling_pathway&epidermal_growth_factor_receptor_signali...&insulin_receptor_signaling_pathway&fibroblast_growth_factor_receptor_signal...&DNA_damage_response,_signal_tra…	PSMD6
																						9919	CONSENSUS	1			ID	MHdis	dis		substantia_nigra_development	SEC16A
																						7407	CONSENSUS	1								VARS
																						8661	CONSENSUS	1							translational_initiation	EIF3A
																						7314	CONSENSUS	1			AD	CNSdis	dis		axon_guidance&small_GTPase_mediated_signal_transductio...&vascular_endothelial_growth_factor_recep...&activation_of_MAPKK_activity&Ras_protein_signal_transduction&neurotrophin_TRK_receptor_signaling_path...&Fc-epsilon_receptor_signaling_pathway&epidermal_growth_factor_receptor_signali...&insulin_receptor_signaling_pathway&fibroblast_growth_factor_receptor_signal...&DNA_damage_response,_signal_tra…	UBB
																						55075	CONSENSUS	1								UACA
																						5532	CONSENSUS	1		YES	MEL&SCH	MHdis	dis	Intracellular_Signal_Transduction	Fc-epsilon_receptor_signaling_pathway&stimulatory_C-type_lectin_receptor_signa...&synaptic_transmission&innate_immune_response&regulation_of_synaptic_plasticity&social_behavior	PPP3CB
																						6233	CONSENSUS	1			BI&GISC&HCC	MHdis&GIScan	disANDcan	RPSFB	axon_guidance&small_GTPase_mediated_signal_transductio...&vascular_endothelial_growth_factor_recep...&activation_of_MAPKK_activity&Ras_protein_signal_transduction&neurotrophin_TRK_receptor_signaling_path...&Fc-epsilon_receptor_signaling_pathway&epidermal_growth_factor_receptor_signali...&insulin_receptor_signaling_pathway&fibroblast_growth_factor_receptor_signal...&DNA_damage_response,_signal_tra…	RPS27A
																						7311	CONSENSUS	1							axon_guidance&small_GTPase_mediated_signal_transductio...&vascular_endothelial_growth_factor_recep...&activation_of_MAPKK_activity&Ras_protein_signal_transduction&neurotrophin_TRK_receptor_signaling_path...&Fc-epsilon_receptor_signaling_pathway&epidermal_growth_factor_receptor_signali...&insulin_receptor_signaling_pathway&fibroblast_growth_factor_receptor_signal...&DNA_damage_response,_signal_tra…	UBA52
																						9948	CONSENSUS	1			AD&SCH	CNSdis&MHdis	dis	Structural_plasticity	platelet_activation	WDR1
																						9255	CONSENSUS	1			GISC&MEL	GIScan	can			AIMP1
																						9448	CONSENSUS	1			BC&GISC&HCC	GIScan	can		negative_regulation_of_apoptotic_process	MAP4K4
																						5527	CONSENSUS	1			ASD&AUT&ID	MHdis	dis		DNA_damage_response,_signal_transduction...&intrinsic_apoptotic_signaling_pathway	PPP2R5C
																						79036	CONSENSUS	1								KXD1
																						9722	CONSENSUS	1	YES		ASD&AUT&BI&SCH	MHdis	dis			NOS1AP

## Sheet: P140Cap_synVCancer_GOBP_CONSENS
P140Cap_syn_PPI								P140Cap_Cancer_PPI
annotation 1	n1	annotation 2	n2	actual overlap	p-value	q.value	Bonferroni significance level	annotation 1	n1	annotation 2	n2	actual overlap	p-value	q.value	Bonferroni significance level
community_1	1	G2/M_transition_of_mitotic_cell_cycle	0	0	1	1		community_1	35	G2/M_transition_of_mitotic_cell_cycle	20	2	1	1
community_1	1	nuclear-transcribed_mRNA_catabolic_proce...	0	0	1	1		community_1	35	nuclear-transcribed_mRNA_catabolic_proce...	21	1	1	1
community_1	1	activation_of_MAPKK_activity	21	0	1	1		community_1	35	activation_of_MAPKK_activity	39	3	0.42867	1
community_1	1	protein_polyubiquitination	1	0	1	1		community_1	35	protein_polyubiquitination	32	0	1	1
community_1	1	stimulatory_C-type_lectin_receptor_signa...	2	0	1	1		community_1	35	stimulatory_C-type_lectin_receptor_signa...	38	2	1	1
community_1	1	antigen_processing_and_presentation_of_e...	0	0	1	1		community_1	35	antigen_processing_and_presentation_of_e...	31	0	1	1
community_1	1	translational_initiation	2	0	1	1		community_1	35	translational_initiation	25	2	1	1
community_1	1	regulation_of_cellular_amino_acid_metabo...	0	0	1	1		community_1	35	regulation_of_cellular_amino_acid_metabo...	27	0	1	1
community_1	1	SRP-dependent_cotranslational_protein_ta...	0	0	1	1		community_1	35	SRP-dependent_cotranslational_protein_ta...	18	0	1	1
community_1	1	DNA_damage_response,_signal_transduction...	1	0	1	1		community_1	35	DNA_damage_response,_signal_transduction...	32	0	1	1
community_1	1	epidermal_growth_factor_receptor_signali...	22	1	1	1		community_1	35	epidermal_growth_factor_receptor_signali...	46	4	0.494718	1
community_1	1	small_GTPase_mediated_signal_transductio...	40	0	1	1		community_1	35	small_GTPase_mediated_signal_transductio...	82	11	0.203612	1
community_1	1	Ras_protein_signal_transduction	27	0	1	1		community_1	35	Ras_protein_signal_transduction	57	6	0.471526	1
community_1	1	synaptic_transmission	52	0	1	1		community_1	35	synaptic_transmission	26	4	0.209157	1
community_1	1	neurotransmitter_secretion	13	0	1	1		community_1	35	neurotransmitter_secretion	4	1	1	1
community_1	1	axon_guidance	44	0	1	1		community_1	35	axon_guidance	59	9	0.104681	1
community_1	1	synapse_assembly	16	0	1	1		community_1	35	synapse_assembly	3	1	1	1
community_1	1	insulin_receptor_signaling_pathway	21	0	1	1		community_1	35	insulin_receptor_signaling_pathway	41	2	1	1
community_1	1	fibroblast_growth_factor_receptor_signal...	19	0	1	1		community_1	35	fibroblast_growth_factor_receptor_signal...	42	3	0.364914	1
community_1	1	proteasomal_ubiquitin-independent_protei...	0	0	1	1		community_1	35	proteasomal_ubiquitin-independent_protei...	12	0	1	1
community_1	1	viral_process	4	0	1	1		community_1	35	viral_process	83	4	0.0471931	1
community_1	1	substantia_nigra_development	2	0	1	1		community_1	35	substantia_nigra_development	11	5	0.00208695	1
community_1	1	platelet_activation	7	0	1	1		community_1	35	platelet_activation	25	7	0.00574674	1
community_1	1	anaphase-promoting_complex-dependent_pro...	0	0	1	1		community_1	35	anaphase-promoting_complex-dependent_pro...	33	1	1	1
community_1	1	tumor_necrosis_factor-mediated_signaling...	1	0	1	1		community_1	35	tumor_necrosis_factor-mediated_signaling...	32	0	1	1
community_1	1	cell_junction_assembly	21	0	1	1		community_1	35	cell_junction_assembly	24	6	0.0179774	1
community_1	1	adherens_junction_organization	14	0	1	1		community_1	35	adherens_junction_organization	16	6	0.0022405	1
community_1	1	social_behavior	8	0	1	1		community_1	35	social_behavior	2	1	1	1
community_1	1	NIK/NF-kappaB_signaling	1	0	1	1		community_1	35	NIK/NF-kappaB_signaling	32	0	1	1
community_1	1	Fc-epsilon_receptor_signaling_pathway	20	0	1	1		community_1	35	Fc-epsilon_receptor_signaling_pathway	42	3	0.364914	1
community_1	1	Fc-gamma_receptor_signaling_pathway_invo...	9	0	1	1		community_1	35	Fc-gamma_receptor_signaling_pathway_invo...	12	4	0.0201068	1
community_1	1	negative_regulation_of_epidermal_growth_...	3	0	1	1		community_1	35	negative_regulation_of_epidermal_growth_...	8	2	1	1
community_1	1	negative_regulation_of_apoptotic_process	8	0	1	1		community_1	35	negative_regulation_of_apoptotic_process	58	5	0.453749	1
community_1	1	innate_immune_response	36	1	1	1		community_1	35	innate_immune_response	67	9	0.255419	1
community_1	1	positive_regulation_of_RNA_polymerase_II...	0	0	1	1		community_1	35	positive_regulation_of_RNA_polymerase_II...	6	0	1	1
community_1	1	GMP_metabolic_process	5	0	1	1		community_1	35	GMP_metabolic_process	2	1	1	1
community_1	1	GDP_metabolic_process	5	0	1	1		community_1	35	GDP_metabolic_process	2	1	1	1
community_1	1	vascular_endothelial_growth_factor_recep...	23	0	1	1		community_1	35	vascular_endothelial_growth_factor_recep...	49	6	0.402659	1
community_1	1	neurotrophin_TRK_receptor_signaling_path...	22	0	1	1		community_1	35	neurotrophin_TRK_receptor_signaling_path...	49	5	0.632212	1
community_1	1	ephrin_receptor_signaling_pathway	17	0	1	1		community_1	35	ephrin_receptor_signaling_pathway	15	6	0.00153389	1
community_1	1	regulation_of_synaptic_plasticity	22	0	1	1		community_1	35	regulation_of_synaptic_plasticity	5	1	1	1
community_1	1	neuromuscular_process_controlling_balanc...	8	0	1	1		community_1	35	neuromuscular_process_controlling_balanc...	3	0	1	1
community_1	1	actin_filament_bundle_assembly	9	0	1	1		community_1	35	actin_filament_bundle_assembly	11	3	0.0705834	1
community_1	1	'de_novo'_posttranslational_protein_fold...	1	0	1	1		community_1	35	'de_novo'_posttranslational_protein_fold...	14	2	1	1
community_1	1	negative_regulation_of_ubiquitin-protein...	0	0	1	1		community_1	35	negative_regulation_of_ubiquitin-protein...	30	0	1	1
community_1	1	positive_regulation_of_ubiquitin-protein...	0	0	1	1		community_1	35	positive_regulation_of_ubiquitin-protein...	32	0	1	1
community_1	1	actin_filament_capping	11	0	1	1		community_1	35	actin_filament_capping	5	0	1	1
community_1	1	vocalization_behavior	7	0	1	1		community_1	35	vocalization_behavior	0	0	1	1
community_1	1	negative_regulation_of_canonical_Wnt_sig...	5	0	1	1		community_1	35	negative_regulation_of_canonical_Wnt_sig...	34	1	1	1
community_1	1	positive_regulation_of_canonical_Wnt_sig...	2	0	1	1		community_1	35	positive_regulation_of_canonical_Wnt_sig...	34	0	1	1
community_1	1	intrinsic_apoptotic_signaling_pathway	7	0	1	1		community_1	35	intrinsic_apoptotic_signaling_pathway	22	2	1	1
community_1	1	toxin_transport	1	0	1	1		community_1	35	toxin_transport	11	1	1	1
community_1	1	positive_regulation_of_excitatory_postsy...	8	0	1	1		community_1	35	positive_regulation_of_excitatory_postsy...	0	0	1	1
community_2	1	G2/M_transition_of_mitotic_cell_cycle	0	0	1	1		community_2	3	G2/M_transition_of_mitotic_cell_cycle	20	1	1	1
community_2	1	nuclear-transcribed_mRNA_catabolic_proce...	0	0	1	1		community_2	3	nuclear-transcribed_mRNA_catabolic_proce...	21	0	1	1
community_2	1	activation_of_MAPKK_activity	21	1	1	1		community_2	3	activation_of_MAPKK_activity	39	2	1	1
community_2	1	protein_polyubiquitination	1	0	1	1		community_2	3	protein_polyubiquitination	32	1	1	1
community_2	1	stimulatory_C-type_lectin_receptor_signa...	2	0	1	1		community_2	3	stimulatory_C-type_lectin_receptor_signa...	38	1	1	1
community_2	1	antigen_processing_and_presentation_of_e...	0	0	1	1		community_2	3	antigen_processing_and_presentation_of_e...	31	1	1	1
community_2	1	translational_initiation	2	0	1	1		community_2	3	translational_initiation	25	0	1	1
community_2	1	regulation_of_cellular_amino_acid_metabo...	0	0	1	1		community_2	3	regulation_of_cellular_amino_acid_metabo...	27	0	1	1
community_2	1	SRP-dependent_cotranslational_protein_ta...	0	0	1	1		community_2	3	SRP-dependent_cotranslational_protein_ta...	18	0	1	1
community_2	1	DNA_damage_response,_signal_transduction...	1	0	1	1		community_2	3	DNA_damage_response,_signal_transduction...	32	1	1	1
community_2	1	epidermal_growth_factor_receptor_signali...	22	1	1	1		community_2	3	epidermal_growth_factor_receptor_signali...	46	2	1	1
community_2	1	small_GTPase_mediated_signal_transductio...	40	1	1	1		community_2	3	small_GTPase_mediated_signal_transductio...	82	2	1	1
community_2	1	Ras_protein_signal_transduction	27	1	1	1		community_2	3	Ras_protein_signal_transduction	57	2	1	1
community_2	1	synaptic_transmission	52	0	1	1		community_2	3	synaptic_transmission	26	1	1	1
community_2	1	neurotransmitter_secretion	13	0	1	1		community_2	3	neurotransmitter_secretion	4	1	1	1
community_2	1	axon_guidance	44	1	1	1		community_2	3	axon_guidance	59	3	0.00466842	1
community_2	1	synapse_assembly	16	0	1	1		community_2	3	synapse_assembly	3	0	1	1
community_2	1	insulin_receptor_signaling_pathway	21	1	1	1		community_2	3	insulin_receptor_signaling_pathway	41	2	1	1
community_2	1	fibroblast_growth_factor_receptor_signal...	19	1	1	1		community_2	3	fibroblast_growth_factor_receptor_signal...	42	2	1	1
community_2	1	proteasomal_ubiquitin-independent_protei...	0	0	1	1		community_2	3	proteasomal_ubiquitin-independent_protei...	12	0	1	1
community_2	1	viral_process	4	0	1	1		community_2	3	viral_process	83	3	0.0131945	1
community_2	1	substantia_nigra_development	2	0	1	1		community_2	3	substantia_nigra_development	11	0	1	1
community_2	1	platelet_activation	7	0	1	1		community_2	3	platelet_activation	25	1	1	1
community_2	1	anaphase-promoting_complex-dependent_pro...	0	0	1	1		community_2	3	anaphase-promoting_complex-dependent_pro...	33	1	1	1
community_2	1	tumor_necrosis_factor-mediated_signaling...	1	0	1	1		community_2	3	tumor_necrosis_factor-mediated_signaling...	32	1	1	1
community_2	1	cell_junction_assembly	21	0	1	1		community_2	3	cell_junction_assembly	24	0	1	1
community_2	1	adherens_junction_organization	14	0	1	1		community_2	3	adherens_junction_organization	16	0	1	1
community_2	1	social_behavior	8	0	1	1		community_2	3	social_behavior	2	0	1	1
community_2	1	NIK/NF-kappaB_signaling	1	0	1	1		community_2	3	NIK/NF-kappaB_signaling	32	1	1	1
community_2	1	Fc-epsilon_receptor_signaling_pathway	20	1	1	1		community_2	3	Fc-epsilon_receptor_signaling_pathway	42	2	1	1
community_2	1	Fc-gamma_receptor_signaling_pathway_invo...	9	0	1	1		community_2	3	Fc-gamma_receptor_signaling_pathway_invo...	12	1	1	1
community_2	1	negative_regulation_of_epidermal_growth_...	3	0	1	1		community_2	3	negative_regulation_of_epidermal_growth_...	8	2	1	1
community_2	1	negative_regulation_of_apoptotic_process	8	0	1	1		community_2	3	negative_regulation_of_apoptotic_process	58	1	1	1
community_2	1	innate_immune_response	36	1	1	1		community_2	3	innate_immune_response	67	2	1	1
community_2	1	positive_regulation_of_RNA_polymerase_II...	0	0	1	1		community_2	3	positive_regulation_of_RNA_polymerase_II...	6	0	1	1
community_2	1	GMP_metabolic_process	5	0	1	1		community_2	3	GMP_metabolic_process	2	0	1	1
community_2	1	GDP_metabolic_process	5	0	1	1		community_2	3	GDP_metabolic_process	2	0	1	1
community_2	1	vascular_endothelial_growth_factor_recep...	23	1	1	1		community_2	3	vascular_endothelial_growth_factor_recep...	49	2	1	1
community_2	1	neurotrophin_TRK_receptor_signaling_path...	22	1	1	1		community_2	3	neurotrophin_TRK_receptor_signaling_path...	49	2	1	1
community_2	1	ephrin_receptor_signaling_pathway	17	0	1	1		community_2	3	ephrin_receptor_signaling_pathway	15	0	1	1
community_2	1	regulation_of_synaptic_plasticity	22	0	1	1		community_2	3	regulation_of_synaptic_plasticity	5	0	1	1
community_2	1	neuromuscular_process_controlling_balanc...	8	0	1	1		community_2	3	neuromuscular_process_controlling_balanc...	3	0	1	1
community_2	1	actin_filament_bundle_assembly	9	0	1	1		community_2	3	actin_filament_bundle_assembly	11	0	1	1
community_2	1	'de_novo'_posttranslational_protein_fold...	1	0	1	1		community_2	3	'de_novo'_posttranslational_protein_fold...	14	1	1	1
community_2	1	negative_regulation_of_ubiquitin-protein...	0	0	1	1		community_2	3	negative_regulation_of_ubiquitin-protein...	30	1	1	1
community_2	1	positive_regulation_of_ubiquitin-protein...	0	0	1	1		community_2	3	positive_regulation_of_ubiquitin-protein...	32	1	1	1
community_2	1	actin_filament_capping	11	1	1	1		community_2	3	actin_filament_capping	5	0	1	1
community_2	1	vocalization_behavior	7	0	1	1		community_2	3	vocalization_behavior	0	0	1	1
community_2	1	negative_regulation_of_canonical_Wnt_sig...	5	0	1	1		community_2	3	negative_regulation_of_canonical_Wnt_sig...	34	1	1	1
community_2	1	positive_regulation_of_canonical_Wnt_sig...	2	0	1	1		community_2	3	positive_regulation_of_canonical_Wnt_sig...	34	1	1	1
community_2	1	intrinsic_apoptotic_signaling_pathway	7	0	1	1		community_2	3	intrinsic_apoptotic_signaling_pathway	22	0	1	1
community_2	1	toxin_transport	1	0	1	1		community_2	3	toxin_transport	11	0	1	1
community_2	1	positive_regulation_of_excitatory_postsy...	8	0	1	1		community_2	3	positive_regulation_of_excitatory_postsy...	0	0	1	1
community_3	77	G2/M_transition_of_mitotic_cell_cycle	0	0	1	1		community_3	216	G2/M_transition_of_mitotic_cell_cycle	20	15	0.178396	1
community_3	77	nuclear-transcribed_mRNA_catabolic_proce...	0	0	1	1		community_3	216	nuclear-transcribed_mRNA_catabolic_proce...	21	15	0.362814	1
community_3	77	activation_of_MAPKK_activity	21	10	0.232098	1		community_3	216	activation_of_MAPKK_activity	39	26	0.389332	1
community_3	77	protein_polyubiquitination	1	0	1	1		community_3	216	protein_polyubiquitination	32	23	0.177131	1
community_3	77	stimulatory_C-type_lectin_receptor_signa...	2	1	1	1		community_3	216	stimulatory_C-type_lectin_receptor_signa...	38	26	0.328882	1
community_3	77	antigen_processing_and_presentation_of_e...	0	0	1	1		community_3	216	antigen_processing_and_presentation_of_e...	31	22	0.234246	1
community_3	77	translational_initiation	2	1	1	1		community_3	216	translational_initiation	25	16	0.657942	1
community_3	77	regulation_of_cellular_amino_acid_metabo...	0	0	1	1		community_3	216	regulation_of_cellular_amino_acid_metabo...	27	19	0.285828	1
community_3	77	SRP-dependent_cotranslational_protein_ta...	0	0	1	1		community_3	216	SRP-dependent_cotranslational_protein_ta...	18	13	0.337586	1
community_3	77	DNA_damage_response,_signal_transduction...	1	0	1	1		community_3	216	DNA_damage_response,_signal_transduction...	32	23	0.177131	1
community_3	77	epidermal_growth_factor_receptor_signali...	22	12	0.0776469	1		community_3	216	epidermal_growth_factor_receptor_signali...	46	32	0.230509	1
community_3	77	small_GTPase_mediated_signal_transductio...	40	19	0.139852	1		community_3	216	small_GTPase_mediated_signal_transductio...	82	54	0.263706	1
community_3	77	Ras_protein_signal_transduction	27	12	0.347508	1		community_3	216	Ras_protein_signal_transduction	57	36	0.510695	1
community_3	77	synaptic_transmission	52	27	0.0149384	1		community_3	216	synaptic_transmission	26	14	0.24354	1
community_3	77	neurotransmitter_secretion	13	6	0.382227	1		community_3	216	neurotransmitter_secretion	4	2	1	1
community_3	77	axon_guidance	44	19	0.30897	1		community_3	216	axon_guidance	59	38	0.476934	1
community_3	77	synapse_assembly	16	9	0.14164	1		community_3	216	synapse_assembly	3	1	1	1
community_3	77	insulin_receptor_signaling_pathway	21	10	0.232098	1		community_3	216	insulin_receptor_signaling_pathway	41	28	0.345832	1
community_3	77	fibroblast_growth_factor_receptor_signal...	19	10	0.160051	1		community_3	216	fibroblast_growth_factor_receptor_signal...	42	29	0.275757	1
community_3	77	proteasomal_ubiquitin-independent_protei...	0	0	1	1		community_3	216	proteasomal_ubiquitin-independent_protei...	12	8	0.732091	1
community_3	77	viral_process	4	1	1	1		community_3	216	viral_process	83	55	0.286068	1
community_3	77	substantia_nigra_development	2	1	1	1		community_3	216	substantia_nigra_development	11	6	0.409476	1
community_3	77	platelet_activation	7	5	0.0954857	1		community_3	216	platelet_activation	25	13	0.193133	1
community_3	77	anaphase-promoting_complex-dependent_pro...	0	0	1	1		community_3	216	anaphase-promoting_complex-dependent_pro...	33	22	0.481389	1
community_3	77	tumor_necrosis_factor-mediated_signaling...	1	1	1	1		community_3	216	tumor_necrosis_factor-mediated_signaling...	32	22	0.29461	1
community_3	77	cell_junction_assembly	21	14	0.00658217	1		community_3	216	cell_junction_assembly	24	13	0.268485	1
community_3	77	adherens_junction_organization	14	10	0.0089731	1		community_3	216	adherens_junction_organization	16	7	0.101247	1
community_3	77	social_behavior	8	7	0.00519661	1		community_3	216	social_behavior	2	1	1	1
community_3	77	NIK/NF-kappaB_signaling	1	1	1	1		community_3	216	NIK/NF-kappaB_signaling	32	22	0.29461	1
community_3	77	Fc-epsilon_receptor_signaling_pathway	20	9	0.443149	1		community_3	216	Fc-epsilon_receptor_signaling_pathway	42	28	0.405829	1
community_3	77	Fc-gamma_receptor_signaling_pathway_invo...	9	4	0.507014	1		community_3	216	Fc-gamma_receptor_signaling_pathway_invo...	12	7	0.503009	1
community_3	77	negative_regulation_of_epidermal_growth_...	3	2	1	1		community_3	216	negative_regulation_of_epidermal_growth_...	8	4	0.357232	1
community_3	77	negative_regulation_of_apoptotic_process	8	5	0.226975	1		community_3	216	negative_regulation_of_apoptotic_process	58	42	0.0524851	1
community_3	77	innate_immune_response	36	16	0.298373	1		community_3	216	innate_immune_response	67	46	0.179399	1
community_3	77	positive_regulation_of_RNA_polymerase_II...	0	0	1	1		community_3	216	positive_regulation_of_RNA_polymerase_II...	6	4	0.735354	1
community_3	77	GMP_metabolic_process	5	4	0.0645325	1		community_3	216	GMP_metabolic_process	2	0	1	1
community_3	77	GDP_metabolic_process	5	4	0.0645325	1		community_3	216	GDP_metabolic_process	2	0	1	1
community_3	77	vascular_endothelial_growth_factor_recep...	23	14	0.0175919	1		community_3	216	vascular_endothelial_growth_factor_recep...	49	33	0.26908	1
community_3	77	neurotrophin_TRK_receptor_signaling_path...	22	10	0.324383	1		community_3	216	neurotrophin_TRK_receptor_signaling_path...	49	33	0.26908	1
community_3	77	ephrin_receptor_signaling_pathway	17	9	0.142522	1		community_3	216	ephrin_receptor_signaling_pathway	15	9	0.532726	1
community_3	77	regulation_of_synaptic_plasticity	22	13	0.0288453	1		community_3	216	regulation_of_synaptic_plasticity	5	4	0.562929	1
community_3	77	neuromuscular_process_controlling_balanc...	8	5	0.226975	1		community_3	216	neuromuscular_process_controlling_balanc...	3	1	1	1
community_3	77	actin_filament_bundle_assembly	9	7	0.0264342	1		community_3	216	actin_filament_bundle_assembly	11	5	0.199339	1
community_3	77	'de_novo'_posttranslational_protein_fold...	1	1	1	1		community_3	216	'de_novo'_posttranslational_protein_fold...	14	11	0.213297	1
community_3	77	negative_regulation_of_ubiquitin-protein...	0	0	1	1		community_3	216	negative_regulation_of_ubiquitin-protein...	30	22	0.177682	1
community_3	77	positive_regulation_of_ubiquitin-protein...	0	0	1	1		community_3	216	positive_regulation_of_ubiquitin-protein...	32	22	0.29461	1
community_3	77	actin_filament_capping	11	6	0.266077	1		community_3	216	actin_filament_capping	5	3	0.627746	1
community_3	77	vocalization_behavior	7	6	0.0124243	1		community_3	216	vocalization_behavior	0	0	1	1
community_3	77	negative_regulation_of_canonical_Wnt_sig...	5	3	0.301112	1		community_3	216	negative_regulation_of_canonical_Wnt_sig...	34	24	0.25172	1
community_3	77	positive_regulation_of_canonical_Wnt_sig...	2	2	1	1		community_3	216	positive_regulation_of_canonical_Wnt_sig...	34	25	0.144574	1
community_3	77	intrinsic_apoptotic_signaling_pathway	7	3	0.745527	1		community_3	216	intrinsic_apoptotic_signaling_pathway	22	15	0.449846	1
community_3	77	toxin_transport	1	0	1	1		community_3	216	toxin_transport	11	9	0.179251	1
community_3	77	positive_regulation_of_excitatory_postsy...	8	8	0.000366696	1		community_3	216	positive_regulation_of_excitatory_postsy...	0	0	1	1
community_4	6	G2/M_transition_of_mitotic_cell_cycle	0	0	1	1		community_4	4	G2/M_transition_of_mitotic_cell_cycle	20	1	1	1
community_4	6	nuclear-transcribed_mRNA_catabolic_proce...	0	0	1	1		community_4	4	nuclear-transcribed_mRNA_catabolic_proce...	21	0	1	1
community_4	6	activation_of_MAPKK_activity	21	0	1	1		community_4	4	activation_of_MAPKK_activity	39	1	1	1
community_4	6	protein_polyubiquitination	1	0	1	1		community_4	4	protein_polyubiquitination	32	1	1	1
community_4	6	stimulatory_C-type_lectin_receptor_signa...	2	0	1	1		community_4	4	stimulatory_C-type_lectin_receptor_signa...	38	2	1	1
community_4	6	antigen_processing_and_presentation_of_e...	0	0	1	1		community_4	4	antigen_processing_and_presentation_of_e...	31	1	1	1
community_4	6	translational_initiation	2	1	1	1		community_4	4	translational_initiation	25	0	1	1
community_4	6	regulation_of_cellular_amino_acid_metabo...	0	0	1	1		community_4	4	regulation_of_cellular_amino_acid_metabo...	27	1	1	1
community_4	6	SRP-dependent_cotranslational_protein_ta...	0	0	1	1		community_4	4	SRP-dependent_cotranslational_protein_ta...	18	0	1	1
community_4	6	DNA_damage_response,_signal_transduction...	1	0	1	1		community_4	4	DNA_damage_response,_signal_transduction...	32	1	1	1
community_4	6	epidermal_growth_factor_receptor_signali...	22	0	1	1		community_4	4	epidermal_growth_factor_receptor_signali...	46	1	1	1
community_4	6	small_GTPase_mediated_signal_transductio...	40	1	1	1		community_4	4	small_GTPase_mediated_signal_transductio...	82	1	1	1
community_4	6	Ras_protein_signal_transduction	27	0	1	1		community_4	4	Ras_protein_signal_transduction	57	1	1	1
community_4	6	synaptic_transmission	52	1	1	1		community_4	4	synaptic_transmission	26	0	1	1
community_4	6	neurotransmitter_secretion	13	0	1	1		community_4	4	neurotransmitter_secretion	4	0	1	1
community_4	6	axon_guidance	44	1	1	1		community_4	4	axon_guidance	59	1	1	1
community_4	6	synapse_assembly	16	0	1	1		community_4	4	synapse_assembly	3	0	1	1
community_4	6	insulin_receptor_signaling_pathway	21	0	1	1		community_4	4	insulin_receptor_signaling_pathway	41	1	1	1
community_4	6	fibroblast_growth_factor_receptor_signal...	19	0	1	1		community_4	4	fibroblast_growth_factor_receptor_signal...	42	1	1	1
community_4	6	proteasomal_ubiquitin-independent_protei...	0	0	1	1		community_4	4	proteasomal_ubiquitin-independent_protei...	12	1	1	1
community_4	6	viral_process	4	0	1	1		community_4	4	viral_process	83	4	0.00305959	1
community_4	6	substantia_nigra_development	2	0	1	1		community_4	4	substantia_nigra_development	11	0	1	1
community_4	6	platelet_activation	7	0	1	1		community_4	4	platelet_activation	25	0	1	1
community_4	6	anaphase-promoting_complex-dependent_pro...	0	0	1	1		community_4	4	anaphase-promoting_complex-dependent_pro...	33	2	1	1
community_4	6	tumor_necrosis_factor-mediated_signaling...	1	0	1	1		community_4	4	tumor_necrosis_factor-mediated_signaling...	32	2	1	1
community_4	6	cell_junction_assembly	21	0	1	1		community_4	4	cell_junction_assembly	24	0	1	1
community_4	6	adherens_junction_organization	14	0	1	1		community_4	4	adherens_junction_organization	16	0	1	1
community_4	6	social_behavior	8	0	1	1		community_4	4	social_behavior	2	0	1	1
community_4	6	NIK/NF-kappaB_signaling	1	0	1	1		community_4	4	NIK/NF-kappaB_signaling	32	2	1	1
community_4	6	Fc-epsilon_receptor_signaling_pathway	20	0	1	1		community_4	4	Fc-epsilon_receptor_signaling_pathway	42	2	1	1
community_4	6	Fc-gamma_receptor_signaling_pathway_invo...	9	1	1	1		community_4	4	Fc-gamma_receptor_signaling_pathway_invo...	12	0	1	1
community_4	6	negative_regulation_of_epidermal_growth_...	3	0	1	1		community_4	4	negative_regulation_of_epidermal_growth_...	8	0	1	1
community_4	6	negative_regulation_of_apoptotic_process	8	1	1	1		community_4	4	negative_regulation_of_apoptotic_process	58	1	1	1
community_4	6	innate_immune_response	36	2	1	1		community_4	4	innate_immune_response	67	2	1	1
community_4	6	positive_regulation_of_RNA_polymerase_II...	0	0	1	1		community_4	4	positive_regulation_of_RNA_polymerase_II...	6	0	1	1
community_4	6	GMP_metabolic_process	5	0	1	1		community_4	4	GMP_metabolic_process	2	0	1	1
community_4	6	GDP_metabolic_process	5	0	1	1		community_4	4	GDP_metabolic_process	2	0	1	1
community_4	6	vascular_endothelial_growth_factor_recep...	23	0	1	1		community_4	4	vascular_endothelial_growth_factor_recep...	49	1	1	1
community_4	6	neurotrophin_TRK_receptor_signaling_path...	22	0	1	1		community_4	4	neurotrophin_TRK_receptor_signaling_path...	49	1	1	1
community_4	6	ephrin_receptor_signaling_pathway	17	1	1	1		community_4	4	ephrin_receptor_signaling_pathway	15	0	1	1
community_4	6	regulation_of_synaptic_plasticity	22	1	1	1		community_4	4	regulation_of_synaptic_plasticity	5	0	1	1
community_4	6	neuromuscular_process_controlling_balanc...	8	0	1	1		community_4	4	neuromuscular_process_controlling_balanc...	3	0	1	1
community_4	6	actin_filament_bundle_assembly	9	1	1	1		community_4	4	actin_filament_bundle_assembly	11	0	1	1
community_4	6	'de_novo'_posttranslational_protein_fold...	1	0	1	1		community_4	4	'de_novo'_posttranslational_protein_fold...	14	0	1	1
community_4	6	negative_regulation_of_ubiquitin-protein...	0	0	1	1		community_4	4	negative_regulation_of_ubiquitin-protein...	30	1	1	1
community_4	6	positive_regulation_of_ubiquitin-protein...	0	0	1	1		community_4	4	positive_regulation_of_ubiquitin-protein...	32	2	1	1
community_4	6	actin_filament_capping	11	1	1	1		community_4	4	actin_filament_capping	5	0	1	1
community_4	6	vocalization_behavior	7	0	1	1		community_4	4	vocalization_behavior	0	0	1	1
community_4	6	negative_regulation_of_canonical_Wnt_sig...	5	0	1	1		community_4	4	negative_regulation_of_canonical_Wnt_sig...	34	1	1	1
community_4	6	positive_regulation_of_canonical_Wnt_sig...	2	0	1	1		community_4	4	positive_regulation_of_canonical_Wnt_sig...	34	1	1	1
community_4	6	intrinsic_apoptotic_signaling_pathway	7	0	1	1		community_4	4	intrinsic_apoptotic_signaling_pathway	22	3	0.000835883	1
community_4	6	toxin_transport	1	0	1	1		community_4	4	toxin_transport	11	0	1	1
community_4	6	positive_regulation_of_excitatory_postsy...	8	0	1	1		community_4	4	positive_regulation_of_excitatory_postsy...	0	0	1	1

## Sheet: P140Cap_synVCancer_HDOgroup1_CO
P140Cap_syn_PPI								P140Cap_Cancer_PPI
annotation 1	n1	annotation 2	n2	actual overlap	p-value	q.value	Bonferroni significance level	annotation 1	n1	annotation 2	n2	actual overlap	p-value	q.value	Bonferroni significance level
community_1	1	autism_spectrum_disorder	23	0	1	1		community_1	35	autism_spectrum_disorder	10	1	1	1
community_1	1	stomach_cancer	3	0	1	1		community_1	35	stomach_cancer	21	6	0.00958497	1
community_1	1	gastric_lymphoma	0	0	1	1		community_1	35	gastric_lymphoma	1	0	1	1
community_1	1	intellectual_disability	28	0	1	1		community_1	35	intellectual_disability	15	2	1	1
community_1	1	Alzheimer's_disease	38	0	1	1		community_1	35	Alzheimer's_disease	44	5	0.517603	1
community_1	1	peripheral_nervous_system_neoplasm	9	0	1	1		community_1	35	peripheral_nervous_system_neoplasm	17	3	0.316787	1
community_1	1	autistic_disorder	23	0	1	1		community_1	35	autistic_disorder	10	1	1	1
community_1	1	Huntington's_disease	4	0	1	1		community_1	35	Huntington's_disease	5	1	1	1
community_1	1	Parkinson's_disease	13	0	1	1		community_1	35	Parkinson's_disease	28	3	0.446066	1
community_1	1	epilepsy_syndrome	21	0	1	1		community_1	35	epilepsy_syndrome	18	4	0.0692197	1
community_1	1	autonomic_nervous_system_neoplasm	8	0	1	1		community_1	35	autonomic_nervous_system_neoplasm	14	3	0.115325	1
community_1	1	malignant_glioma	17	0	1	1		community_1	35	malignant_glioma	43	10	0.00387068	1
community_1	1	nervous_system_cancer	20	0	1	1		community_1	35	nervous_system_cancer	42	8	0.0376966	1
community_1	1	gastrointestinal_system_cancer	50	1	1	1		community_1	35	gastrointestinal_system_cancer	125	23	0.000245502	0.248471	*
community_1	1	bipolar_disorder	26	0	1	1		community_1	35	bipolar_disorder	17	4	0.0594008	1
community_1	1	central_nervous_system_cancer	10	0	1	1		community_1	35	central_nervous_system_cancer	22	5	0.0419662	1
community_1	1	gastric_adenocarcinoma	1	0	1	1		community_1	35	gastric_adenocarcinoma	7	0	1	1
community_1	1	schizophrenia	64	0	1	1		community_1	35	schizophrenia	54	10	0.0346645	1
community_1	1	stomach_carcinoma	2	0	1	1		community_1	35	stomach_carcinoma	18	5	0.0200276	1
community_1	1	gastric_cardia_carcinoma	0	0	1	1		community_1	35	gastric_cardia_carcinoma	1	0	1	1
community_1	1	neuroblastoma	8	0	1	1		community_1	35	neuroblastoma	14	3	0.115325	1
community_1	1	frontotemporal_dementia	8	0	1	1		community_1	35	frontotemporal_dementia	11	1	1	1
community_2	1	autism_spectrum_disorder	23	0	1	1		community_2	3	autism_spectrum_disorder	10	0	1	1
community_2	1	stomach_cancer	3	0	1	1		community_2	3	stomach_cancer	21	0	1	1
community_2	1	gastric_lymphoma	0	0	1	1		community_2	3	gastric_lymphoma	1	0	1	1
community_2	1	intellectual_disability	28	1	1	1		community_2	3	intellectual_disability	15	0	1	1
community_2	1	Alzheimer's_disease	38	0	1	1		community_2	3	Alzheimer's_disease	44	1	1	1
community_2	1	peripheral_nervous_system_neoplasm	9	0	1	1		community_2	3	peripheral_nervous_system_neoplasm	17	0	1	1
community_2	1	autistic_disorder	23	0	1	1		community_2	3	autistic_disorder	10	0	1	1
community_2	1	Huntington's_disease	4	0	1	1		community_2	3	Huntington's_disease	5	0	1	1
community_2	1	Parkinson's_disease	13	0	1	1		community_2	3	Parkinson's_disease	28	1	1	1
community_2	1	epilepsy_syndrome	21	1	1	1		community_2	3	epilepsy_syndrome	18	1	1	1
community_2	1	autonomic_nervous_system_neoplasm	8	0	1	1		community_2	3	autonomic_nervous_system_neoplasm	14	0	1	1
community_2	1	malignant_glioma	17	0	1	1		community_2	3	malignant_glioma	43	1	1	1
community_2	1	nervous_system_cancer	20	0	1	1		community_2	3	nervous_system_cancer	42	0	1	1
community_2	1	gastrointestinal_system_cancer	50	1	1	1		community_2	3	gastrointestinal_system_cancer	125	2	1	1
community_2	1	bipolar_disorder	26	0	1	1		community_2	3	bipolar_disorder	17	0	1	1
community_2	1	central_nervous_system_cancer	10	0	1	1		community_2	3	central_nervous_system_cancer	22	0	1	1
community_2	1	gastric_adenocarcinoma	1	0	1	1		community_2	3	gastric_adenocarcinoma	7	0	1	1
community_2	1	schizophrenia	64	1	1	1		community_2	3	schizophrenia	54	2	1	1
community_2	1	stomach_carcinoma	2	0	1	1		community_2	3	stomach_carcinoma	18	0	1	1
community_2	1	gastric_cardia_carcinoma	0	0	1	1		community_2	3	gastric_cardia_carcinoma	1	0	1	1
community_2	1	neuroblastoma	8	0	1	1		community_2	3	neuroblastoma	14	0	1	1
community_2	1	frontotemporal_dementia	8	0	1	1		community_2	3	frontotemporal_dementia	11	0	1	1
community_3	77	autism_spectrum_disorder	23	11	0.253889	1		community_3	216	autism_spectrum_disorder	10	8	0.271803	1
community_3	77	stomach_cancer	3	2	1	1		community_3	216	stomach_cancer	21	11	0.236073	1
community_3	77	gastric_lymphoma	0	0	1	1		community_3	216	gastric_lymphoma	1	0	1	1
community_3	77	intellectual_disability	28	15	0.0696516	1		community_3	216	intellectual_disability	15	10	0.528133	1
community_3	77	Alzheimer's_disease	38	16	0.350269	1		community_3	216	Alzheimer's_disease	44	28	0.519674	1
community_3	77	peripheral_nervous_system_neoplasm	9	6	0.0712838	1		community_3	216	peripheral_nervous_system_neoplasm	17	11	0.680549	1
community_3	77	autistic_disorder	23	11	0.253889	1		community_3	216	autistic_disorder	10	8	0.271803	1
community_3	77	Huntington's_disease	4	3	0.137437	1		community_3	216	Huntington's_disease	5	4	0.562929	1
community_3	77	Parkinson's_disease	13	8	0.0646059	1		community_3	216	Parkinson's_disease	28	17	0.513942	1
community_3	77	epilepsy_syndrome	21	9	0.40078	1		community_3	216	epilepsy_syndrome	18	11	0.557496	1
community_3	77	autonomic_nervous_system_neoplasm	8	5	0.226975	1		community_3	216	autonomic_nervous_system_neoplasm	14	9	0.668545	1
community_3	77	malignant_glioma	17	8	0.295843	1		community_3	216	malignant_glioma	43	24	0.229847	1
community_3	77	nervous_system_cancer	20	9	0.443149	1		community_3	216	nervous_system_cancer	42	27	0.548899	1
community_3	77	gastrointestinal_system_cancer	50	24	0.0935789	1		community_3	216	gastrointestinal_system_cancer	125	79	0.487475	1
community_3	77	bipolar_disorder	26	10	0.596698	1		community_3	216	bipolar_disorder	17	7	0.0608067	1
community_3	77	central_nervous_system_cancer	10	5	0.377774	1		community_3	216	central_nervous_system_cancer	22	15	0.449846	1
community_3	77	gastric_adenocarcinoma	1	1	1	1		community_3	216	gastric_adenocarcinoma	7	6	0.225923	1
community_3	77	schizophrenia	64	32	0.0220786	1		community_3	216	schizophrenia	54	34	0.614752	1
community_3	77	stomach_carcinoma	2	1	1	1		community_3	216	stomach_carcinoma	18	10	0.363011	1
community_3	77	gastric_cardia_carcinoma	0	0	1	1		community_3	216	gastric_cardia_carcinoma	1	1	1	1
community_3	77	neuroblastoma	8	5	0.226975	1		community_3	216	neuroblastoma	14	9	0.668545	1
community_3	77	frontotemporal_dementia	8	2	1	1		community_3	216	frontotemporal_dementia	11	10	0.0527877	1
community_4	6	autism_spectrum_disorder	23	0	1	1		community_4	4	autism_spectrum_disorder	10	0	1	1
community_4	6	stomach_cancer	3	0	1	1		community_4	4	stomach_cancer	21	0	1	1
community_4	6	gastric_lymphoma	0	0	1	1		community_4	4	gastric_lymphoma	1	0	1	1
community_4	6	intellectual_disability	28	1	1	1		community_4	4	intellectual_disability	15	0	1	1
community_4	6	Alzheimer's_disease	38	1	1	1		community_4	4	Alzheimer's_disease	44	0	1	1
community_4	6	peripheral_nervous_system_neoplasm	9	0	1	1		community_4	4	peripheral_nervous_system_neoplasm	17	0	1	1
community_4	6	autistic_disorder	23	0	1	1		community_4	4	autistic_disorder	10	0	1	1
community_4	6	Huntington's_disease	4	0	1	1		community_4	4	Huntington's_disease	5	0	1	1
community_4	6	Parkinson's_disease	13	0	1	1		community_4	4	Parkinson's_disease	28	0	1	1
community_4	6	epilepsy_syndrome	21	0	1	1		community_4	4	epilepsy_syndrome	18	0	1	1
community_4	6	autonomic_nervous_system_neoplasm	8	0	1	1		community_4	4	autonomic_nervous_system_neoplasm	14	0	1	1
community_4	6	malignant_glioma	17	1	1	1		community_4	4	malignant_glioma	43	1	1	1
community_4	6	nervous_system_cancer	20	1	1	1		community_4	4	nervous_system_cancer	42	0	1	1
community_4	6	gastrointestinal_system_cancer	50	4	0.0307042	1		community_4	4	gastrointestinal_system_cancer	125	1	1	1
community_4	6	bipolar_disorder	26	0	1	1		community_4	4	bipolar_disorder	17	0	1	1
community_4	6	central_nervous_system_cancer	10	0	1	1		community_4	4	central_nervous_system_cancer	22	0	1	1
community_4	6	gastric_adenocarcinoma	1	0	1	1		community_4	4	gastric_adenocarcinoma	7	0	1	1
community_4	6	schizophrenia	64	1	1	1		community_4	4	schizophrenia	54	0	1	1
community_4	6	stomach_carcinoma	2	0	1	1		community_4	4	stomach_carcinoma	18	0	1	1
community_4	6	gastric_cardia_carcinoma	0	0	1	1		community_4	4	gastric_cardia_carcinoma	1	0	1	1
community_4	6	neuroblastoma	8	0	1	1		community_4	4	neuroblastoma	14	0	1	1
community_4	6	frontotemporal_dementia	8	0	1	1		community_4	4	frontotemporal_dementia	11	0	1	1

## Sheet: P140Cap_synVCancer_HDOgroup2_CO
P140Cap_syn_PPI								P140Cap_Cancer_PPI
annotation 1	n1	annotation 2	n2	actual overlap	p-value	q.value	Bonferroni significance level	annotation 1	n1	annotation 2	n2	actual overlap	p-value	q.value	Bonferroni significance level
community_1	1	CNSdis	62	0	1	1		community_1	35	CNSdis	83	10	0.348501	1
community_1	1	MHdis	84	0	1	1		community_1	35	MHdis	81	15	0.00438115	0.284494
community_1	1	CNScan	30	0	1	1		community_1	35	CNScan	69	13	0.0092846	0.401936
community_1	1	GIScan	50	1	1	1		community_1	35	GIScan	125	23	0.000245502	0.0318838	**
community_2	1	CNSdis	62	1	1	1		community_2	3	CNSdis	83	2	1	1
community_2	1	MHdis	84	1	1	1		community_2	3	MHdis	81	2	1	1
community_2	1	CNScan	30	0	1	1		community_2	3	CNScan	69	1	1	1
community_2	1	GIScan	50	1	1	1		community_2	3	GIScan	125	2	1	1
community_3	77	CNSdis	62	24	0.594645	1		community_3	216	CNSdis	83	54	0.383931	1
community_3	77	MHdis	84	40	0.0200298	0.650327		community_3	216	MHdis	81	49	0.417566	1
community_3	77	CNScan	30	13	0.341665	1		community_3	216	CNScan	69	42	0.461198	1
community_3	77	GIScan	50	24	0.0935789	1		community_3	216	GIScan	125	79	0.487475	1
community_4	6	CNSdis	62	1	1	1		community_4	4	CNSdis	83	0	1	1
community_4	6	MHdis	84	1	1	1		community_4	4	MHdis	81	0	1	1
community_4	6	CNScan	30	2	1	1		community_4	4	CNScan	69	1	1	1
community_4	6	GIScan	50	4	0.0307042	0.797522		community_4	4	GIScan	125	1	1	1

## Sheet: P140Cap_synVCancer_HDOgroup3_CO
P140Cap_syn_PPI								P140Cap_Cancer_PPI
annotation 1	n1	annotation 2	n2	actual overlap	p-value	q.value	Bonferroni significance level	annotation 1	n1	annotation 2	n2	actual overlap	p-value	q.value	Bonferroni significance level
community_1	1	dis	73	0	1	1		community_1	35	dis	60	4	0.241197	1
community_1	1	can	25	1	1	1		community_1	35	can	71	9	0.236067	1
community_1	1	disANDcan	38	0	1	1		community_1	35	disANDcan	72	15	0.00122216	0.110756	*
community_2	1	dis	73	0	1	1		community_2	3	dis	60	1	1	1
community_2	1	can	25	0	1	1		community_2	3	can	71	0	1	1
community_2	1	disANDcan	38	1	1	1		community_2	3	disANDcan	72	2	1	1
community_3	77	dis	73	27	0.44549	1		community_3	216	dis	60	37	0.527036	1
community_3	77	can	25	11	0.462729	1		community_3	216	can	71	44	0.54442	1
community_3	77	disANDcan	38	19	0.102888	1		community_3	216	disANDcan	72	46	0.473115	1
community_4	6	dis	73	1	1	1		community_4	4	dis	60	0	1	1
community_4	6	can	25	3	0.0241848	1		community_4	4	can	71	2	1	1
community_4	6	disANDcan	38	1	1	1		community_4	4	disANDcan	72	0	1	1

## Sheet: P140Cap_synVCancer_HDOgroup1VGO
P140Cap_syn_PPI																																	P140Cap_Cancer_PPI
Region1								Region2								Region3								Region4									Region1								Region2								Region3
annotation 1	n1	annotation 2	n2	actual overlap	p-value	q.value	Bonferroni significance level	annotation 1	n1	annotation 2	n2	actual overlap	p-value	q.value	Bonferroni significance level	annotation 1	n1	annotation 2	n2	actual overlap	p-value	q.value	Bonferroni significance level	annotation 1	n1	annotation 2	n2	actual overlap	p-value	q.value	Bonferroni significance level		annotation 1	n1	annotation 2	n2	actual overlap	p-value	q.value	Bonferroni significance level	annotation 1	n1	annotation 2	n2	actual overlap	p-value	q.value	Bonferroni significance level	annotation 1
autism_spectrum_disorder	0	G2/M_transition_of_mitotic_cell_cycle	0	0	1	1		autism_spectrum_disorder	0	G2/M_transition_of_mitotic_cell_cycle	0	0	1	1		autism_spectrum_disorder	11	G2/M_transition_of_mitotic_cell_cycle	0	0	1	1		autism_spectrum_disorder	0	G2/M_transition_of_mitotic_cell_cycle	0	0	1	1			autism_spectrum_disorder	1	G2/M_transition_of_mitotic_cell_cycle	2	0	1	1		autism_spectrum_disorder	0	G2/M_transition_of_mitotic_cell_cycle	1	0	1	1		autism_spectrum_disorder
autism_spectrum_disorder	0	nuclear-transcribed_mRNA_catabolic_proce...	0	0	1	1		autism_spectrum_disorder	0	nuclear-transcribed_mRNA_catabolic_proce...	0	0	1	1		autism_spectrum_disorder	11	nuclear-transcribed_mRNA_catabolic_proce...	0	0	1	1		autism_spectrum_disorder	0	nuclear-transcribed_mRNA_catabolic_proce...	0	0	1	1			autism_spectrum_disorder	1	nuclear-transcribed_mRNA_catabolic_proce...	1	0	1	1		autism_spectrum_disorder	0	nuclear-transcribed_mRNA_catabolic_proce...	0	0	1	1		autism_spectrum_disorder
autism_spectrum_disorder	0	activation_of_MAPKK_activity	0	0	1	1		autism_spectrum_disorder	0	activation_of_MAPKK_activity	1	0	1	1		autism_spectrum_disorder	11	activation_of_MAPKK_activity	10	2	1	1		autism_spectrum_disorder	0	activation_of_MAPKK_activity	0	0	1	1			autism_spectrum_disorder	1	activation_of_MAPKK_activity	3	0	1	1		autism_spectrum_disorder	0	activation_of_MAPKK_activity	2	0	1	1		autism_spectrum_disorder
autism_spectrum_disorder	0	protein_polyubiquitination	0	0	1	1		autism_spectrum_disorder	0	protein_polyubiquitination	0	0	1	1		autism_spectrum_disorder	11	protein_polyubiquitination	0	0	1	1		autism_spectrum_disorder	0	protein_polyubiquitination	0	0	1	1			autism_spectrum_disorder	1	protein_polyubiquitination	0	0	1	1		autism_spectrum_disorder	0	protein_polyubiquitination	1	0	1	1		autism_spectrum_disorder
autism_spectrum_disorder	0	stimulatory_C-type_lectin_receptor_signa...	0	0	1	1		autism_spectrum_disorder	0	stimulatory_C-type_lectin_receptor_signa...	0	0	1	1		autism_spectrum_disorder	11	stimulatory_C-type_lectin_receptor_signa...	1	0	1	1		autism_spectrum_disorder	0	stimulatory_C-type_lectin_receptor_signa...	0	0	1	1			autism_spectrum_disorder	1	stimulatory_C-type_lectin_receptor_signa...	2	0	1	1		autism_spectrum_disorder	0	stimulatory_C-type_lectin_receptor_signa...	1	0	1	1		autism_spectrum_disorder
autism_spectrum_disorder	0	antigen_processing_and_presentation_of_e...	0	0	1	1		autism_spectrum_disorder	0	antigen_processing_and_presentation_of_e...	0	0	1	1		autism_spectrum_disorder	11	antigen_processing_and_presentation_of_e...	0	0	1	1		autism_spectrum_disorder	0	antigen_processing_and_presentation_of_e...	0	0	1	1			autism_spectrum_disorder	1	antigen_processing_and_presentation_of_e...	0	0	1	1		autism_spectrum_disorder	0	antigen_processing_and_presentation_of_e...	1	0	1	1		autism_spectrum_disorder
autism_spectrum_disorder	0	translational_initiation	0	0	1	1		autism_spectrum_disorder	0	translational_initiation	0	0	1	1		autism_spectrum_disorder	11	translational_initiation	1	0	1	1		autism_spectrum_disorder	0	translational_initiation	1	0	1	1			autism_spectrum_disorder	1	translational_initiation	2	0	1	1		autism_spectrum_disorder	0	translational_initiation	0	0	1	1		autism_spectrum_disorder
autism_spectrum_disorder	0	regulation_of_cellular_amino_acid_metabo...	0	0	1	1		autism_spectrum_disorder	0	regulation_of_cellular_amino_acid_metabo...	0	0	1	1		autism_spectrum_disorder	11	regulation_of_cellular_amino_acid_metabo...	0	0	1	1		autism_spectrum_disorder	0	regulation_of_cellular_amino_acid_metabo...	0	0	1	1			autism_spectrum_disorder	1	regulation_of_cellular_amino_acid_metabo...	0	0	1	1		autism_spectrum_disorder	0	regulation_of_cellular_amino_acid_metabo...	0	0	1	1		autism_spectrum_disorder
autism_spectrum_disorder	0	SRP-dependent_cotranslational_protein_ta...	0	0	1	1		autism_spectrum_disorder	0	SRP-dependent_cotranslational_protein_ta...	0	0	1	1		autism_spectrum_disorder	11	SRP-dependent_cotranslational_protein_ta...	0	0	1	1		autism_spectrum_disorder	0	SRP-dependent_cotranslational_protein_ta...	0	0	1	1			autism_spectrum_disorder	1	SRP-dependent_cotranslational_protein_ta...	0	0	1	1		autism_spectrum_disorder	0	SRP-dependent_cotranslational_protein_ta...	0	0	1	1		autism_spectrum_disorder
autism_spectrum_disorder	0	DNA_damage_response,_signal_transduction...	0	0	1	1		autism_spectrum_disorder	0	DNA_damage_response,_signal_transduction...	0	0	1	1		autism_spectrum_disorder	11	DNA_damage_response,_signal_transduction...	0	0	1	1		autism_spectrum_disorder	0	DNA_damage_response,_signal_transduction...	0	0	1	1			autism_spectrum_disorder	1	DNA_damage_response,_signal_transduction...	0	0	1	1		autism_spectrum_disorder	0	DNA_damage_response,_signal_transduction...	1	0	1	1		autism_spectrum_disorder
autism_spectrum_disorder	0	epidermal_growth_factor_receptor_signali...	1	0	1	1		autism_spectrum_disorder	0	epidermal_growth_factor_receptor_signali...	1	0	1	1		autism_spectrum_disorder	11	epidermal_growth_factor_receptor_signali...	12	2	1	1		autism_spectrum_disorder	0	epidermal_growth_factor_receptor_signali...	0	0	1	1			autism_spectrum_disorder	1	epidermal_growth_factor_receptor_signali...	4	0	1	1		autism_spectrum_disorder	0	epidermal_growth_factor_receptor_signali...	2	0	1	1		autism_spectrum_disorder
autism_spectrum_disorder	0	small_GTPase_mediated_signal_transductio...	0	0	1	1		autism_spectrum_disorder	0	small_GTPase_mediated_signal_transductio...	1	0	1	1		autism_spectrum_disorder	11	small_GTPase_mediated_signal_transductio...	19	4	0.011033	1		autism_spectrum_disorder	0	small_GTPase_mediated_signal_transductio...	1	0	1	1			autism_spectrum_disorder	1	small_GTPase_mediated_signal_transductio...	11	1	1	1		autism_spectrum_disorder	0	small_GTPase_mediated_signal_transductio...	2	0	1	1		autism_spectrum_disorder
autism_spectrum_disorder	0	Ras_protein_signal_transduction	0	0	1	1		autism_spectrum_disorder	0	Ras_protein_signal_transduction	1	0	1	1		autism_spectrum_disorder	11	Ras_protein_signal_transduction	12	2	1	1		autism_spectrum_disorder	0	Ras_protein_signal_transduction	0	0	1	1			autism_spectrum_disorder	1	Ras_protein_signal_transduction	6	1	1	1		autism_spectrum_disorder	0	Ras_protein_signal_transduction	2	0	1	1		autism_spectrum_disorder
autism_spectrum_disorder	0	synaptic_transmission	0	0	1	1		autism_spectrum_disorder	0	synaptic_transmission	0	0	1	1		autism_spectrum_disorder	11	synaptic_transmission	27	10	3.58e-09	6.90752e-05	***	autism_spectrum_disorder	0	synaptic_transmission	1	0	1	1			autism_spectrum_disorder	1	synaptic_transmission	4	1	1	1		autism_spectrum_disorder	0	synaptic_transmission	1	0	1	1		autism_spectrum_disorder
autism_spectrum_disorder	0	neurotransmitter_secretion	0	0	1	1		autism_spectrum_disorder	0	neurotransmitter_secretion	0	0	1	1		autism_spectrum_disorder	11	neurotransmitter_secretion	6	1	1	1		autism_spectrum_disorder	0	neurotransmitter_secretion	0	0	1	1			autism_spectrum_disorder	1	neurotransmitter_secretion	1	0	1	1		autism_spectrum_disorder	0	neurotransmitter_secretion	1	0	1	1		autism_spectrum_disorder
autism_spectrum_disorder	0	axon_guidance	0	0	1	1		autism_spectrum_disorder	0	axon_guidance	1	0	1	1		autism_spectrum_disorder	11	axon_guidance	19	3	0.060337	1		autism_spectrum_disorder	0	axon_guidance	1	0	1	1			autism_spectrum_disorder	1	axon_guidance	9	1	1	1		autism_spectrum_disorder	0	axon_guidance	3	0	1	1		autism_spectrum_disorder
autism_spectrum_disorder	0	synapse_assembly	0	0	1	1		autism_spectrum_disorder	0	synapse_assembly	0	0	1	1		autism_spectrum_disorder	11	synapse_assembly	9	4	0.000524763	0.389916		autism_spectrum_disorder	0	synapse_assembly	0	0	1	1			autism_spectrum_disorder	1	synapse_assembly	1	0	1	1		autism_spectrum_disorder	0	synapse_assembly	0	0	1	1		autism_spectrum_disorder
autism_spectrum_disorder	0	insulin_receptor_signaling_pathway	0	0	1	1		autism_spectrum_disorder	0	insulin_receptor_signaling_pathway	1	0	1	1		autism_spectrum_disorder	11	insulin_receptor_signaling_pathway	10	3	0.0110757	1		autism_spectrum_disorder	0	insulin_receptor_signaling_pathway	0	0	1	1			autism_spectrum_disorder	1	insulin_receptor_signaling_pathway	2	0	1	1		autism_spectrum_disorder	0	insulin_receptor_signaling_pathway	2	0	1	1		autism_spectrum_disorder
autism_spectrum_disorder	0	fibroblast_growth_factor_receptor_signal...	0	0	1	1		autism_spectrum_disorder	0	fibroblast_growth_factor_receptor_signal...	1	0	1	1		autism_spectrum_disorder	11	fibroblast_growth_factor_receptor_signal...	10	3	0.0110757	1		autism_spectrum_disorder	0	fibroblast_growth_factor_receptor_signal...	0	0	1	1			autism_spectrum_disorder	1	fibroblast_growth_factor_receptor_signal...	3	0	1	1		autism_spectrum_disorder	0	fibroblast_growth_factor_receptor_signal...	2	0	1	1		autism_spectrum_disorder
autism_spectrum_disorder	0	proteasomal_ubiquitin-independent_protei...	0	0	1	1		autism_spectrum_disorder	0	proteasomal_ubiquitin-independent_protei...	0	0	1	1		autism_spectrum_disorder	11	proteasomal_ubiquitin-independent_protei...	0	0	1	1		autism_spectrum_disorder	0	proteasomal_ubiquitin-independent_protei...	0	0	1	1			autism_spectrum_disorder	1	proteasomal_ubiquitin-independent_protei...	0	0	1	1		autism_spectrum_disorder	0	proteasomal_ubiquitin-independent_protei...	0	0	1	1		autism_spectrum_disorder
autism_spectrum_disorder	0	viral_process	0	0	1	1		autism_spectrum_disorder	0	viral_process	0	0	1	1		autism_spectrum_disorder	11	viral_process	1	0	1	1		autism_spectrum_disorder	0	viral_process	0	0	1	1			autism_spectrum_disorder	1	viral_process	4	1	1	1		autism_spectrum_disorder	0	viral_process	3	0	1	1		autism_spectrum_disorder
autism_spectrum_disorder	0	substantia_nigra_development	0	0	1	1		autism_spectrum_disorder	0	substantia_nigra_development	0	0	1	1		autism_spectrum_disorder	11	substantia_nigra_development	1	0	1	1		autism_spectrum_disorder	0	substantia_nigra_development	0	0	1	1			autism_spectrum_disorder	1	substantia_nigra_development	5	0	1	1		autism_spectrum_disorder	0	substantia_nigra_development	0	0	1	1		autism_spectrum_disorder
autism_spectrum_disorder	0	platelet_activation	0	0	1	1		autism_spectrum_disorder	0	platelet_activation	0	0	1	1		autism_spectrum_disorder	11	platelet_activation	5	0	1	1		autism_spectrum_disorder	0	platelet_activation	0	0	1	1			autism_spectrum_disorder	1	platelet_activation	7	1	1	1		autism_spectrum_disorder	0	platelet_activation	1	0	1	1		autism_spectrum_disorder
autism_spectrum_disorder	0	anaphase-promoting_complex-dependent_pro...	0	0	1	1		autism_spectrum_disorder	0	anaphase-promoting_complex-dependent_pro...	0	0	1	1		autism_spectrum_disorder	11	anaphase-promoting_complex-dependent_pro...	0	0	1	1		autism_spectrum_disorder	0	anaphase-promoting_complex-dependent_pro...	0	0	1	1			autism_spectrum_disorder	1	anaphase-promoting_complex-dependent_pro...	1	0	1	1		autism_spectrum_disorder	0	anaphase-promoting_complex-dependent_pro...	1	0	1	1		autism_spectrum_disorder
autism_spectrum_disorder	0	tumor_necrosis_factor-mediated_signaling...	0	0	1	1		autism_spectrum_disorder	0	tumor_necrosis_factor-mediated_signaling...	0	0	1	1		autism_spectrum_disorder	11	tumor_necrosis_factor-mediated_signaling...	1	0	1	1		autism_spectrum_disorder	0	tumor_necrosis_factor-mediated_signaling...	0	0	1	1			autism_spectrum_disorder	1	tumor_necrosis_factor-mediated_signaling...	0	0	1	1		autism_spectrum_disorder	0	tumor_necrosis_factor-mediated_signaling...	1	0	1	1		autism_spectrum_disorder
autism_spectrum_disorder	0	cell_junction_assembly	0	0	1	1		autism_spectrum_disorder	0	cell_junction_assembly	0	0	1	1		autism_spectrum_disorder	11	cell_junction_assembly	14	2	1	1		autism_spectrum_disorder	0	cell_junction_assembly	0	0	1	1			autism_spectrum_disorder	1	cell_junction_assembly	6	1	1	1		autism_spectrum_disorder	0	cell_junction_assembly	0	0	1	1		autism_spectrum_disorder
autism_spectrum_disorder	0	adherens_junction_organization	0	0	1	1		autism_spectrum_disorder	0	adherens_junction_organization	0	0	1	1		autism_spectrum_disorder	11	adherens_junction_organization	10	2	1	1		autism_spectrum_disorder	0	adherens_junction_organization	0	0	1	1			autism_spectrum_disorder	1	adherens_junction_organization	6	1	1	1		autism_spectrum_disorder	0	adherens_junction_organization	0	0	1	1		autism_spectrum_disorder
autism_spectrum_disorder	0	social_behavior	0	0	1	1		autism_spectrum_disorder	0	social_behavior	0	0	1	1		autism_spectrum_disorder	11	social_behavior	7	4	0.000156915	0.14817		autism_spectrum_disorder	0	social_behavior	0	0	1	1			autism_spectrum_disorder	1	social_behavior	1	0	1	1		autism_spectrum_disorder	0	social_behavior	0	0	1	1		autism_spectrum_disorder
autism_spectrum_disorder	0	NIK/NF-kappaB_signaling	0	0	1	1		autism_spectrum_disorder	0	NIK/NF-kappaB_signaling	0	0	1	1		autism_spectrum_disorder	11	NIK/NF-kappaB_signaling	1	0	1	1		autism_spectrum_disorder	0	NIK/NF-kappaB_signaling	0	0	1	1			autism_spectrum_disorder	1	NIK/NF-kappaB_signaling	0	0	1	1		autism_spectrum_disorder	0	NIK/NF-kappaB_signaling	1	0	1	1		autism_spectrum_disorder
autism_spectrum_disorder	0	Fc-epsilon_receptor_signaling_pathway	0	0	1	1		autism_spectrum_disorder	0	Fc-epsilon_receptor_signaling_pathway	1	0	1	1		autism_spectrum_disorder	11	Fc-epsilon_receptor_signaling_pathway	9	2	1	1		autism_spectrum_disorder	0	Fc-epsilon_receptor_signaling_pathway	0	0	1	1			autism_spectrum_disorder	1	Fc-epsilon_receptor_signaling_pathway	3	1	1	1		autism_spectrum_disorder	0	Fc-epsilon_receptor_signaling_pathway	2	0	1	1		autism_spectrum_disorder
autism_spectrum_disorder	0	Fc-gamma_receptor_signaling_pathway_invo...	0	0	1	1		autism_spectrum_disorder	0	Fc-gamma_receptor_signaling_pathway_invo...	0	0	1	1		autism_spectrum_disorder	11	Fc-gamma_receptor_signaling_pathway_invo...	4	1	1	1		autism_spectrum_disorder	0	Fc-gamma_receptor_signaling_pathway_invo...	1	0	1	1			autism_spectrum_disorder	1	Fc-gamma_receptor_signaling_pathway_invo...	4	1	1	1		autism_spectrum_disorder	0	Fc-gamma_receptor_signaling_pathway_invo...	1	0	1	1		autism_spectrum_disorder
autism_spectrum_disorder	0	negative_regulation_of_epidermal_growth_...	0	0	1	1		autism_spectrum_disorder	0	negative_regulation_of_epidermal_growth_...	0	0	1	1		autism_spectrum_disorder	11	negative_regulation_of_epidermal_growth_...	2	0	1	1		autism_spectrum_disorder	0	negative_regulation_of_epidermal_growth_...	0	0	1	1			autism_spectrum_disorder	1	negative_regulation_of_epidermal_growth_...	2	0	1	1		autism_spectrum_disorder	0	negative_regulation_of_epidermal_growth_...	2	0	1	1		autism_spectrum_disorder
autism_spectrum_disorder	0	negative_regulation_of_apoptotic_process	0	0	1	1		autism_spectrum_disorder	0	negative_regulation_of_apoptotic_process	0	0	1	1		autism_spectrum_disorder	11	negative_regulation_of_apoptotic_process	5	1	1	1		autism_spectrum_disorder	0	negative_regulation_of_apoptotic_process	1	0	1	1			autism_spectrum_disorder	1	negative_regulation_of_apoptotic_process	5	0	1	1		autism_spectrum_disorder	0	negative_regulation_of_apoptotic_process	1	0	1	1		autism_spectrum_disorder
autism_spectrum_disorder	0	innate_immune_response	1	0	1	1		autism_spectrum_disorder	0	innate_immune_response	1	0	1	1		autism_spectrum_disorder	11	innate_immune_response	16	4	0.00581993	1		autism_spectrum_disorder	0	innate_immune_response	2	0	1	1			autism_spectrum_disorder	1	innate_immune_response	9	1	1	1		autism_spectrum_disorder	0	innate_immune_response	2	0	1	1		autism_spectrum_disorder
autism_spectrum_disorder	0	positive_regulation_of_RNA_polymerase_II...	0	0	1	1		autism_spectrum_disorder	0	positive_regulation_of_RNA_polymerase_II...	0	0	1	1		autism_spectrum_disorder	11	positive_regulation_of_RNA_polymerase_II...	0	0	1	1		autism_spectrum_disorder	0	positive_regulation_of_RNA_polymerase_II...	0	0	1	1			autism_spectrum_disorder	1	positive_regulation_of_RNA_polymerase_II...	0	0	1	1		autism_spectrum_disorder	0	positive_regulation_of_RNA_polymerase_II...	0	0	1	1		autism_spectrum_disorder
autism_spectrum_disorder	0	GMP_metabolic_process	0	0	1	1		autism_spectrum_disorder	0	GMP_metabolic_process	0	0	1	1		autism_spectrum_disorder	11	GMP_metabolic_process	4	0	1	1		autism_spectrum_disorder	0	GMP_metabolic_process	0	0	1	1			autism_spectrum_disorder	1	GMP_metabolic_process	1	0	1	1		autism_spectrum_disorder	0	GMP_metabolic_process	0	0	1	1		autism_spectrum_disorder
autism_spectrum_disorder	0	GDP_metabolic_process	0	0	1	1		autism_spectrum_disorder	0	GDP_metabolic_process	0	0	1	1		autism_spectrum_disorder	11	GDP_metabolic_process	4	0	1	1		autism_spectrum_disorder	0	GDP_metabolic_process	0	0	1	1			autism_spectrum_disorder	1	GDP_metabolic_process	1	0	1	1		autism_spectrum_disorder	0	GDP_metabolic_process	0	0	1	1		autism_spectrum_disorder
autism_spectrum_disorder	0	vascular_endothelial_growth_factor_recep...	0	0	1	1		autism_spectrum_disorder	0	vascular_endothelial_growth_factor_recep...	1	0	1	1		autism_spectrum_disorder	11	vascular_endothelial_growth_factor_recep...	14	4	0.00345549	1		autism_spectrum_disorder	0	vascular_endothelial_growth_factor_recep...	0	0	1	1			autism_spectrum_disorder	1	vascular_endothelial_growth_factor_recep...	6	1	1	1		autism_spectrum_disorder	0	vascular_endothelial_growth_factor_recep...	2	0	1	1		autism_spectrum_disorder
autism_spectrum_disorder	0	neurotrophin_TRK_receptor_signaling_path...	0	0	1	1		autism_spectrum_disorder	0	neurotrophin_TRK_receptor_signaling_path...	1	0	1	1		autism_spectrum_disorder	11	neurotrophin_TRK_receptor_signaling_path...	10	2	1	1		autism_spectrum_disorder	0	neurotrophin_TRK_receptor_signaling_path...	0	0	1	1			autism_spectrum_disorder	1	neurotrophin_TRK_receptor_signaling_path...	5	1	1	1		autism_spectrum_disorder	0	neurotrophin_TRK_receptor_signaling_path...	2	0	1	1		autism_spectrum_disorder
autism_spectrum_disorder	0	ephrin_receptor_signaling_pathway	0	0	1	1		autism_spectrum_disorder	0	ephrin_receptor_signaling_pathway	0	0	1	1		autism_spectrum_disorder	11	ephrin_receptor_signaling_pathway	9	1	1	1		autism_spectrum_disorder	0	ephrin_receptor_signaling_pathway	1	0	1	1			autism_spectrum_disorder	1	ephrin_receptor_signaling_pathway	6	1	1	1		autism_spectrum_disorder	0	ephrin_receptor_signaling_pathway	0	0	1	1		autism_spectrum_disorder
autism_spectrum_disorder	0	regulation_of_synaptic_plasticity	0	0	1	1		autism_spectrum_disorder	0	regulation_of_synaptic_plasticity	0	0	1	1		autism_spectrum_disorder	11	regulation_of_synaptic_plasticity	13	6	7.76e-06	0.0171572		autism_spectrum_disorder	0	regulation_of_synaptic_plasticity	1	0	1	1			autism_spectrum_disorder	1	regulation_of_synaptic_plasticity	1	0	1	1		autism_spectrum_disorder	0	regulation_of_synaptic_plasticity	0	0	1	1		autism_spectrum_disorder
autism_spectrum_disorder	0	neuromuscular_process_controlling_balanc...	0	0	1	1		autism_spectrum_disorder	0	neuromuscular_process_controlling_balanc...	0	0	1	1		autism_spectrum_disorder	11	neuromuscular_process_controlling_balanc...	5	1	1	1		autism_spectrum_disorder	0	neuromuscular_process_controlling_balanc...	0	0	1	1			autism_spectrum_disorder	1	neuromuscular_process_controlling_balanc...	0	0	1	1		autism_spectrum_disorder	0	neuromuscular_process_controlling_balanc...	0	0	1	1		autism_spectrum_disorder
autism_spectrum_disorder	0	actin_filament_bundle_assembly	0	0	1	1		autism_spectrum_disorder	0	actin_filament_bundle_assembly	0	0	1	1		autism_spectrum_disorder	11	actin_filament_bundle_assembly	7	2	1	1		autism_spectrum_disorder	0	actin_filament_bundle_assembly	1	0	1	1			autism_spectrum_disorder	1	actin_filament_bundle_assembly	3	1	1	1		autism_spectrum_disorder	0	actin_filament_bundle_assembly	0	0	1	1		autism_spectrum_disorder
autism_spectrum_disorder	0	'de_novo'_posttranslational_protein_fold...	0	0	1	1		autism_spectrum_disorder	0	'de_novo'_posttranslational_protein_fold...	0	0	1	1		autism_spectrum_disorder	11	'de_novo'_posttranslational_protein_fold...	1	0	1	1		autism_spectrum_disorder	0	'de_novo'_posttranslational_protein_fold...	0	0	1	1			autism_spectrum_disorder	1	'de_novo'_posttranslational_protein_fold...	2	0	1	1		autism_spectrum_disorder	0	'de_novo'_posttranslational_protein_fold...	1	0	1	1		autism_spectrum_disorder
autism_spectrum_disorder	0	negative_regulation_of_ubiquitin-protein...	0	0	1	1		autism_spectrum_disorder	0	negative_regulation_of_ubiquitin-protein...	0	0	1	1		autism_spectrum_disorder	11	negative_regulation_of_ubiquitin-protein...	0	0	1	1		autism_spectrum_disorder	0	negative_regulation_of_ubiquitin-protein...	0	0	1	1			autism_spectrum_disorder	1	negative_regulation_of_ubiquitin-protein...	0	0	1	1		autism_spectrum_disorder	0	negative_regulation_of_ubiquitin-protein...	1	0	1	1		autism_spectrum_disorder
autism_spectrum_disorder	0	positive_regulation_of_ubiquitin-protein...	0	0	1	1		autism_spectrum_disorder	0	positive_regulation_of_ubiquitin-protein...	0	0	1	1		autism_spectrum_disorder	11	positive_regulation_of_ubiquitin-protein...	0	0	1	1		autism_spectrum_disorder	0	positive_regulation_of_ubiquitin-protein...	0	0	1	1			autism_spectrum_disorder	1	positive_regulation_of_ubiquitin-protein...	0	0	1	1		autism_spectrum_disorder	0	positive_regulation_of_ubiquitin-protein...	1	0	1	1		autism_spectrum_disorder
autism_spectrum_disorder	0	actin_filament_capping	0	0	1	1		autism_spectrum_disorder	0	actin_filament_capping	1	0	1	1		autism_spectrum_disorder	11	actin_filament_capping	6	0	1	1		autism_spectrum_disorder	0	actin_filament_capping	1	0	1	1			autism_spectrum_disorder	1	actin_filament_capping	0	0	1	1		autism_spectrum_disorder	0	actin_filament_capping	0	0	1	1		autism_spectrum_disorder
autism_spectrum_disorder	0	vocalization_behavior	0	0	1	1		autism_spectrum_disorder	0	vocalization_behavior	0	0	1	1		autism_spectrum_disorder	11	vocalization_behavior	6	4	6.98e-05	0.0843649		autism_spectrum_disorder	0	vocalization_behavior	0	0	1	1			autism_spectrum_disorder	1	vocalization_behavior	0	0	1	1		autism_spectrum_disorder	0	vocalization_behavior	0	0	1	1		autism_spectrum_disorder
autism_spectrum_disorder	0	negative_regulation_of_canonical_Wnt_sig...	0	0	1	1		autism_spectrum_disorder	0	negative_regulation_of_canonical_Wnt_sig...	0	0	1	1		autism_spectrum_disorder	11	negative_regulation_of_canonical_Wnt_sig...	3	1	1	1		autism_spectrum_disorder	0	negative_regulation_of_canonical_Wnt_sig...	0	0	1	1			autism_spectrum_disorder	1	negative_regulation_of_canonical_Wnt_sig...	1	0	1	1		autism_spectrum_disorder	0	negative_regulation_of_canonical_Wnt_sig...	1	0	1	1		autism_spectrum_disorder
autism_spectrum_disorder	0	positive_regulation_of_canonical_Wnt_sig...	0	0	1	1		autism_spectrum_disorder	0	positive_regulation_of_canonical_Wnt_sig...	0	0	1	1		autism_spectrum_disorder	11	positive_regulation_of_canonical_Wnt_sig...	2	1	1	1		autism_spectrum_disorder	0	positive_regulation_of_canonical_Wnt_sig...	0	0	1	1			autism_spectrum_disorder	1	positive_regulation_of_canonical_Wnt_sig...	0	0	1	1		autism_spectrum_disorder	0	positive_regulation_of_canonical_Wnt_sig...	1	0	1	1		autism_spectrum_disorder
autism_spectrum_disorder	0	intrinsic_apoptotic_signaling_pathway	0	0	1	1		autism_spectrum_disorder	0	intrinsic_apoptotic_signaling_pathway	0	0	1	1		autism_spectrum_disorder	11	intrinsic_apoptotic_signaling_pathway	3	0	1	1		autism_spectrum_disorder	0	intrinsic_apoptotic_signaling_pathway	0	0	1	1			autism_spectrum_disorder	1	intrinsic_apoptotic_signaling_pathway	2	0	1	1		autism_spectrum_disorder	0	intrinsic_apoptotic_signaling_pathway	0	0	1	1		autism_spectrum_disorder
autism_spectrum_disorder	0	toxin_transport	0	0	1	1		autism_spectrum_disorder	0	toxin_transport	0	0	1	1		autism_spectrum_disorder	11	toxin_transport	0	0	1	1		autism_spectrum_disorder	0	toxin_transport	0	0	1	1			autism_spectrum_disorder	1	toxin_transport	1	0	1	1		autism_spectrum_disorder	0	toxin_transport	0	0	1	1		autism_spectrum_disorder
autism_spectrum_disorder	0	positive_regulation_of_excitatory_postsy...	0	0	1	1		autism_spectrum_disorder	0	positive_regulation_of_excitatory_postsy...	0	0	1	1		autism_spectrum_disorder	11	positive_regulation_of_excitatory_postsy...	8	3	0.00562663	1		autism_spectrum_disorder	0	positive_regulation_of_excitatory_postsy...	0	0	1	1			autism_spectrum_disorder	1	positive_regulation_of_excitatory_postsy...	0	0	1	1		autism_spectrum_disorder	0	positive_regulation_of_excitatory_postsy...	0	0	1	1		autism_spectrum_disorder
stomach_cancer	0	G2/M_transition_of_mitotic_cell_cycle	0	0	1	1		stomach_cancer	0	G2/M_transition_of_mitotic_cell_cycle	0	0	1	1		stomach_cancer	2	G2/M_transition_of_mitotic_cell_cycle	0	0	1	1		stomach_cancer	0	G2/M_transition_of_mitotic_cell_cycle	0	0	1	1			stomach_cancer	6	G2/M_transition_of_mitotic_cell_cycle	2	0	1	1		stomach_cancer	0	G2/M_transition_of_mitotic_cell_cycle	1	0	1	1		stomach_cancer
stomach_cancer	0	nuclear-transcribed_mRNA_catabolic_proce...	0	0	1	1		stomach_cancer	0	nuclear-transcribed_mRNA_catabolic_proce...	0	0	1	1		stomach_cancer	2	nuclear-transcribed_mRNA_catabolic_proce...	0	0	1	1		stomach_cancer	0	nuclear-transcribed_mRNA_catabolic_proce...	0	0	1	1			stomach_cancer	6	nuclear-transcribed_mRNA_catabolic_proce...	1	0	1	1		stomach_cancer	0	nuclear-transcribed_mRNA_catabolic_proce...	0	0	1	1		stomach_cancer
stomach_cancer	0	activation_of_MAPKK_activity	0	0	1	1		stomach_cancer	0	activation_of_MAPKK_activity	1	0	1	1		stomach_cancer	2	activation_of_MAPKK_activity	10	0	1	1		stomach_cancer	0	activation_of_MAPKK_activity	0	0	1	1			stomach_cancer	6	activation_of_MAPKK_activity	3	1	1	1		stomach_cancer	0	activation_of_MAPKK_activity	2	0	1	1		stomach_cancer
stomach_cancer	0	protein_polyubiquitination	0	0	1	1		stomach_cancer	0	protein_polyubiquitination	0	0	1	1		stomach_cancer	2	protein_polyubiquitination	0	0	1	1		stomach_cancer	0	protein_polyubiquitination	0	0	1	1			stomach_cancer	6	protein_polyubiquitination	0	0	1	1		stomach_cancer	0	protein_polyubiquitination	1	0	1	1		stomach_cancer
stomach_cancer	0	stimulatory_C-type_lectin_receptor_signa...	0	0	1	1		stomach_cancer	0	stimulatory_C-type_lectin_receptor_signa...	0	0	1	1		stomach_cancer	2	stimulatory_C-type_lectin_receptor_signa...	1	0	1	1		stomach_cancer	0	stimulatory_C-type_lectin_receptor_signa...	0	0	1	1			stomach_cancer	6	stimulatory_C-type_lectin_receptor_signa...	2	1	1	1		stomach_cancer	0	stimulatory_C-type_lectin_receptor_signa...	1	0	1	1		stomach_cancer
stomach_cancer	0	antigen_processing_and_presentation_of_e...	0	0	1	1		stomach_cancer	0	antigen_processing_and_presentation_of_e...	0	0	1	1		stomach_cancer	2	antigen_processing_and_presentation_of_e...	0	0	1	1		stomach_cancer	0	antigen_processing_and_presentation_of_e...	0	0	1	1			stomach_cancer	6	antigen_processing_and_presentation_of_e...	0	0	1	1		stomach_cancer	0	antigen_processing_and_presentation_of_e...	1	0	1	1		stomach_cancer
stomach_cancer	0	translational_initiation	0	0	1	1		stomach_cancer	0	translational_initiation	0	0	1	1		stomach_cancer	2	translational_initiation	1	0	1	1		stomach_cancer	0	translational_initiation	1	0	1	1			stomach_cancer	6	translational_initiation	2	0	1	1		stomach_cancer	0	translational_initiation	0	0	1	1		stomach_cancer
stomach_cancer	0	regulation_of_cellular_amino_acid_metabo...	0	0	1	1		stomach_cancer	0	regulation_of_cellular_amino_acid_metabo...	0	0	1	1		stomach_cancer	2	regulation_of_cellular_amino_acid_metabo...	0	0	1	1		stomach_cancer	0	regulation_of_cellular_amino_acid_metabo...	0	0	1	1			stomach_cancer	6	regulation_of_cellular_amino_acid_metabo...	0	0	1	1		stomach_cancer	0	regulation_of_cellular_amino_acid_metabo...	0	0	1	1		stomach_cancer
stomach_cancer	0	SRP-dependent_cotranslational_protein_ta...	0	0	1	1		stomach_cancer	0	SRP-dependent_cotranslational_protein_ta...	0	0	1	1		stomach_cancer	2	SRP-dependent_cotranslational_protein_ta...	0	0	1	1		stomach_cancer	0	SRP-dependent_cotranslational_protein_ta...	0	0	1	1			stomach_cancer	6	SRP-dependent_cotranslational_protein_ta...	0	0	1	1		stomach_cancer	0	SRP-dependent_cotranslational_protein_ta...	0	0	1	1		stomach_cancer
stomach_cancer	0	DNA_damage_response,_signal_transduction...	0	0	1	1		stomach_cancer	0	DNA_damage_response,_signal_transduction...	0	0	1	1		stomach_cancer	2	DNA_damage_response,_signal_transduction...	0	0	1	1		stomach_cancer	0	DNA_damage_response,_signal_transduction...	0	0	1	1			stomach_cancer	6	DNA_damage_response,_signal_transduction...	0	0	1	1		stomach_cancer	0	DNA_damage_response,_signal_transduction...	1	0	1	1		stomach_cancer
stomach_cancer	0	epidermal_growth_factor_receptor_signali...	1	0	1	1		stomach_cancer	0	epidermal_growth_factor_receptor_signali...	1	0	1	1		stomach_cancer	2	epidermal_growth_factor_receptor_signali...	12	0	1	1		stomach_cancer	0	epidermal_growth_factor_receptor_signali...	0	0	1	1			stomach_cancer	6	epidermal_growth_factor_receptor_signali...	4	1	1	1		stomach_cancer	0	epidermal_growth_factor_receptor_signali...	2	0	1	1		stomach_cancer
stomach_cancer	0	small_GTPase_mediated_signal_transductio...	0	0	1	1		stomach_cancer	0	small_GTPase_mediated_signal_transductio...	1	0	1	1		stomach_cancer	2	small_GTPase_mediated_signal_transductio...	19	1	1	1		stomach_cancer	0	small_GTPase_mediated_signal_transductio...	1	0	1	1			stomach_cancer	6	small_GTPase_mediated_signal_transductio...	11	2	1	1		stomach_cancer	0	small_GTPase_mediated_signal_transductio...	2	0	1	1		stomach_cancer
stomach_cancer	0	Ras_protein_signal_transduction	0	0	1	1		stomach_cancer	0	Ras_protein_signal_transduction	1	0	1	1		stomach_cancer	2	Ras_protein_signal_transduction	12	0	1	1		stomach_cancer	0	Ras_protein_signal_transduction	0	0	1	1			stomach_cancer	6	Ras_protein_signal_transduction	6	2	1	1		stomach_cancer	0	Ras_protein_signal_transduction	2	0	1	1		stomach_cancer
stomach_cancer	0	synaptic_transmission	0	0	1	1		stomach_cancer	0	synaptic_transmission	0	0	1	1		stomach_cancer	2	synaptic_transmission	27	1	1	1		stomach_cancer	0	synaptic_transmission	1	0	1	1			stomach_cancer	6	synaptic_transmission	4	1	1	1		stomach_cancer	0	synaptic_transmission	1	0	1	1		stomach_cancer
stomach_cancer	0	neurotransmitter_secretion	0	0	1	1		stomach_cancer	0	neurotransmitter_secretion	0	0	1	1		stomach_cancer	2	neurotransmitter_secretion	6	0	1	1		stomach_cancer	0	neurotransmitter_secretion	0	0	1	1			stomach_cancer	6	neurotransmitter_secretion	1	0	1	1		stomach_cancer	0	neurotransmitter_secretion	1	0	1	1		stomach_cancer
stomach_cancer	0	axon_guidance	0	0	1	1		stomach_cancer	0	axon_guidance	1	0	1	1		stomach_cancer	2	axon_guidance	19	0	1	1		stomach_cancer	0	axon_guidance	1	0	1	1			stomach_cancer	6	axon_guidance	9	3	0.00022885	0.197574		stomach_cancer	0	axon_guidance	3	0	1	1		stomach_cancer
stomach_cancer	0	synapse_assembly	0	0	1	1		stomach_cancer	0	synapse_assembly	0	0	1	1		stomach_cancer	2	synapse_assembly	9	0	1	1		stomach_cancer	0	synapse_assembly	0	0	1	1			stomach_cancer	6	synapse_assembly	1	0	1	1		stomach_cancer	0	synapse_assembly	0	0	1	1		stomach_cancer
stomach_cancer	0	insulin_receptor_signaling_pathway	0	0	1	1		stomach_cancer	0	insulin_receptor_signaling_pathway	1	0	1	1		stomach_cancer	2	insulin_receptor_signaling_pathway	10	0	1	1		stomach_cancer	0	insulin_receptor_signaling_pathway	0	0	1	1			stomach_cancer	6	insulin_receptor_signaling_pathway	2	1	1	1		stomach_cancer	0	insulin_receptor_signaling_pathway	2	0	1	1		stomach_cancer
stomach_cancer	0	fibroblast_growth_factor_receptor_signal...	0	0	1	1		stomach_cancer	0	fibroblast_growth_factor_receptor_signal...	1	0	1	1		stomach_cancer	2	fibroblast_growth_factor_receptor_signal...	10	1	1	1		stomach_cancer	0	fibroblast_growth_factor_receptor_signal...	0	0	1	1			stomach_cancer	6	fibroblast_growth_factor_receptor_signal...	3	1	1	1		stomach_cancer	0	fibroblast_growth_factor_receptor_signal...	2	0	1	1		stomach_cancer
stomach_cancer	0	proteasomal_ubiquitin-independent_protei...	0	0	1	1		stomach_cancer	0	proteasomal_ubiquitin-independent_protei...	0	0	1	1		stomach_cancer	2	proteasomal_ubiquitin-independent_protei...	0	0	1	1		stomach_cancer	0	proteasomal_ubiquitin-independent_protei...	0	0	1	1			stomach_cancer	6	proteasomal_ubiquitin-independent_protei...	0	0	1	1		stomach_cancer	0	proteasomal_ubiquitin-independent_protei...	0	0	1	1		stomach_cancer
stomach_cancer	0	viral_process	0	0	1	1		stomach_cancer	0	viral_process	0	0	1	1		stomach_cancer	2	viral_process	1	0	1	1		stomach_cancer	0	viral_process	0	0	1	1			stomach_cancer	6	viral_process	4	3	1.14e-05	0.0222848		stomach_cancer	0	viral_process	3	0	1	1		stomach_cancer
stomach_cancer	0	substantia_nigra_development	0	0	1	1		stomach_cancer	0	substantia_nigra_development	0	0	1	1		stomach_cancer	2	substantia_nigra_development	1	0	1	1		stomach_cancer	0	substantia_nigra_development	0	0	1	1			stomach_cancer	6	substantia_nigra_development	5	1	1	1		stomach_cancer	0	substantia_nigra_development	0	0	1	1		stomach_cancer
stomach_cancer	0	platelet_activation	0	0	1	1		stomach_cancer	0	platelet_activation	0	0	1	1		stomach_cancer	2	platelet_activation	5	0	1	1		stomach_cancer	0	platelet_activation	0	0	1	1			stomach_cancer	6	platelet_activation	7	2	1	1		stomach_cancer	0	platelet_activation	1	0	1	1		stomach_cancer
stomach_cancer	0	anaphase-promoting_complex-dependent_pro...	0	0	1	1		stomach_cancer	0	anaphase-promoting_complex-dependent_pro...	0	0	1	1		stomach_cancer	2	anaphase-promoting_complex-dependent_pro...	0	0	1	1		stomach_cancer	0	anaphase-promoting_complex-dependent_pro...	0	0	1	1			stomach_cancer	6	anaphase-promoting_complex-dependent_pro...	1	1	1	1		stomach_cancer	0	anaphase-promoting_complex-dependent_pro...	1	0	1	1		stomach_cancer
stomach_cancer	0	tumor_necrosis_factor-mediated_signaling...	0	0	1	1		stomach_cancer	0	tumor_necrosis_factor-mediated_signaling...	0	0	1	1		stomach_cancer	2	tumor_necrosis_factor-mediated_signaling...	1	0	1	1		stomach_cancer	0	tumor_necrosis_factor-mediated_signaling...	0	0	1	1			stomach_cancer	6	tumor_necrosis_factor-mediated_signaling...	0	0	1	1		stomach_cancer	0	tumor_necrosis_factor-mediated_signaling...	1	0	1	1		stomach_cancer
stomach_cancer	0	cell_junction_assembly	0	0	1	1		stomach_cancer	0	cell_junction_assembly	0	0	1	1		stomach_cancer	2	cell_junction_assembly	14	1	1	1		stomach_cancer	0	cell_junction_assembly	0	0	1	1			stomach_cancer	6	cell_junction_assembly	6	1	1	1		stomach_cancer	0	cell_junction_assembly	0	0	1	1		stomach_cancer
stomach_cancer	0	adherens_junction_organization	0	0	1	1		stomach_cancer	0	adherens_junction_organization	0	0	1	1		stomach_cancer	2	adherens_junction_organization	10	1	1	1		stomach_cancer	0	adherens_junction_organization	0	0	1	1			stomach_cancer	6	adherens_junction_organization	6	1	1	1		stomach_cancer	0	adherens_junction_organization	0	0	1	1		stomach_cancer
stomach_cancer	0	social_behavior	0	0	1	1		stomach_cancer	0	social_behavior	0	0	1	1		stomach_cancer	2	social_behavior	7	0	1	1		stomach_cancer	0	social_behavior	0	0	1	1			stomach_cancer	6	social_behavior	1	1	1	1		stomach_cancer	0	social_behavior	0	0	1	1		stomach_cancer
stomach_cancer	0	NIK/NF-kappaB_signaling	0	0	1	1		stomach_cancer	0	NIK/NF-kappaB_signaling	0	0	1	1		stomach_cancer	2	NIK/NF-kappaB_signaling	1	0	1	1		stomach_cancer	0	NIK/NF-kappaB_signaling	0	0	1	1			stomach_cancer	6	NIK/NF-kappaB_signaling	0	0	1	1		stomach_cancer	0	NIK/NF-kappaB_signaling	1	0	1	1		stomach_cancer
stomach_cancer	0	Fc-epsilon_receptor_signaling_pathway	0	0	1	1		stomach_cancer	0	Fc-epsilon_receptor_signaling_pathway	1	0	1	1		stomach_cancer	2	Fc-epsilon_receptor_signaling_pathway	9	0	1	1		stomach_cancer	0	Fc-epsilon_receptor_signaling_pathway	0	0	1	1			stomach_cancer	6	Fc-epsilon_receptor_signaling_pathway	3	2	1	1		stomach_cancer	0	Fc-epsilon_receptor_signaling_pathway	2	0	1	1		stomach_cancer
stomach_cancer	0	Fc-gamma_receptor_signaling_pathway_invo...	0	0	1	1		stomach_cancer	0	Fc-gamma_receptor_signaling_pathway_invo...	0	0	1	1		stomach_cancer	2	Fc-gamma_receptor_signaling_pathway_invo...	4	0	1	1		stomach_cancer	0	Fc-gamma_receptor_signaling_pathway_invo...	1	0	1	1			stomach_cancer	6	Fc-gamma_receptor_signaling_pathway_invo...	4	1	1	1		stomach_cancer	0	Fc-gamma_receptor_signaling_pathway_invo...	1	0	1	1		stomach_cancer
stomach_cancer	0	negative_regulation_of_epidermal_growth_...	0	0	1	1		stomach_cancer	0	negative_regulation_of_epidermal_growth_...	0	0	1	1		stomach_cancer	2	negative_regulation_of_epidermal_growth_...	2	0	1	1		stomach_cancer	0	negative_regulation_of_epidermal_growth_...	0	0	1	1			stomach_cancer	6	negative_regulation_of_epidermal_growth_...	2	0	1	1		stomach_cancer	0	negative_regulation_of_epidermal_growth_...	2	0	1	1		stomach_cancer
stomach_cancer	0	negative_regulation_of_apoptotic_process	0	0	1	1		stomach_cancer	0	negative_regulation_of_apoptotic_process	0	0	1	1		stomach_cancer	2	negative_regulation_of_apoptotic_process	5	1	1	1		stomach_cancer	0	negative_regulation_of_apoptotic_process	1	0	1	1			stomach_cancer	6	negative_regulation_of_apoptotic_process	5	3	2.82e-05	0.0426055		stomach_cancer	0	negative_regulation_of_apoptotic_process	1	0	1	1		stomach_cancer
stomach_cancer	0	innate_immune_response	1	0	1	1		stomach_cancer	0	innate_immune_response	1	0	1	1		stomach_cancer	2	innate_immune_response	16	1	1	1		stomach_cancer	0	innate_immune_response	2	0	1	1			stomach_cancer	6	innate_immune_response	9	3	0.00022885	0.197574		stomach_cancer	0	innate_immune_response	2	0	1	1		stomach_cancer
stomach_cancer	0	positive_regulation_of_RNA_polymerase_II...	0	0	1	1		stomach_cancer	0	positive_regulation_of_RNA_polymerase_II...	0	0	1	1		stomach_cancer	2	positive_regulation_of_RNA_polymerase_II...	0	0	1	1		stomach_cancer	0	positive_regulation_of_RNA_polymerase_II...	0	0	1	1			stomach_cancer	6	positive_regulation_of_RNA_polymerase_II...	0	0	1	1		stomach_cancer	0	positive_regulation_of_RNA_polymerase_II...	0	0	1	1		stomach_cancer
stomach_cancer	0	GMP_metabolic_process	0	0	1	1		stomach_cancer	0	GMP_metabolic_process	0	0	1	1		stomach_cancer	2	GMP_metabolic_process	4	0	1	1		stomach_cancer	0	GMP_metabolic_process	0	0	1	1			stomach_cancer	6	GMP_metabolic_process	1	0	1	1		stomach_cancer	0	GMP_metabolic_process	0	0	1	1		stomach_cancer
stomach_cancer	0	GDP_metabolic_process	0	0	1	1		stomach_cancer	0	GDP_metabolic_process	0	0	1	1		stomach_cancer	2	GDP_metabolic_process	4	0	1	1		stomach_cancer	0	GDP_metabolic_process	0	0	1	1			stomach_cancer	6	GDP_metabolic_process	1	0	1	1		stomach_cancer	0	GDP_metabolic_process	0	0	1	1		stomach_cancer
stomach_cancer	0	vascular_endothelial_growth_factor_recep...	0	0	1	1		stomach_cancer	0	vascular_endothelial_growth_factor_recep...	1	0	1	1		stomach_cancer	2	vascular_endothelial_growth_factor_recep...	14	0	1	1		stomach_cancer	0	vascular_endothelial_growth_factor_recep...	0	0	1	1			stomach_cancer	6	vascular_endothelial_growth_factor_recep...	6	2	1	1		stomach_cancer	0	vascular_endothelial_growth_factor_recep...	2	0	1	1		stomach_cancer
stomach_cancer	0	neurotrophin_TRK_receptor_signaling_path...	0	0	1	1		stomach_cancer	0	neurotrophin_TRK_receptor_signaling_path...	1	0	1	1		stomach_cancer	2	neurotrophin_TRK_receptor_signaling_path...	10	0	1	1		stomach_cancer	0	neurotrophin_TRK_receptor_signaling_path...	0	0	1	1			stomach_cancer	6	neurotrophin_TRK_receptor_signaling_path...	5	2	1	1		stomach_cancer	0	neurotrophin_TRK_receptor_signaling_path...	2	0	1	1		stomach_cancer
stomach_cancer	0	ephrin_receptor_signaling_pathway	0	0	1	1		stomach_cancer	0	ephrin_receptor_signaling_pathway	0	0	1	1		stomach_cancer	2	ephrin_receptor_signaling_pathway	9	0	1	1		stomach_cancer	0	ephrin_receptor_signaling_pathway	1	0	1	1			stomach_cancer	6	ephrin_receptor_signaling_pathway	6	1	1	1		stomach_cancer	0	ephrin_receptor_signaling_pathway	0	0	1	1		stomach_cancer
stomach_cancer	0	regulation_of_synaptic_plasticity	0	0	1	1		stomach_cancer	0	regulation_of_synaptic_plasticity	0	0	1	1		stomach_cancer	2	regulation_of_synaptic_plasticity	13	0	1	1		stomach_cancer	0	regulation_of_synaptic_plasticity	1	0	1	1			stomach_cancer	6	regulation_of_synaptic_plasticity	1	0	1	1		stomach_cancer	0	regulation_of_synaptic_plasticity	0	0	1	1		stomach_cancer
stomach_cancer	0	neuromuscular_process_controlling_balanc...	0	0	1	1		stomach_cancer	0	neuromuscular_process_controlling_balanc...	0	0	1	1		stomach_cancer	2	neuromuscular_process_controlling_balanc...	5	0	1	1		stomach_cancer	0	neuromuscular_process_controlling_balanc...	0	0	1	1			stomach_cancer	6	neuromuscular_process_controlling_balanc...	0	0	1	1		stomach_cancer	0	neuromuscular_process_controlling_balanc...	0	0	1	1		stomach_cancer
stomach_cancer	0	actin_filament_bundle_assembly	0	0	1	1		stomach_cancer	0	actin_filament_bundle_assembly	0	0	1	1		stomach_cancer	2	actin_filament_bundle_assembly	7	1	1	1		stomach_cancer	0	actin_filament_bundle_assembly	1	0	1	1			stomach_cancer	6	actin_filament_bundle_assembly	3	1	1	1		stomach_cancer	0	actin_filament_bundle_assembly	0	0	1	1		stomach_cancer
stomach_cancer	0	'de_novo'_posttranslational_protein_fold...	0	0	1	1		stomach_cancer	0	'de_novo'_posttranslational_protein_fold...	0	0	1	1		stomach_cancer	2	'de_novo'_posttranslational_protein_fold...	1	0	1	1		stomach_cancer	0	'de_novo'_posttranslational_protein_fold...	0	0	1	1			stomach_cancer	6	'de_novo'_posttranslational_protein_fold...	2	0	1	1		stomach_cancer	0	'de_novo'_posttranslational_protein_fold...	1	0	1	1		stomach_cancer
stomach_cancer	0	negative_regulation_of_ubiquitin-protein...	0	0	1	1		stomach_cancer	0	negative_regulation_of_ubiquitin-protein...	0	0	1	1		stomach_cancer	2	negative_regulation_of_ubiquitin-protein...	0	0	1	1		stomach_cancer	0	negative_regulation_of_ubiquitin-protein...	0	0	1	1			stomach_cancer	6	negative_regulation_of_ubiquitin-protein...	0	0	1	1		stomach_cancer	0	negative_regulation_of_ubiquitin-protein...	1	0	1	1		stomach_cancer
stomach_cancer	0	positive_regulation_of_ubiquitin-protein...	0	0	1	1		stomach_cancer	0	positive_regulation_of_ubiquitin-protein...	0	0	1	1		stomach_cancer	2	positive_regulation_of_ubiquitin-protein...	0	0	1	1		stomach_cancer	0	positive_regulation_of_ubiquitin-protein...	0	0	1	1			stomach_cancer	6	positive_regulation_of_ubiquitin-protein...	0	0	1	1		stomach_cancer	0	positive_regulation_of_ubiquitin-protein...	1	0	1	1		stomach_cancer
stomach_cancer	0	actin_filament_capping	0	0	1	1		stomach_cancer	0	actin_filament_capping	1	0	1	1		stomach_cancer	2	actin_filament_capping	6	1	1	1		stomach_cancer	0	actin_filament_capping	1	0	1	1			stomach_cancer	6	actin_filament_capping	0	0	1	1		stomach_cancer	0	actin_filament_capping	0	0	1	1		stomach_cancer
stomach_cancer	0	vocalization_behavior	0	0	1	1		stomach_cancer	0	vocalization_behavior	0	0	1	1		stomach_cancer	2	vocalization_behavior	6	0	1	1		stomach_cancer	0	vocalization_behavior	0	0	1	1			stomach_cancer	6	vocalization_behavior	0	0	1	1		stomach_cancer	0	vocalization_behavior	0	0	1	1		stomach_cancer
stomach_cancer	0	negative_regulation_of_canonical_Wnt_sig...	0	0	1	1		stomach_cancer	0	negative_regulation_of_canonical_Wnt_sig...	0	0	1	1		stomach_cancer	2	negative_regulation_of_canonical_Wnt_sig...	3	0	1	1		stomach_cancer	0	negative_regulation_of_canonical_Wnt_sig...	0	0	1	1			stomach_cancer	6	negative_regulation_of_canonical_Wnt_sig...	1	0	1	1		stomach_cancer	0	negative_regulation_of_canonical_Wnt_sig...	1	0	1	1		stomach_cancer
stomach_cancer	0	positive_regulation_of_canonical_Wnt_sig...	0	0	1	1		stomach_cancer	0	positive_regulation_of_canonical_Wnt_sig...	0	0	1	1		stomach_cancer	2	positive_regulation_of_canonical_Wnt_sig...	2	1	1	1		stomach_cancer	0	positive_regulation_of_canonical_Wnt_sig...	0	0	1	1			stomach_cancer	6	positive_regulation_of_canonical_Wnt_sig...	0	0	1	1		stomach_cancer	0	positive_regulation_of_canonical_Wnt_sig...	1	0	1	1		stomach_cancer
stomach_cancer	0	intrinsic_apoptotic_signaling_pathway	0	0	1	1		stomach_cancer	0	intrinsic_apoptotic_signaling_pathway	0	0	1	1		stomach_cancer	2	intrinsic_apoptotic_signaling_pathway	3	0	1	1		stomach_cancer	0	intrinsic_apoptotic_signaling_pathway	0	0	1	1			stomach_cancer	6	intrinsic_apoptotic_signaling_pathway	2	0	1	1		stomach_cancer	0	intrinsic_apoptotic_signaling_pathway	0	0	1	1		stomach_cancer
stomach_cancer	0	toxin_transport	0	0	1	1		stomach_cancer	0	toxin_transport	0	0	1	1		stomach_cancer	2	toxin_transport	0	0	1	1		stomach_cancer	0	toxin_transport	0	0	1	1			stomach_cancer	6	toxin_transport	1	1	1	1		stomach_cancer	0	toxin_transport	0	0	1	1		stomach_cancer
stomach_cancer	0	positive_regulation_of_excitatory_postsy...	0	0	1	1		stomach_cancer	0	positive_regulation_of_excitatory_postsy...	0	0	1	1		stomach_cancer	2	positive_regulation_of_excitatory_postsy...	8	0	1	1		stomach_cancer	0	positive_regulation_of_excitatory_postsy...	0	0	1	1			stomach_cancer	6	positive_regulation_of_excitatory_postsy...	0	0	1	1		stomach_cancer	0	positive_regulation_of_excitatory_postsy...	0	0	1	1		stomach_cancer
gastric_lymphoma	0	G2/M_transition_of_mitotic_cell_cycle	0	0	1	1		gastric_lymphoma	0	G2/M_transition_of_mitotic_cell_cycle	0	0	1	1		gastric_lymphoma	0	G2/M_transition_of_mitotic_cell_cycle	0	0	1	1		gastric_lymphoma	0	G2/M_transition_of_mitotic_cell_cycle	0	0	1	1			gastric_lymphoma	0	G2/M_transition_of_mitotic_cell_cycle	2	0	1	1		gastric_lymphoma	0	G2/M_transition_of_mitotic_cell_cycle	1	0	1	1		gastric_lymphoma
gastric_lymphoma	0	nuclear-transcribed_mRNA_catabolic_proce...	0	0	1	1		gastric_lymphoma	0	nuclear-transcribed_mRNA_catabolic_proce...	0	0	1	1		gastric_lymphoma	0	nuclear-transcribed_mRNA_catabolic_proce...	0	0	1	1		gastric_lymphoma	0	nuclear-transcribed_mRNA_catabolic_proce...	0	0	1	1			gastric_lymphoma	0	nuclear-transcribed_mRNA_catabolic_proce...	1	0	1	1		gastric_lymphoma	0	nuclear-transcribed_mRNA_catabolic_proce...	0	0	1	1		gastric_lymphoma
gastric_lymphoma	0	activation_of_MAPKK_activity	0	0	1	1		gastric_lymphoma	0	activation_of_MAPKK_activity	1	0	1	1		gastric_lymphoma	0	activation_of_MAPKK_activity	10	0	1	1		gastric_lymphoma	0	activation_of_MAPKK_activity	0	0	1	1			gastric_lymphoma	0	activation_of_MAPKK_activity	3	0	1	1		gastric_lymphoma	0	activation_of_MAPKK_activity	2	0	1	1		gastric_lymphoma
gastric_lymphoma	0	protein_polyubiquitination	0	0	1	1		gastric_lymphoma	0	protein_polyubiquitination	0	0	1	1		gastric_lymphoma	0	protein_polyubiquitination	0	0	1	1		gastric_lymphoma	0	protein_polyubiquitination	0	0	1	1			gastric_lymphoma	0	protein_polyubiquitination	0	0	1	1		gastric_lymphoma	0	protein_polyubiquitination	1	0	1	1		gastric_lymphoma
gastric_lymphoma	0	stimulatory_C-type_lectin_receptor_signa...	0	0	1	1		gastric_lymphoma	0	stimulatory_C-type_lectin_receptor_signa...	0	0	1	1		gastric_lymphoma	0	stimulatory_C-type_lectin_receptor_signa...	1	0	1	1		gastric_lymphoma	0	stimulatory_C-type_lectin_receptor_signa...	0	0	1	1			gastric_lymphoma	0	stimulatory_C-type_lectin_receptor_signa...	2	0	1	1		gastric_lymphoma	0	stimulatory_C-type_lectin_receptor_signa...	1	0	1	1		gastric_lymphoma
gastric_lymphoma	0	antigen_processing_and_presentation_of_e...	0	0	1	1		gastric_lymphoma	0	antigen_processing_and_presentation_of_e...	0	0	1	1		gastric_lymphoma	0	antigen_processing_and_presentation_of_e...	0	0	1	1		gastric_lymphoma	0	antigen_processing_and_presentation_of_e...	0	0	1	1			gastric_lymphoma	0	antigen_processing_and_presentation_of_e...	0	0	1	1		gastric_lymphoma	0	antigen_processing_and_presentation_of_e...	1	0	1	1		gastric_lymphoma
gastric_lymphoma	0	translational_initiation	0	0	1	1		gastric_lymphoma	0	translational_initiation	0	0	1	1		gastric_lymphoma	0	translational_initiation	1	0	1	1		gastric_lymphoma	0	translational_initiation	1	0	1	1			gastric_lymphoma	0	translational_initiation	2	0	1	1		gastric_lymphoma	0	translational_initiation	0	0	1	1		gastric_lymphoma
gastric_lymphoma	0	regulation_of_cellular_amino_acid_metabo...	0	0	1	1		gastric_lymphoma	0	regulation_of_cellular_amino_acid_metabo...	0	0	1	1		gastric_lymphoma	0	regulation_of_cellular_amino_acid_metabo...	0	0	1	1		gastric_lymphoma	0	regulation_of_cellular_amino_acid_metabo...	0	0	1	1			gastric_lymphoma	0	regulation_of_cellular_amino_acid_metabo...	0	0	1	1		gastric_lymphoma	0	regulation_of_cellular_amino_acid_metabo...	0	0	1	1		gastric_lymphoma
gastric_lymphoma	0	SRP-dependent_cotranslational_protein_ta...	0	0	1	1		gastric_lymphoma	0	SRP-dependent_cotranslational_protein_ta...	0	0	1	1		gastric_lymphoma	0	SRP-dependent_cotranslational_protein_ta...	0	0	1	1		gastric_lymphoma	0	SRP-dependent_cotranslational_protein_ta...	0	0	1	1			gastric_lymphoma	0	SRP-dependent_cotranslational_protein_ta...	0	0	1	1		gastric_lymphoma	0	SRP-dependent_cotranslational_protein_ta...	0	0	1	1		gastric_lymphoma
gastric_lymphoma	0	DNA_damage_response,_signal_transduction...	0	0	1	1		gastric_lymphoma	0	DNA_damage_response,_signal_transduction...	0	0	1	1		gastric_lymphoma	0	DNA_damage_response,_signal_transduction...	0	0	1	1		gastric_lymphoma	0	DNA_damage_response,_signal_transduction...	0	0	1	1			gastric_lymphoma	0	DNA_damage_response,_signal_transduction...	0	0	1	1		gastric_lymphoma	0	DNA_damage_response,_signal_transduction...	1	0	1	1		gastric_lymphoma
gastric_lymphoma	0	epidermal_growth_factor_receptor_signali...	1	0	1	1		gastric_lymphoma	0	epidermal_growth_factor_receptor_signali...	1	0	1	1		gastric_lymphoma	0	epidermal_growth_factor_receptor_signali...	12	0	1	1		gastric_lymphoma	0	epidermal_growth_factor_receptor_signali...	0	0	1	1			gastric_lymphoma	0	epidermal_growth_factor_receptor_signali...	4	0	1	1		gastric_lymphoma	0	epidermal_growth_factor_receptor_signali...	2	0	1	1		gastric_lymphoma
gastric_lymphoma	0	small_GTPase_mediated_signal_transductio...	0	0	1	1		gastric_lymphoma	0	small_GTPase_mediated_signal_transductio...	1	0	1	1		gastric_lymphoma	0	small_GTPase_mediated_signal_transductio...	19	0	1	1		gastric_lymphoma	0	small_GTPase_mediated_signal_transductio...	1	0	1	1			gastric_lymphoma	0	small_GTPase_mediated_signal_transductio...	11	0	1	1		gastric_lymphoma	0	small_GTPase_mediated_signal_transductio...	2	0	1	1		gastric_lymphoma
gastric_lymphoma	0	Ras_protein_signal_transduction	0	0	1	1		gastric_lymphoma	0	Ras_protein_signal_transduction	1	0	1	1		gastric_lymphoma	0	Ras_protein_signal_transduction	12	0	1	1		gastric_lymphoma	0	Ras_protein_signal_transduction	0	0	1	1			gastric_lymphoma	0	Ras_protein_signal_transduction	6	0	1	1		gastric_lymphoma	0	Ras_protein_signal_transduction	2	0	1	1		gastric_lymphoma
gastric_lymphoma	0	synaptic_transmission	0	0	1	1		gastric_lymphoma	0	synaptic_transmission	0	0	1	1		gastric_lymphoma	0	synaptic_transmission	27	0	1	1		gastric_lymphoma	0	synaptic_transmission	1	0	1	1			gastric_lymphoma	0	synaptic_transmission	4	0	1	1		gastric_lymphoma	0	synaptic_transmission	1	0	1	1		gastric_lymphoma
gastric_lymphoma	0	neurotransmitter_secretion	0	0	1	1		gastric_lymphoma	0	neurotransmitter_secretion	0	0	1	1		gastric_lymphoma	0	neurotransmitter_secretion	6	0	1	1		gastric_lymphoma	0	neurotransmitter_secretion	0	0	1	1			gastric_lymphoma	0	neurotransmitter_secretion	1	0	1	1		gastric_lymphoma	0	neurotransmitter_secretion	1	0	1	1		gastric_lymphoma
gastric_lymphoma	0	axon_guidance	0	0	1	1		gastric_lymphoma	0	axon_guidance	1	0	1	1		gastric_lymphoma	0	axon_guidance	19	0	1	1		gastric_lymphoma	0	axon_guidance	1	0	1	1			gastric_lymphoma	0	axon_guidance	9	0	1	1		gastric_lymphoma	0	axon_guidance	3	0	1	1		gastric_lymphoma
gastric_lymphoma	0	synapse_assembly	0	0	1	1		gastric_lymphoma	0	synapse_assembly	0	0	1	1		gastric_lymphoma	0	synapse_assembly	9	0	1	1		gastric_lymphoma	0	synapse_assembly	0	0	1	1			gastric_lymphoma	0	synapse_assembly	1	0	1	1		gastric_lymphoma	0	synapse_assembly	0	0	1	1		gastric_lymphoma
gastric_lymphoma	0	insulin_receptor_signaling_pathway	0	0	1	1		gastric_lymphoma	0	insulin_receptor_signaling_pathway	1	0	1	1		gastric_lymphoma	0	insulin_receptor_signaling_pathway	10	0	1	1		gastric_lymphoma	0	insulin_receptor_signaling_pathway	0	0	1	1			gastric_lymphoma	0	insulin_receptor_signaling_pathway	2	0	1	1		gastric_lymphoma	0	insulin_receptor_signaling_pathway	2	0	1	1		gastric_lymphoma
gastric_lymphoma	0	fibroblast_growth_factor_receptor_signal...	0	0	1	1		gastric_lymphoma	0	fibroblast_growth_factor_receptor_signal...	1	0	1	1		gastric_lymphoma	0	fibroblast_growth_factor_receptor_signal...	10	0	1	1		gastric_lymphoma	0	fibroblast_growth_factor_receptor_signal...	0	0	1	1			gastric_lymphoma	0	fibroblast_growth_factor_receptor_signal...	3	0	1	1		gastric_lymphoma	0	fibroblast_growth_factor_receptor_signal...	2	0	1	1		gastric_lymphoma
gastric_lymphoma	0	proteasomal_ubiquitin-independent_protei...	0	0	1	1		gastric_lymphoma	0	proteasomal_ubiquitin-independent_protei...	0	0	1	1		gastric_lymphoma	0	proteasomal_ubiquitin-independent_protei...	0	0	1	1		gastric_lymphoma	0	proteasomal_ubiquitin-independent_protei...	0	0	1	1			gastric_lymphoma	0	proteasomal_ubiquitin-independent_protei...	0	0	1	1		gastric_lymphoma	0	proteasomal_ubiquitin-independent_protei...	0	0	1	1		gastric_lymphoma
gastric_lymphoma	0	viral_process	0	0	1	1		gastric_lymphoma	0	viral_process	0	0	1	1		gastric_lymphoma	0	viral_process	1	0	1	1		gastric_lymphoma	0	viral_process	0	0	1	1			gastric_lymphoma	0	viral_process	4	0	1	1		gastric_lymphoma	0	viral_process	3	0	1	1		gastric_lymphoma
gastric_lymphoma	0	substantia_nigra_development	0	0	1	1		gastric_lymphoma	0	substantia_nigra_development	0	0	1	1		gastric_lymphoma	0	substantia_nigra_development	1	0	1	1		gastric_lymphoma	0	substantia_nigra_development	0	0	1	1			gastric_lymphoma	0	substantia_nigra_development	5	0	1	1		gastric_lymphoma	0	substantia_nigra_development	0	0	1	1		gastric_lymphoma
gastric_lymphoma	0	platelet_activation	0	0	1	1		gastric_lymphoma	0	platelet_activation	0	0	1	1		gastric_lymphoma	0	platelet_activation	5	0	1	1		gastric_lymphoma	0	platelet_activation	0	0	1	1			gastric_lymphoma	0	platelet_activation	7	0	1	1		gastric_lymphoma	0	platelet_activation	1	0	1	1		gastric_lymphoma
gastric_lymphoma	0	anaphase-promoting_complex-dependent_pro...	0	0	1	1		gastric_lymphoma	0	anaphase-promoting_complex-dependent_pro...	0	0	1	1		gastric_lymphoma	0	anaphase-promoting_complex-dependent_pro...	0	0	1	1		gastric_lymphoma	0	anaphase-promoting_complex-dependent_pro...	0	0	1	1			gastric_lymphoma	0	anaphase-promoting_complex-dependent_pro...	1	0	1	1		gastric_lymphoma	0	anaphase-promoting_complex-dependent_pro...	1	0	1	1		gastric_lymphoma
gastric_lymphoma	0	tumor_necrosis_factor-mediated_signaling...	0	0	1	1		gastric_lymphoma	0	tumor_necrosis_factor-mediated_signaling...	0	0	1	1		gastric_lymphoma	0	tumor_necrosis_factor-mediated_signaling...	1	0	1	1		gastric_lymphoma	0	tumor_necrosis_factor-mediated_signaling...	0	0	1	1			gastric_lymphoma	0	tumor_necrosis_factor-mediated_signaling...	0	0	1	1		gastric_lymphoma	0	tumor_necrosis_factor-mediated_signaling...	1	0	1	1		gastric_lymphoma
gastric_lymphoma	0	cell_junction_assembly	0	0	1	1		gastric_lymphoma	0	cell_junction_assembly	0	0	1	1		gastric_lymphoma	0	cell_junction_assembly	14	0	1	1		gastric_lymphoma	0	cell_junction_assembly	0	0	1	1			gastric_lymphoma	0	cell_junction_assembly	6	0	1	1		gastric_lymphoma	0	cell_junction_assembly	0	0	1	1		gastric_lymphoma
gastric_lymphoma	0	adherens_junction_organization	0	0	1	1		gastric_lymphoma	0	adherens_junction_organization	0	0	1	1		gastric_lymphoma	0	adherens_junction_organization	10	0	1	1		gastric_lymphoma	0	adherens_junction_organization	0	0	1	1			gastric_lymphoma	0	adherens_junction_organization	6	0	1	1		gastric_lymphoma	0	adherens_junction_organization	0	0	1	1		gastric_lymphoma
gastric_lymphoma	0	social_behavior	0	0	1	1		gastric_lymphoma	0	social_behavior	0	0	1	1		gastric_lymphoma	0	social_behavior	7	0	1	1		gastric_lymphoma	0	social_behavior	0	0	1	1			gastric_lymphoma	0	social_behavior	1	0	1	1		gastric_lymphoma	0	social_behavior	0	0	1	1		gastric_lymphoma
gastric_lymphoma	0	NIK/NF-kappaB_signaling	0	0	1	1		gastric_lymphoma	0	NIK/NF-kappaB_signaling	0	0	1	1		gastric_lymphoma	0	NIK/NF-kappaB_signaling	1	0	1	1		gastric_lymphoma	0	NIK/NF-kappaB_signaling	0	0	1	1			gastric_lymphoma	0	NIK/NF-kappaB_signaling	0	0	1	1		gastric_lymphoma	0	NIK/NF-kappaB_signaling	1	0	1	1		gastric_lymphoma
gastric_lymphoma	0	Fc-epsilon_receptor_signaling_pathway	0	0	1	1		gastric_lymphoma	0	Fc-epsilon_receptor_signaling_pathway	1	0	1	1		gastric_lymphoma	0	Fc-epsilon_receptor_signaling_pathway	9	0	1	1		gastric_lymphoma	0	Fc-epsilon_receptor_signaling_pathway	0	0	1	1			gastric_lymphoma	0	Fc-epsilon_receptor_signaling_pathway	3	0	1	1		gastric_lymphoma	0	Fc-epsilon_receptor_signaling_pathway	2	0	1	1		gastric_lymphoma
gastric_lymphoma	0	Fc-gamma_receptor_signaling_pathway_invo...	0	0	1	1		gastric_lymphoma	0	Fc-gamma_receptor_signaling_pathway_invo...	0	0	1	1		gastric_lymphoma	0	Fc-gamma_receptor_signaling_pathway_invo...	4	0	1	1		gastric_lymphoma	0	Fc-gamma_receptor_signaling_pathway_invo...	1	0	1	1			gastric_lymphoma	0	Fc-gamma_receptor_signaling_pathway_invo...	4	0	1	1		gastric_lymphoma	0	Fc-gamma_receptor_signaling_pathway_invo...	1	0	1	1		gastric_lymphoma
gastric_lymphoma	0	negative_regulation_of_epidermal_growth_...	0	0	1	1		gastric_lymphoma	0	negative_regulation_of_epidermal_growth_...	0	0	1	1		gastric_lymphoma	0	negative_regulation_of_epidermal_growth_...	2	0	1	1		gastric_lymphoma	0	negative_regulation_of_epidermal_growth_...	0	0	1	1			gastric_lymphoma	0	negative_regulation_of_epidermal_growth_...	2	0	1	1		gastric_lymphoma	0	negative_regulation_of_epidermal_growth_...	2	0	1	1		gastric_lymphoma
gastric_lymphoma	0	negative_regulation_of_apoptotic_process	0	0	1	1		gastric_lymphoma	0	negative_regulation_of_apoptotic_process	0	0	1	1		gastric_lymphoma	0	negative_regulation_of_apoptotic_process	5	0	1	1		gastric_lymphoma	0	negative_regulation_of_apoptotic_process	1	0	1	1			gastric_lymphoma	0	negative_regulation_of_apoptotic_process	5	0	1	1		gastric_lymphoma	0	negative_regulation_of_apoptotic_process	1	0	1	1		gastric_lymphoma
gastric_lymphoma	0	innate_immune_response	1	0	1	1		gastric_lymphoma	0	innate_immune_response	1	0	1	1		gastric_lymphoma	0	innate_immune_response	16	0	1	1		gastric_lymphoma	0	innate_immune_response	2	0	1	1			gastric_lymphoma	0	innate_immune_response	9	0	1	1		gastric_lymphoma	0	innate_immune_response	2	0	1	1		gastric_lymphoma
gastric_lymphoma	0	positive_regulation_of_RNA_polymerase_II...	0	0	1	1		gastric_lymphoma	0	positive_regulation_of_RNA_polymerase_II...	0	0	1	1		gastric_lymphoma	0	positive_regulation_of_RNA_polymerase_II...	0	0	1	1		gastric_lymphoma	0	positive_regulation_of_RNA_polymerase_II...	0	0	1	1			gastric_lymphoma	0	positive_regulation_of_RNA_polymerase_II...	0	0	1	1		gastric_lymphoma	0	positive_regulation_of_RNA_polymerase_II...	0	0	1	1		gastric_lymphoma
gastric_lymphoma	0	GMP_metabolic_process	0	0	1	1		gastric_lymphoma	0	GMP_metabolic_process	0	0	1	1		gastric_lymphoma	0	GMP_metabolic_process	4	0	1	1		gastric_lymphoma	0	GMP_metabolic_process	0	0	1	1			gastric_lymphoma	0	GMP_metabolic_process	1	0	1	1		gastric_lymphoma	0	GMP_metabolic_process	0	0	1	1		gastric_lymphoma
gastric_lymphoma	0	GDP_metabolic_process	0	0	1	1		gastric_lymphoma	0	GDP_metabolic_process	0	0	1	1		gastric_lymphoma	0	GDP_metabolic_process	4	0	1	1		gastric_lymphoma	0	GDP_metabolic_process	0	0	1	1			gastric_lymphoma	0	GDP_metabolic_process	1	0	1	1		gastric_lymphoma	0	GDP_metabolic_process	0	0	1	1		gastric_lymphoma
gastric_lymphoma	0	vascular_endothelial_growth_factor_recep...	0	0	1	1		gastric_lymphoma	0	vascular_endothelial_growth_factor_recep...	1	0	1	1		gastric_lymphoma	0	vascular_endothelial_growth_factor_recep...	14	0	1	1		gastric_lymphoma	0	vascular_endothelial_growth_factor_recep...	0	0	1	1			gastric_lymphoma	0	vascular_endothelial_growth_factor_recep...	6	0	1	1		gastric_lymphoma	0	vascular_endothelial_growth_factor_recep...	2	0	1	1		gastric_lymphoma
gastric_lymphoma	0	neurotrophin_TRK_receptor_signaling_path...	0	0	1	1		gastric_lymphoma	0	neurotrophin_TRK_receptor_signaling_path...	1	0	1	1		gastric_lymphoma	0	neurotrophin_TRK_receptor_signaling_path...	10	0	1	1		gastric_lymphoma	0	neurotrophin_TRK_receptor_signaling_path...	0	0	1	1			gastric_lymphoma	0	neurotrophin_TRK_receptor_signaling_path...	5	0	1	1		gastric_lymphoma	0	neurotrophin_TRK_receptor_signaling_path...	2	0	1	1		gastric_lymphoma
gastric_lymphoma	0	ephrin_receptor_signaling_pathway	0	0	1	1		gastric_lymphoma	0	ephrin_receptor_signaling_pathway	0	0	1	1		gastric_lymphoma	0	ephrin_receptor_signaling_pathway	9	0	1	1		gastric_lymphoma	0	ephrin_receptor_signaling_pathway	1	0	1	1			gastric_lymphoma	0	ephrin_receptor_signaling_pathway	6	0	1	1		gastric_lymphoma	0	ephrin_receptor_signaling_pathway	0	0	1	1		gastric_lymphoma
gastric_lymphoma	0	regulation_of_synaptic_plasticity	0	0	1	1		gastric_lymphoma	0	regulation_of_synaptic_plasticity	0	0	1	1		gastric_lymphoma	0	regulation_of_synaptic_plasticity	13	0	1	1		gastric_lymphoma	0	regulation_of_synaptic_plasticity	1	0	1	1			gastric_lymphoma	0	regulation_of_synaptic_plasticity	1	0	1	1		gastric_lymphoma	0	regulation_of_synaptic_plasticity	0	0	1	1		gastric_lymphoma
gastric_lymphoma	0	neuromuscular_process_controlling_balanc...	0	0	1	1		gastric_lymphoma	0	neuromuscular_process_controlling_balanc...	0	0	1	1		gastric_lymphoma	0	neuromuscular_process_controlling_balanc...	5	0	1	1		gastric_lymphoma	0	neuromuscular_process_controlling_balanc...	0	0	1	1			gastric_lymphoma	0	neuromuscular_process_controlling_balanc...	0	0	1	1		gastric_lymphoma	0	neuromuscular_process_controlling_balanc...	0	0	1	1		gastric_lymphoma
gastric_lymphoma	0	actin_filament_bundle_assembly	0	0	1	1		gastric_lymphoma	0	actin_filament_bundle_assembly	0	0	1	1		gastric_lymphoma	0	actin_filament_bundle_assembly	7	0	1	1		gastric_lymphoma	0	actin_filament_bundle_assembly	1	0	1	1			gastric_lymphoma	0	actin_filament_bundle_assembly	3	0	1	1		gastric_lymphoma	0	actin_filament_bundle_assembly	0	0	1	1		gastric_lymphoma
gastric_lymphoma	0	'de_novo'_posttranslational_protein_fold...	0	0	1	1		gastric_lymphoma	0	'de_novo'_posttranslational_protein_fold...	0	0	1	1		gastric_lymphoma	0	'de_novo'_posttranslational_protein_fold...	1	0	1	1		gastric_lymphoma	0	'de_novo'_posttranslational_protein_fold...	0	0	1	1			gastric_lymphoma	0	'de_novo'_posttranslational_protein_fold...	2	0	1	1		gastric_lymphoma	0	'de_novo'_posttranslational_protein_fold...	1	0	1	1		gastric_lymphoma
gastric_lymphoma	0	negative_regulation_of_ubiquitin-protein...	0	0	1	1		gastric_lymphoma	0	negative_regulation_of_ubiquitin-protein...	0	0	1	1		gastric_lymphoma	0	negative_regulation_of_ubiquitin-protein...	0	0	1	1		gastric_lymphoma	0	negative_regulation_of_ubiquitin-protein...	0	0	1	1			gastric_lymphoma	0	negative_regulation_of_ubiquitin-protein...	0	0	1	1		gastric_lymphoma	0	negative_regulation_of_ubiquitin-protein...	1	0	1	1		gastric_lymphoma
gastric_lymphoma	0	positive_regulation_of_ubiquitin-protein...	0	0	1	1		gastric_lymphoma	0	positive_regulation_of_ubiquitin-protein...	0	0	1	1		gastric_lymphoma	0	positive_regulation_of_ubiquitin-protein...	0	0	1	1		gastric_lymphoma	0	positive_regulation_of_ubiquitin-protein...	0	0	1	1			gastric_lymphoma	0	positive_regulation_of_ubiquitin-protein...	0	0	1	1		gastric_lymphoma	0	positive_regulation_of_ubiquitin-protein...	1	0	1	1		gastric_lymphoma
gastric_lymphoma	0	actin_filament_capping	0	0	1	1		gastric_lymphoma	0	actin_filament_capping	1	0	1	1		gastric_lymphoma	0	actin_filament_capping	6	0	1	1		gastric_lymphoma	0	actin_filament_capping	1	0	1	1			gastric_lymphoma	0	actin_filament_capping	0	0	1	1		gastric_lymphoma	0	actin_filament_capping	0	0	1	1		gastric_lymphoma
gastric_lymphoma	0	vocalization_behavior	0	0	1	1		gastric_lymphoma	0	vocalization_behavior	0	0	1	1		gastric_lymphoma	0	vocalization_behavior	6	0	1	1		gastric_lymphoma	0	vocalization_behavior	0	0	1	1			gastric_lymphoma	0	vocalization_behavior	0	0	1	1		gastric_lymphoma	0	vocalization_behavior	0	0	1	1		gastric_lymphoma
gastric_lymphoma	0	negative_regulation_of_canonical_Wnt_sig...	0	0	1	1		gastric_lymphoma	0	negative_regulation_of_canonical_Wnt_sig...	0	0	1	1		gastric_lymphoma	0	negative_regulation_of_canonical_Wnt_sig...	3	0	1	1		gastric_lymphoma	0	negative_regulation_of_canonical_Wnt_sig...	0	0	1	1			gastric_lymphoma	0	negative_regulation_of_canonical_Wnt_sig...	1	0	1	1		gastric_lymphoma	0	negative_regulation_of_canonical_Wnt_sig...	1	0	1	1		gastric_lymphoma
gastric_lymphoma	0	positive_regulation_of_canonical_Wnt_sig...	0	0	1	1		gastric_lymphoma	0	positive_regulation_of_canonical_Wnt_sig...	0	0	1	1		gastric_lymphoma	0	positive_regulation_of_canonical_Wnt_sig...	2	0	1	1		gastric_lymphoma	0	positive_regulation_of_canonical_Wnt_sig...	0	0	1	1			gastric_lymphoma	0	positive_regulation_of_canonical_Wnt_sig...	0	0	1	1		gastric_lymphoma	0	positive_regulation_of_canonical_Wnt_sig...	1	0	1	1		gastric_lymphoma
gastric_lymphoma	0	intrinsic_apoptotic_signaling_pathway	0	0	1	1		gastric_lymphoma	0	intrinsic_apoptotic_signaling_pathway	0	0	1	1		gastric_lymphoma	0	intrinsic_apoptotic_signaling_pathway	3	0	1	1		gastric_lymphoma	0	intrinsic_apoptotic_signaling_pathway	0	0	1	1			gastric_lymphoma	0	intrinsic_apoptotic_signaling_pathway	2	0	1	1		gastric_lymphoma	0	intrinsic_apoptotic_signaling_pathway	0	0	1	1		gastric_lymphoma
gastric_lymphoma	0	toxin_transport	0	0	1	1		gastric_lymphoma	0	toxin_transport	0	0	1	1		gastric_lymphoma	0	toxin_transport	0	0	1	1		gastric_lymphoma	0	toxin_transport	0	0	1	1			gastric_lymphoma	0	toxin_transport	1	0	1	1		gastric_lymphoma	0	toxin_transport	0	0	1	1		gastric_lymphoma
gastric_lymphoma	0	positive_regulation_of_excitatory_postsy...	0	0	1	1		gastric_lymphoma	0	positive_regulation_of_excitatory_postsy...	0	0	1	1		gastric_lymphoma	0	positive_regulation_of_excitatory_postsy...	8	0	1	1		gastric_lymphoma	0	positive_regulation_of_excitatory_postsy...	0	0	1	1			gastric_lymphoma	0	positive_regulation_of_excitatory_postsy...	0	0	1	1		gastric_lymphoma	0	positive_regulation_of_excitatory_postsy...	0	0	1	1		gastric_lymphoma
intellectual_disability	0	G2/M_transition_of_mitotic_cell_cycle	0	0	1	1		intellectual_disability	1	G2/M_transition_of_mitotic_cell_cycle	0	0	1	1		intellectual_disability	15	G2/M_transition_of_mitotic_cell_cycle	0	0	1	1		intellectual_disability	1	G2/M_transition_of_mitotic_cell_cycle	0	0	1	1			intellectual_disability	2	G2/M_transition_of_mitotic_cell_cycle	2	1	1	1		intellectual_disability	0	G2/M_transition_of_mitotic_cell_cycle	1	0	1	1		intellectual_disability
intellectual_disability	0	nuclear-transcribed_mRNA_catabolic_proce...	0	0	1	1		intellectual_disability	1	nuclear-transcribed_mRNA_catabolic_proce...	0	0	1	1		intellectual_disability	15	nuclear-transcribed_mRNA_catabolic_proce...	0	0	1	1		intellectual_disability	1	nuclear-transcribed_mRNA_catabolic_proce...	0	0	1	1			intellectual_disability	2	nuclear-transcribed_mRNA_catabolic_proce...	1	1	1	1		intellectual_disability	0	nuclear-transcribed_mRNA_catabolic_proce...	0	0	1	1		intellectual_disability
intellectual_disability	0	activation_of_MAPKK_activity	0	0	1	1		intellectual_disability	1	activation_of_MAPKK_activity	1	1	1	1		intellectual_disability	15	activation_of_MAPKK_activity	10	3	0.0262518	1		intellectual_disability	1	activation_of_MAPKK_activity	0	0	1	1			intellectual_disability	2	activation_of_MAPKK_activity	3	0	1	1		intellectual_disability	0	activation_of_MAPKK_activity	2	0	1	1		intellectual_disability
intellectual_disability	0	protein_polyubiquitination	0	0	1	1		intellectual_disability	1	protein_polyubiquitination	0	0	1	1		intellectual_disability	15	protein_polyubiquitination	0	0	1	1		intellectual_disability	1	protein_polyubiquitination	0	0	1	1			intellectual_disability	2	protein_polyubiquitination	0	0	1	1		intellectual_disability	0	protein_polyubiquitination	1	0	1	1		intellectual_disability
intellectual_disability	0	stimulatory_C-type_lectin_receptor_signa...	0	0	1	1		intellectual_disability	1	stimulatory_C-type_lectin_receptor_signa...	0	0	1	1		intellectual_disability	15	stimulatory_C-type_lectin_receptor_signa...	1	0	1	1		intellectual_disability	1	stimulatory_C-type_lectin_receptor_signa...	0	0	1	1			intellectual_disability	2	stimulatory_C-type_lectin_receptor_signa...	2	0	1	1		intellectual_disability	0	stimulatory_C-type_lectin_receptor_signa...	1	0	1	1		intellectual_disability
intellectual_disability	0	antigen_processing_and_presentation_of_e...	0	0	1	1		intellectual_disability	1	antigen_processing_and_presentation_of_e...	0	0	1	1		intellectual_disability	15	antigen_processing_and_presentation_of_e...	0	0	1	1		intellectual_disability	1	antigen_processing_and_presentation_of_e...	0	0	1	1			intellectual_disability	2	antigen_processing_and_presentation_of_e...	0	0	1	1		intellectual_disability	0	antigen_processing_and_presentation_of_e...	1	0	1	1		intellectual_disability
intellectual_disability	0	translational_initiation	0	0	1	1		intellectual_disability	1	translational_initiation	0	0	1	1		intellectual_disability	15	translational_initiation	1	0	1	1		intellectual_disability	1	translational_initiation	1	0	1	1			intellectual_disability	2	translational_initiation	2	1	1	1		intellectual_disability	0	translational_initiation	0	0	1	1		intellectual_disability
intellectual_disability	0	regulation_of_cellular_amino_acid_metabo...	0	0	1	1		intellectual_disability	1	regulation_of_cellular_amino_acid_metabo...	0	0	1	1		intellectual_disability	15	regulation_of_cellular_amino_acid_metabo...	0	0	1	1		intellectual_disability	1	regulation_of_cellular_amino_acid_metabo...	0	0	1	1			intellectual_disability	2	regulation_of_cellular_amino_acid_metabo...	0	0	1	1		intellectual_disability	0	regulation_of_cellular_amino_acid_metabo...	0	0	1	1		intellectual_disability
intellectual_disability	0	SRP-dependent_cotranslational_protein_ta...	0	0	1	1		intellectual_disability	1	SRP-dependent_cotranslational_protein_ta...	0	0	1	1		intellectual_disability	15	SRP-dependent_cotranslational_protein_ta...	0	0	1	1		intellectual_disability	1	SRP-dependent_cotranslational_protein_ta...	0	0	1	1			intellectual_disability	2	SRP-dependent_cotranslational_protein_ta...	0	0	1	1		intellectual_disability	0	SRP-dependent_cotranslational_protein_ta...	0	0	1	1		intellectual_disability
intellectual_disability	0	DNA_damage_response,_signal_transduction...	0	0	1	1		intellectual_disability	1	DNA_damage_response,_signal_transduction...	0	0	1	1		intellectual_disability	15	DNA_damage_response,_signal_transduction...	0	0	1	1		intellectual_disability	1	DNA_damage_response,_signal_transduction...	0	0	1	1			intellectual_disability	2	DNA_damage_response,_signal_transduction...	0	0	1	1		intellectual_disability	0	DNA_damage_response,_signal_transduction...	1	0	1	1		intellectual_disability
intellectual_disability	0	epidermal_growth_factor_receptor_signali...	1	0	1	1		intellectual_disability	1	epidermal_growth_factor_receptor_signali...	1	1	1	1		intellectual_disability	15	epidermal_growth_factor_receptor_signali...	12	3	0.0422558	1		intellectual_disability	1	epidermal_growth_factor_receptor_signali...	0	0	1	1			intellectual_disability	2	epidermal_growth_factor_receptor_signali...	4	0	1	1		intellectual_disability	0	epidermal_growth_factor_receptor_signali...	2	0	1	1		intellectual_disability
intellectual_disability	0	small_GTPase_mediated_signal_transductio...	0	0	1	1		intellectual_disability	1	small_GTPase_mediated_signal_transductio...	1	1	1	1		intellectual_disability	15	small_GTPase_mediated_signal_transductio...	19	4	0.0327538	1		intellectual_disability	1	small_GTPase_mediated_signal_transductio...	1	0	1	1			intellectual_disability	2	small_GTPase_mediated_signal_transductio...	11	0	1	1		intellectual_disability	0	small_GTPase_mediated_signal_transductio...	2	0	1	1		intellectual_disability
intellectual_disability	0	Ras_protein_signal_transduction	0	0	1	1		intellectual_disability	1	Ras_protein_signal_transduction	1	1	1	1		intellectual_disability	15	Ras_protein_signal_transduction	12	3	0.0422558	1		intellectual_disability	1	Ras_protein_signal_transduction	0	0	1	1			intellectual_disability	2	Ras_protein_signal_transduction	6	0	1	1		intellectual_disability	0	Ras_protein_signal_transduction	2	0	1	1		intellectual_disability
intellectual_disability	0	synaptic_transmission	0	0	1	1		intellectual_disability	1	synaptic_transmission	0	0	1	1		intellectual_disability	15	synaptic_transmission	27	14	2.21e-13	2.00336e-08	***	intellectual_disability	1	synaptic_transmission	1	0	1	1			intellectual_disability	2	synaptic_transmission	4	0	1	1		intellectual_disability	0	synaptic_transmission	1	0	1	1		intellectual_disability
intellectual_disability	0	neurotransmitter_secretion	0	0	1	1		intellectual_disability	1	neurotransmitter_secretion	0	0	1	1		intellectual_disability	15	neurotransmitter_secretion	6	3	0.00565234	1		intellectual_disability	1	neurotransmitter_secretion	0	0	1	1			intellectual_disability	2	neurotransmitter_secretion	1	0	1	1		intellectual_disability	0	neurotransmitter_secretion	1	0	1	1		intellectual_disability
intellectual_disability	0	axon_guidance	0	0	1	1		intellectual_disability	1	axon_guidance	1	1	1	1		intellectual_disability	15	axon_guidance	19	5	0.00628415	1		intellectual_disability	1	axon_guidance	1	0	1	1			intellectual_disability	2	axon_guidance	9	0	1	1		intellectual_disability	0	axon_guidance	3	0	1	1		intellectual_disability
intellectual_disability	0	synapse_assembly	0	0	1	1		intellectual_disability	1	synapse_assembly	0	0	1	1		intellectual_disability	15	synapse_assembly	9	6	4.29e-06	0.013539	*	intellectual_disability	1	synapse_assembly	0	0	1	1			intellectual_disability	2	synapse_assembly	1	0	1	1		intellectual_disability	0	synapse_assembly	0	0	1	1		intellectual_disability
intellectual_disability	0	insulin_receptor_signaling_pathway	0	0	1	1		intellectual_disability	1	insulin_receptor_signaling_pathway	1	1	1	1		intellectual_disability	15	insulin_receptor_signaling_pathway	10	3	0.0262518	1		intellectual_disability	1	insulin_receptor_signaling_pathway	0	0	1	1			intellectual_disability	2	insulin_receptor_signaling_pathway	2	0	1	1		intellectual_disability	0	insulin_receptor_signaling_pathway	2	0	1	1		intellectual_disability
intellectual_disability	0	fibroblast_growth_factor_receptor_signal...	0	0	1	1		intellectual_disability	1	fibroblast_growth_factor_receptor_signal...	1	1	1	1		intellectual_disability	15	fibroblast_growth_factor_receptor_signal...	10	4	0.00306271	1		intellectual_disability	1	fibroblast_growth_factor_receptor_signal...	0	0	1	1			intellectual_disability	2	fibroblast_growth_factor_receptor_signal...	3	1	1	1		intellectual_disability	0	fibroblast_growth_factor_receptor_signal...	2	0	1	1		intellectual_disability
intellectual_disability	0	proteasomal_ubiquitin-independent_protei...	0	0	1	1		intellectual_disability	1	proteasomal_ubiquitin-independent_protei...	0	0	1	1		intellectual_disability	15	proteasomal_ubiquitin-independent_protei...	0	0	1	1		intellectual_disability	1	proteasomal_ubiquitin-independent_protei...	0	0	1	1			intellectual_disability	2	proteasomal_ubiquitin-independent_protei...	0	0	1	1		intellectual_disability	0	proteasomal_ubiquitin-independent_protei...	0	0	1	1		intellectual_disability
intellectual_disability	0	viral_process	0	0	1	1		intellectual_disability	1	viral_process	0	0	1	1		intellectual_disability	15	viral_process	1	0	1	1		intellectual_disability	1	viral_process	0	0	1	1			intellectual_disability	2	viral_process	4	1	1	1		intellectual_disability	0	viral_process	3	0	1	1		intellectual_disability
intellectual_disability	0	substantia_nigra_development	0	0	1	1		intellectual_disability	1	substantia_nigra_development	0	0	1	1		intellectual_disability	15	substantia_nigra_development	1	0	1	1		intellectual_disability	1	substantia_nigra_development	0	0	1	1			intellectual_disability	2	substantia_nigra_development	5	0	1	1		intellectual_disability	0	substantia_nigra_development	0	0	1	1		intellectual_disability
intellectual_disability	0	platelet_activation	0	0	1	1		intellectual_disability	1	platelet_activation	0	0	1	1		intellectual_disability	15	platelet_activation	5	0	1	1		intellectual_disability	1	platelet_activation	0	0	1	1			intellectual_disability	2	platelet_activation	7	0	1	1		intellectual_disability	0	platelet_activation	1	0	1	1		intellectual_disability
intellectual_disability	0	anaphase-promoting_complex-dependent_pro...	0	0	1	1		intellectual_disability	1	anaphase-promoting_complex-dependent_pro...	0	0	1	1		intellectual_disability	15	anaphase-promoting_complex-dependent_pro...	0	0	1	1		intellectual_disability	1	anaphase-promoting_complex-dependent_pro...	0	0	1	1			intellectual_disability	2	anaphase-promoting_complex-dependent_pro...	1	0	1	1		intellectual_disability	0	anaphase-promoting_complex-dependent_pro...	1	0	1	1		intellectual_disability
intellectual_disability	0	tumor_necrosis_factor-mediated_signaling...	0	0	1	1		intellectual_disability	1	tumor_necrosis_factor-mediated_signaling...	0	0	1	1		intellectual_disability	15	tumor_necrosis_factor-mediated_signaling...	1	0	1	1		intellectual_disability	1	tumor_necrosis_factor-mediated_signaling...	0	0	1	1			intellectual_disability	2	tumor_necrosis_factor-mediated_signaling...	0	0	1	1		intellectual_disability	0	tumor_necrosis_factor-mediated_signaling...	1	0	1	1		intellectual_disability
intellectual_disability	0	cell_junction_assembly	0	0	1	1		intellectual_disability	1	cell_junction_assembly	0	0	1	1		intellectual_disability	15	cell_junction_assembly	14	1	1	1		intellectual_disability	1	cell_junction_assembly	0	0	1	1			intellectual_disability	2	cell_junction_assembly	6	0	1	1		intellectual_disability	0	cell_junction_assembly	0	0	1	1		intellectual_disability
intellectual_disability	0	adherens_junction_organization	0	0	1	1		intellectual_disability	1	adherens_junction_organization	0	0	1	1		intellectual_disability	15	adherens_junction_organization	10	1	1	1		intellectual_disability	1	adherens_junction_organization	0	0	1	1			intellectual_disability	2	adherens_junction_organization	6	0	1	1		intellectual_disability	0	adherens_junction_organization	0	0	1	1		intellectual_disability
intellectual_disability	0	social_behavior	0	0	1	1		intellectual_disability	1	social_behavior	0	0	1	1		intellectual_disability	15	social_behavior	7	6	3.93e-07	0.00380082	**	intellectual_disability	1	social_behavior	0	0	1	1			intellectual_disability	2	social_behavior	1	0	1	1		intellectual_disability	0	social_behavior	0	0	1	1		intellectual_disability
intellectual_disability	0	NIK/NF-kappaB_signaling	0	0	1	1		intellectual_disability	1	NIK/NF-kappaB_signaling	0	0	1	1		intellectual_disability	15	NIK/NF-kappaB_signaling	1	0	1	1		intellectual_disability	1	NIK/NF-kappaB_signaling	0	0	1	1			intellectual_disability	2	NIK/NF-kappaB_signaling	0	0	1	1		intellectual_disability	0	NIK/NF-kappaB_signaling	1	0	1	1		intellectual_disability
intellectual_disability	0	Fc-epsilon_receptor_signaling_pathway	0	0	1	1		intellectual_disability	1	Fc-epsilon_receptor_signaling_pathway	1	1	1	1		intellectual_disability	15	Fc-epsilon_receptor_signaling_pathway	9	3	0.0196013	1		intellectual_disability	1	Fc-epsilon_receptor_signaling_pathway	0	0	1	1			intellectual_disability	2	Fc-epsilon_receptor_signaling_pathway	3	0	1	1		intellectual_disability	0	Fc-epsilon_receptor_signaling_pathway	2	0	1	1		intellectual_disability
intellectual_disability	0	Fc-gamma_receptor_signaling_pathway_invo...	0	0	1	1		intellectual_disability	1	Fc-gamma_receptor_signaling_pathway_invo...	0	0	1	1		intellectual_disability	15	Fc-gamma_receptor_signaling_pathway_invo...	4	0	1	1		intellectual_disability	1	Fc-gamma_receptor_signaling_pathway_invo...	1	0	1	1			intellectual_disability	2	Fc-gamma_receptor_signaling_pathway_invo...	4	0	1	1		intellectual_disability	0	Fc-gamma_receptor_signaling_pathway_invo...	1	0	1	1		intellectual_disability
intellectual_disability	0	negative_regulation_of_epidermal_growth_...	0	0	1	1		intellectual_disability	1	negative_regulation_of_epidermal_growth_...	0	0	1	1		intellectual_disability	15	negative_regulation_of_epidermal_growth_...	2	0	1	1		intellectual_disability	1	negative_regulation_of_epidermal_growth_...	0	0	1	1			intellectual_disability	2	negative_regulation_of_epidermal_growth_...	2	0	1	1		intellectual_disability	0	negative_regulation_of_epidermal_growth_...	2	0	1	1		intellectual_disability
intellectual_disability	0	negative_regulation_of_apoptotic_process	0	0	1	1		intellectual_disability	1	negative_regulation_of_apoptotic_process	0	0	1	1		intellectual_disability	15	negative_regulation_of_apoptotic_process	5	3	0.00301049	1		intellectual_disability	1	negative_regulation_of_apoptotic_process	1	0	1	1			intellectual_disability	2	negative_regulation_of_apoptotic_process	5	1	1	1		intellectual_disability	0	negative_regulation_of_apoptotic_process	1	0	1	1		intellectual_disability
intellectual_disability	0	innate_immune_response	1	0	1	1		intellectual_disability	1	innate_immune_response	1	1	1	1		intellectual_disability	15	innate_immune_response	16	4	0.018504	1		intellectual_disability	1	innate_immune_response	2	0	1	1			intellectual_disability	2	innate_immune_response	9	1	1	1		intellectual_disability	0	innate_immune_response	2	0	1	1		intellectual_disability
intellectual_disability	0	positive_regulation_of_RNA_polymerase_II...	0	0	1	1		intellectual_disability	1	positive_regulation_of_RNA_polymerase_II...	0	0	1	1		intellectual_disability	15	positive_regulation_of_RNA_polymerase_II...	0	0	1	1		intellectual_disability	1	positive_regulation_of_RNA_polymerase_II...	0	0	1	1			intellectual_disability	2	positive_regulation_of_RNA_polymerase_II...	0	0	1	1		intellectual_disability	0	positive_regulation_of_RNA_polymerase_II...	0	0	1	1		intellectual_disability
intellectual_disability	0	GMP_metabolic_process	0	0	1	1		intellectual_disability	1	GMP_metabolic_process	0	0	1	1		intellectual_disability	15	GMP_metabolic_process	4	2	1	1		intellectual_disability	1	GMP_metabolic_process	0	0	1	1			intellectual_disability	2	GMP_metabolic_process	1	0	1	1		intellectual_disability	0	GMP_metabolic_process	0	0	1	1		intellectual_disability
intellectual_disability	0	GDP_metabolic_process	0	0	1	1		intellectual_disability	1	GDP_metabolic_process	0	0	1	1		intellectual_disability	15	GDP_metabolic_process	4	2	1	1		intellectual_disability	1	GDP_metabolic_process	0	0	1	1			intellectual_disability	2	GDP_metabolic_process	1	0	1	1		intellectual_disability	0	GDP_metabolic_process	0	0	1	1		intellectual_disability
intellectual_disability	0	vascular_endothelial_growth_factor_recep...	0	0	1	1		intellectual_disability	1	vascular_endothelial_growth_factor_recep...	1	1	1	1		intellectual_disability	15	vascular_endothelial_growth_factor_recep...	14	3	0.0612958	1		intellectual_disability	1	vascular_endothelial_growth_factor_recep...	0	0	1	1			intellectual_disability	2	vascular_endothelial_growth_factor_recep...	6	0	1	1		intellectual_disability	0	vascular_endothelial_growth_factor_recep...	2	0	1	1		intellectual_disability
intellectual_disability	0	neurotrophin_TRK_receptor_signaling_path...	0	0	1	1		intellectual_disability	1	neurotrophin_TRK_receptor_signaling_path...	1	1	1	1		intellectual_disability	15	neurotrophin_TRK_receptor_signaling_path...	10	3	0.0262518	1		intellectual_disability	1	neurotrophin_TRK_receptor_signaling_path...	0	0	1	1			intellectual_disability	2	neurotrophin_TRK_receptor_signaling_path...	5	0	1	1		intellectual_disability	0	neurotrophin_TRK_receptor_signaling_path...	2	0	1	1		intellectual_disability
intellectual_disability	0	ephrin_receptor_signaling_pathway	0	0	1	1		intellectual_disability	1	ephrin_receptor_signaling_pathway	0	0	1	1		intellectual_disability	15	ephrin_receptor_signaling_pathway	9	2	1	1		intellectual_disability	1	ephrin_receptor_signaling_pathway	1	0	1	1			intellectual_disability	2	ephrin_receptor_signaling_pathway	6	0	1	1		intellectual_disability	0	ephrin_receptor_signaling_pathway	0	0	1	1		intellectual_disability
intellectual_disability	0	regulation_of_synaptic_plasticity	0	0	1	1		intellectual_disability	1	regulation_of_synaptic_plasticity	0	0	1	1		intellectual_disability	15	regulation_of_synaptic_plasticity	13	6	7.22e-05	0.084999		intellectual_disability	1	regulation_of_synaptic_plasticity	1	0	1	1			intellectual_disability	2	regulation_of_synaptic_plasticity	1	0	1	1		intellectual_disability	0	regulation_of_synaptic_plasticity	0	0	1	1		intellectual_disability
intellectual_disability	0	neuromuscular_process_controlling_balanc...	0	0	1	1		intellectual_disability	1	neuromuscular_process_controlling_balanc...	0	0	1	1		intellectual_disability	15	neuromuscular_process_controlling_balanc...	5	3	0.00301049	1		intellectual_disability	1	neuromuscular_process_controlling_balanc...	0	0	1	1			intellectual_disability	2	neuromuscular_process_controlling_balanc...	0	0	1	1		intellectual_disability	0	neuromuscular_process_controlling_balanc...	0	0	1	1		intellectual_disability
intellectual_disability	0	actin_filament_bundle_assembly	0	0	1	1		intellectual_disability	1	actin_filament_bundle_assembly	0	0	1	1		intellectual_disability	15	actin_filament_bundle_assembly	7	2	1	1		intellectual_disability	1	actin_filament_bundle_assembly	1	1	1	1			intellectual_disability	2	actin_filament_bundle_assembly	3	0	1	1		intellectual_disability	0	actin_filament_bundle_assembly	0	0	1	1		intellectual_disability
intellectual_disability	0	'de_novo'_posttranslational_protein_fold...	0	0	1	1		intellectual_disability	1	'de_novo'_posttranslational_protein_fold...	0	0	1	1		intellectual_disability	15	'de_novo'_posttranslational_protein_fold...	1	0	1	1		intellectual_disability	1	'de_novo'_posttranslational_protein_fold...	0	0	1	1			intellectual_disability	2	'de_novo'_posttranslational_protein_fold...	2	0	1	1		intellectual_disability	0	'de_novo'_posttranslational_protein_fold...	1	0	1	1		intellectual_disability
intellectual_disability	0	negative_regulation_of_ubiquitin-protein...	0	0	1	1		intellectual_disability	1	negative_regulation_of_ubiquitin-protein...	0	0	1	1		intellectual_disability	15	negative_regulation_of_ubiquitin-protein...	0	0	1	1		intellectual_disability	1	negative_regulation_of_ubiquitin-protein...	0	0	1	1			intellectual_disability	2	negative_regulation_of_ubiquitin-protein...	0	0	1	1		intellectual_disability	0	negative_regulation_of_ubiquitin-protein...	1	0	1	1		intellectual_disability
intellectual_disability	0	positive_regulation_of_ubiquitin-protein...	0	0	1	1		intellectual_disability	1	positive_regulation_of_ubiquitin-protein...	0	0	1	1		intellectual_disability	15	positive_regulation_of_ubiquitin-protein...	0	0	1	1		intellectual_disability	1	positive_regulation_of_ubiquitin-protein...	0	0	1	1			intellectual_disability	2	positive_regulation_of_ubiquitin-protein...	0	0	1	1		intellectual_disability	0	positive_regulation_of_ubiquitin-protein...	1	0	1	1		intellectual_disability
intellectual_disability	0	actin_filament_capping	0	0	1	1		intellectual_disability	1	actin_filament_capping	1	1	1	1		intellectual_disability	15	actin_filament_capping	6	0	1	1		intellectual_disability	1	actin_filament_capping	1	0	1	1			intellectual_disability	2	actin_filament_capping	0	0	1	1		intellectual_disability	0	actin_filament_capping	0	0	1	1		intellectual_disability
intellectual_disability	0	vocalization_behavior	0	0	1	1		intellectual_disability	1	vocalization_behavior	0	0	1	1		intellectual_disability	15	vocalization_behavior	6	5	6.58e-06	0.0162008		intellectual_disability	1	vocalization_behavior	0	0	1	1			intellectual_disability	2	vocalization_behavior	0	0	1	1		intellectual_disability	0	vocalization_behavior	0	0	1	1		intellectual_disability
intellectual_disability	0	negative_regulation_of_canonical_Wnt_sig...	0	0	1	1		intellectual_disability	1	negative_regulation_of_canonical_Wnt_sig...	0	0	1	1		intellectual_disability	15	negative_regulation_of_canonical_Wnt_sig...	3	0	1	1		intellectual_disability	1	negative_regulation_of_canonical_Wnt_sig...	0	0	1	1			intellectual_disability	2	negative_regulation_of_canonical_Wnt_sig...	1	0	1	1		intellectual_disability	0	negative_regulation_of_canonical_Wnt_sig...	1	0	1	1		intellectual_disability
intellectual_disability	0	positive_regulation_of_canonical_Wnt_sig...	0	0	1	1		intellectual_disability	1	positive_regulation_of_canonical_Wnt_sig...	0	0	1	1		intellectual_disability	15	positive_regulation_of_canonical_Wnt_sig...	2	1	1	1		intellectual_disability	1	positive_regulation_of_canonical_Wnt_sig...	0	0	1	1			intellectual_disability	2	positive_regulation_of_canonical_Wnt_sig...	0	0	1	1		intellectual_disability	0	positive_regulation_of_canonical_Wnt_sig...	1	0	1	1		intellectual_disability
intellectual_disability	0	intrinsic_apoptotic_signaling_pathway	0	0	1	1		intellectual_disability	1	intrinsic_apoptotic_signaling_pathway	0	0	1	1		intellectual_disability	15	intrinsic_apoptotic_signaling_pathway	3	0	1	1		intellectual_disability	1	intrinsic_apoptotic_signaling_pathway	0	0	1	1			intellectual_disability	2	intrinsic_apoptotic_signaling_pathway	2	1	1	1		intellectual_disability	0	intrinsic_apoptotic_signaling_pathway	0	0	1	1		intellectual_disability
intellectual_disability	0	toxin_transport	0	0	1	1		intellectual_disability	1	toxin_transport	0	0	1	1		intellectual_disability	15	toxin_transport	0	0	1	1		intellectual_disability	1	toxin_transport	0	0	1	1			intellectual_disability	2	toxin_transport	1	0	1	1		intellectual_disability	0	toxin_transport	0	0	1	1		intellectual_disability
intellectual_disability	0	positive_regulation_of_excitatory_postsy...	0	0	1	1		intellectual_disability	1	positive_regulation_of_excitatory_postsy...	0	0	1	1		intellectual_disability	15	positive_regulation_of_excitatory_postsy...	8	5	5.52e-05	0.0725199		intellectual_disability	1	positive_regulation_of_excitatory_postsy...	0	0	1	1			intellectual_disability	2	positive_regulation_of_excitatory_postsy...	0	0	1	1		intellectual_disability	0	positive_regulation_of_excitatory_postsy...	0	0	1	1		intellectual_disability
Alzheimer's_disease	0	G2/M_transition_of_mitotic_cell_cycle	0	0	1	1		Alzheimer's_disease	0	G2/M_transition_of_mitotic_cell_cycle	0	0	1	1		Alzheimer's_disease	16	G2/M_transition_of_mitotic_cell_cycle	0	0	1	1		Alzheimer's_disease	1	G2/M_transition_of_mitotic_cell_cycle	0	0	1	1			Alzheimer's_disease	5	G2/M_transition_of_mitotic_cell_cycle	2	0	1	1		Alzheimer's_disease	1	G2/M_transition_of_mitotic_cell_cycle	1	0	1	1		Alzheimer's_disease
Alzheimer's_disease	0	nuclear-transcribed_mRNA_catabolic_proce...	0	0	1	1		Alzheimer's_disease	0	nuclear-transcribed_mRNA_catabolic_proce...	0	0	1	1		Alzheimer's_disease	16	nuclear-transcribed_mRNA_catabolic_proce...	0	0	1	1		Alzheimer's_disease	1	nuclear-transcribed_mRNA_catabolic_proce...	0	0	1	1			Alzheimer's_disease	5	nuclear-transcribed_mRNA_catabolic_proce...	1	0	1	1		Alzheimer's_disease	1	nuclear-transcribed_mRNA_catabolic_proce...	0	0	1	1		Alzheimer's_disease
Alzheimer's_disease	0	activation_of_MAPKK_activity	0	0	1	1		Alzheimer's_disease	0	activation_of_MAPKK_activity	1	0	1	1		Alzheimer's_disease	16	activation_of_MAPKK_activity	10	6	1.6e-05	0.0263709		Alzheimer's_disease	1	activation_of_MAPKK_activity	0	0	1	1			Alzheimer's_disease	5	activation_of_MAPKK_activity	3	1	1	1		Alzheimer's_disease	1	activation_of_MAPKK_activity	2	0	1	1		Alzheimer's_disease
Alzheimer's_disease	0	protein_polyubiquitination	0	0	1	1		Alzheimer's_disease	0	protein_polyubiquitination	0	0	1	1		Alzheimer's_disease	16	protein_polyubiquitination	0	0	1	1		Alzheimer's_disease	1	protein_polyubiquitination	0	0	1	1			Alzheimer's_disease	5	protein_polyubiquitination	0	0	1	1		Alzheimer's_disease	1	protein_polyubiquitination	1	0	1	1		Alzheimer's_disease
Alzheimer's_disease	0	stimulatory_C-type_lectin_receptor_signa...	0	0	1	1		Alzheimer's_disease	0	stimulatory_C-type_lectin_receptor_signa...	0	0	1	1		Alzheimer's_disease	16	stimulatory_C-type_lectin_receptor_signa...	1	1	1	1		Alzheimer's_disease	1	stimulatory_C-type_lectin_receptor_signa...	0	0	1	1			Alzheimer's_disease	5	stimulatory_C-type_lectin_receptor_signa...	2	1	1	1		Alzheimer's_disease	1	stimulatory_C-type_lectin_receptor_signa...	1	0	1	1		Alzheimer's_disease
Alzheimer's_disease	0	antigen_processing_and_presentation_of_e...	0	0	1	1		Alzheimer's_disease	0	antigen_processing_and_presentation_of_e...	0	0	1	1		Alzheimer's_disease	16	antigen_processing_and_presentation_of_e...	0	0	1	1		Alzheimer's_disease	1	antigen_processing_and_presentation_of_e...	0	0	1	1			Alzheimer's_disease	5	antigen_processing_and_presentation_of_e...	0	0	1	1		Alzheimer's_disease	1	antigen_processing_and_presentation_of_e...	1	0	1	1		Alzheimer's_disease
Alzheimer's_disease	0	translational_initiation	0	0	1	1		Alzheimer's_disease	0	translational_initiation	0	0	1	1		Alzheimer's_disease	16	translational_initiation	1	1	1	1		Alzheimer's_disease	1	translational_initiation	1	0	1	1			Alzheimer's_disease	5	translational_initiation	2	0	1	1		Alzheimer's_disease	1	translational_initiation	0	0	1	1		Alzheimer's_disease
Alzheimer's_disease	0	regulation_of_cellular_amino_acid_metabo...	0	0	1	1		Alzheimer's_disease	0	regulation_of_cellular_amino_acid_metabo...	0	0	1	1		Alzheimer's_disease	16	regulation_of_cellular_amino_acid_metabo...	0	0	1	1		Alzheimer's_disease	1	regulation_of_cellular_amino_acid_metabo...	0	0	1	1			Alzheimer's_disease	5	regulation_of_cellular_amino_acid_metabo...	0	0	1	1		Alzheimer's_disease	1	regulation_of_cellular_amino_acid_metabo...	0	0	1	1		Alzheimer's_disease
Alzheimer's_disease	0	SRP-dependent_cotranslational_protein_ta...	0	0	1	1		Alzheimer's_disease	0	SRP-dependent_cotranslational_protein_ta...	0	0	1	1		Alzheimer's_disease	16	SRP-dependent_cotranslational_protein_ta...	0	0	1	1		Alzheimer's_disease	1	SRP-dependent_cotranslational_protein_ta...	0	0	1	1			Alzheimer's_disease	5	SRP-dependent_cotranslational_protein_ta...	0	0	1	1		Alzheimer's_disease	1	SRP-dependent_cotranslational_protein_ta...	0	0	1	1		Alzheimer's_disease
Alzheimer's_disease	0	DNA_damage_response,_signal_transduction...	0	0	1	1		Alzheimer's_disease	0	DNA_damage_response,_signal_transduction...	0	0	1	1		Alzheimer's_disease	16	DNA_damage_response,_signal_transduction...	0	0	1	1		Alzheimer's_disease	1	DNA_damage_response,_signal_transduction...	0	0	1	1			Alzheimer's_disease	5	DNA_damage_response,_signal_transduction...	0	0	1	1		Alzheimer's_disease	1	DNA_damage_response,_signal_transduction...	1	0	1	1		Alzheimer's_disease
Alzheimer's_disease	0	epidermal_growth_factor_receptor_signali...	1	0	1	1		Alzheimer's_disease	0	epidermal_growth_factor_receptor_signali...	1	0	1	1		Alzheimer's_disease	16	epidermal_growth_factor_receptor_signali...	12	7	3.01e-06	0.0103408	*	Alzheimer's_disease	1	epidermal_growth_factor_receptor_signali...	0	0	1	1			Alzheimer's_disease	5	epidermal_growth_factor_receptor_signali...	4	1	1	1		Alzheimer's_disease	1	epidermal_growth_factor_receptor_signali...	2	0	1	1		Alzheimer's_disease
Alzheimer's_disease	0	small_GTPase_mediated_signal_transductio...	0	0	1	1		Alzheimer's_disease	0	small_GTPase_mediated_signal_transductio...	1	0	1	1		Alzheimer's_disease	16	small_GTPase_mediated_signal_transductio...	19	9	5.87e-07	0.00380082	**	Alzheimer's_disease	1	small_GTPase_mediated_signal_transductio...	1	0	1	1			Alzheimer's_disease	5	small_GTPase_mediated_signal_transductio...	11	3	0.00022607	0.197574		Alzheimer's_disease	1	small_GTPase_mediated_signal_transductio...	2	0	1	1		Alzheimer's_disease
Alzheimer's_disease	0	Ras_protein_signal_transduction	0	0	1	1		Alzheimer's_disease	0	Ras_protein_signal_transduction	1	0	1	1		Alzheimer's_disease	16	Ras_protein_signal_transduction	12	7	3.01e-06	0.0103408	*	Alzheimer's_disease	1	Ras_protein_signal_transduction	0	0	1	1			Alzheimer's_disease	5	Ras_protein_signal_transduction	6	3	2.82e-05	0.0426055		Alzheimer's_disease	1	Ras_protein_signal_transduction	2	0	1	1		Alzheimer's_disease
Alzheimer's_disease	0	synaptic_transmission	0	0	1	1		Alzheimer's_disease	0	synaptic_transmission	0	0	1	1		Alzheimer's_disease	16	synaptic_transmission	27	10	1.62e-06	0.00742466	*	Alzheimer's_disease	1	synaptic_transmission	1	1	1	1			Alzheimer's_disease	5	synaptic_transmission	4	2	1	1		Alzheimer's_disease	1	synaptic_transmission	1	1	1	1		Alzheimer's_disease
Alzheimer's_disease	0	neurotransmitter_secretion	0	0	1	1		Alzheimer's_disease	0	neurotransmitter_secretion	0	0	1	1		Alzheimer's_disease	16	neurotransmitter_secretion	6	1	1	1		Alzheimer's_disease	1	neurotransmitter_secretion	0	0	1	1			Alzheimer's_disease	5	neurotransmitter_secretion	1	0	1	1		Alzheimer's_disease	1	neurotransmitter_secretion	1	1	1	1		Alzheimer's_disease
Alzheimer's_disease	0	axon_guidance	0	0	1	1		Alzheimer's_disease	0	axon_guidance	1	0	1	1		Alzheimer's_disease	16	axon_guidance	19	7	0.000135403	0.131981		Alzheimer's_disease	1	axon_guidance	1	0	1	1			Alzheimer's_disease	5	axon_guidance	9	2	1	1		Alzheimer's_disease	1	axon_guidance	3	1	1	1		Alzheimer's_disease
Alzheimer's_disease	0	synapse_assembly	0	0	1	1		Alzheimer's_disease	0	synapse_assembly	0	0	1	1		Alzheimer's_disease	16	synapse_assembly	9	3	0.0233465	1		Alzheimer's_disease	1	synapse_assembly	0	0	1	1			Alzheimer's_disease	5	synapse_assembly	1	0	1	1		Alzheimer's_disease	1	synapse_assembly	0	0	1	1		Alzheimer's_disease
Alzheimer's_disease	0	insulin_receptor_signaling_pathway	0	0	1	1		Alzheimer's_disease	0	insulin_receptor_signaling_pathway	1	0	1	1		Alzheimer's_disease	16	insulin_receptor_signaling_pathway	10	6	1.6e-05	0.0263709		Alzheimer's_disease	1	insulin_receptor_signaling_pathway	0	0	1	1			Alzheimer's_disease	5	insulin_receptor_signaling_pathway	2	1	1	1		Alzheimer's_disease	1	insulin_receptor_signaling_pathway	2	0	1	1		Alzheimer's_disease
Alzheimer's_disease	0	fibroblast_growth_factor_receptor_signal...	0	0	1	1		Alzheimer's_disease	0	fibroblast_growth_factor_receptor_signal...	1	0	1	1		Alzheimer's_disease	16	fibroblast_growth_factor_receptor_signal...	10	7	5.03e-07	0.00380082	**	Alzheimer's_disease	1	fibroblast_growth_factor_receptor_signal...	0	0	1	1			Alzheimer's_disease	5	fibroblast_growth_factor_receptor_signal...	3	1	1	1		Alzheimer's_disease	1	fibroblast_growth_factor_receptor_signal...	2	0	1	1		Alzheimer's_disease
Alzheimer's_disease	0	proteasomal_ubiquitin-independent_protei...	0	0	1	1		Alzheimer's_disease	0	proteasomal_ubiquitin-independent_protei...	0	0	1	1		Alzheimer's_disease	16	proteasomal_ubiquitin-independent_protei...	0	0	1	1		Alzheimer's_disease	1	proteasomal_ubiquitin-independent_protei...	0	0	1	1			Alzheimer's_disease	5	proteasomal_ubiquitin-independent_protei...	0	0	1	1		Alzheimer's_disease	1	proteasomal_ubiquitin-independent_protei...	0	0	1	1		Alzheimer's_disease
Alzheimer's_disease	0	viral_process	0	0	1	1		Alzheimer's_disease	0	viral_process	0	0	1	1		Alzheimer's_disease	16	viral_process	1	1	1	1		Alzheimer's_disease	1	viral_process	0	0	1	1			Alzheimer's_disease	5	viral_process	4	1	1	1		Alzheimer's_disease	1	viral_process	3	1	1	1		Alzheimer's_disease
Alzheimer's_disease	0	substantia_nigra_development	0	0	1	1		Alzheimer's_disease	0	substantia_nigra_development	0	0	1	1		Alzheimer's_disease	16	substantia_nigra_development	1	0	1	1		Alzheimer's_disease	1	substantia_nigra_development	0	0	1	1			Alzheimer's_disease	5	substantia_nigra_development	5	2	1	1		Alzheimer's_disease	1	substantia_nigra_development	0	0	1	1		Alzheimer's_disease
Alzheimer's_disease	0	platelet_activation	0	0	1	1		Alzheimer's_disease	0	platelet_activation	0	0	1	1		Alzheimer's_disease	16	platelet_activation	5	1	1	1		Alzheimer's_disease	1	platelet_activation	0	0	1	1			Alzheimer's_disease	5	platelet_activation	7	3	4.91e-05	0.0664315		Alzheimer's_disease	1	platelet_activation	1	0	1	1		Alzheimer's_disease
Alzheimer's_disease	0	anaphase-promoting_complex-dependent_pro...	0	0	1	1		Alzheimer's_disease	0	anaphase-promoting_complex-dependent_pro...	0	0	1	1		Alzheimer's_disease	16	anaphase-promoting_complex-dependent_pro...	0	0	1	1		Alzheimer's_disease	1	anaphase-promoting_complex-dependent_pro...	0	0	1	1			Alzheimer's_disease	5	anaphase-promoting_complex-dependent_pro...	1	0	1	1		Alzheimer's_disease	1	anaphase-promoting_complex-dependent_pro...	1	0	1	1		Alzheimer's_disease
Alzheimer's_disease	0	tumor_necrosis_factor-mediated_signaling...	0	0	1	1		Alzheimer's_disease	0	tumor_necrosis_factor-mediated_signaling...	0	0	1	1		Alzheimer's_disease	16	tumor_necrosis_factor-mediated_signaling...	1	0	1	1		Alzheimer's_disease	1	tumor_necrosis_factor-mediated_signaling...	0	0	1	1			Alzheimer's_disease	5	tumor_necrosis_factor-mediated_signaling...	0	0	1	1		Alzheimer's_disease	1	tumor_necrosis_factor-mediated_signaling...	1	0	1	1		Alzheimer's_disease
Alzheimer's_disease	0	cell_junction_assembly	0	0	1	1		Alzheimer's_disease	0	cell_junction_assembly	0	0	1	1		Alzheimer's_disease	16	cell_junction_assembly	14	2	1	1		Alzheimer's_disease	1	cell_junction_assembly	0	0	1	1			Alzheimer's_disease	5	cell_junction_assembly	6	1	1	1		Alzheimer's_disease	1	cell_junction_assembly	0	0	1	1		Alzheimer's_disease
Alzheimer's_disease	0	adherens_junction_organization	0	0	1	1		Alzheimer's_disease	0	adherens_junction_organization	0	0	1	1		Alzheimer's_disease	16	adherens_junction_organization	10	2	1	1		Alzheimer's_disease	1	adherens_junction_organization	0	0	1	1			Alzheimer's_disease	5	adherens_junction_organization	6	1	1	1		Alzheimer's_disease	1	adherens_junction_organization	0	0	1	1		Alzheimer's_disease
Alzheimer's_disease	0	social_behavior	0	0	1	1		Alzheimer's_disease	0	social_behavior	0	0	1	1		Alzheimer's_disease	16	social_behavior	7	2	1	1		Alzheimer's_disease	1	social_behavior	0	0	1	1			Alzheimer's_disease	5	social_behavior	1	0	1	1		Alzheimer's_disease	1	social_behavior	0	0	1	1		Alzheimer's_disease
Alzheimer's_disease	0	NIK/NF-kappaB_signaling	0	0	1	1		Alzheimer's_disease	0	NIK/NF-kappaB_signaling	0	0	1	1		Alzheimer's_disease	16	NIK/NF-kappaB_signaling	1	0	1	1		Alzheimer's_disease	1	NIK/NF-kappaB_signaling	0	0	1	1			Alzheimer's_disease	5	NIK/NF-kappaB_signaling	0	0	1	1		Alzheimer's_disease	1	NIK/NF-kappaB_signaling	1	0	1	1		Alzheimer's_disease
Alzheimer's_disease	0	Fc-epsilon_receptor_signaling_pathway	0	0	1	1		Alzheimer's_disease	0	Fc-epsilon_receptor_signaling_pathway	1	0	1	1		Alzheimer's_disease	16	Fc-epsilon_receptor_signaling_pathway	9	6	6.76e-06	0.0162008		Alzheimer's_disease	1	Fc-epsilon_receptor_signaling_pathway	0	0	1	1			Alzheimer's_disease	5	Fc-epsilon_receptor_signaling_pathway	3	2	1	1		Alzheimer's_disease	1	Fc-epsilon_receptor_signaling_pathway	2	0	1	1		Alzheimer's_disease
Alzheimer's_disease	0	Fc-gamma_receptor_signaling_pathway_invo...	0	0	1	1		Alzheimer's_disease	0	Fc-gamma_receptor_signaling_pathway_invo...	0	0	1	1		Alzheimer's_disease	16	Fc-gamma_receptor_signaling_pathway_invo...	4	1	1	1		Alzheimer's_disease	1	Fc-gamma_receptor_signaling_pathway_invo...	1	0	1	1			Alzheimer's_disease	5	Fc-gamma_receptor_signaling_pathway_invo...	4	1	1	1		Alzheimer's_disease	1	Fc-gamma_receptor_signaling_pathway_invo...	1	0	1	1		Alzheimer's_disease
Alzheimer's_disease	0	negative_regulation_of_epidermal_growth_...	0	0	1	1		Alzheimer's_disease	0	negative_regulation_of_epidermal_growth_...	0	0	1	1		Alzheimer's_disease	16	negative_regulation_of_epidermal_growth_...	2	0	1	1		Alzheimer's_disease	1	negative_regulation_of_epidermal_growth_...	0	0	1	1			Alzheimer's_disease	5	negative_regulation_of_epidermal_growth_...	2	0	1	1		Alzheimer's_disease	1	negative_regulation_of_epidermal_growth_...	2	0	1	1		Alzheimer's_disease
Alzheimer's_disease	0	negative_regulation_of_apoptotic_process	0	0	1	1		Alzheimer's_disease	0	negative_regulation_of_apoptotic_process	0	0	1	1		Alzheimer's_disease	16	negative_regulation_of_apoptotic_process	5	3	0.00366537	1		Alzheimer's_disease	1	negative_regulation_of_apoptotic_process	1	0	1	1			Alzheimer's_disease	5	negative_regulation_of_apoptotic_process	5	2	1	1		Alzheimer's_disease	1	negative_regulation_of_apoptotic_process	1	0	1	1		Alzheimer's_disease
Alzheimer's_disease	0	innate_immune_response	1	0	1	1		Alzheimer's_disease	0	innate_immune_response	1	0	1	1		Alzheimer's_disease	16	innate_immune_response	16	7	3.57e-05	0.0516561		Alzheimer's_disease	1	innate_immune_response	2	0	1	1			Alzheimer's_disease	5	innate_immune_response	9	3	0.000116462	0.117303		Alzheimer's_disease	1	innate_immune_response	2	0	1	1		Alzheimer's_disease
Alzheimer's_disease	0	positive_regulation_of_RNA_polymerase_II...	0	0	1	1		Alzheimer's_disease	0	positive_regulation_of_RNA_polymerase_II...	0	0	1	1		Alzheimer's_disease	16	positive_regulation_of_RNA_polymerase_II...	0	0	1	1		Alzheimer's_disease	1	positive_regulation_of_RNA_polymerase_II...	0	0	1	1			Alzheimer's_disease	5	positive_regulation_of_RNA_polymerase_II...	0	0	1	1		Alzheimer's_disease	1	positive_regulation_of_RNA_polymerase_II...	0	0	1	1		Alzheimer's_disease
Alzheimer's_disease	0	GMP_metabolic_process	0	0	1	1		Alzheimer's_disease	0	GMP_metabolic_process	0	0	1	1		Alzheimer's_disease	16	GMP_metabolic_process	4	1	1	1		Alzheimer's_disease	1	GMP_metabolic_process	0	0	1	1			Alzheimer's_disease	5	GMP_metabolic_process	1	0	1	1		Alzheimer's_disease	1	GMP_metabolic_process	0	0	1	1		Alzheimer's_disease
Alzheimer's_disease	0	GDP_metabolic_process	0	0	1	1		Alzheimer's_disease	0	GDP_metabolic_process	0	0	1	1		Alzheimer's_disease	16	GDP_metabolic_process	4	1	1	1		Alzheimer's_disease	1	GDP_metabolic_process	0	0	1	1			Alzheimer's_disease	5	GDP_metabolic_process	1	0	1	1		Alzheimer's_disease	1	GDP_metabolic_process	0	0	1	1		Alzheimer's_disease
Alzheimer's_disease	0	vascular_endothelial_growth_factor_recep...	0	0	1	1		Alzheimer's_disease	0	vascular_endothelial_growth_factor_recep...	1	0	1	1		Alzheimer's_disease	16	vascular_endothelial_growth_factor_recep...	14	7	1.18e-05	0.0222848		Alzheimer's_disease	1	vascular_endothelial_growth_factor_recep...	0	0	1	1			Alzheimer's_disease	5	vascular_endothelial_growth_factor_recep...	6	2	1	1		Alzheimer's_disease	1	vascular_endothelial_growth_factor_recep...	2	0	1	1		Alzheimer's_disease
Alzheimer's_disease	0	neurotrophin_TRK_receptor_signaling_path...	0	0	1	1		Alzheimer's_disease	0	neurotrophin_TRK_receptor_signaling_path...	1	0	1	1		Alzheimer's_disease	16	neurotrophin_TRK_receptor_signaling_path...	10	6	1.6e-05	0.0263709		Alzheimer's_disease	1	neurotrophin_TRK_receptor_signaling_path...	0	0	1	1			Alzheimer's_disease	5	neurotrophin_TRK_receptor_signaling_path...	5	3	1.42e-05	0.0252398		Alzheimer's_disease	1	neurotrophin_TRK_receptor_signaling_path...	2	0	1	1		Alzheimer's_disease
Alzheimer's_disease	0	ephrin_receptor_signaling_pathway	0	0	1	1		Alzheimer's_disease	0	ephrin_receptor_signaling_pathway	0	0	1	1		Alzheimer's_disease	16	ephrin_receptor_signaling_pathway	9	5	0.000167682	0.152004		Alzheimer's_disease	1	ephrin_receptor_signaling_pathway	1	0	1	1			Alzheimer's_disease	5	ephrin_receptor_signaling_pathway	6	1	1	1		Alzheimer's_disease	1	ephrin_receptor_signaling_pathway	0	0	1	1		Alzheimer's_disease
Alzheimer's_disease	0	regulation_of_synaptic_plasticity	0	0	1	1		Alzheimer's_disease	0	regulation_of_synaptic_plasticity	0	0	1	1		Alzheimer's_disease	16	regulation_of_synaptic_plasticity	13	7	6.21e-06	0.0160839		Alzheimer's_disease	1	regulation_of_synaptic_plasticity	1	1	1	1			Alzheimer's_disease	5	regulation_of_synaptic_plasticity	1	0	1	1		Alzheimer's_disease	1	regulation_of_synaptic_plasticity	0	0	1	1		Alzheimer's_disease
Alzheimer's_disease	0	neuromuscular_process_controlling_balanc...	0	0	1	1		Alzheimer's_disease	0	neuromuscular_process_controlling_balanc...	0	0	1	1		Alzheimer's_disease	16	neuromuscular_process_controlling_balanc...	5	1	1	1		Alzheimer's_disease	1	neuromuscular_process_controlling_balanc...	0	0	1	1			Alzheimer's_disease	5	neuromuscular_process_controlling_balanc...	0	0	1	1		Alzheimer's_disease	1	neuromuscular_process_controlling_balanc...	0	0	1	1		Alzheimer's_disease
Alzheimer's_disease	0	actin_filament_bundle_assembly	0	0	1	1		Alzheimer's_disease	0	actin_filament_bundle_assembly	0	0	1	1		Alzheimer's_disease	16	actin_filament_bundle_assembly	7	0	1	1		Alzheimer's_disease	1	actin_filament_bundle_assembly	1	0	1	1			Alzheimer's_disease	5	actin_filament_bundle_assembly	3	1	1	1		Alzheimer's_disease	1	actin_filament_bundle_assembly	0	0	1	1		Alzheimer's_disease
Alzheimer's_disease	0	'de_novo'_posttranslational_protein_fold...	0	0	1	1		Alzheimer's_disease	0	'de_novo'_posttranslational_protein_fold...	0	0	1	1		Alzheimer's_disease	16	'de_novo'_posttranslational_protein_fold...	1	0	1	1		Alzheimer's_disease	1	'de_novo'_posttranslational_protein_fold...	0	0	1	1			Alzheimer's_disease	5	'de_novo'_posttranslational_protein_fold...	2	0	1	1		Alzheimer's_disease	1	'de_novo'_posttranslational_protein_fold...	1	1	1	1		Alzheimer's_disease
Alzheimer's_disease	0	negative_regulation_of_ubiquitin-protein...	0	0	1	1		Alzheimer's_disease	0	negative_regulation_of_ubiquitin-protein...	0	0	1	1		Alzheimer's_disease	16	negative_regulation_of_ubiquitin-protein...	0	0	1	1		Alzheimer's_disease	1	negative_regulation_of_ubiquitin-protein...	0	0	1	1			Alzheimer's_disease	5	negative_regulation_of_ubiquitin-protein...	0	0	1	1		Alzheimer's_disease	1	negative_regulation_of_ubiquitin-protein...	1	0	1	1		Alzheimer's_disease
Alzheimer's_disease	0	positive_regulation_of_ubiquitin-protein...	0	0	1	1		Alzheimer's_disease	0	positive_regulation_of_ubiquitin-protein...	0	0	1	1		Alzheimer's_disease	16	positive_regulation_of_ubiquitin-protein...	0	0	1	1		Alzheimer's_disease	1	positive_regulation_of_ubiquitin-protein...	0	0	1	1			Alzheimer's_disease	5	positive_regulation_of_ubiquitin-protein...	0	0	1	1		Alzheimer's_disease	1	positive_regulation_of_ubiquitin-protein...	1	0	1	1		Alzheimer's_disease
Alzheimer's_disease	0	actin_filament_capping	0	0	1	1		Alzheimer's_disease	0	actin_filament_capping	1	0	1	1		Alzheimer's_disease	16	actin_filament_capping	6	0	1	1		Alzheimer's_disease	1	actin_filament_capping	1	0	1	1			Alzheimer's_disease	5	actin_filament_capping	0	0	1	1		Alzheimer's_disease	1	actin_filament_capping	0	0	1	1		Alzheimer's_disease
Alzheimer's_disease	0	vocalization_behavior	0	0	1	1		Alzheimer's_disease	0	vocalization_behavior	0	0	1	1		Alzheimer's_disease	16	vocalization_behavior	6	1	1	1		Alzheimer's_disease	1	vocalization_behavior	0	0	1	1			Alzheimer's_disease	5	vocalization_behavior	0	0	1	1		Alzheimer's_disease	1	vocalization_behavior	0	0	1	1		Alzheimer's_disease
Alzheimer's_disease	0	negative_regulation_of_canonical_Wnt_sig...	0	0	1	1		Alzheimer's_disease	0	negative_regulation_of_canonical_Wnt_sig...	0	0	1	1		Alzheimer's_disease	16	negative_regulation_of_canonical_Wnt_sig...	3	1	1	1		Alzheimer's_disease	1	negative_regulation_of_canonical_Wnt_sig...	0	0	1	1			Alzheimer's_disease	5	negative_regulation_of_canonical_Wnt_sig...	1	0	1	1		Alzheimer's_disease	1	negative_regulation_of_canonical_Wnt_sig...	1	0	1	1		Alzheimer's_disease
Alzheimer's_disease	0	positive_regulation_of_canonical_Wnt_sig...	0	0	1	1		Alzheimer's_disease	0	positive_regulation_of_canonical_Wnt_sig...	0	0	1	1		Alzheimer's_disease	16	positive_regulation_of_canonical_Wnt_sig...	2	1	1	1		Alzheimer's_disease	1	positive_regulation_of_canonical_Wnt_sig...	0	0	1	1			Alzheimer's_disease	5	positive_regulation_of_canonical_Wnt_sig...	0	0	1	1		Alzheimer's_disease	1	positive_regulation_of_canonical_Wnt_sig...	1	0	1	1		Alzheimer's_disease
Alzheimer's_disease	0	intrinsic_apoptotic_signaling_pathway	0	0	1	1		Alzheimer's_disease	0	intrinsic_apoptotic_signaling_pathway	0	0	1	1		Alzheimer's_disease	16	intrinsic_apoptotic_signaling_pathway	3	1	1	1		Alzheimer's_disease	1	intrinsic_apoptotic_signaling_pathway	0	0	1	1			Alzheimer's_disease	5	intrinsic_apoptotic_signaling_pathway	2	0	1	1		Alzheimer's_disease	1	intrinsic_apoptotic_signaling_pathway	0	0	1	1		Alzheimer's_disease
Alzheimer's_disease	0	toxin_transport	0	0	1	1		Alzheimer's_disease	0	toxin_transport	0	0	1	1		Alzheimer's_disease	16	toxin_transport	0	0	1	1		Alzheimer's_disease	1	toxin_transport	0	0	1	1			Alzheimer's_disease	5	toxin_transport	1	1	1	1		Alzheimer's_disease	1	toxin_transport	0	0	1	1		Alzheimer's_disease
Alzheimer's_disease	0	positive_regulation_of_excitatory_postsy...	0	0	1	1		Alzheimer's_disease	0	positive_regulation_of_excitatory_postsy...	0	0	1	1		Alzheimer's_disease	16	positive_regulation_of_excitatory_postsy...	8	2	1	1		Alzheimer's_disease	1	positive_regulation_of_excitatory_postsy...	0	0	1	1			Alzheimer's_disease	5	positive_regulation_of_excitatory_postsy...	0	0	1	1		Alzheimer's_disease	1	positive_regulation_of_excitatory_postsy...	0	0	1	1		Alzheimer's_disease
peripheral_nervous_system_neoplasm	0	G2/M_transition_of_mitotic_cell_cycle	0	0	1	1		peripheral_nervous_system_neoplasm	0	G2/M_transition_of_mitotic_cell_cycle	0	0	1	1		peripheral_nervous_system_neoplasm	6	G2/M_transition_of_mitotic_cell_cycle	0	0	1	1		peripheral_nervous_system_neoplasm	0	G2/M_transition_of_mitotic_cell_cycle	0	0	1	1			peripheral_nervous_system_neoplasm	3	G2/M_transition_of_mitotic_cell_cycle	2	0	1	1		peripheral_nervous_system_neoplasm	0	G2/M_transition_of_mitotic_cell_cycle	1	0	1	1		peripheral_nervous_system_neoplasm
peripheral_nervous_system_neoplasm	0	nuclear-transcribed_mRNA_catabolic_proce...	0	0	1	1		peripheral_nervous_system_neoplasm	0	nuclear-transcribed_mRNA_catabolic_proce...	0	0	1	1		peripheral_nervous_system_neoplasm	6	nuclear-transcribed_mRNA_catabolic_proce...	0	0	1	1		peripheral_nervous_system_neoplasm	0	nuclear-transcribed_mRNA_catabolic_proce...	0	0	1	1			peripheral_nervous_system_neoplasm	3	nuclear-transcribed_mRNA_catabolic_proce...	1	0	1	1		peripheral_nervous_system_neoplasm	0	nuclear-transcribed_mRNA_catabolic_proce...	0	0	1	1		peripheral_nervous_system_neoplasm
peripheral_nervous_system_neoplasm	0	activation_of_MAPKK_activity	0	0	1	1		peripheral_nervous_system_neoplasm	0	activation_of_MAPKK_activity	1	0	1	1		peripheral_nervous_system_neoplasm	6	activation_of_MAPKK_activity	10	1	1	1		peripheral_nervous_system_neoplasm	0	activation_of_MAPKK_activity	0	0	1	1			peripheral_nervous_system_neoplasm	3	activation_of_MAPKK_activity	3	0	1	1		peripheral_nervous_system_neoplasm	0	activation_of_MAPKK_activity	2	0	1	1		peripheral_nervous_system_neoplasm
peripheral_nervous_system_neoplasm	0	protein_polyubiquitination	0	0	1	1		peripheral_nervous_system_neoplasm	0	protein_polyubiquitination	0	0	1	1		peripheral_nervous_system_neoplasm	6	protein_polyubiquitination	0	0	1	1		peripheral_nervous_system_neoplasm	0	protein_polyubiquitination	0	0	1	1			peripheral_nervous_system_neoplasm	3	protein_polyubiquitination	0	0	1	1		peripheral_nervous_system_neoplasm	0	protein_polyubiquitination	1	0	1	1		peripheral_nervous_system_neoplasm
peripheral_nervous_system_neoplasm	0	stimulatory_C-type_lectin_receptor_signa...	0	0	1	1		peripheral_nervous_system_neoplasm	0	stimulatory_C-type_lectin_receptor_signa...	0	0	1	1		peripheral_nervous_system_neoplasm	6	stimulatory_C-type_lectin_receptor_signa...	1	1	1	1		peripheral_nervous_system_neoplasm	0	stimulatory_C-type_lectin_receptor_signa...	0	0	1	1			peripheral_nervous_system_neoplasm	3	stimulatory_C-type_lectin_receptor_signa...	2	0	1	1		peripheral_nervous_system_neoplasm	0	stimulatory_C-type_lectin_receptor_signa...	1	0	1	1		peripheral_nervous_system_neoplasm
peripheral_nervous_system_neoplasm	0	antigen_processing_and_presentation_of_e...	0	0	1	1		peripheral_nervous_system_neoplasm	0	antigen_processing_and_presentation_of_e...	0	0	1	1		peripheral_nervous_system_neoplasm	6	antigen_processing_and_presentation_of_e...	0	0	1	1		peripheral_nervous_system_neoplasm	0	antigen_processing_and_presentation_of_e...	0	0	1	1			peripheral_nervous_system_neoplasm	3	antigen_processing_and_presentation_of_e...	0	0	1	1		peripheral_nervous_system_neoplasm	0	antigen_processing_and_presentation_of_e...	1	0	1	1		peripheral_nervous_system_neoplasm
peripheral_nervous_system_neoplasm	0	translational_initiation	0	0	1	1		peripheral_nervous_system_neoplasm	0	translational_initiation	0	0	1	1		peripheral_nervous_system_neoplasm	6	translational_initiation	1	0	1	1		peripheral_nervous_system_neoplasm	0	translational_initiation	1	0	1	1			peripheral_nervous_system_neoplasm	3	translational_initiation	2	0	1	1		peripheral_nervous_system_neoplasm	0	translational_initiation	0	0	1	1		peripheral_nervous_system_neoplasm
peripheral_nervous_system_neoplasm	0	regulation_of_cellular_amino_acid_metabo...	0	0	1	1		peripheral_nervous_system_neoplasm	0	regulation_of_cellular_amino_acid_metabo...	0	0	1	1		peripheral_nervous_system_neoplasm	6	regulation_of_cellular_amino_acid_metabo...	0	0	1	1		peripheral_nervous_system_neoplasm	0	regulation_of_cellular_amino_acid_metabo...	0	0	1	1			peripheral_nervous_system_neoplasm	3	regulation_of_cellular_amino_acid_metabo...	0	0	1	1		peripheral_nervous_system_neoplasm	0	regulation_of_cellular_amino_acid_metabo...	0	0	1	1		peripheral_nervous_system_neoplasm
peripheral_nervous_system_neoplasm	0	SRP-dependent_cotranslational_protein_ta...	0	0	1	1		peripheral_nervous_system_neoplasm	0	SRP-dependent_cotranslational_protein_ta...	0	0	1	1		peripheral_nervous_system_neoplasm	6	SRP-dependent_cotranslational_protein_ta...	0	0	1	1		peripheral_nervous_system_neoplasm	0	SRP-dependent_cotranslational_protein_ta...	0	0	1	1			peripheral_nervous_system_neoplasm	3	SRP-dependent_cotranslational_protein_ta...	0	0	1	1		peripheral_nervous_system_neoplasm	0	SRP-dependent_cotranslational_protein_ta...	0	0	1	1		peripheral_nervous_system_neoplasm
peripheral_nervous_system_neoplasm	0	DNA_damage_response,_signal_transduction...	0	0	1	1		peripheral_nervous_system_neoplasm	0	DNA_damage_response,_signal_transduction...	0	0	1	1		peripheral_nervous_system_neoplasm	6	DNA_damage_response,_signal_transduction...	0	0	1	1		peripheral_nervous_system_neoplasm	0	DNA_damage_response,_signal_transduction...	0	0	1	1			peripheral_nervous_system_neoplasm	3	DNA_damage_response,_signal_transduction...	0	0	1	1		peripheral_nervous_system_neoplasm	0	DNA_damage_response,_signal_transduction...	1	0	1	1		peripheral_nervous_system_neoplasm
peripheral_nervous_system_neoplasm	0	epidermal_growth_factor_receptor_signali...	1	0	1	1		peripheral_nervous_system_neoplasm	0	epidermal_growth_factor_receptor_signali...	1	0	1	1		peripheral_nervous_system_neoplasm	6	epidermal_growth_factor_receptor_signali...	12	1	1	1		peripheral_nervous_system_neoplasm	0	epidermal_growth_factor_receptor_signali...	0	0	1	1			peripheral_nervous_system_neoplasm	3	epidermal_growth_factor_receptor_signali...	4	0	1	1		peripheral_nervous_system_neoplasm	0	epidermal_growth_factor_receptor_signali...	2	0	1	1		peripheral_nervous_system_neoplasm
peripheral_nervous_system_neoplasm	0	small_GTPase_mediated_signal_transductio...	0	0	1	1		peripheral_nervous_system_neoplasm	0	small_GTPase_mediated_signal_transductio...	1	0	1	1		peripheral_nervous_system_neoplasm	6	small_GTPase_mediated_signal_transductio...	19	2	1	1		peripheral_nervous_system_neoplasm	0	small_GTPase_mediated_signal_transductio...	1	0	1	1			peripheral_nervous_system_neoplasm	3	small_GTPase_mediated_signal_transductio...	11	1	1	1		peripheral_nervous_system_neoplasm	0	small_GTPase_mediated_signal_transductio...	2	0	1	1		peripheral_nervous_system_neoplasm
peripheral_nervous_system_neoplasm	0	Ras_protein_signal_transduction	0	0	1	1		peripheral_nervous_system_neoplasm	0	Ras_protein_signal_transduction	1	0	1	1		peripheral_nervous_system_neoplasm	6	Ras_protein_signal_transduction	12	1	1	1		peripheral_nervous_system_neoplasm	0	Ras_protein_signal_transduction	0	0	1	1			peripheral_nervous_system_neoplasm	3	Ras_protein_signal_transduction	6	1	1	1		peripheral_nervous_system_neoplasm	0	Ras_protein_signal_transduction	2	0	1	1		peripheral_nervous_system_neoplasm
peripheral_nervous_system_neoplasm	0	synaptic_transmission	0	0	1	1		peripheral_nervous_system_neoplasm	0	synaptic_transmission	0	0	1	1		peripheral_nervous_system_neoplasm	6	synaptic_transmission	27	2	1	1		peripheral_nervous_system_neoplasm	0	synaptic_transmission	1	0	1	1			peripheral_nervous_system_neoplasm	3	synaptic_transmission	4	0	1	1		peripheral_nervous_system_neoplasm	0	synaptic_transmission	1	0	1	1		peripheral_nervous_system_neoplasm
peripheral_nervous_system_neoplasm	0	neurotransmitter_secretion	0	0	1	1		peripheral_nervous_system_neoplasm	0	neurotransmitter_secretion	0	0	1	1		peripheral_nervous_system_neoplasm	6	neurotransmitter_secretion	6	0	1	1		peripheral_nervous_system_neoplasm	0	neurotransmitter_secretion	0	0	1	1			peripheral_nervous_system_neoplasm	3	neurotransmitter_secretion	1	0	1	1		peripheral_nervous_system_neoplasm	0	neurotransmitter_secretion	1	0	1	1		peripheral_nervous_system_neoplasm
peripheral_nervous_system_neoplasm	0	axon_guidance	0	0	1	1		peripheral_nervous_system_neoplasm	0	axon_guidance	1	0	1	1		peripheral_nervous_system_neoplasm	6	axon_guidance	19	1	1	1		peripheral_nervous_system_neoplasm	0	axon_guidance	1	0	1	1			peripheral_nervous_system_neoplasm	3	axon_guidance	9	0	1	1		peripheral_nervous_system_neoplasm	0	axon_guidance	3	0	1	1		peripheral_nervous_system_neoplasm
peripheral_nervous_system_neoplasm	0	synapse_assembly	0	0	1	1		peripheral_nervous_system_neoplasm	0	synapse_assembly	0	0	1	1		peripheral_nervous_system_neoplasm	6	synapse_assembly	9	0	1	1		peripheral_nervous_system_neoplasm	0	synapse_assembly	0	0	1	1			peripheral_nervous_system_neoplasm	3	synapse_assembly	1	0	1	1		peripheral_nervous_system_neoplasm	0	synapse_assembly	0	0	1	1		peripheral_nervous_system_neoplasm
peripheral_nervous_system_neoplasm	0	insulin_receptor_signaling_pathway	0	0	1	1		peripheral_nervous_system_neoplasm	0	insulin_receptor_signaling_pathway	1	0	1	1		peripheral_nervous_system_neoplasm	6	insulin_receptor_signaling_pathway	10	1	1	1		peripheral_nervous_system_neoplasm	0	insulin_receptor_signaling_pathway	0	0	1	1			peripheral_nervous_system_neoplasm	3	insulin_receptor_signaling_pathway	2	0	1	1		peripheral_nervous_system_neoplasm	0	insulin_receptor_signaling_pathway	2	0	1	1		peripheral_nervous_system_neoplasm
peripheral_nervous_system_neoplasm	0	fibroblast_growth_factor_receptor_signal...	0	0	1	1		peripheral_nervous_system_neoplasm	0	fibroblast_growth_factor_receptor_signal...	1	0	1	1		peripheral_nervous_system_neoplasm	6	fibroblast_growth_factor_receptor_signal...	10	2	1	1		peripheral_nervous_system_neoplasm	0	fibroblast_growth_factor_receptor_signal...	0	0	1	1			peripheral_nervous_system_neoplasm	3	fibroblast_growth_factor_receptor_signal...	3	0	1	1		peripheral_nervous_system_neoplasm	0	fibroblast_growth_factor_receptor_signal...	2	0	1	1		peripheral_nervous_system_neoplasm
peripheral_nervous_system_neoplasm	0	proteasomal_ubiquitin-independent_protei...	0	0	1	1		peripheral_nervous_system_neoplasm	0	proteasomal_ubiquitin-independent_protei...	0	0	1	1		peripheral_nervous_system_neoplasm	6	proteasomal_ubiquitin-independent_protei...	0	0	1	1		peripheral_nervous_system_neoplasm	0	proteasomal_ubiquitin-independent_protei...	0	0	1	1			peripheral_nervous_system_neoplasm	3	proteasomal_ubiquitin-independent_protei...	0	0	1	1		peripheral_nervous_system_neoplasm	0	proteasomal_ubiquitin-independent_protei...	0	0	1	1		peripheral_nervous_system_neoplasm
peripheral_nervous_system_neoplasm	0	viral_process	0	0	1	1		peripheral_nervous_system_neoplasm	0	viral_process	0	0	1	1		peripheral_nervous_system_neoplasm	6	viral_process	1	1	1	1		peripheral_nervous_system_neoplasm	0	viral_process	0	0	1	1			peripheral_nervous_system_neoplasm	3	viral_process	4	1	1	1		peripheral_nervous_system_neoplasm	0	viral_process	3	0	1	1		peripheral_nervous_system_neoplasm
peripheral_nervous_system_neoplasm	0	substantia_nigra_development	0	0	1	1		peripheral_nervous_system_neoplasm	0	substantia_nigra_development	0	0	1	1		peripheral_nervous_system_neoplasm	6	substantia_nigra_development	1	0	1	1		peripheral_nervous_system_neoplasm	0	substantia_nigra_development	0	0	1	1			peripheral_nervous_system_neoplasm	3	substantia_nigra_development	5	1	1	1		peripheral_nervous_system_neoplasm	0	substantia_nigra_development	0	0	1	1		peripheral_nervous_system_neoplasm
peripheral_nervous_system_neoplasm	0	platelet_activation	0	0	1	1		peripheral_nervous_system_neoplasm	0	platelet_activation	0	0	1	1		peripheral_nervous_system_neoplasm	6	platelet_activation	5	1	1	1		peripheral_nervous_system_neoplasm	0	platelet_activation	0	0	1	1			peripheral_nervous_system_neoplasm	3	platelet_activation	7	1	1	1		peripheral_nervous_system_neoplasm	0	platelet_activation	1	0	1	1		peripheral_nervous_system_neoplasm
peripheral_nervous_system_neoplasm	0	anaphase-promoting_complex-dependent_pro...	0	0	1	1		peripheral_nervous_system_neoplasm	0	anaphase-promoting_complex-dependent_pro...	0	0	1	1		peripheral_nervous_system_neoplasm	6	anaphase-promoting_complex-dependent_pro...	0	0	1	1		peripheral_nervous_system_neoplasm	0	anaphase-promoting_complex-dependent_pro...	0	0	1	1			peripheral_nervous_system_neoplasm	3	anaphase-promoting_complex-dependent_pro...	1	0	1	1		peripheral_nervous_system_neoplasm	0	anaphase-promoting_complex-dependent_pro...	1	0	1	1		peripheral_nervous_system_neoplasm
peripheral_nervous_system_neoplasm	0	tumor_necrosis_factor-mediated_signaling...	0	0	1	1		peripheral_nervous_system_neoplasm	0	tumor_necrosis_factor-mediated_signaling...	0	0	1	1		peripheral_nervous_system_neoplasm	6	tumor_necrosis_factor-mediated_signaling...	1	0	1	1		peripheral_nervous_system_neoplasm	0	tumor_necrosis_factor-mediated_signaling...	0	0	1	1			peripheral_nervous_system_neoplasm	3	tumor_necrosis_factor-mediated_signaling...	0	0	1	1		peripheral_nervous_system_neoplasm	0	tumor_necrosis_factor-mediated_signaling...	1	0	1	1		peripheral_nervous_system_neoplasm
peripheral_nervous_system_neoplasm	0	cell_junction_assembly	0	0	1	1		peripheral_nervous_system_neoplasm	0	cell_junction_assembly	0	0	1	1		peripheral_nervous_system_neoplasm	6	cell_junction_assembly	14	1	1	1		peripheral_nervous_system_neoplasm	0	cell_junction_assembly	0	0	1	1			peripheral_nervous_system_neoplasm	3	cell_junction_assembly	6	0	1	1		peripheral_nervous_system_neoplasm	0	cell_junction_assembly	0	0	1	1		peripheral_nervous_system_neoplasm
peripheral_nervous_system_neoplasm	0	adherens_junction_organization	0	0	1	1		peripheral_nervous_system_neoplasm	0	adherens_junction_organization	0	0	1	1		peripheral_nervous_system_neoplasm	6	adherens_junction_organization	10	1	1	1		peripheral_nervous_system_neoplasm	0	adherens_junction_organization	0	0	1	1			peripheral_nervous_system_neoplasm	3	adherens_junction_organization	6	0	1	1		peripheral_nervous_system_neoplasm	0	adherens_junction_organization	0	0	1	1		peripheral_nervous_system_neoplasm
peripheral_nervous_system_neoplasm	0	social_behavior	0	0	1	1		peripheral_nervous_system_neoplasm	0	social_behavior	0	0	1	1		peripheral_nervous_system_neoplasm	6	social_behavior	7	0	1	1		peripheral_nervous_system_neoplasm	0	social_behavior	0	0	1	1			peripheral_nervous_system_neoplasm	3	social_behavior	1	0	1	1		peripheral_nervous_system_neoplasm	0	social_behavior	0	0	1	1		peripheral_nervous_system_neoplasm
peripheral_nervous_system_neoplasm	0	NIK/NF-kappaB_signaling	0	0	1	1		peripheral_nervous_system_neoplasm	0	NIK/NF-kappaB_signaling	0	0	1	1		peripheral_nervous_system_neoplasm	6	NIK/NF-kappaB_signaling	1	0	1	1		peripheral_nervous_system_neoplasm	0	NIK/NF-kappaB_signaling	0	0	1	1			peripheral_nervous_system_neoplasm	3	NIK/NF-kappaB_signaling	0	0	1	1		peripheral_nervous_system_neoplasm	0	NIK/NF-kappaB_signaling	1	0	1	1		peripheral_nervous_system_neoplasm
peripheral_nervous_system_neoplasm	0	Fc-epsilon_receptor_signaling_pathway	0	0	1	1		peripheral_nervous_system_neoplasm	0	Fc-epsilon_receptor_signaling_pathway	1	0	1	1		peripheral_nervous_system_neoplasm	6	Fc-epsilon_receptor_signaling_pathway	9	1	1	1		peripheral_nervous_system_neoplasm	0	Fc-epsilon_receptor_signaling_pathway	0	0	1	1			peripheral_nervous_system_neoplasm	3	Fc-epsilon_receptor_signaling_pathway	3	0	1	1		peripheral_nervous_system_neoplasm	0	Fc-epsilon_receptor_signaling_pathway	2	0	1	1		peripheral_nervous_system_neoplasm
peripheral_nervous_system_neoplasm	0	Fc-gamma_receptor_signaling_pathway_invo...	0	0	1	1		peripheral_nervous_system_neoplasm	0	Fc-gamma_receptor_signaling_pathway_invo...	0	0	1	1		peripheral_nervous_system_neoplasm	6	Fc-gamma_receptor_signaling_pathway_invo...	4	1	1	1		peripheral_nervous_system_neoplasm	0	Fc-gamma_receptor_signaling_pathway_invo...	1	0	1	1			peripheral_nervous_system_neoplasm	3	Fc-gamma_receptor_signaling_pathway_invo...	4	0	1	1		peripheral_nervous_system_neoplasm	0	Fc-gamma_receptor_signaling_pathway_invo...	1	0	1	1		peripheral_nervous_system_neoplasm
peripheral_nervous_system_neoplasm	0	negative_regulation_of_epidermal_growth_...	0	0	1	1		peripheral_nervous_system_neoplasm	0	negative_regulation_of_epidermal_growth_...	0	0	1	1		peripheral_nervous_system_neoplasm	6	negative_regulation_of_epidermal_growth_...	2	0	1	1		peripheral_nervous_system_neoplasm	0	negative_regulation_of_epidermal_growth_...	0	0	1	1			peripheral_nervous_system_neoplasm	3	negative_regulation_of_epidermal_growth_...	2	0	1	1		peripheral_nervous_system_neoplasm	0	negative_regulation_of_epidermal_growth_...	2	0	1	1		peripheral_nervous_system_neoplasm
peripheral_nervous_system_neoplasm	0	negative_regulation_of_apoptotic_process	0	0	1	1		peripheral_nervous_system_neoplasm	0	negative_regulation_of_apoptotic_process	0	0	1	1		peripheral_nervous_system_neoplasm	6	negative_regulation_of_apoptotic_process	5	2	1	1		peripheral_nervous_system_neoplasm	0	negative_regulation_of_apoptotic_process	1	0	1	1			peripheral_nervous_system_neoplasm	3	negative_regulation_of_apoptotic_process	5	2	1	1		peripheral_nervous_system_neoplasm	0	negative_regulation_of_apoptotic_process	1	0	1	1		peripheral_nervous_system_neoplasm
peripheral_nervous_system_neoplasm	0	innate_immune_response	1	0	1	1		peripheral_nervous_system_neoplasm	0	innate_immune_response	1	0	1	1		peripheral_nervous_system_neoplasm	6	innate_immune_response	16	3	0.00684452	1		peripheral_nervous_system_neoplasm	0	innate_immune_response	2	0	1	1			peripheral_nervous_system_neoplasm	3	innate_immune_response	9	1	1	1		peripheral_nervous_system_neoplasm	0	innate_immune_response	2	0	1	1		peripheral_nervous_system_neoplasm
peripheral_nervous_system_neoplasm	0	positive_regulation_of_RNA_polymerase_II...	0	0	1	1		peripheral_nervous_system_neoplasm	0	positive_regulation_of_RNA_polymerase_II...	0	0	1	1		peripheral_nervous_system_neoplasm	6	positive_regulation_of_RNA_polymerase_II...	0	0	1	1		peripheral_nervous_system_neoplasm	0	positive_regulation_of_RNA_polymerase_II...	0	0	1	1			peripheral_nervous_system_neoplasm	3	positive_regulation_of_RNA_polymerase_II...	0	0	1	1		peripheral_nervous_system_neoplasm	0	positive_regulation_of_RNA_polymerase_II...	0	0	1	1		peripheral_nervous_system_neoplasm
peripheral_nervous_system_neoplasm	0	GMP_metabolic_process	0	0	1	1		peripheral_nervous_system_neoplasm	0	GMP_metabolic_process	0	0	1	1		peripheral_nervous_system_neoplasm	6	GMP_metabolic_process	4	0	1	1		peripheral_nervous_system_neoplasm	0	GMP_metabolic_process	0	0	1	1			peripheral_nervous_system_neoplasm	3	GMP_metabolic_process	1	0	1	1		peripheral_nervous_system_neoplasm	0	GMP_metabolic_process	0	0	1	1		peripheral_nervous_system_neoplasm
peripheral_nervous_system_neoplasm	0	GDP_metabolic_process	0	0	1	1		peripheral_nervous_system_neoplasm	0	GDP_metabolic_process	0	0	1	1		peripheral_nervous_system_neoplasm	6	GDP_metabolic_process	4	0	1	1		peripheral_nervous_system_neoplasm	0	GDP_metabolic_process	0	0	1	1			peripheral_nervous_system_neoplasm	3	GDP_metabolic_process	1	0	1	1		peripheral_nervous_system_neoplasm	0	GDP_metabolic_process	0	0	1	1		peripheral_nervous_system_neoplasm
peripheral_nervous_system_neoplasm	0	vascular_endothelial_growth_factor_recep...	0	0	1	1		peripheral_nervous_system_neoplasm	0	vascular_endothelial_growth_factor_recep...	1	0	1	1		peripheral_nervous_system_neoplasm	6	vascular_endothelial_growth_factor_recep...	14	1	1	1		peripheral_nervous_system_neoplasm	0	vascular_endothelial_growth_factor_recep...	0	0	1	1			peripheral_nervous_system_neoplasm	3	vascular_endothelial_growth_factor_recep...	6	0	1	1		peripheral_nervous_system_neoplasm	0	vascular_endothelial_growth_factor_recep...	2	0	1	1		peripheral_nervous_system_neoplasm
peripheral_nervous_system_neoplasm	0	neurotrophin_TRK_receptor_signaling_path...	0	0	1	1		peripheral_nervous_system_neoplasm	0	neurotrophin_TRK_receptor_signaling_path...	1	0	1	1		peripheral_nervous_system_neoplasm	6	neurotrophin_TRK_receptor_signaling_path...	10	1	1	1		peripheral_nervous_system_neoplasm	0	neurotrophin_TRK_receptor_signaling_path...	0	0	1	1			peripheral_nervous_system_neoplasm	3	neurotrophin_TRK_receptor_signaling_path...	5	1	1	1		peripheral_nervous_system_neoplasm	0	neurotrophin_TRK_receptor_signaling_path...	2	0	1	1		peripheral_nervous_system_neoplasm
peripheral_nervous_system_neoplasm	0	ephrin_receptor_signaling_pathway	0	0	1	1		peripheral_nervous_system_neoplasm	0	ephrin_receptor_signaling_pathway	0	0	1	1		peripheral_nervous_system_neoplasm	6	ephrin_receptor_signaling_pathway	9	1	1	1		peripheral_nervous_system_neoplasm	0	ephrin_receptor_signaling_pathway	1	0	1	1			peripheral_nervous_system_neoplasm	3	ephrin_receptor_signaling_pathway	6	0	1	1		peripheral_nervous_system_neoplasm	0	ephrin_receptor_signaling_pathway	0	0	1	1		peripheral_nervous_system_neoplasm
peripheral_nervous_system_neoplasm	0	regulation_of_synaptic_plasticity	0	0	1	1		peripheral_nervous_system_neoplasm	0	regulation_of_synaptic_plasticity	0	0	1	1		peripheral_nervous_system_neoplasm	6	regulation_of_synaptic_plasticity	13	0	1	1		peripheral_nervous_system_neoplasm	0	regulation_of_synaptic_plasticity	1	0	1	1			peripheral_nervous_system_neoplasm	3	regulation_of_synaptic_plasticity	1	0	1	1		peripheral_nervous_system_neoplasm	0	regulation_of_synaptic_plasticity	0	0	1	1		peripheral_nervous_system_neoplasm
peripheral_nervous_system_neoplasm	0	neuromuscular_process_controlling_balanc...	0	0	1	1		peripheral_nervous_system_neoplasm	0	neuromuscular_process_controlling_balanc...	0	0	1	1		peripheral_nervous_system_neoplasm	6	neuromuscular_process_controlling_balanc...	5	0	1	1		peripheral_nervous_system_neoplasm	0	neuromuscular_process_controlling_balanc...	0	0	1	1			peripheral_nervous_system_neoplasm	3	neuromuscular_process_controlling_balanc...	0	0	1	1		peripheral_nervous_system_neoplasm	0	neuromuscular_process_controlling_balanc...	0	0	1	1		peripheral_nervous_system_neoplasm
peripheral_nervous_system_neoplasm	0	actin_filament_bundle_assembly	0	0	1	1		peripheral_nervous_system_neoplasm	0	actin_filament_bundle_assembly	0	0	1	1		peripheral_nervous_system_neoplasm	6	actin_filament_bundle_assembly	7	0	1	1		peripheral_nervous_system_neoplasm	0	actin_filament_bundle_assembly	1	0	1	1			peripheral_nervous_system_neoplasm	3	actin_filament_bundle_assembly	3	0	1	1		peripheral_nervous_system_neoplasm	0	actin_filament_bundle_assembly	0	0	1	1		peripheral_nervous_system_neoplasm
peripheral_nervous_system_neoplasm	0	'de_novo'_posttranslational_protein_fold...	0	0	1	1		peripheral_nervous_system_neoplasm	0	'de_novo'_posttranslational_protein_fold...	0	0	1	1		peripheral_nervous_system_neoplasm	6	'de_novo'_posttranslational_protein_fold...	1	0	1	1		peripheral_nervous_system_neoplasm	0	'de_novo'_posttranslational_protein_fold...	0	0	1	1			peripheral_nervous_system_neoplasm	3	'de_novo'_posttranslational_protein_fold...	2	0	1	1		peripheral_nervous_system_neoplasm	0	'de_novo'_posttranslational_protein_fold...	1	0	1	1		peripheral_nervous_system_neoplasm
peripheral_nervous_system_neoplasm	0	negative_regulation_of_ubiquitin-protein...	0	0	1	1		peripheral_nervous_system_neoplasm	0	negative_regulation_of_ubiquitin-protein...	0	0	1	1		peripheral_nervous_system_neoplasm	6	negative_regulation_of_ubiquitin-protein...	0	0	1	1		peripheral_nervous_system_neoplasm	0	negative_regulation_of_ubiquitin-protein...	0	0	1	1			peripheral_nervous_system_neoplasm	3	negative_regulation_of_ubiquitin-protein...	0	0	1	1		peripheral_nervous_system_neoplasm	0	negative_regulation_of_ubiquitin-protein...	1	0	1	1		peripheral_nervous_system_neoplasm
peripheral_nervous_system_neoplasm	0	positive_regulation_of_ubiquitin-protein...	0	0	1	1		peripheral_nervous_system_neoplasm	0	positive_regulation_of_ubiquitin-protein...	0	0	1	1		peripheral_nervous_system_neoplasm	6	positive_regulation_of_ubiquitin-protein...	0	0	1	1		peripheral_nervous_system_neoplasm	0	positive_regulation_of_ubiquitin-protein...	0	0	1	1			peripheral_nervous_system_neoplasm	3	positive_regulation_of_ubiquitin-protein...	0	0	1	1		peripheral_nervous_system_neoplasm	0	positive_regulation_of_ubiquitin-protein...	1	0	1	1		peripheral_nervous_system_neoplasm
peripheral_nervous_system_neoplasm	0	actin_filament_capping	0	0	1	1		peripheral_nervous_system_neoplasm	0	actin_filament_capping	1	0	1	1		peripheral_nervous_system_neoplasm	6	actin_filament_capping	6	0	1	1		peripheral_nervous_system_neoplasm	0	actin_filament_capping	1	0	1	1			peripheral_nervous_system_neoplasm	3	actin_filament_capping	0	0	1	1		peripheral_nervous_system_neoplasm	0	actin_filament_capping	0	0	1	1		peripheral_nervous_system_neoplasm
peripheral_nervous_system_neoplasm	0	vocalization_behavior	0	0	1	1		peripheral_nervous_system_neoplasm	0	vocalization_behavior	0	0	1	1		peripheral_nervous_system_neoplasm	6	vocalization_behavior	6	0	1	1		peripheral_nervous_system_neoplasm	0	vocalization_behavior	0	0	1	1			peripheral_nervous_system_neoplasm	3	vocalization_behavior	0	0	1	1		peripheral_nervous_system_neoplasm	0	vocalization_behavior	0	0	1	1		peripheral_nervous_system_neoplasm
peripheral_nervous_system_neoplasm	0	negative_regulation_of_canonical_Wnt_sig...	0	0	1	1		peripheral_nervous_system_neoplasm	0	negative_regulation_of_canonical_Wnt_sig...	0	0	1	1		peripheral_nervous_system_neoplasm	6	negative_regulation_of_canonical_Wnt_sig...	3	1	1	1		peripheral_nervous_system_neoplasm	0	negative_regulation_of_canonical_Wnt_sig...	0	0	1	1			peripheral_nervous_system_neoplasm	3	negative_regulation_of_canonical_Wnt_sig...	1	0	1	1		peripheral_nervous_system_neoplasm	0	negative_regulation_of_canonical_Wnt_sig...	1	0	1	1		peripheral_nervous_system_neoplasm
peripheral_nervous_system_neoplasm	0	positive_regulation_of_canonical_Wnt_sig...	0	0	1	1		peripheral_nervous_system_neoplasm	0	positive_regulation_of_canonical_Wnt_sig...	0	0	1	1		peripheral_nervous_system_neoplasm	6	positive_regulation_of_canonical_Wnt_sig...	2	1	1	1		peripheral_nervous_system_neoplasm	0	positive_regulation_of_canonical_Wnt_sig...	0	0	1	1			peripheral_nervous_system_neoplasm	3	positive_regulation_of_canonical_Wnt_sig...	0	0	1	1		peripheral_nervous_system_neoplasm	0	positive_regulation_of_canonical_Wnt_sig...	1	0	1	1		peripheral_nervous_system_neoplasm
peripheral_nervous_system_neoplasm	0	intrinsic_apoptotic_signaling_pathway	0	0	1	1		peripheral_nervous_system_neoplasm	0	intrinsic_apoptotic_signaling_pathway	0	0	1	1		peripheral_nervous_system_neoplasm	6	intrinsic_apoptotic_signaling_pathway	3	1	1	1		peripheral_nervous_system_neoplasm	0	intrinsic_apoptotic_signaling_pathway	0	0	1	1			peripheral_nervous_system_neoplasm	3	intrinsic_apoptotic_signaling_pathway	2	0	1	1		peripheral_nervous_system_neoplasm	0	intrinsic_apoptotic_signaling_pathway	0	0	1	1		peripheral_nervous_system_neoplasm
peripheral_nervous_system_neoplasm	0	toxin_transport	0	0	1	1		peripheral_nervous_system_neoplasm	0	toxin_transport	0	0	1	1		peripheral_nervous_system_neoplasm	6	toxin_transport	0	0	1	1		peripheral_nervous_system_neoplasm	0	toxin_transport	0	0	1	1			peripheral_nervous_system_neoplasm	3	toxin_transport	1	1	1	1		peripheral_nervous_system_neoplasm	0	toxin_transport	0	0	1	1		peripheral_nervous_system_neoplasm
peripheral_nervous_system_neoplasm	0	positive_regulation_of_excitatory_postsy...	0	0	1	1		peripheral_nervous_system_neoplasm	0	positive_regulation_of_excitatory_postsy...	0	0	1	1		peripheral_nervous_system_neoplasm	6	positive_regulation_of_excitatory_postsy...	8	0	1	1		peripheral_nervous_system_neoplasm	0	positive_regulation_of_excitatory_postsy...	0	0	1	1			peripheral_nervous_system_neoplasm	3	positive_regulation_of_excitatory_postsy...	0	0	1	1		peripheral_nervous_system_neoplasm	0	positive_regulation_of_excitatory_postsy...	0	0	1	1		peripheral_nervous_system_neoplasm
autistic_disorder	0	G2/M_transition_of_mitotic_cell_cycle	0	0	1	1		autistic_disorder	0	G2/M_transition_of_mitotic_cell_cycle	0	0	1	1		autistic_disorder	11	G2/M_transition_of_mitotic_cell_cycle	0	0	1	1		autistic_disorder	0	G2/M_transition_of_mitotic_cell_cycle	0	0	1	1			autistic_disorder	1	G2/M_transition_of_mitotic_cell_cycle	2	0	1	1		autistic_disorder	0	G2/M_transition_of_mitotic_cell_cycle	1	0	1	1		autistic_disorder
autistic_disorder	0	nuclear-transcribed_mRNA_catabolic_proce...	0	0	1	1		autistic_disorder	0	nuclear-transcribed_mRNA_catabolic_proce...	0	0	1	1		autistic_disorder	11	nuclear-transcribed_mRNA_catabolic_proce...	0	0	1	1		autistic_disorder	0	nuclear-transcribed_mRNA_catabolic_proce...	0	0	1	1			autistic_disorder	1	nuclear-transcribed_mRNA_catabolic_proce...	1	0	1	1		autistic_disorder	0	nuclear-transcribed_mRNA_catabolic_proce...	0	0	1	1		autistic_disorder
autistic_disorder	0	activation_of_MAPKK_activity	0	0	1	1		autistic_disorder	0	activation_of_MAPKK_activity	1	0	1	1		autistic_disorder	11	activation_of_MAPKK_activity	10	2	1	1		autistic_disorder	0	activation_of_MAPKK_activity	0	0	1	1			autistic_disorder	1	activation_of_MAPKK_activity	3	0	1	1		autistic_disorder	0	activation_of_MAPKK_activity	2	0	1	1		autistic_disorder
autistic_disorder	0	protein_polyubiquitination	0	0	1	1		autistic_disorder	0	protein_polyubiquitination	0	0	1	1		autistic_disorder	11	protein_polyubiquitination	0	0	1	1		autistic_disorder	0	protein_polyubiquitination	0	0	1	1			autistic_disorder	1	protein_polyubiquitination	0	0	1	1		autistic_disorder	0	protein_polyubiquitination	1	0	1	1		autistic_disorder
autistic_disorder	0	stimulatory_C-type_lectin_receptor_signa...	0	0	1	1		autistic_disorder	0	stimulatory_C-type_lectin_receptor_signa...	0	0	1	1		autistic_disorder	11	stimulatory_C-type_lectin_receptor_signa...	1	0	1	1		autistic_disorder	0	stimulatory_C-type_lectin_receptor_signa...	0	0	1	1			autistic_disorder	1	stimulatory_C-type_lectin_receptor_signa...	2	0	1	1		autistic_disorder	0	stimulatory_C-type_lectin_receptor_signa...	1	0	1	1		autistic_disorder
autistic_disorder	0	antigen_processing_and_presentation_of_e...	0	0	1	1		autistic_disorder	0	antigen_processing_and_presentation_of_e...	0	0	1	1		autistic_disorder	11	antigen_processing_and_presentation_of_e...	0	0	1	1		autistic_disorder	0	antigen_processing_and_presentation_of_e...	0	0	1	1			autistic_disorder	1	antigen_processing_and_presentation_of_e...	0	0	1	1		autistic_disorder	0	antigen_processing_and_presentation_of_e...	1	0	1	1		autistic_disorder
autistic_disorder	0	translational_initiation	0	0	1	1		autistic_disorder	0	translational_initiation	0	0	1	1		autistic_disorder	11	translational_initiation	1	0	1	1		autistic_disorder	0	translational_initiation	1	0	1	1			autistic_disorder	1	translational_initiation	2	0	1	1		autistic_disorder	0	translational_initiation	0	0	1	1		autistic_disorder
autistic_disorder	0	regulation_of_cellular_amino_acid_metabo...	0	0	1	1		autistic_disorder	0	regulation_of_cellular_amino_acid_metabo...	0	0	1	1		autistic_disorder	11	regulation_of_cellular_amino_acid_metabo...	0	0	1	1		autistic_disorder	0	regulation_of_cellular_amino_acid_metabo...	0	0	1	1			autistic_disorder	1	regulation_of_cellular_amino_acid_metabo...	0	0	1	1		autistic_disorder	0	regulation_of_cellular_amino_acid_metabo...	0	0	1	1		autistic_disorder
autistic_disorder	0	SRP-dependent_cotranslational_protein_ta...	0	0	1	1		autistic_disorder	0	SRP-dependent_cotranslational_protein_ta...	0	0	1	1		autistic_disorder	11	SRP-dependent_cotranslational_protein_ta...	0	0	1	1		autistic_disorder	0	SRP-dependent_cotranslational_protein_ta...	0	0	1	1			autistic_disorder	1	SRP-dependent_cotranslational_protein_ta...	0	0	1	1		autistic_disorder	0	SRP-dependent_cotranslational_protein_ta...	0	0	1	1		autistic_disorder
autistic_disorder	0	DNA_damage_response,_signal_transduction...	0	0	1	1		autistic_disorder	0	DNA_damage_response,_signal_transduction...	0	0	1	1		autistic_disorder	11	DNA_damage_response,_signal_transduction...	0	0	1	1		autistic_disorder	0	DNA_damage_response,_signal_transduction...	0	0	1	1			autistic_disorder	1	DNA_damage_response,_signal_transduction...	0	0	1	1		autistic_disorder	0	DNA_damage_response,_signal_transduction...	1	0	1	1		autistic_disorder
autistic_disorder	0	epidermal_growth_factor_receptor_signali...	1	0	1	1		autistic_disorder	0	epidermal_growth_factor_receptor_signali...	1	0	1	1		autistic_disorder	11	epidermal_growth_factor_receptor_signali...	12	2	1	1		autistic_disorder	0	epidermal_growth_factor_receptor_signali...	0	0	1	1			autistic_disorder	1	epidermal_growth_factor_receptor_signali...	4	0	1	1		autistic_disorder	0	epidermal_growth_factor_receptor_signali...	2	0	1	1		autistic_disorder
autistic_disorder	0	small_GTPase_mediated_signal_transductio...	0	0	1	1		autistic_disorder	0	small_GTPase_mediated_signal_transductio...	1	0	1	1		autistic_disorder	11	small_GTPase_mediated_signal_transductio...	19	4	0.011033	1		autistic_disorder	0	small_GTPase_mediated_signal_transductio...	1	0	1	1			autistic_disorder	1	small_GTPase_mediated_signal_transductio...	11	1	1	1		autistic_disorder	0	small_GTPase_mediated_signal_transductio...	2	0	1	1		autistic_disorder
autistic_disorder	0	Ras_protein_signal_transduction	0	0	1	1		autistic_disorder	0	Ras_protein_signal_transduction	1	0	1	1		autistic_disorder	11	Ras_protein_signal_transduction	12	2	1	1		autistic_disorder	0	Ras_protein_signal_transduction	0	0	1	1			autistic_disorder	1	Ras_protein_signal_transduction	6	1	1	1		autistic_disorder	0	Ras_protein_signal_transduction	2	0	1	1		autistic_disorder
autistic_disorder	0	synaptic_transmission	0	0	1	1		autistic_disorder	0	synaptic_transmission	0	0	1	1		autistic_disorder	11	synaptic_transmission	27	10	3.58e-09	6.90752e-05	***	autistic_disorder	0	synaptic_transmission	1	0	1	1			autistic_disorder	1	synaptic_transmission	4	1	1	1		autistic_disorder	0	synaptic_transmission	1	0	1	1		autistic_disorder
autistic_disorder	0	neurotransmitter_secretion	0	0	1	1		autistic_disorder	0	neurotransmitter_secretion	0	0	1	1		autistic_disorder	11	neurotransmitter_secretion	6	1	1	1		autistic_disorder	0	neurotransmitter_secretion	0	0	1	1			autistic_disorder	1	neurotransmitter_secretion	1	0	1	1		autistic_disorder	0	neurotransmitter_secretion	1	0	1	1		autistic_disorder
autistic_disorder	0	axon_guidance	0	0	1	1		autistic_disorder	0	axon_guidance	1	0	1	1		autistic_disorder	11	axon_guidance	19	3	0.060337	1		autistic_disorder	0	axon_guidance	1	0	1	1			autistic_disorder	1	axon_guidance	9	1	1	1		autistic_disorder	0	axon_guidance	3	0	1	1		autistic_disorder
autistic_disorder	0	synapse_assembly	0	0	1	1		autistic_disorder	0	synapse_assembly	0	0	1	1		autistic_disorder	11	synapse_assembly	9	4	0.000524763	0.389916		autistic_disorder	0	synapse_assembly	0	0	1	1			autistic_disorder	1	synapse_assembly	1	0	1	1		autistic_disorder	0	synapse_assembly	0	0	1	1		autistic_disorder
autistic_disorder	0	insulin_receptor_signaling_pathway	0	0	1	1		autistic_disorder	0	insulin_receptor_signaling_pathway	1	0	1	1		autistic_disorder	11	insulin_receptor_signaling_pathway	10	3	0.0110757	1		autistic_disorder	0	insulin_receptor_signaling_pathway	0	0	1	1			autistic_disorder	1	insulin_receptor_signaling_pathway	2	0	1	1		autistic_disorder	0	insulin_receptor_signaling_pathway	2	0	1	1		autistic_disorder
autistic_disorder	0	fibroblast_growth_factor_receptor_signal...	0	0	1	1		autistic_disorder	0	fibroblast_growth_factor_receptor_signal...	1	0	1	1		autistic_disorder	11	fibroblast_growth_factor_receptor_signal...	10	3	0.0110757	1		autistic_disorder	0	fibroblast_growth_factor_receptor_signal...	0	0	1	1			autistic_disorder	1	fibroblast_growth_factor_receptor_signal...	3	0	1	1		autistic_disorder	0	fibroblast_growth_factor_receptor_signal...	2	0	1	1		autistic_disorder
autistic_disorder	0	proteasomal_ubiquitin-independent_protei...	0	0	1	1		autistic_disorder	0	proteasomal_ubiquitin-independent_protei...	0	0	1	1		autistic_disorder	11	proteasomal_ubiquitin-independent_protei...	0	0	1	1		autistic_disorder	0	proteasomal_ubiquitin-independent_protei...	0	0	1	1			autistic_disorder	1	proteasomal_ubiquitin-independent_protei...	0	0	1	1		autistic_disorder	0	proteasomal_ubiquitin-independent_protei...	0	0	1	1		autistic_disorder
autistic_disorder	0	viral_process	0	0	1	1		autistic_disorder	0	viral_process	0	0	1	1		autistic_disorder	11	viral_process	1	0	1	1		autistic_disorder	0	viral_process	0	0	1	1			autistic_disorder	1	viral_process	4	1	1	1		autistic_disorder	0	viral_process	3	0	1	1		autistic_disorder
autistic_disorder	0	substantia_nigra_development	0	0	1	1		autistic_disorder	0	substantia_nigra_development	0	0	1	1		autistic_disorder	11	substantia_nigra_development	1	0	1	1		autistic_disorder	0	substantia_nigra_development	0	0	1	1			autistic_disorder	1	substantia_nigra_development	5	0	1	1		autistic_disorder	0	substantia_nigra_development	0	0	1	1		autistic_disorder
autistic_disorder	0	platelet_activation	0	0	1	1		autistic_disorder	0	platelet_activation	0	0	1	1		autistic_disorder	11	platelet_activation	5	0	1	1		autistic_disorder	0	platelet_activation	0	0	1	1			autistic_disorder	1	platelet_activation	7	1	1	1		autistic_disorder	0	platelet_activation	1	0	1	1		autistic_disorder
autistic_disorder	0	anaphase-promoting_complex-dependent_pro...	0	0	1	1		autistic_disorder	0	anaphase-promoting_complex-dependent_pro...	0	0	1	1		autistic_disorder	11	anaphase-promoting_complex-dependent_pro...	0	0	1	1		autistic_disorder	0	anaphase-promoting_complex-dependent_pro...	0	0	1	1			autistic_disorder	1	anaphase-promoting_complex-dependent_pro...	1	0	1	1		autistic_disorder	0	anaphase-promoting_complex-dependent_pro...	1	0	1	1		autistic_disorder
autistic_disorder	0	tumor_necrosis_factor-mediated_signaling...	0	0	1	1		autistic_disorder	0	tumor_necrosis_factor-mediated_signaling...	0	0	1	1		autistic_disorder	11	tumor_necrosis_factor-mediated_signaling...	1	0	1	1		autistic_disorder	0	tumor_necrosis_factor-mediated_signaling...	0	0	1	1			autistic_disorder	1	tumor_necrosis_factor-mediated_signaling...	0	0	1	1		autistic_disorder	0	tumor_necrosis_factor-mediated_signaling...	1	0	1	1		autistic_disorder
autistic_disorder	0	cell_junction_assembly	0	0	1	1		autistic_disorder	0	cell_junction_assembly	0	0	1	1		autistic_disorder	11	cell_junction_assembly	14	2	1	1		autistic_disorder	0	cell_junction_assembly	0	0	1	1			autistic_disorder	1	cell_junction_assembly	6	1	1	1		autistic_disorder	0	cell_junction_assembly	0	0	1	1		autistic_disorder
autistic_disorder	0	adherens_junction_organization	0	0	1	1		autistic_disorder	0	adherens_junction_organization	0	0	1	1		autistic_disorder	11	adherens_junction_organization	10	2	1	1		autistic_disorder	0	adherens_junction_organization	0	0	1	1			autistic_disorder	1	adherens_junction_organization	6	1	1	1		autistic_disorder	0	adherens_junction_organization	0	0	1	1		autistic_disorder
autistic_disorder	0	social_behavior	0	0	1	1		autistic_disorder	0	social_behavior	0	0	1	1		autistic_disorder	11	social_behavior	7	4	0.000156915	0.14817		autistic_disorder	0	social_behavior	0	0	1	1			autistic_disorder	1	social_behavior	1	0	1	1		autistic_disorder	0	social_behavior	0	0	1	1		autistic_disorder
autistic_disorder	0	NIK/NF-kappaB_signaling	0	0	1	1		autistic_disorder	0	NIK/NF-kappaB_signaling	0	0	1	1		autistic_disorder	11	NIK/NF-kappaB_signaling	1	0	1	1		autistic_disorder	0	NIK/NF-kappaB_signaling	0	0	1	1			autistic_disorder	1	NIK/NF-kappaB_signaling	0	0	1	1		autistic_disorder	0	NIK/NF-kappaB_signaling	1	0	1	1		autistic_disorder
autistic_disorder	0	Fc-epsilon_receptor_signaling_pathway	0	0	1	1		autistic_disorder	0	Fc-epsilon_receptor_signaling_pathway	1	0	1	1		autistic_disorder	11	Fc-epsilon_receptor_signaling_pathway	9	2	1	1		autistic_disorder	0	Fc-epsilon_receptor_signaling_pathway	0	0	1	1			autistic_disorder	1	Fc-epsilon_receptor_signaling_pathway	3	1	1	1		autistic_disorder	0	Fc-epsilon_receptor_signaling_pathway	2	0	1	1		autistic_disorder
autistic_disorder	0	Fc-gamma_receptor_signaling_pathway_invo...	0	0	1	1		autistic_disorder	0	Fc-gamma_receptor_signaling_pathway_invo...	0	0	1	1		autistic_disorder	11	Fc-gamma_receptor_signaling_pathway_invo...	4	1	1	1		autistic_disorder	0	Fc-gamma_receptor_signaling_pathway_invo...	1	0	1	1			autistic_disorder	1	Fc-gamma_receptor_signaling_pathway_invo...	4	1	1	1		autistic_disorder	0	Fc-gamma_receptor_signaling_pathway_invo...	1	0	1	1		autistic_disorder
autistic_disorder	0	negative_regulation_of_epidermal_growth_...	0	0	1	1		autistic_disorder	0	negative_regulation_of_epidermal_growth_...	0	0	1	1		autistic_disorder	11	negative_regulation_of_epidermal_growth_...	2	0	1	1		autistic_disorder	0	negative_regulation_of_epidermal_growth_...	0	0	1	1			autistic_disorder	1	negative_regulation_of_epidermal_growth_...	2	0	1	1		autistic_disorder	0	negative_regulation_of_epidermal_growth_...	2	0	1	1		autistic_disorder
autistic_disorder	0	negative_regulation_of_apoptotic_process	0	0	1	1		autistic_disorder	0	negative_regulation_of_apoptotic_process	0	0	1	1		autistic_disorder	11	negative_regulation_of_apoptotic_process	5	1	1	1		autistic_disorder	0	negative_regulation_of_apoptotic_process	1	0	1	1			autistic_disorder	1	negative_regulation_of_apoptotic_process	5	0	1	1		autistic_disorder	0	negative_regulation_of_apoptotic_process	1	0	1	1		autistic_disorder
autistic_disorder	0	innate_immune_response	1	0	1	1		autistic_disorder	0	innate_immune_response	1	0	1	1		autistic_disorder	11	innate_immune_response	16	4	0.00581993	1		autistic_disorder	0	innate_immune_response	2	0	1	1			autistic_disorder	1	innate_immune_response	9	1	1	1		autistic_disorder	0	innate_immune_response	2	0	1	1		autistic_disorder
autistic_disorder	0	positive_regulation_of_RNA_polymerase_II...	0	0	1	1		autistic_disorder	0	positive_regulation_of_RNA_polymerase_II...	0	0	1	1		autistic_disorder	11	positive_regulation_of_RNA_polymerase_II...	0	0	1	1		autistic_disorder	0	positive_regulation_of_RNA_polymerase_II...	0	0	1	1			autistic_disorder	1	positive_regulation_of_RNA_polymerase_II...	0	0	1	1		autistic_disorder	0	positive_regulation_of_RNA_polymerase_II...	0	0	1	1		autistic_disorder
autistic_disorder	0	GMP_metabolic_process	0	0	1	1		autistic_disorder	0	GMP_metabolic_process	0	0	1	1		autistic_disorder	11	GMP_metabolic_process	4	0	1	1		autistic_disorder	0	GMP_metabolic_process	0	0	1	1			autistic_disorder	1	GMP_metabolic_process	1	0	1	1		autistic_disorder	0	GMP_metabolic_process	0	0	1	1		autistic_disorder
autistic_disorder	0	GDP_metabolic_process	0	0	1	1		autistic_disorder	0	GDP_metabolic_process	0	0	1	1		autistic_disorder	11	GDP_metabolic_process	4	0	1	1		autistic_disorder	0	GDP_metabolic_process	0	0	1	1			autistic_disorder	1	GDP_metabolic_process	1	0	1	1		autistic_disorder	0	GDP_metabolic_process	0	0	1	1		autistic_disorder
autistic_disorder	0	vascular_endothelial_growth_factor_recep...	0	0	1	1		autistic_disorder	0	vascular_endothelial_growth_factor_recep...	1	0	1	1		autistic_disorder	11	vascular_endothelial_growth_factor_recep...	14	4	0.00345549	1		autistic_disorder	0	vascular_endothelial_growth_factor_recep...	0	0	1	1			autistic_disorder	1	vascular_endothelial_growth_factor_recep...	6	1	1	1		autistic_disorder	0	vascular_endothelial_growth_factor_recep...	2	0	1	1		autistic_disorder
autistic_disorder	0	neurotrophin_TRK_receptor_signaling_path...	0	0	1	1		autistic_disorder	0	neurotrophin_TRK_receptor_signaling_path...	1	0	1	1		autistic_disorder	11	neurotrophin_TRK_receptor_signaling_path...	10	2	1	1		autistic_disorder	0	neurotrophin_TRK_receptor_signaling_path...	0	0	1	1			autistic_disorder	1	neurotrophin_TRK_receptor_signaling_path...	5	1	1	1		autistic_disorder	0	neurotrophin_TRK_receptor_signaling_path...	2	0	1	1		autistic_disorder
autistic_disorder	0	ephrin_receptor_signaling_pathway	0	0	1	1		autistic_disorder	0	ephrin_receptor_signaling_pathway	0	0	1	1		autistic_disorder	11	ephrin_receptor_signaling_pathway	9	1	1	1		autistic_disorder	0	ephrin_receptor_signaling_pathway	1	0	1	1			autistic_disorder	1	ephrin_receptor_signaling_pathway	6	1	1	1		autistic_disorder	0	ephrin_receptor_signaling_pathway	0	0	1	1		autistic_disorder
autistic_disorder	0	regulation_of_synaptic_plasticity	0	0	1	1		autistic_disorder	0	regulation_of_synaptic_plasticity	0	0	1	1		autistic_disorder	11	regulation_of_synaptic_plasticity	13	6	7.76e-06	0.0171572		autistic_disorder	0	regulation_of_synaptic_plasticity	1	0	1	1			autistic_disorder	1	regulation_of_synaptic_plasticity	1	0	1	1		autistic_disorder	0	regulation_of_synaptic_plasticity	0	0	1	1		autistic_disorder
autistic_disorder	0	neuromuscular_process_controlling_balanc...	0	0	1	1		autistic_disorder	0	neuromuscular_process_controlling_balanc...	0	0	1	1		autistic_disorder	11	neuromuscular_process_controlling_balanc...	5	1	1	1		autistic_disorder	0	neuromuscular_process_controlling_balanc...	0	0	1	1			autistic_disorder	1	neuromuscular_process_controlling_balanc...	0	0	1	1		autistic_disorder	0	neuromuscular_process_controlling_balanc...	0	0	1	1		autistic_disorder
autistic_disorder	0	actin_filament_bundle_assembly	0	0	1	1		autistic_disorder	0	actin_filament_bundle_assembly	0	0	1	1		autistic_disorder	11	actin_filament_bundle_assembly	7	2	1	1		autistic_disorder	0	actin_filament_bundle_assembly	1	0	1	1			autistic_disorder	1	actin_filament_bundle_assembly	3	1	1	1		autistic_disorder	0	actin_filament_bundle_assembly	0	0	1	1		autistic_disorder
autistic_disorder	0	'de_novo'_posttranslational_protein_fold...	0	0	1	1		autistic_disorder	0	'de_novo'_posttranslational_protein_fold...	0	0	1	1		autistic_disorder	11	'de_novo'_posttranslational_protein_fold...	1	0	1	1		autistic_disorder	0	'de_novo'_posttranslational_protein_fold...	0	0	1	1			autistic_disorder	1	'de_novo'_posttranslational_protein_fold...	2	0	1	1		autistic_disorder	0	'de_novo'_posttranslational_protein_fold...	1	0	1	1		autistic_disorder
autistic_disorder	0	negative_regulation_of_ubiquitin-protein...	0	0	1	1		autistic_disorder	0	negative_regulation_of_ubiquitin-protein...	0	0	1	1		autistic_disorder	11	negative_regulation_of_ubiquitin-protein...	0	0	1	1		autistic_disorder	0	negative_regulation_of_ubiquitin-protein...	0	0	1	1			autistic_disorder	1	negative_regulation_of_ubiquitin-protein...	0	0	1	1		autistic_disorder	0	negative_regulation_of_ubiquitin-protein...	1	0	1	1		autistic_disorder
autistic_disorder	0	positive_regulation_of_ubiquitin-protein...	0	0	1	1		autistic_disorder	0	positive_regulation_of_ubiquitin-protein...	0	0	1	1		autistic_disorder	11	positive_regulation_of_ubiquitin-protein...	0	0	1	1		autistic_disorder	0	positive_regulation_of_ubiquitin-protein...	0	0	1	1			autistic_disorder	1	positive_regulation_of_ubiquitin-protein...	0	0	1	1		autistic_disorder	0	positive_regulation_of_ubiquitin-protein...	1	0	1	1		autistic_disorder
autistic_disorder	0	actin_filament_capping	0	0	1	1		autistic_disorder	0	actin_filament_capping	1	0	1	1		autistic_disorder	11	actin_filament_capping	6	0	1	1		autistic_disorder	0	actin_filament_capping	1	0	1	1			autistic_disorder	1	actin_filament_capping	0	0	1	1		autistic_disorder	0	actin_filament_capping	0	0	1	1		autistic_disorder
autistic_disorder	0	vocalization_behavior	0	0	1	1		autistic_disorder	0	vocalization_behavior	0	0	1	1		autistic_disorder	11	vocalization_behavior	6	4	6.98e-05	0.0843649		autistic_disorder	0	vocalization_behavior	0	0	1	1			autistic_disorder	1	vocalization_behavior	0	0	1	1		autistic_disorder	0	vocalization_behavior	0	0	1	1		autistic_disorder
autistic_disorder	0	negative_regulation_of_canonical_Wnt_sig...	0	0	1	1		autistic_disorder	0	negative_regulation_of_canonical_Wnt_sig...	0	0	1	1		autistic_disorder	11	negative_regulation_of_canonical_Wnt_sig...	3	1	1	1		autistic_disorder	0	negative_regulation_of_canonical_Wnt_sig...	0	0	1	1			autistic_disorder	1	negative_regulation_of_canonical_Wnt_sig...	1	0	1	1		autistic_disorder	0	negative_regulation_of_canonical_Wnt_sig...	1	0	1	1		autistic_disorder
autistic_disorder	0	positive_regulation_of_canonical_Wnt_sig...	0	0	1	1		autistic_disorder	0	positive_regulation_of_canonical_Wnt_sig...	0	0	1	1		autistic_disorder	11	positive_regulation_of_canonical_Wnt_sig...	2	1	1	1		autistic_disorder	0	positive_regulation_of_canonical_Wnt_sig...	0	0	1	1			autistic_disorder	1	positive_regulation_of_canonical_Wnt_sig...	0	0	1	1		autistic_disorder	0	positive_regulation_of_canonical_Wnt_sig...	1	0	1	1		autistic_disorder
autistic_disorder	0	intrinsic_apoptotic_signaling_pathway	0	0	1	1		autistic_disorder	0	intrinsic_apoptotic_signaling_pathway	0	0	1	1		autistic_disorder	11	intrinsic_apoptotic_signaling_pathway	3	0	1	1		autistic_disorder	0	intrinsic_apoptotic_signaling_pathway	0	0	1	1			autistic_disorder	1	intrinsic_apoptotic_signaling_pathway	2	0	1	1		autistic_disorder	0	intrinsic_apoptotic_signaling_pathway	0	0	1	1		autistic_disorder
autistic_disorder	0	toxin_transport	0	0	1	1		autistic_disorder	0	toxin_transport	0	0	1	1		autistic_disorder	11	toxin_transport	0	0	1	1		autistic_disorder	0	toxin_transport	0	0	1	1			autistic_disorder	1	toxin_transport	1	0	1	1		autistic_disorder	0	toxin_transport	0	0	1	1		autistic_disorder
autistic_disorder	0	positive_regulation_of_excitatory_postsy...	0	0	1	1		autistic_disorder	0	positive_regulation_of_excitatory_postsy...	0	0	1	1		autistic_disorder	11	positive_regulation_of_excitatory_postsy...	8	3	0.00562663	1		autistic_disorder	0	positive_regulation_of_excitatory_postsy...	0	0	1	1			autistic_disorder	1	positive_regulation_of_excitatory_postsy...	0	0	1	1		autistic_disorder	0	positive_regulation_of_excitatory_postsy...	0	0	1	1		autistic_disorder
Huntington's_disease	0	G2/M_transition_of_mitotic_cell_cycle	0	0	1	1		Huntington's_disease	0	G2/M_transition_of_mitotic_cell_cycle	0	0	1	1		Huntington's_disease	3	G2/M_transition_of_mitotic_cell_cycle	0	0	1	1		Huntington's_disease	0	G2/M_transition_of_mitotic_cell_cycle	0	0	1	1			Huntington's_disease	1	G2/M_transition_of_mitotic_cell_cycle	2	0	1	1		Huntington's_disease	0	G2/M_transition_of_mitotic_cell_cycle	1	0	1	1		Huntington's_disease
Huntington's_disease	0	nuclear-transcribed_mRNA_catabolic_proce...	0	0	1	1		Huntington's_disease	0	nuclear-transcribed_mRNA_catabolic_proce...	0	0	1	1		Huntington's_disease	3	nuclear-transcribed_mRNA_catabolic_proce...	0	0	1	1		Huntington's_disease	0	nuclear-transcribed_mRNA_catabolic_proce...	0	0	1	1			Huntington's_disease	1	nuclear-transcribed_mRNA_catabolic_proce...	1	0	1	1		Huntington's_disease	0	nuclear-transcribed_mRNA_catabolic_proce...	0	0	1	1		Huntington's_disease
Huntington's_disease	0	activation_of_MAPKK_activity	0	0	1	1		Huntington's_disease	0	activation_of_MAPKK_activity	1	0	1	1		Huntington's_disease	3	activation_of_MAPKK_activity	10	2	1	1		Huntington's_disease	0	activation_of_MAPKK_activity	0	0	1	1			Huntington's_disease	1	activation_of_MAPKK_activity	3	0	1	1		Huntington's_disease	0	activation_of_MAPKK_activity	2	0	1	1		Huntington's_disease
Huntington's_disease	0	protein_polyubiquitination	0	0	1	1		Huntington's_disease	0	protein_polyubiquitination	0	0	1	1		Huntington's_disease	3	protein_polyubiquitination	0	0	1	1		Huntington's_disease	0	protein_polyubiquitination	0	0	1	1			Huntington's_disease	1	protein_polyubiquitination	0	0	1	1		Huntington's_disease	0	protein_polyubiquitination	1	0	1	1		Huntington's_disease
Huntington's_disease	0	stimulatory_C-type_lectin_receptor_signa...	0	0	1	1		Huntington's_disease	0	stimulatory_C-type_lectin_receptor_signa...	0	0	1	1		Huntington's_disease	3	stimulatory_C-type_lectin_receptor_signa...	1	0	1	1		Huntington's_disease	0	stimulatory_C-type_lectin_receptor_signa...	0	0	1	1			Huntington's_disease	1	stimulatory_C-type_lectin_receptor_signa...	2	0	1	1		Huntington's_disease	0	stimulatory_C-type_lectin_receptor_signa...	1	0	1	1		Huntington's_disease
Huntington's_disease	0	antigen_processing_and_presentation_of_e...	0	0	1	1		Huntington's_disease	0	antigen_processing_and_presentation_of_e...	0	0	1	1		Huntington's_disease	3	antigen_processing_and_presentation_of_e...	0	0	1	1		Huntington's_disease	0	antigen_processing_and_presentation_of_e...	0	0	1	1			Huntington's_disease	1	antigen_processing_and_presentation_of_e...	0	0	1	1		Huntington's_disease	0	antigen_processing_and_presentation_of_e...	1	0	1	1		Huntington's_disease
Huntington's_disease	0	translational_initiation	0	0	1	1		Huntington's_disease	0	translational_initiation	0	0	1	1		Huntington's_disease	3	translational_initiation	1	0	1	1		Huntington's_disease	0	translational_initiation	1	0	1	1			Huntington's_disease	1	translational_initiation	2	0	1	1		Huntington's_disease	0	translational_initiation	0	0	1	1		Huntington's_disease
Huntington's_disease	0	regulation_of_cellular_amino_acid_metabo...	0	0	1	1		Huntington's_disease	0	regulation_of_cellular_amino_acid_metabo...	0	0	1	1		Huntington's_disease	3	regulation_of_cellular_amino_acid_metabo...	0	0	1	1		Huntington's_disease	0	regulation_of_cellular_amino_acid_metabo...	0	0	1	1			Huntington's_disease	1	regulation_of_cellular_amino_acid_metabo...	0	0	1	1		Huntington's_disease	0	regulation_of_cellular_amino_acid_metabo...	0	0	1	1		Huntington's_disease
Huntington's_disease	0	SRP-dependent_cotranslational_protein_ta...	0	0	1	1		Huntington's_disease	0	SRP-dependent_cotranslational_protein_ta...	0	0	1	1		Huntington's_disease	3	SRP-dependent_cotranslational_protein_ta...	0	0	1	1		Huntington's_disease	0	SRP-dependent_cotranslational_protein_ta...	0	0	1	1			Huntington's_disease	1	SRP-dependent_cotranslational_protein_ta...	0	0	1	1		Huntington's_disease	0	SRP-dependent_cotranslational_protein_ta...	0	0	1	1		Huntington's_disease
Huntington's_disease	0	DNA_damage_response,_signal_transduction...	0	0	1	1		Huntington's_disease	0	DNA_damage_response,_signal_transduction...	0	0	1	1		Huntington's_disease	3	DNA_damage_response,_signal_transduction...	0	0	1	1		Huntington's_disease	0	DNA_damage_response,_signal_transduction...	0	0	1	1			Huntington's_disease	1	DNA_damage_response,_signal_transduction...	0	0	1	1		Huntington's_disease	0	DNA_damage_response,_signal_transduction...	1	0	1	1		Huntington's_disease
Huntington's_disease	0	epidermal_growth_factor_receptor_signali...	1	0	1	1		Huntington's_disease	0	epidermal_growth_factor_receptor_signali...	1	0	1	1		Huntington's_disease	3	epidermal_growth_factor_receptor_signali...	12	2	1	1		Huntington's_disease	0	epidermal_growth_factor_receptor_signali...	0	0	1	1			Huntington's_disease	1	epidermal_growth_factor_receptor_signali...	4	0	1	1		Huntington's_disease	0	epidermal_growth_factor_receptor_signali...	2	0	1	1		Huntington's_disease
Huntington's_disease	0	small_GTPase_mediated_signal_transductio...	0	0	1	1		Huntington's_disease	0	small_GTPase_mediated_signal_transductio...	1	0	1	1		Huntington's_disease	3	small_GTPase_mediated_signal_transductio...	19	2	1	1		Huntington's_disease	0	small_GTPase_mediated_signal_transductio...	1	0	1	1			Huntington's_disease	1	small_GTPase_mediated_signal_transductio...	11	0	1	1		Huntington's_disease	0	small_GTPase_mediated_signal_transductio...	2	0	1	1		Huntington's_disease
Huntington's_disease	0	Ras_protein_signal_transduction	0	0	1	1		Huntington's_disease	0	Ras_protein_signal_transduction	1	0	1	1		Huntington's_disease	3	Ras_protein_signal_transduction	12	2	1	1		Huntington's_disease	0	Ras_protein_signal_transduction	0	0	1	1			Huntington's_disease	1	Ras_protein_signal_transduction	6	0	1	1		Huntington's_disease	0	Ras_protein_signal_transduction	2	0	1	1		Huntington's_disease
Huntington's_disease	0	synaptic_transmission	0	0	1	1		Huntington's_disease	0	synaptic_transmission	0	0	1	1		Huntington's_disease	3	synaptic_transmission	27	2	1	1		Huntington's_disease	0	synaptic_transmission	1	0	1	1			Huntington's_disease	1	synaptic_transmission	4	0	1	1		Huntington's_disease	0	synaptic_transmission	1	0	1	1		Huntington's_disease
Huntington's_disease	0	neurotransmitter_secretion	0	0	1	1		Huntington's_disease	0	neurotransmitter_secretion	0	0	1	1		Huntington's_disease	3	neurotransmitter_secretion	6	0	1	1		Huntington's_disease	0	neurotransmitter_secretion	0	0	1	1			Huntington's_disease	1	neurotransmitter_secretion	1	0	1	1		Huntington's_disease	0	neurotransmitter_secretion	1	0	1	1		Huntington's_disease
Huntington's_disease	0	axon_guidance	0	0	1	1		Huntington's_disease	0	axon_guidance	1	0	1	1		Huntington's_disease	3	axon_guidance	19	3	0.000726768	0.50678		Huntington's_disease	0	axon_guidance	1	0	1	1			Huntington's_disease	1	axon_guidance	9	0	1	1		Huntington's_disease	0	axon_guidance	3	0	1	1		Huntington's_disease
Huntington's_disease	0	synapse_assembly	0	0	1	1		Huntington's_disease	0	synapse_assembly	0	0	1	1		Huntington's_disease	3	synapse_assembly	9	0	1	1		Huntington's_disease	0	synapse_assembly	0	0	1	1			Huntington's_disease	1	synapse_assembly	1	0	1	1		Huntington's_disease	0	synapse_assembly	0	0	1	1		Huntington's_disease
Huntington's_disease	0	insulin_receptor_signaling_pathway	0	0	1	1		Huntington's_disease	0	insulin_receptor_signaling_pathway	1	0	1	1		Huntington's_disease	3	insulin_receptor_signaling_pathway	10	2	1	1		Huntington's_disease	0	insulin_receptor_signaling_pathway	0	0	1	1			Huntington's_disease	1	insulin_receptor_signaling_pathway	2	0	1	1		Huntington's_disease	0	insulin_receptor_signaling_pathway	2	0	1	1		Huntington's_disease
Huntington's_disease	0	fibroblast_growth_factor_receptor_signal...	0	0	1	1		Huntington's_disease	0	fibroblast_growth_factor_receptor_signal...	1	0	1	1		Huntington's_disease	3	fibroblast_growth_factor_receptor_signal...	10	2	1	1		Huntington's_disease	0	fibroblast_growth_factor_receptor_signal...	0	0	1	1			Huntington's_disease	1	fibroblast_growth_factor_receptor_signal...	3	0	1	1		Huntington's_disease	0	fibroblast_growth_factor_receptor_signal...	2	0	1	1		Huntington's_disease
Huntington's_disease	0	proteasomal_ubiquitin-independent_protei...	0	0	1	1		Huntington's_disease	0	proteasomal_ubiquitin-independent_protei...	0	0	1	1		Huntington's_disease	3	proteasomal_ubiquitin-independent_protei...	0	0	1	1		Huntington's_disease	0	proteasomal_ubiquitin-independent_protei...	0	0	1	1			Huntington's_disease	1	proteasomal_ubiquitin-independent_protei...	0	0	1	1		Huntington's_disease	0	proteasomal_ubiquitin-independent_protei...	0	0	1	1		Huntington's_disease
Huntington's_disease	0	viral_process	0	0	1	1		Huntington's_disease	0	viral_process	0	0	1	1		Huntington's_disease	3	viral_process	1	0	1	1		Huntington's_disease	0	viral_process	0	0	1	1			Huntington's_disease	1	viral_process	4	0	1	1		Huntington's_disease	0	viral_process	3	0	1	1		Huntington's_disease
Huntington's_disease	0	substantia_nigra_development	0	0	1	1		Huntington's_disease	0	substantia_nigra_development	0	0	1	1		Huntington's_disease	3	substantia_nigra_development	1	0	1	1		Huntington's_disease	0	substantia_nigra_development	0	0	1	1			Huntington's_disease	1	substantia_nigra_development	5	0	1	1		Huntington's_disease	0	substantia_nigra_development	0	0	1	1		Huntington's_disease
Huntington's_disease	0	platelet_activation	0	0	1	1		Huntington's_disease	0	platelet_activation	0	0	1	1		Huntington's_disease	3	platelet_activation	5	0	1	1		Huntington's_disease	0	platelet_activation	0	0	1	1			Huntington's_disease	1	platelet_activation	7	0	1	1		Huntington's_disease	0	platelet_activation	1	0	1	1		Huntington's_disease
Huntington's_disease	0	anaphase-promoting_complex-dependent_pro...	0	0	1	1		Huntington's_disease	0	anaphase-promoting_complex-dependent_pro...	0	0	1	1		Huntington's_disease	3	anaphase-promoting_complex-dependent_pro...	0	0	1	1		Huntington's_disease	0	anaphase-promoting_complex-dependent_pro...	0	0	1	1			Huntington's_disease	1	anaphase-promoting_complex-dependent_pro...	1	0	1	1		Huntington's_disease	0	anaphase-promoting_complex-dependent_pro...	1	0	1	1		Huntington's_disease
Huntington's_disease	0	tumor_necrosis_factor-mediated_signaling...	0	0	1	1		Huntington's_disease	0	tumor_necrosis_factor-mediated_signaling...	0	0	1	1		Huntington's_disease	3	tumor_necrosis_factor-mediated_signaling...	1	0	1	1		Huntington's_disease	0	tumor_necrosis_factor-mediated_signaling...	0	0	1	1			Huntington's_disease	1	tumor_necrosis_factor-mediated_signaling...	0	0	1	1		Huntington's_disease	0	tumor_necrosis_factor-mediated_signaling...	1	0	1	1		Huntington's_disease
Huntington's_disease	0	cell_junction_assembly	0	0	1	1		Huntington's_disease	0	cell_junction_assembly	0	0	1	1		Huntington's_disease	3	cell_junction_assembly	14	0	1	1		Huntington's_disease	0	cell_junction_assembly	0	0	1	1			Huntington's_disease	1	cell_junction_assembly	6	0	1	1		Huntington's_disease	0	cell_junction_assembly	0	0	1	1		Huntington's_disease
Huntington's_disease	0	adherens_junction_organization	0	0	1	1		Huntington's_disease	0	adherens_junction_organization	0	0	1	1		Huntington's_disease	3	adherens_junction_organization	10	0	1	1		Huntington's_disease	0	adherens_junction_organization	0	0	1	1			Huntington's_disease	1	adherens_junction_organization	6	0	1	1		Huntington's_disease	0	adherens_junction_organization	0	0	1	1		Huntington's_disease
Huntington's_disease	0	social_behavior	0	0	1	1		Huntington's_disease	0	social_behavior	0	0	1	1		Huntington's_disease	3	social_behavior	7	0	1	1		Huntington's_disease	0	social_behavior	0	0	1	1			Huntington's_disease	1	social_behavior	1	0	1	1		Huntington's_disease	0	social_behavior	0	0	1	1		Huntington's_disease
Huntington's_disease	0	NIK/NF-kappaB_signaling	0	0	1	1		Huntington's_disease	0	NIK/NF-kappaB_signaling	0	0	1	1		Huntington's_disease	3	NIK/NF-kappaB_signaling	1	0	1	1		Huntington's_disease	0	NIK/NF-kappaB_signaling	0	0	1	1			Huntington's_disease	1	NIK/NF-kappaB_signaling	0	0	1	1		Huntington's_disease	0	NIK/NF-kappaB_signaling	1	0	1	1		Huntington's_disease
Huntington's_disease	0	Fc-epsilon_receptor_signaling_pathway	0	0	1	1		Huntington's_disease	0	Fc-epsilon_receptor_signaling_pathway	1	0	1	1		Huntington's_disease	3	Fc-epsilon_receptor_signaling_pathway	9	2	1	1		Huntington's_disease	0	Fc-epsilon_receptor_signaling_pathway	0	0	1	1			Huntington's_disease	1	Fc-epsilon_receptor_signaling_pathway	3	0	1	1		Huntington's_disease	0	Fc-epsilon_receptor_signaling_pathway	2	0	1	1		Huntington's_disease
Huntington's_disease	0	Fc-gamma_receptor_signaling_pathway_invo...	0	0	1	1		Huntington's_disease	0	Fc-gamma_receptor_signaling_pathway_invo...	0	0	1	1		Huntington's_disease	3	Fc-gamma_receptor_signaling_pathway_invo...	4	0	1	1		Huntington's_disease	0	Fc-gamma_receptor_signaling_pathway_invo...	1	0	1	1			Huntington's_disease	1	Fc-gamma_receptor_signaling_pathway_invo...	4	0	1	1		Huntington's_disease	0	Fc-gamma_receptor_signaling_pathway_invo...	1	0	1	1		Huntington's_disease
Huntington's_disease	0	negative_regulation_of_epidermal_growth_...	0	0	1	1		Huntington's_disease	0	negative_regulation_of_epidermal_growth_...	0	0	1	1		Huntington's_disease	3	negative_regulation_of_epidermal_growth_...	2	0	1	1		Huntington's_disease	0	negative_regulation_of_epidermal_growth_...	0	0	1	1			Huntington's_disease	1	negative_regulation_of_epidermal_growth_...	2	0	1	1		Huntington's_disease	0	negative_regulation_of_epidermal_growth_...	2	0	1	1		Huntington's_disease
Huntington's_disease	0	negative_regulation_of_apoptotic_process	0	0	1	1		Huntington's_disease	0	negative_regulation_of_apoptotic_process	0	0	1	1		Huntington's_disease	3	negative_regulation_of_apoptotic_process	5	0	1	1		Huntington's_disease	0	negative_regulation_of_apoptotic_process	1	0	1	1			Huntington's_disease	1	negative_regulation_of_apoptotic_process	5	0	1	1		Huntington's_disease	0	negative_regulation_of_apoptotic_process	1	0	1	1		Huntington's_disease
Huntington's_disease	0	innate_immune_response	1	0	1	1		Huntington's_disease	0	innate_immune_response	1	0	1	1		Huntington's_disease	3	innate_immune_response	16	2	1	1		Huntington's_disease	0	innate_immune_response	2	0	1	1			Huntington's_disease	1	innate_immune_response	9	1	1	1		Huntington's_disease	0	innate_immune_response	2	0	1	1		Huntington's_disease
Huntington's_disease	0	positive_regulation_of_RNA_polymerase_II...	0	0	1	1		Huntington's_disease	0	positive_regulation_of_RNA_polymerase_II...	0	0	1	1		Huntington's_disease	3	positive_regulation_of_RNA_polymerase_II...	0	0	1	1		Huntington's_disease	0	positive_regulation_of_RNA_polymerase_II...	0	0	1	1			Huntington's_disease	1	positive_regulation_of_RNA_polymerase_II...	0	0	1	1		Huntington's_disease	0	positive_regulation_of_RNA_polymerase_II...	0	0	1	1		Huntington's_disease
Huntington's_disease	0	GMP_metabolic_process	0	0	1	1		Huntington's_disease	0	GMP_metabolic_process	0	0	1	1		Huntington's_disease	3	GMP_metabolic_process	4	0	1	1		Huntington's_disease	0	GMP_metabolic_process	0	0	1	1			Huntington's_disease	1	GMP_metabolic_process	1	0	1	1		Huntington's_disease	0	GMP_metabolic_process	0	0	1	1		Huntington's_disease
Huntington's_disease	0	GDP_metabolic_process	0	0	1	1		Huntington's_disease	0	GDP_metabolic_process	0	0	1	1		Huntington's_disease	3	GDP_metabolic_process	4	0	1	1		Huntington's_disease	0	GDP_metabolic_process	0	0	1	1			Huntington's_disease	1	GDP_metabolic_process	1	0	1	1		Huntington's_disease	0	GDP_metabolic_process	0	0	1	1		Huntington's_disease
Huntington's_disease	0	vascular_endothelial_growth_factor_recep...	0	0	1	1		Huntington's_disease	0	vascular_endothelial_growth_factor_recep...	1	0	1	1		Huntington's_disease	3	vascular_endothelial_growth_factor_recep...	14	2	1	1		Huntington's_disease	0	vascular_endothelial_growth_factor_recep...	0	0	1	1			Huntington's_disease	1	vascular_endothelial_growth_factor_recep...	6	0	1	1		Huntington's_disease	0	vascular_endothelial_growth_factor_recep...	2	0	1	1		Huntington's_disease
Huntington's_disease	0	neurotrophin_TRK_receptor_signaling_path...	0	0	1	1		Huntington's_disease	0	neurotrophin_TRK_receptor_signaling_path...	1	0	1	1		Huntington's_disease	3	neurotrophin_TRK_receptor_signaling_path...	10	2	1	1		Huntington's_disease	0	neurotrophin_TRK_receptor_signaling_path...	0	0	1	1			Huntington's_disease	1	neurotrophin_TRK_receptor_signaling_path...	5	0	1	1		Huntington's_disease	0	neurotrophin_TRK_receptor_signaling_path...	2	0	1	1		Huntington's_disease
Huntington's_disease	0	ephrin_receptor_signaling_pathway	0	0	1	1		Huntington's_disease	0	ephrin_receptor_signaling_pathway	0	0	1	1		Huntington's_disease	3	ephrin_receptor_signaling_pathway	9	2	1	1		Huntington's_disease	0	ephrin_receptor_signaling_pathway	1	0	1	1			Huntington's_disease	1	ephrin_receptor_signaling_pathway	6	0	1	1		Huntington's_disease	0	ephrin_receptor_signaling_pathway	0	0	1	1		Huntington's_disease
Huntington's_disease	0	regulation_of_synaptic_plasticity	0	0	1	1		Huntington's_disease	0	regulation_of_synaptic_plasticity	0	0	1	1		Huntington's_disease	3	regulation_of_synaptic_plasticity	13	2	1	1		Huntington's_disease	0	regulation_of_synaptic_plasticity	1	0	1	1			Huntington's_disease	1	regulation_of_synaptic_plasticity	1	0	1	1		Huntington's_disease	0	regulation_of_synaptic_plasticity	0	0	1	1		Huntington's_disease
Huntington's_disease	0	neuromuscular_process_controlling_balanc...	0	0	1	1		Huntington's_disease	0	neuromuscular_process_controlling_balanc...	0	0	1	1		Huntington's_disease	3	neuromuscular_process_controlling_balanc...	5	0	1	1		Huntington's_disease	0	neuromuscular_process_controlling_balanc...	0	0	1	1			Huntington's_disease	1	neuromuscular_process_controlling_balanc...	0	0	1	1		Huntington's_disease	0	neuromuscular_process_controlling_balanc...	0	0	1	1		Huntington's_disease
Huntington's_disease	0	actin_filament_bundle_assembly	0	0	1	1		Huntington's_disease	0	actin_filament_bundle_assembly	0	0	1	1		Huntington's_disease	3	actin_filament_bundle_assembly	7	0	1	1		Huntington's_disease	0	actin_filament_bundle_assembly	1	0	1	1			Huntington's_disease	1	actin_filament_bundle_assembly	3	0	1	1		Huntington's_disease	0	actin_filament_bundle_assembly	0	0	1	1		Huntington's_disease
Huntington's_disease	0	'de_novo'_posttranslational_protein_fold...	0	0	1	1		Huntington's_disease	0	'de_novo'_posttranslational_protein_fold...	0	0	1	1		Huntington's_disease	3	'de_novo'_posttranslational_protein_fold...	1	0	1	1		Huntington's_disease	0	'de_novo'_posttranslational_protein_fold...	0	0	1	1			Huntington's_disease	1	'de_novo'_posttranslational_protein_fold...	2	0	1	1		Huntington's_disease	0	'de_novo'_posttranslational_protein_fold...	1	0	1	1		Huntington's_disease
Huntington's_disease	0	negative_regulation_of_ubiquitin-protein...	0	0	1	1		Huntington's_disease	0	negative_regulation_of_ubiquitin-protein...	0	0	1	1		Huntington's_disease	3	negative_regulation_of_ubiquitin-protein...	0	0	1	1		Huntington's_disease	0	negative_regulation_of_ubiquitin-protein...	0	0	1	1			Huntington's_disease	1	negative_regulation_of_ubiquitin-protein...	0	0	1	1		Huntington's_disease	0	negative_regulation_of_ubiquitin-protein...	1	0	1	1		Huntington's_disease
Huntington's_disease	0	positive_regulation_of_ubiquitin-protein...	0	0	1	1		Huntington's_disease	0	positive_regulation_of_ubiquitin-protein...	0	0	1	1		Huntington's_disease	3	positive_regulation_of_ubiquitin-protein...	0	0	1	1		Huntington's_disease	0	positive_regulation_of_ubiquitin-protein...	0	0	1	1			Huntington's_disease	1	positive_regulation_of_ubiquitin-protein...	0	0	1	1		Huntington's_disease	0	positive_regulation_of_ubiquitin-protein...	1	0	1	1		Huntington's_disease
Huntington's_disease	0	actin_filament_capping	0	0	1	1		Huntington's_disease	0	actin_filament_capping	1	0	1	1		Huntington's_disease	3	actin_filament_capping	6	0	1	1		Huntington's_disease	0	actin_filament_capping	1	0	1	1			Huntington's_disease	1	actin_filament_capping	0	0	1	1		Huntington's_disease	0	actin_filament_capping	0	0	1	1		Huntington's_disease
Huntington's_disease	0	vocalization_behavior	0	0	1	1		Huntington's_disease	0	vocalization_behavior	0	0	1	1		Huntington's_disease	3	vocalization_behavior	6	0	1	1		Huntington's_disease	0	vocalization_behavior	0	0	1	1			Huntington's_disease	1	vocalization_behavior	0	0	1	1		Huntington's_disease	0	vocalization_behavior	0	0	1	1		Huntington's_disease
Huntington's_disease	0	negative_regulation_of_canonical_Wnt_sig...	0	0	1	1		Huntington's_disease	0	negative_regulation_of_canonical_Wnt_sig...	0	0	1	1		Huntington's_disease	3	negative_regulation_of_canonical_Wnt_sig...	3	0	1	1		Huntington's_disease	0	negative_regulation_of_canonical_Wnt_sig...	0	0	1	1			Huntington's_disease	1	negative_regulation_of_canonical_Wnt_sig...	1	0	1	1		Huntington's_disease	0	negative_regulation_of_canonical_Wnt_sig...	1	0	1	1		Huntington's_disease
Huntington's_disease	0	positive_regulation_of_canonical_Wnt_sig...	0	0	1	1		Huntington's_disease	0	positive_regulation_of_canonical_Wnt_sig...	0	0	1	1		Huntington's_disease	3	positive_regulation_of_canonical_Wnt_sig...	2	0	1	1		Huntington's_disease	0	positive_regulation_of_canonical_Wnt_sig...	0	0	1	1			Huntington's_disease	1	positive_regulation_of_canonical_Wnt_sig...	0	0	1	1		Huntington's_disease	0	positive_regulation_of_canonical_Wnt_sig...	1	0	1	1		Huntington's_disease
Huntington's_disease	0	intrinsic_apoptotic_signaling_pathway	0	0	1	1		Huntington's_disease	0	intrinsic_apoptotic_signaling_pathway	0	0	1	1		Huntington's_disease	3	intrinsic_apoptotic_signaling_pathway	3	0	1	1		Huntington's_disease	0	intrinsic_apoptotic_signaling_pathway	0	0	1	1			Huntington's_disease	1	intrinsic_apoptotic_signaling_pathway	2	0	1	1		Huntington's_disease	0	intrinsic_apoptotic_signaling_pathway	0	0	1	1		Huntington's_disease
Huntington's_disease	0	toxin_transport	0	0	1	1		Huntington's_disease	0	toxin_transport	0	0	1	1		Huntington's_disease	3	toxin_transport	0	0	1	1		Huntington's_disease	0	toxin_transport	0	0	1	1			Huntington's_disease	1	toxin_transport	1	0	1	1		Huntington's_disease	0	toxin_transport	0	0	1	1		Huntington's_disease
Huntington's_disease	0	positive_regulation_of_excitatory_postsy...	0	0	1	1		Huntington's_disease	0	positive_regulation_of_excitatory_postsy...	0	0	1	1		Huntington's_disease	3	positive_regulation_of_excitatory_postsy...	8	0	1	1		Huntington's_disease	0	positive_regulation_of_excitatory_postsy...	0	0	1	1			Huntington's_disease	1	positive_regulation_of_excitatory_postsy...	0	0	1	1		Huntington's_disease	0	positive_regulation_of_excitatory_postsy...	0	0	1	1		Huntington's_disease
Parkinson's_disease	0	G2/M_transition_of_mitotic_cell_cycle	0	0	1	1		Parkinson's_disease	0	G2/M_transition_of_mitotic_cell_cycle	0	0	1	1		Parkinson's_disease	8	G2/M_transition_of_mitotic_cell_cycle	0	0	1	1		Parkinson's_disease	0	G2/M_transition_of_mitotic_cell_cycle	0	0	1	1			Parkinson's_disease	3	G2/M_transition_of_mitotic_cell_cycle	2	0	1	1		Parkinson's_disease	1	G2/M_transition_of_mitotic_cell_cycle	1	0	1	1		Parkinson's_disease
Parkinson's_disease	0	nuclear-transcribed_mRNA_catabolic_proce...	0	0	1	1		Parkinson's_disease	0	nuclear-transcribed_mRNA_catabolic_proce...	0	0	1	1		Parkinson's_disease	8	nuclear-transcribed_mRNA_catabolic_proce...	0	0	1	1		Parkinson's_disease	0	nuclear-transcribed_mRNA_catabolic_proce...	0	0	1	1			Parkinson's_disease	3	nuclear-transcribed_mRNA_catabolic_proce...	1	0	1	1		Parkinson's_disease	1	nuclear-transcribed_mRNA_catabolic_proce...	0	0	1	1		Parkinson's_disease
Parkinson's_disease	0	activation_of_MAPKK_activity	0	0	1	1		Parkinson's_disease	0	activation_of_MAPKK_activity	1	0	1	1		Parkinson's_disease	8	activation_of_MAPKK_activity	10	3	0.00420209	1		Parkinson's_disease	0	activation_of_MAPKK_activity	0	0	1	1			Parkinson's_disease	3	activation_of_MAPKK_activity	3	0	1	1		Parkinson's_disease	1	activation_of_MAPKK_activity	2	0	1	1		Parkinson's_disease
Parkinson's_disease	0	protein_polyubiquitination	0	0	1	1		Parkinson's_disease	0	protein_polyubiquitination	0	0	1	1		Parkinson's_disease	8	protein_polyubiquitination	0	0	1	1		Parkinson's_disease	0	protein_polyubiquitination	0	0	1	1			Parkinson's_disease	3	protein_polyubiquitination	0	0	1	1		Parkinson's_disease	1	protein_polyubiquitination	1	0	1	1		Parkinson's_disease
Parkinson's_disease	0	stimulatory_C-type_lectin_receptor_signa...	0	0	1	1		Parkinson's_disease	0	stimulatory_C-type_lectin_receptor_signa...	0	0	1	1		Parkinson's_disease	8	stimulatory_C-type_lectin_receptor_signa...	1	0	1	1		Parkinson's_disease	0	stimulatory_C-type_lectin_receptor_signa...	0	0	1	1			Parkinson's_disease	3	stimulatory_C-type_lectin_receptor_signa...	2	0	1	1		Parkinson's_disease	1	stimulatory_C-type_lectin_receptor_signa...	1	0	1	1		Parkinson's_disease
Parkinson's_disease	0	antigen_processing_and_presentation_of_e...	0	0	1	1		Parkinson's_disease	0	antigen_processing_and_presentation_of_e...	0	0	1	1		Parkinson's_disease	8	antigen_processing_and_presentation_of_e...	0	0	1	1		Parkinson's_disease	0	antigen_processing_and_presentation_of_e...	0	0	1	1			Parkinson's_disease	3	antigen_processing_and_presentation_of_e...	0	0	1	1		Parkinson's_disease	1	antigen_processing_and_presentation_of_e...	1	0	1	1		Parkinson's_disease
Parkinson's_disease	0	translational_initiation	0	0	1	1		Parkinson's_disease	0	translational_initiation	0	0	1	1		Parkinson's_disease	8	translational_initiation	1	0	1	1		Parkinson's_disease	0	translational_initiation	1	0	1	1			Parkinson's_disease	3	translational_initiation	2	0	1	1		Parkinson's_disease	1	translational_initiation	0	0	1	1		Parkinson's_disease
Parkinson's_disease	0	regulation_of_cellular_amino_acid_metabo...	0	0	1	1		Parkinson's_disease	0	regulation_of_cellular_amino_acid_metabo...	0	0	1	1		Parkinson's_disease	8	regulation_of_cellular_amino_acid_metabo...	0	0	1	1		Parkinson's_disease	0	regulation_of_cellular_amino_acid_metabo...	0	0	1	1			Parkinson's_disease	3	regulation_of_cellular_amino_acid_metabo...	0	0	1	1		Parkinson's_disease	1	regulation_of_cellular_amino_acid_metabo...	0	0	1	1		Parkinson's_disease
Parkinson's_disease	0	SRP-dependent_cotranslational_protein_ta...	0	0	1	1		Parkinson's_disease	0	SRP-dependent_cotranslational_protein_ta...	0	0	1	1		Parkinson's_disease	8	SRP-dependent_cotranslational_protein_ta...	0	0	1	1		Parkinson's_disease	0	SRP-dependent_cotranslational_protein_ta...	0	0	1	1			Parkinson's_disease	3	SRP-dependent_cotranslational_protein_ta...	0	0	1	1		Parkinson's_disease	1	SRP-dependent_cotranslational_protein_ta...	0	0	1	1		Parkinson's_disease
Parkinson's_disease	0	DNA_damage_response,_signal_transduction...	0	0	1	1		Parkinson's_disease	0	DNA_damage_response,_signal_transduction...	0	0	1	1		Parkinson's_disease	8	DNA_damage_response,_signal_transduction...	0	0	1	1		Parkinson's_disease	0	DNA_damage_response,_signal_transduction...	0	0	1	1			Parkinson's_disease	3	DNA_damage_response,_signal_transduction...	0	0	1	1		Parkinson's_disease	1	DNA_damage_response,_signal_transduction...	1	0	1	1		Parkinson's_disease
Parkinson's_disease	0	epidermal_growth_factor_receptor_signali...	1	0	1	1		Parkinson's_disease	0	epidermal_growth_factor_receptor_signali...	1	0	1	1		Parkinson's_disease	8	epidermal_growth_factor_receptor_signali...	12	3	0.00730474	1		Parkinson's_disease	0	epidermal_growth_factor_receptor_signali...	0	0	1	1			Parkinson's_disease	3	epidermal_growth_factor_receptor_signali...	4	0	1	1		Parkinson's_disease	1	epidermal_growth_factor_receptor_signali...	2	0	1	1		Parkinson's_disease
Parkinson's_disease	0	small_GTPase_mediated_signal_transductio...	0	0	1	1		Parkinson's_disease	0	small_GTPase_mediated_signal_transductio...	1	0	1	1		Parkinson's_disease	8	small_GTPase_mediated_signal_transductio...	19	4	0.00298721	1		Parkinson's_disease	0	small_GTPase_mediated_signal_transductio...	1	0	1	1			Parkinson's_disease	3	small_GTPase_mediated_signal_transductio...	11	2	1	1		Parkinson's_disease	1	small_GTPase_mediated_signal_transductio...	2	0	1	1		Parkinson's_disease
Parkinson's_disease	0	Ras_protein_signal_transduction	0	0	1	1		Parkinson's_disease	0	Ras_protein_signal_transduction	1	0	1	1		Parkinson's_disease	8	Ras_protein_signal_transduction	12	3	0.00730474	1		Parkinson's_disease	0	Ras_protein_signal_transduction	0	0	1	1			Parkinson's_disease	3	Ras_protein_signal_transduction	6	1	1	1		Parkinson's_disease	1	Ras_protein_signal_transduction	2	0	1	1		Parkinson's_disease
Parkinson's_disease	0	synaptic_transmission	0	0	1	1		Parkinson's_disease	0	synaptic_transmission	0	0	1	1		Parkinson's_disease	8	synaptic_transmission	27	5	0.00121402	0.758971		Parkinson's_disease	0	synaptic_transmission	1	0	1	1			Parkinson's_disease	3	synaptic_transmission	4	0	1	1		Parkinson's_disease	1	synaptic_transmission	1	1	1	1		Parkinson's_disease
Parkinson's_disease	0	neurotransmitter_secretion	0	0	1	1		Parkinson's_disease	0	neurotransmitter_secretion	0	0	1	1		Parkinson's_disease	8	neurotransmitter_secretion	6	0	1	1		Parkinson's_disease	0	neurotransmitter_secretion	0	0	1	1			Parkinson's_disease	3	neurotransmitter_secretion	1	0	1	1		Parkinson's_disease	1	neurotransmitter_secretion	1	1	1	1		Parkinson's_disease
Parkinson's_disease	0	axon_guidance	0	0	1	1		Parkinson's_disease	0	axon_guidance	1	0	1	1		Parkinson's_disease	8	axon_guidance	19	4	0.00298721	1		Parkinson's_disease	0	axon_guidance	1	0	1	1			Parkinson's_disease	3	axon_guidance	9	1	1	1		Parkinson's_disease	1	axon_guidance	3	1	1	1		Parkinson's_disease
Parkinson's_disease	0	synapse_assembly	0	0	1	1		Parkinson's_disease	0	synapse_assembly	0	0	1	1		Parkinson's_disease	8	synapse_assembly	9	1	1	1		Parkinson's_disease	0	synapse_assembly	0	0	1	1			Parkinson's_disease	3	synapse_assembly	1	0	1	1		Parkinson's_disease	1	synapse_assembly	0	0	1	1		Parkinson's_disease
Parkinson's_disease	0	insulin_receptor_signaling_pathway	0	0	1	1		Parkinson's_disease	0	insulin_receptor_signaling_pathway	1	0	1	1		Parkinson's_disease	8	insulin_receptor_signaling_pathway	10	3	0.00420209	1		Parkinson's_disease	0	insulin_receptor_signaling_pathway	0	0	1	1			Parkinson's_disease	3	insulin_receptor_signaling_pathway	2	0	1	1		Parkinson's_disease	1	insulin_receptor_signaling_pathway	2	0	1	1		Parkinson's_disease
Parkinson's_disease	0	fibroblast_growth_factor_receptor_signal...	0	0	1	1		Parkinson's_disease	0	fibroblast_growth_factor_receptor_signal...	1	0	1	1		Parkinson's_disease	8	fibroblast_growth_factor_receptor_signal...	10	3	0.00420209	1		Parkinson's_disease	0	fibroblast_growth_factor_receptor_signal...	0	0	1	1			Parkinson's_disease	3	fibroblast_growth_factor_receptor_signal...	3	0	1	1		Parkinson's_disease	1	fibroblast_growth_factor_receptor_signal...	2	0	1	1		Parkinson's_disease
Parkinson's_disease	0	proteasomal_ubiquitin-independent_protei...	0	0	1	1		Parkinson's_disease	0	proteasomal_ubiquitin-independent_protei...	0	0	1	1		Parkinson's_disease	8	proteasomal_ubiquitin-independent_protei...	0	0	1	1		Parkinson's_disease	0	proteasomal_ubiquitin-independent_protei...	0	0	1	1			Parkinson's_disease	3	proteasomal_ubiquitin-independent_protei...	0	0	1	1		Parkinson's_disease	1	proteasomal_ubiquitin-independent_protei...	0	0	1	1		Parkinson's_disease
Parkinson's_disease	0	viral_process	0	0	1	1		Parkinson's_disease	0	viral_process	0	0	1	1		Parkinson's_disease	8	viral_process	1	0	1	1		Parkinson's_disease	0	viral_process	0	0	1	1			Parkinson's_disease	3	viral_process	4	0	1	1		Parkinson's_disease	1	viral_process	3	1	1	1		Parkinson's_disease
Parkinson's_disease	0	substantia_nigra_development	0	0	1	1		Parkinson's_disease	0	substantia_nigra_development	0	0	1	1		Parkinson's_disease	8	substantia_nigra_development	1	1	1	1		Parkinson's_disease	0	substantia_nigra_development	0	0	1	1			Parkinson's_disease	3	substantia_nigra_development	5	1	1	1		Parkinson's_disease	1	substantia_nigra_development	0	0	1	1		Parkinson's_disease
Parkinson's_disease	0	platelet_activation	0	0	1	1		Parkinson's_disease	0	platelet_activation	0	0	1	1		Parkinson's_disease	8	platelet_activation	5	1	1	1		Parkinson's_disease	0	platelet_activation	0	0	1	1			Parkinson's_disease	3	platelet_activation	7	1	1	1		Parkinson's_disease	1	platelet_activation	1	0	1	1		Parkinson's_disease
Parkinson's_disease	0	anaphase-promoting_complex-dependent_pro...	0	0	1	1		Parkinson's_disease	0	anaphase-promoting_complex-dependent_pro...	0	0	1	1		Parkinson's_disease	8	anaphase-promoting_complex-dependent_pro...	0	0	1	1		Parkinson's_disease	0	anaphase-promoting_complex-dependent_pro...	0	0	1	1			Parkinson's_disease	3	anaphase-promoting_complex-dependent_pro...	1	0	1	1		Parkinson's_disease	1	anaphase-promoting_complex-dependent_pro...	1	0	1	1		Parkinson's_disease
Parkinson's_disease	0	tumor_necrosis_factor-mediated_signaling...	0	0	1	1		Parkinson's_disease	0	tumor_necrosis_factor-mediated_signaling...	0	0	1	1		Parkinson's_disease	8	tumor_necrosis_factor-mediated_signaling...	1	0	1	1		Parkinson's_disease	0	tumor_necrosis_factor-mediated_signaling...	0	0	1	1			Parkinson's_disease	3	tumor_necrosis_factor-mediated_signaling...	0	0	1	1		Parkinson's_disease	1	tumor_necrosis_factor-mediated_signaling...	1	0	1	1		Parkinson's_disease
Parkinson's_disease	0	cell_junction_assembly	0	0	1	1		Parkinson's_disease	0	cell_junction_assembly	0	0	1	1		Parkinson's_disease	8	cell_junction_assembly	14	2	1	1		Parkinson's_disease	0	cell_junction_assembly	0	0	1	1			Parkinson's_disease	3	cell_junction_assembly	6	2	1	1		Parkinson's_disease	1	cell_junction_assembly	0	0	1	1		Parkinson's_disease
Parkinson's_disease	0	adherens_junction_organization	0	0	1	1		Parkinson's_disease	0	adherens_junction_organization	0	0	1	1		Parkinson's_disease	8	adherens_junction_organization	10	2	1	1		Parkinson's_disease	0	adherens_junction_organization	0	0	1	1			Parkinson's_disease	3	adherens_junction_organization	6	2	1	1		Parkinson's_disease	1	adherens_junction_organization	0	0	1	1		Parkinson's_disease
Parkinson's_disease	0	social_behavior	0	0	1	1		Parkinson's_disease	0	social_behavior	0	0	1	1		Parkinson's_disease	8	social_behavior	7	1	1	1		Parkinson's_disease	0	social_behavior	0	0	1	1			Parkinson's_disease	3	social_behavior	1	0	1	1		Parkinson's_disease	1	social_behavior	0	0	1	1		Parkinson's_disease
Parkinson's_disease	0	NIK/NF-kappaB_signaling	0	0	1	1		Parkinson's_disease	0	NIK/NF-kappaB_signaling	0	0	1	1		Parkinson's_disease	8	NIK/NF-kappaB_signaling	1	0	1	1		Parkinson's_disease	0	NIK/NF-kappaB_signaling	0	0	1	1			Parkinson's_disease	3	NIK/NF-kappaB_signaling	0	0	1	1		Parkinson's_disease	1	NIK/NF-kappaB_signaling	1	0	1	1		Parkinson's_disease
Parkinson's_disease	0	Fc-epsilon_receptor_signaling_pathway	0	0	1	1		Parkinson's_disease	0	Fc-epsilon_receptor_signaling_pathway	1	0	1	1		Parkinson's_disease	8	Fc-epsilon_receptor_signaling_pathway	9	3	0.00302011	1		Parkinson's_disease	0	Fc-epsilon_receptor_signaling_pathway	0	0	1	1			Parkinson's_disease	3	Fc-epsilon_receptor_signaling_pathway	3	0	1	1		Parkinson's_disease	1	Fc-epsilon_receptor_signaling_pathway	2	0	1	1		Parkinson's_disease
Parkinson's_disease	0	Fc-gamma_receptor_signaling_pathway_invo...	0	0	1	1		Parkinson's_disease	0	Fc-gamma_receptor_signaling_pathway_invo...	0	0	1	1		Parkinson's_disease	8	Fc-gamma_receptor_signaling_pathway_invo...	4	1	1	1		Parkinson's_disease	0	Fc-gamma_receptor_signaling_pathway_invo...	1	0	1	1			Parkinson's_disease	3	Fc-gamma_receptor_signaling_pathway_invo...	4	1	1	1		Parkinson's_disease	1	Fc-gamma_receptor_signaling_pathway_invo...	1	0	1	1		Parkinson's_disease
Parkinson's_disease	0	negative_regulation_of_epidermal_growth_...	0	0	1	1		Parkinson's_disease	0	negative_regulation_of_epidermal_growth_...	0	0	1	1		Parkinson's_disease	8	negative_regulation_of_epidermal_growth_...	2	0	1	1		Parkinson's_disease	0	negative_regulation_of_epidermal_growth_...	0	0	1	1			Parkinson's_disease	3	negative_regulation_of_epidermal_growth_...	2	0	1	1		Parkinson's_disease	1	negative_regulation_of_epidermal_growth_...	2	0	1	1		Parkinson's_disease
Parkinson's_disease	0	negative_regulation_of_apoptotic_process	0	0	1	1		Parkinson's_disease	0	negative_regulation_of_apoptotic_process	0	0	1	1		Parkinson's_disease	8	negative_regulation_of_apoptotic_process	5	0	1	1		Parkinson's_disease	0	negative_regulation_of_apoptotic_process	1	0	1	1			Parkinson's_disease	3	negative_regulation_of_apoptotic_process	5	1	1	1		Parkinson's_disease	1	negative_regulation_of_apoptotic_process	1	0	1	1		Parkinson's_disease
Parkinson's_disease	0	innate_immune_response	1	0	1	1		Parkinson's_disease	0	innate_immune_response	1	0	1	1		Parkinson's_disease	8	innate_immune_response	16	5	7.9e-05	0.0884117		Parkinson's_disease	0	innate_immune_response	2	0	1	1			Parkinson's_disease	3	innate_immune_response	9	1	1	1		Parkinson's_disease	1	innate_immune_response	2	0	1	1		Parkinson's_disease
Parkinson's_disease	0	positive_regulation_of_RNA_polymerase_II...	0	0	1	1		Parkinson's_disease	0	positive_regulation_of_RNA_polymerase_II...	0	0	1	1		Parkinson's_disease	8	positive_regulation_of_RNA_polymerase_II...	0	0	1	1		Parkinson's_disease	0	positive_regulation_of_RNA_polymerase_II...	0	0	1	1			Parkinson's_disease	3	positive_regulation_of_RNA_polymerase_II...	0	0	1	1		Parkinson's_disease	1	positive_regulation_of_RNA_polymerase_II...	0	0	1	1		Parkinson's_disease
Parkinson's_disease	0	GMP_metabolic_process	0	0	1	1		Parkinson's_disease	0	GMP_metabolic_process	0	0	1	1		Parkinson's_disease	8	GMP_metabolic_process	4	2	1	1		Parkinson's_disease	0	GMP_metabolic_process	0	0	1	1			Parkinson's_disease	3	GMP_metabolic_process	1	0	1	1		Parkinson's_disease	1	GMP_metabolic_process	0	0	1	1		Parkinson's_disease
Parkinson's_disease	0	GDP_metabolic_process	0	0	1	1		Parkinson's_disease	0	GDP_metabolic_process	0	0	1	1		Parkinson's_disease	8	GDP_metabolic_process	4	2	1	1		Parkinson's_disease	0	GDP_metabolic_process	0	0	1	1			Parkinson's_disease	3	GDP_metabolic_process	1	0	1	1		Parkinson's_disease	1	GDP_metabolic_process	0	0	1	1		Parkinson's_disease
Parkinson's_disease	0	vascular_endothelial_growth_factor_recep...	0	0	1	1		Parkinson's_disease	0	vascular_endothelial_growth_factor_recep...	1	0	1	1		Parkinson's_disease	8	vascular_endothelial_growth_factor_recep...	14	4	0.000860567	0.565292		Parkinson's_disease	0	vascular_endothelial_growth_factor_recep...	0	0	1	1			Parkinson's_disease	3	vascular_endothelial_growth_factor_recep...	6	1	1	1		Parkinson's_disease	1	vascular_endothelial_growth_factor_recep...	2	0	1	1		Parkinson's_disease
Parkinson's_disease	0	neurotrophin_TRK_receptor_signaling_path...	0	0	1	1		Parkinson's_disease	0	neurotrophin_TRK_receptor_signaling_path...	1	0	1	1		Parkinson's_disease	8	neurotrophin_TRK_receptor_signaling_path...	10	3	0.00420209	1		Parkinson's_disease	0	neurotrophin_TRK_receptor_signaling_path...	0	0	1	1			Parkinson's_disease	3	neurotrophin_TRK_receptor_signaling_path...	5	1	1	1		Parkinson's_disease	1	neurotrophin_TRK_receptor_signaling_path...	2	0	1	1		Parkinson's_disease
Parkinson's_disease	0	ephrin_receptor_signaling_pathway	0	0	1	1		Parkinson's_disease	0	ephrin_receptor_signaling_pathway	0	0	1	1		Parkinson's_disease	8	ephrin_receptor_signaling_pathway	9	2	1	1		Parkinson's_disease	0	ephrin_receptor_signaling_pathway	1	0	1	1			Parkinson's_disease	3	ephrin_receptor_signaling_pathway	6	1	1	1		Parkinson's_disease	1	ephrin_receptor_signaling_pathway	0	0	1	1		Parkinson's_disease
Parkinson's_disease	0	regulation_of_synaptic_plasticity	0	0	1	1		Parkinson's_disease	0	regulation_of_synaptic_plasticity	0	0	1	1		Parkinson's_disease	8	regulation_of_synaptic_plasticity	13	3	0.00924494	1		Parkinson's_disease	0	regulation_of_synaptic_plasticity	1	0	1	1			Parkinson's_disease	3	regulation_of_synaptic_plasticity	1	0	1	1		Parkinson's_disease	1	regulation_of_synaptic_plasticity	0	0	1	1		Parkinson's_disease
Parkinson's_disease	0	neuromuscular_process_controlling_balanc...	0	0	1	1		Parkinson's_disease	0	neuromuscular_process_controlling_balanc...	0	0	1	1		Parkinson's_disease	8	neuromuscular_process_controlling_balanc...	5	1	1	1		Parkinson's_disease	0	neuromuscular_process_controlling_balanc...	0	0	1	1			Parkinson's_disease	3	neuromuscular_process_controlling_balanc...	0	0	1	1		Parkinson's_disease	1	neuromuscular_process_controlling_balanc...	0	0	1	1		Parkinson's_disease
Parkinson's_disease	0	actin_filament_bundle_assembly	0	0	1	1		Parkinson's_disease	0	actin_filament_bundle_assembly	0	0	1	1		Parkinson's_disease	8	actin_filament_bundle_assembly	7	0	1	1		Parkinson's_disease	0	actin_filament_bundle_assembly	1	0	1	1			Parkinson's_disease	3	actin_filament_bundle_assembly	3	0	1	1		Parkinson's_disease	1	actin_filament_bundle_assembly	0	0	1	1		Parkinson's_disease
Parkinson's_disease	0	'de_novo'_posttranslational_protein_fold...	0	0	1	1		Parkinson's_disease	0	'de_novo'_posttranslational_protein_fold...	0	0	1	1		Parkinson's_disease	8	'de_novo'_posttranslational_protein_fold...	1	1	1	1		Parkinson's_disease	0	'de_novo'_posttranslational_protein_fold...	0	0	1	1			Parkinson's_disease	3	'de_novo'_posttranslational_protein_fold...	2	1	1	1		Parkinson's_disease	1	'de_novo'_posttranslational_protein_fold...	1	1	1	1		Parkinson's_disease
Parkinson's_disease	0	negative_regulation_of_ubiquitin-protein...	0	0	1	1		Parkinson's_disease	0	negative_regulation_of_ubiquitin-protein...	0	0	1	1		Parkinson's_disease	8	negative_regulation_of_ubiquitin-protein...	0	0	1	1		Parkinson's_disease	0	negative_regulation_of_ubiquitin-protein...	0	0	1	1			Parkinson's_disease	3	negative_regulation_of_ubiquitin-protein...	0	0	1	1		Parkinson's_disease	1	negative_regulation_of_ubiquitin-protein...	1	0	1	1		Parkinson's_disease
Parkinson's_disease	0	positive_regulation_of_ubiquitin-protein...	0	0	1	1		Parkinson's_disease	0	positive_regulation_of_ubiquitin-protein...	0	0	1	1		Parkinson's_disease	8	positive_regulation_of_ubiquitin-protein...	0	0	1	1		Parkinson's_disease	0	positive_regulation_of_ubiquitin-protein...	0	0	1	1			Parkinson's_disease	3	positive_regulation_of_ubiquitin-protein...	0	0	1	1		Parkinson's_disease	1	positive_regulation_of_ubiquitin-protein...	1	0	1	1		Parkinson's_disease
Parkinson's_disease	0	actin_filament_capping	0	0	1	1		Parkinson's_disease	0	actin_filament_capping	1	0	1	1		Parkinson's_disease	8	actin_filament_capping	6	0	1	1		Parkinson's_disease	0	actin_filament_capping	1	0	1	1			Parkinson's_disease	3	actin_filament_capping	0	0	1	1		Parkinson's_disease	1	actin_filament_capping	0	0	1	1		Parkinson's_disease
Parkinson's_disease	0	vocalization_behavior	0	0	1	1		Parkinson's_disease	0	vocalization_behavior	0	0	1	1		Parkinson's_disease	8	vocalization_behavior	6	1	1	1		Parkinson's_disease	0	vocalization_behavior	0	0	1	1			Parkinson's_disease	3	vocalization_behavior	0	0	1	1		Parkinson's_disease	1	vocalization_behavior	0	0	1	1		Parkinson's_disease
Parkinson's_disease	0	negative_regulation_of_canonical_Wnt_sig...	0	0	1	1		Parkinson's_disease	0	negative_regulation_of_canonical_Wnt_sig...	0	0	1	1		Parkinson's_disease	8	negative_regulation_of_canonical_Wnt_sig...	3	1	1	1		Parkinson's_disease	0	negative_regulation_of_canonical_Wnt_sig...	0	0	1	1			Parkinson's_disease	3	negative_regulation_of_canonical_Wnt_sig...	1	0	1	1		Parkinson's_disease	1	negative_regulation_of_canonical_Wnt_sig...	1	0	1	1		Parkinson's_disease
Parkinson's_disease	0	positive_regulation_of_canonical_Wnt_sig...	0	0	1	1		Parkinson's_disease	0	positive_regulation_of_canonical_Wnt_sig...	0	0	1	1		Parkinson's_disease	8	positive_regulation_of_canonical_Wnt_sig...	2	0	1	1		Parkinson's_disease	0	positive_regulation_of_canonical_Wnt_sig...	0	0	1	1			Parkinson's_disease	3	positive_regulation_of_canonical_Wnt_sig...	0	0	1	1		Parkinson's_disease	1	positive_regulation_of_canonical_Wnt_sig...	1	0	1	1		Parkinson's_disease
Parkinson's_disease	0	intrinsic_apoptotic_signaling_pathway	0	0	1	1		Parkinson's_disease	0	intrinsic_apoptotic_signaling_pathway	0	0	1	1		Parkinson's_disease	8	intrinsic_apoptotic_signaling_pathway	3	1	1	1		Parkinson's_disease	0	intrinsic_apoptotic_signaling_pathway	0	0	1	1			Parkinson's_disease	3	intrinsic_apoptotic_signaling_pathway	2	0	1	1		Parkinson's_disease	1	intrinsic_apoptotic_signaling_pathway	0	0	1	1		Parkinson's_disease
Parkinson's_disease	0	toxin_transport	0	0	1	1		Parkinson's_disease	0	toxin_transport	0	0	1	1		Parkinson's_disease	8	toxin_transport	0	0	1	1		Parkinson's_disease	0	toxin_transport	0	0	1	1			Parkinson's_disease	3	toxin_transport	1	0	1	1		Parkinson's_disease	1	toxin_transport	0	0	1	1		Parkinson's_disease
Parkinson's_disease	0	positive_regulation_of_excitatory_postsy...	0	0	1	1		Parkinson's_disease	0	positive_regulation_of_excitatory_postsy...	0	0	1	1		Parkinson's_disease	8	positive_regulation_of_excitatory_postsy...	8	1	1	1		Parkinson's_disease	0	positive_regulation_of_excitatory_postsy...	0	0	1	1			Parkinson's_disease	3	positive_regulation_of_excitatory_postsy...	0	0	1	1		Parkinson's_disease	1	positive_regulation_of_excitatory_postsy...	0	0	1	1		Parkinson's_disease
epilepsy_syndrome	0	G2/M_transition_of_mitotic_cell_cycle	0	0	1	1		epilepsy_syndrome	1	G2/M_transition_of_mitotic_cell_cycle	0	0	1	1		epilepsy_syndrome	9	G2/M_transition_of_mitotic_cell_cycle	0	0	1	1		epilepsy_syndrome	0	G2/M_transition_of_mitotic_cell_cycle	0	0	1	1			epilepsy_syndrome	4	G2/M_transition_of_mitotic_cell_cycle	2	0	1	1		epilepsy_syndrome	1	G2/M_transition_of_mitotic_cell_cycle	1	1	1	1		epilepsy_syndrome
epilepsy_syndrome	0	nuclear-transcribed_mRNA_catabolic_proce...	0	0	1	1		epilepsy_syndrome	1	nuclear-transcribed_mRNA_catabolic_proce...	0	0	1	1		epilepsy_syndrome	9	nuclear-transcribed_mRNA_catabolic_proce...	0	0	1	1		epilepsy_syndrome	0	nuclear-transcribed_mRNA_catabolic_proce...	0	0	1	1			epilepsy_syndrome	4	nuclear-transcribed_mRNA_catabolic_proce...	1	0	1	1		epilepsy_syndrome	1	nuclear-transcribed_mRNA_catabolic_proce...	0	0	1	1		epilepsy_syndrome
epilepsy_syndrome	0	activation_of_MAPKK_activity	0	0	1	1		epilepsy_syndrome	1	activation_of_MAPKK_activity	1	1	1	1		epilepsy_syndrome	9	activation_of_MAPKK_activity	10	3	0.00607453	1		epilepsy_syndrome	0	activation_of_MAPKK_activity	0	0	1	1			epilepsy_syndrome	4	activation_of_MAPKK_activity	3	0	1	1		epilepsy_syndrome	1	activation_of_MAPKK_activity	2	1	1	1		epilepsy_syndrome
epilepsy_syndrome	0	protein_polyubiquitination	0	0	1	1		epilepsy_syndrome	1	protein_polyubiquitination	0	0	1	1		epilepsy_syndrome	9	protein_polyubiquitination	0	0	1	1		epilepsy_syndrome	0	protein_polyubiquitination	0	0	1	1			epilepsy_syndrome	4	protein_polyubiquitination	0	0	1	1		epilepsy_syndrome	1	protein_polyubiquitination	1	1	1	1		epilepsy_syndrome
epilepsy_syndrome	0	stimulatory_C-type_lectin_receptor_signa...	0	0	1	1		epilepsy_syndrome	1	stimulatory_C-type_lectin_receptor_signa...	0	0	1	1		epilepsy_syndrome	9	stimulatory_C-type_lectin_receptor_signa...	1	0	1	1		epilepsy_syndrome	0	stimulatory_C-type_lectin_receptor_signa...	0	0	1	1			epilepsy_syndrome	4	stimulatory_C-type_lectin_receptor_signa...	2	0	1	1		epilepsy_syndrome	1	stimulatory_C-type_lectin_receptor_signa...	1	1	1	1		epilepsy_syndrome
epilepsy_syndrome	0	antigen_processing_and_presentation_of_e...	0	0	1	1		epilepsy_syndrome	1	antigen_processing_and_presentation_of_e...	0	0	1	1		epilepsy_syndrome	9	antigen_processing_and_presentation_of_e...	0	0	1	1		epilepsy_syndrome	0	antigen_processing_and_presentation_of_e...	0	0	1	1			epilepsy_syndrome	4	antigen_processing_and_presentation_of_e...	0	0	1	1		epilepsy_syndrome	1	antigen_processing_and_presentation_of_e...	1	1	1	1		epilepsy_syndrome
epilepsy_syndrome	0	translational_initiation	0	0	1	1		epilepsy_syndrome	1	translational_initiation	0	0	1	1		epilepsy_syndrome	9	translational_initiation	1	0	1	1		epilepsy_syndrome	0	translational_initiation	1	0	1	1			epilepsy_syndrome	4	translational_initiation	2	0	1	1		epilepsy_syndrome	1	translational_initiation	0	0	1	1		epilepsy_syndrome
epilepsy_syndrome	0	regulation_of_cellular_amino_acid_metabo...	0	0	1	1		epilepsy_syndrome	1	regulation_of_cellular_amino_acid_metabo...	0	0	1	1		epilepsy_syndrome	9	regulation_of_cellular_amino_acid_metabo...	0	0	1	1		epilepsy_syndrome	0	regulation_of_cellular_amino_acid_metabo...	0	0	1	1			epilepsy_syndrome	4	regulation_of_cellular_amino_acid_metabo...	0	0	1	1		epilepsy_syndrome	1	regulation_of_cellular_amino_acid_metabo...	0	0	1	1		epilepsy_syndrome
epilepsy_syndrome	0	SRP-dependent_cotranslational_protein_ta...	0	0	1	1		epilepsy_syndrome	1	SRP-dependent_cotranslational_protein_ta...	0	0	1	1		epilepsy_syndrome	9	SRP-dependent_cotranslational_protein_ta...	0	0	1	1		epilepsy_syndrome	0	SRP-dependent_cotranslational_protein_ta...	0	0	1	1			epilepsy_syndrome	4	SRP-dependent_cotranslational_protein_ta...	0	0	1	1		epilepsy_syndrome	1	SRP-dependent_cotranslational_protein_ta...	0	0	1	1		epilepsy_syndrome
epilepsy_syndrome	0	DNA_damage_response,_signal_transduction...	0	0	1	1		epilepsy_syndrome	1	DNA_damage_response,_signal_transduction...	0	0	1	1		epilepsy_syndrome	9	DNA_damage_response,_signal_transduction...	0	0	1	1		epilepsy_syndrome	0	DNA_damage_response,_signal_transduction...	0	0	1	1			epilepsy_syndrome	4	DNA_damage_response,_signal_transduction...	0	0	1	1		epilepsy_syndrome	1	DNA_damage_response,_signal_transduction...	1	1	1	1		epilepsy_syndrome
epilepsy_syndrome	0	epidermal_growth_factor_receptor_signali...	1	0	1	1		epilepsy_syndrome	1	epidermal_growth_factor_receptor_signali...	1	1	1	1		epilepsy_syndrome	9	epidermal_growth_factor_receptor_signali...	12	3	0.0104462	1		epilepsy_syndrome	0	epidermal_growth_factor_receptor_signali...	0	0	1	1			epilepsy_syndrome	4	epidermal_growth_factor_receptor_signali...	4	1	1	1		epilepsy_syndrome	1	epidermal_growth_factor_receptor_signali...	2	1	1	1		epilepsy_syndrome
epilepsy_syndrome	0	small_GTPase_mediated_signal_transductio...	0	0	1	1		epilepsy_syndrome	1	small_GTPase_mediated_signal_transductio...	1	1	1	1		epilepsy_syndrome	9	small_GTPase_mediated_signal_transductio...	19	3	0.0365732	1		epilepsy_syndrome	0	small_GTPase_mediated_signal_transductio...	1	0	1	1			epilepsy_syndrome	4	small_GTPase_mediated_signal_transductio...	11	3	9.26e-05	0.0999308		epilepsy_syndrome	1	small_GTPase_mediated_signal_transductio...	2	1	1	1		epilepsy_syndrome
epilepsy_syndrome	0	Ras_protein_signal_transduction	0	0	1	1		epilepsy_syndrome	1	Ras_protein_signal_transduction	1	1	1	1		epilepsy_syndrome	9	Ras_protein_signal_transduction	12	3	0.0104462	1		epilepsy_syndrome	0	Ras_protein_signal_transduction	0	0	1	1			epilepsy_syndrome	4	Ras_protein_signal_transduction	6	1	1	1		epilepsy_syndrome	1	Ras_protein_signal_transduction	2	1	1	1		epilepsy_syndrome
epilepsy_syndrome	0	synaptic_transmission	0	0	1	1		epilepsy_syndrome	1	synaptic_transmission	0	0	1	1		epilepsy_syndrome	9	synaptic_transmission	27	9	3.81e-09	6.90752e-05	***	epilepsy_syndrome	0	synaptic_transmission	1	0	1	1			epilepsy_syndrome	4	synaptic_transmission	4	2	1	1		epilepsy_syndrome	1	synaptic_transmission	1	0	1	1		epilepsy_syndrome
epilepsy_syndrome	0	neurotransmitter_secretion	0	0	1	1		epilepsy_syndrome	1	neurotransmitter_secretion	0	0	1	1		epilepsy_syndrome	9	neurotransmitter_secretion	6	3	0.00114837	0.72797		epilepsy_syndrome	0	neurotransmitter_secretion	0	0	1	1			epilepsy_syndrome	4	neurotransmitter_secretion	1	1	1	1		epilepsy_syndrome	1	neurotransmitter_secretion	1	0	1	1		epilepsy_syndrome
epilepsy_syndrome	0	axon_guidance	0	0	1	1		epilepsy_syndrome	1	axon_guidance	1	1	1	1		epilepsy_syndrome	9	axon_guidance	19	4	0.00495908	1		epilepsy_syndrome	0	axon_guidance	1	0	1	1			epilepsy_syndrome	4	axon_guidance	9	2	1	1		epilepsy_syndrome	1	axon_guidance	3	1	1	1		epilepsy_syndrome
epilepsy_syndrome	0	synapse_assembly	0	0	1	1		epilepsy_syndrome	1	synapse_assembly	0	0	1	1		epilepsy_syndrome	9	synapse_assembly	9	3	0.00438934	1		epilepsy_syndrome	0	synapse_assembly	0	0	1	1			epilepsy_syndrome	4	synapse_assembly	1	0	1	1		epilepsy_syndrome	1	synapse_assembly	0	0	1	1		epilepsy_syndrome
epilepsy_syndrome	0	insulin_receptor_signaling_pathway	0	0	1	1		epilepsy_syndrome	1	insulin_receptor_signaling_pathway	1	1	1	1		epilepsy_syndrome	9	insulin_receptor_signaling_pathway	10	3	0.00607453	1		epilepsy_syndrome	0	insulin_receptor_signaling_pathway	0	0	1	1			epilepsy_syndrome	4	insulin_receptor_signaling_pathway	2	0	1	1		epilepsy_syndrome	1	insulin_receptor_signaling_pathway	2	1	1	1		epilepsy_syndrome
epilepsy_syndrome	0	fibroblast_growth_factor_receptor_signal...	0	0	1	1		epilepsy_syndrome	1	fibroblast_growth_factor_receptor_signal...	1	1	1	1		epilepsy_syndrome	9	fibroblast_growth_factor_receptor_signal...	10	3	0.00607453	1		epilepsy_syndrome	0	fibroblast_growth_factor_receptor_signal...	0	0	1	1			epilepsy_syndrome	4	fibroblast_growth_factor_receptor_signal...	3	0	1	1		epilepsy_syndrome	1	fibroblast_growth_factor_receptor_signal...	2	1	1	1		epilepsy_syndrome
epilepsy_syndrome	0	proteasomal_ubiquitin-independent_protei...	0	0	1	1		epilepsy_syndrome	1	proteasomal_ubiquitin-independent_protei...	0	0	1	1		epilepsy_syndrome	9	proteasomal_ubiquitin-independent_protei...	0	0	1	1		epilepsy_syndrome	0	proteasomal_ubiquitin-independent_protei...	0	0	1	1			epilepsy_syndrome	4	proteasomal_ubiquitin-independent_protei...	0	0	1	1		epilepsy_syndrome	1	proteasomal_ubiquitin-independent_protei...	0	0	1	1		epilepsy_syndrome
epilepsy_syndrome	0	viral_process	0	0	1	1		epilepsy_syndrome	1	viral_process	0	0	1	1		epilepsy_syndrome	9	viral_process	1	0	1	1		epilepsy_syndrome	0	viral_process	0	0	1	1			epilepsy_syndrome	4	viral_process	4	1	1	1		epilepsy_syndrome	1	viral_process	3	1	1	1		epilepsy_syndrome
epilepsy_syndrome	0	substantia_nigra_development	0	0	1	1		epilepsy_syndrome	1	substantia_nigra_development	0	0	1	1		epilepsy_syndrome	9	substantia_nigra_development	1	0	1	1		epilepsy_syndrome	0	substantia_nigra_development	0	0	1	1			epilepsy_syndrome	4	substantia_nigra_development	5	1	1	1		epilepsy_syndrome	1	substantia_nigra_development	0	0	1	1		epilepsy_syndrome
epilepsy_syndrome	0	platelet_activation	0	0	1	1		epilepsy_syndrome	1	platelet_activation	0	0	1	1		epilepsy_syndrome	9	platelet_activation	5	0	1	1		epilepsy_syndrome	0	platelet_activation	0	0	1	1			epilepsy_syndrome	4	platelet_activation	7	1	1	1		epilepsy_syndrome	1	platelet_activation	1	0	1	1		epilepsy_syndrome
epilepsy_syndrome	0	anaphase-promoting_complex-dependent_pro...	0	0	1	1		epilepsy_syndrome	1	anaphase-promoting_complex-dependent_pro...	0	0	1	1		epilepsy_syndrome	9	anaphase-promoting_complex-dependent_pro...	0	0	1	1		epilepsy_syndrome	0	anaphase-promoting_complex-dependent_pro...	0	0	1	1			epilepsy_syndrome	4	anaphase-promoting_complex-dependent_pro...	1	0	1	1		epilepsy_syndrome	1	anaphase-promoting_complex-dependent_pro...	1	1	1	1		epilepsy_syndrome
epilepsy_syndrome	0	tumor_necrosis_factor-mediated_signaling...	0	0	1	1		epilepsy_syndrome	1	tumor_necrosis_factor-mediated_signaling...	0	0	1	1		epilepsy_syndrome	9	tumor_necrosis_factor-mediated_signaling...	1	0	1	1		epilepsy_syndrome	0	tumor_necrosis_factor-mediated_signaling...	0	0	1	1			epilepsy_syndrome	4	tumor_necrosis_factor-mediated_signaling...	0	0	1	1		epilepsy_syndrome	1	tumor_necrosis_factor-mediated_signaling...	1	1	1	1		epilepsy_syndrome
epilepsy_syndrome	0	cell_junction_assembly	0	0	1	1		epilepsy_syndrome	1	cell_junction_assembly	0	0	1	1		epilepsy_syndrome	9	cell_junction_assembly	14	0	1	1		epilepsy_syndrome	0	cell_junction_assembly	0	0	1	1			epilepsy_syndrome	4	cell_junction_assembly	6	1	1	1		epilepsy_syndrome	1	cell_junction_assembly	0	0	1	1		epilepsy_syndrome
epilepsy_syndrome	0	adherens_junction_organization	0	0	1	1		epilepsy_syndrome	1	adherens_junction_organization	0	0	1	1		epilepsy_syndrome	9	adherens_junction_organization	10	0	1	1		epilepsy_syndrome	0	adherens_junction_organization	0	0	1	1			epilepsy_syndrome	4	adherens_junction_organization	6	2	1	1		epilepsy_syndrome	1	adherens_junction_organization	0	0	1	1		epilepsy_syndrome
epilepsy_syndrome	0	social_behavior	0	0	1	1		epilepsy_syndrome	1	social_behavior	0	0	1	1		epilepsy_syndrome	9	social_behavior	7	2	1	1		epilepsy_syndrome	0	social_behavior	0	0	1	1			epilepsy_syndrome	4	social_behavior	1	0	1	1		epilepsy_syndrome	1	social_behavior	0	0	1	1		epilepsy_syndrome
epilepsy_syndrome	0	NIK/NF-kappaB_signaling	0	0	1	1		epilepsy_syndrome	1	NIK/NF-kappaB_signaling	0	0	1	1		epilepsy_syndrome	9	NIK/NF-kappaB_signaling	1	0	1	1		epilepsy_syndrome	0	NIK/NF-kappaB_signaling	0	0	1	1			epilepsy_syndrome	4	NIK/NF-kappaB_signaling	0	0	1	1		epilepsy_syndrome	1	NIK/NF-kappaB_signaling	1	1	1	1		epilepsy_syndrome
epilepsy_syndrome	0	Fc-epsilon_receptor_signaling_pathway	0	0	1	1		epilepsy_syndrome	1	Fc-epsilon_receptor_signaling_pathway	1	1	1	1		epilepsy_syndrome	9	Fc-epsilon_receptor_signaling_pathway	9	3	0.00438934	1		epilepsy_syndrome	0	Fc-epsilon_receptor_signaling_pathway	0	0	1	1			epilepsy_syndrome	4	Fc-epsilon_receptor_signaling_pathway	3	1	1	1		epilepsy_syndrome	1	Fc-epsilon_receptor_signaling_pathway	2	1	1	1		epilepsy_syndrome
epilepsy_syndrome	0	Fc-gamma_receptor_signaling_pathway_invo...	0	0	1	1		epilepsy_syndrome	1	Fc-gamma_receptor_signaling_pathway_invo...	0	0	1	1		epilepsy_syndrome	9	Fc-gamma_receptor_signaling_pathway_invo...	4	0	1	1		epilepsy_syndrome	0	Fc-gamma_receptor_signaling_pathway_invo...	1	0	1	1			epilepsy_syndrome	4	Fc-gamma_receptor_signaling_pathway_invo...	4	2	1	1		epilepsy_syndrome	1	Fc-gamma_receptor_signaling_pathway_invo...	1	0	1	1		epilepsy_syndrome
epilepsy_syndrome	0	negative_regulation_of_epidermal_growth_...	0	0	1	1		epilepsy_syndrome	1	negative_regulation_of_epidermal_growth_...	0	0	1	1		epilepsy_syndrome	9	negative_regulation_of_epidermal_growth_...	2	0	1	1		epilepsy_syndrome	0	negative_regulation_of_epidermal_growth_...	0	0	1	1			epilepsy_syndrome	4	negative_regulation_of_epidermal_growth_...	2	1	1	1		epilepsy_syndrome	1	negative_regulation_of_epidermal_growth_...	2	1	1	1		epilepsy_syndrome
epilepsy_syndrome	0	negative_regulation_of_apoptotic_process	0	0	1	1		epilepsy_syndrome	1	negative_regulation_of_apoptotic_process	0	0	1	1		epilepsy_syndrome	9	negative_regulation_of_apoptotic_process	5	2	1	1		epilepsy_syndrome	0	negative_regulation_of_apoptotic_process	1	0	1	1			epilepsy_syndrome	4	negative_regulation_of_apoptotic_process	5	0	1	1		epilepsy_syndrome	1	negative_regulation_of_apoptotic_process	1	1	1	1		epilepsy_syndrome
epilepsy_syndrome	0	innate_immune_response	1	0	1	1		epilepsy_syndrome	1	innate_immune_response	1	1	1	1		epilepsy_syndrome	9	innate_immune_response	16	3	0.0233465	1		epilepsy_syndrome	0	innate_immune_response	2	0	1	1			epilepsy_syndrome	4	innate_immune_response	9	2	1	1		epilepsy_syndrome	1	innate_immune_response	2	1	1	1		epilepsy_syndrome
epilepsy_syndrome	0	positive_regulation_of_RNA_polymerase_II...	0	0	1	1		epilepsy_syndrome	1	positive_regulation_of_RNA_polymerase_II...	0	0	1	1		epilepsy_syndrome	9	positive_regulation_of_RNA_polymerase_II...	0	0	1	1		epilepsy_syndrome	0	positive_regulation_of_RNA_polymerase_II...	0	0	1	1			epilepsy_syndrome	4	positive_regulation_of_RNA_polymerase_II...	0	0	1	1		epilepsy_syndrome	1	positive_regulation_of_RNA_polymerase_II...	0	0	1	1		epilepsy_syndrome
epilepsy_syndrome	0	GMP_metabolic_process	0	0	1	1		epilepsy_syndrome	1	GMP_metabolic_process	0	0	1	1		epilepsy_syndrome	9	GMP_metabolic_process	4	2	1	1		epilepsy_syndrome	0	GMP_metabolic_process	0	0	1	1			epilepsy_syndrome	4	GMP_metabolic_process	1	0	1	1		epilepsy_syndrome	1	GMP_metabolic_process	0	0	1	1		epilepsy_syndrome
epilepsy_syndrome	0	GDP_metabolic_process	0	0	1	1		epilepsy_syndrome	1	GDP_metabolic_process	0	0	1	1		epilepsy_syndrome	9	GDP_metabolic_process	4	2	1	1		epilepsy_syndrome	0	GDP_metabolic_process	0	0	1	1			epilepsy_syndrome	4	GDP_metabolic_process	1	0	1	1		epilepsy_syndrome	1	GDP_metabolic_process	0	0	1	1		epilepsy_syndrome
epilepsy_syndrome	0	vascular_endothelial_growth_factor_recep...	0	0	1	1		epilepsy_syndrome	1	vascular_endothelial_growth_factor_recep...	1	1	1	1		epilepsy_syndrome	9	vascular_endothelial_growth_factor_recep...	14	3	0.0162009	1		epilepsy_syndrome	0	vascular_endothelial_growth_factor_recep...	0	0	1	1			epilepsy_syndrome	4	vascular_endothelial_growth_factor_recep...	6	2	1	1		epilepsy_syndrome	1	vascular_endothelial_growth_factor_recep...	2	1	1	1		epilepsy_syndrome
epilepsy_syndrome	0	neurotrophin_TRK_receptor_signaling_path...	0	0	1	1		epilepsy_syndrome	1	neurotrophin_TRK_receptor_signaling_path...	1	1	1	1		epilepsy_syndrome	9	neurotrophin_TRK_receptor_signaling_path...	10	3	0.00607453	1		epilepsy_syndrome	0	neurotrophin_TRK_receptor_signaling_path...	0	0	1	1			epilepsy_syndrome	4	neurotrophin_TRK_receptor_signaling_path...	5	1	1	1		epilepsy_syndrome	1	neurotrophin_TRK_receptor_signaling_path...	2	1	1	1		epilepsy_syndrome
epilepsy_syndrome	0	ephrin_receptor_signaling_pathway	0	0	1	1		epilepsy_syndrome	1	ephrin_receptor_signaling_pathway	0	0	1	1		epilepsy_syndrome	9	ephrin_receptor_signaling_pathway	9	2	1	1		epilepsy_syndrome	0	ephrin_receptor_signaling_pathway	1	0	1	1			epilepsy_syndrome	4	ephrin_receptor_signaling_pathway	6	2	1	1		epilepsy_syndrome	1	ephrin_receptor_signaling_pathway	0	0	1	1		epilepsy_syndrome
epilepsy_syndrome	0	regulation_of_synaptic_plasticity	0	0	1	1		epilepsy_syndrome	1	regulation_of_synaptic_plasticity	0	0	1	1		epilepsy_syndrome	9	regulation_of_synaptic_plasticity	13	4	0.00107778	0.688033		epilepsy_syndrome	0	regulation_of_synaptic_plasticity	1	0	1	1			epilepsy_syndrome	4	regulation_of_synaptic_plasticity	1	0	1	1		epilepsy_syndrome	1	regulation_of_synaptic_plasticity	0	0	1	1		epilepsy_syndrome
epilepsy_syndrome	0	neuromuscular_process_controlling_balanc...	0	0	1	1		epilepsy_syndrome	1	neuromuscular_process_controlling_balanc...	0	0	1	1		epilepsy_syndrome	9	neuromuscular_process_controlling_balanc...	5	2	1	1		epilepsy_syndrome	0	neuromuscular_process_controlling_balanc...	0	0	1	1			epilepsy_syndrome	4	neuromuscular_process_controlling_balanc...	0	0	1	1		epilepsy_syndrome	1	neuromuscular_process_controlling_balanc...	0	0	1	1		epilepsy_syndrome
epilepsy_syndrome	0	actin_filament_bundle_assembly	0	0	1	1		epilepsy_syndrome	1	actin_filament_bundle_assembly	0	0	1	1		epilepsy_syndrome	9	actin_filament_bundle_assembly	7	0	1	1		epilepsy_syndrome	0	actin_filament_bundle_assembly	1	0	1	1			epilepsy_syndrome	4	actin_filament_bundle_assembly	3	3	5.74e-07	0.00380082	**	epilepsy_syndrome	1	actin_filament_bundle_assembly	0	0	1	1		epilepsy_syndrome
epilepsy_syndrome	0	'de_novo'_posttranslational_protein_fold...	0	0	1	1		epilepsy_syndrome	1	'de_novo'_posttranslational_protein_fold...	0	0	1	1		epilepsy_syndrome	9	'de_novo'_posttranslational_protein_fold...	1	0	1	1		epilepsy_syndrome	0	'de_novo'_posttranslational_protein_fold...	0	0	1	1			epilepsy_syndrome	4	'de_novo'_posttranslational_protein_fold...	2	0	1	1		epilepsy_syndrome	1	'de_novo'_posttranslational_protein_fold...	1	0	1	1		epilepsy_syndrome
epilepsy_syndrome	0	negative_regulation_of_ubiquitin-protein...	0	0	1	1		epilepsy_syndrome	1	negative_regulation_of_ubiquitin-protein...	0	0	1	1		epilepsy_syndrome	9	negative_regulation_of_ubiquitin-protein...	0	0	1	1		epilepsy_syndrome	0	negative_regulation_of_ubiquitin-protein...	0	0	1	1			epilepsy_syndrome	4	negative_regulation_of_ubiquitin-protein...	0	0	1	1		epilepsy_syndrome	1	negative_regulation_of_ubiquitin-protein...	1	1	1	1		epilepsy_syndrome
epilepsy_syndrome	0	positive_regulation_of_ubiquitin-protein...	0	0	1	1		epilepsy_syndrome	1	positive_regulation_of_ubiquitin-protein...	0	0	1	1		epilepsy_syndrome	9	positive_regulation_of_ubiquitin-protein...	0	0	1	1		epilepsy_syndrome	0	positive_regulation_of_ubiquitin-protein...	0	0	1	1			epilepsy_syndrome	4	positive_regulation_of_ubiquitin-protein...	0	0	1	1		epilepsy_syndrome	1	positive_regulation_of_ubiquitin-protein...	1	1	1	1		epilepsy_syndrome
epilepsy_syndrome	0	actin_filament_capping	0	0	1	1		epilepsy_syndrome	1	actin_filament_capping	1	1	1	1		epilepsy_syndrome	9	actin_filament_capping	6	0	1	1		epilepsy_syndrome	0	actin_filament_capping	1	0	1	1			epilepsy_syndrome	4	actin_filament_capping	0	0	1	1		epilepsy_syndrome	1	actin_filament_capping	0	0	1	1		epilepsy_syndrome
epilepsy_syndrome	0	vocalization_behavior	0	0	1	1		epilepsy_syndrome	1	vocalization_behavior	0	0	1	1		epilepsy_syndrome	9	vocalization_behavior	6	1	1	1		epilepsy_syndrome	0	vocalization_behavior	0	0	1	1			epilepsy_syndrome	4	vocalization_behavior	0	0	1	1		epilepsy_syndrome	1	vocalization_behavior	0	0	1	1		epilepsy_syndrome
epilepsy_syndrome	0	negative_regulation_of_canonical_Wnt_sig...	0	0	1	1		epilepsy_syndrome	1	negative_regulation_of_canonical_Wnt_sig...	0	0	1	1		epilepsy_syndrome	9	negative_regulation_of_canonical_Wnt_sig...	3	0	1	1		epilepsy_syndrome	0	negative_regulation_of_canonical_Wnt_sig...	0	0	1	1			epilepsy_syndrome	4	negative_regulation_of_canonical_Wnt_sig...	1	0	1	1		epilepsy_syndrome	1	negative_regulation_of_canonical_Wnt_sig...	1	1	1	1		epilepsy_syndrome
epilepsy_syndrome	0	positive_regulation_of_canonical_Wnt_sig...	0	0	1	1		epilepsy_syndrome	1	positive_regulation_of_canonical_Wnt_sig...	0	0	1	1		epilepsy_syndrome	9	positive_regulation_of_canonical_Wnt_sig...	2	0	1	1		epilepsy_syndrome	0	positive_regulation_of_canonical_Wnt_sig...	0	0	1	1			epilepsy_syndrome	4	positive_regulation_of_canonical_Wnt_sig...	0	0	1	1		epilepsy_syndrome	1	positive_regulation_of_canonical_Wnt_sig...	1	1	1	1		epilepsy_syndrome
epilepsy_syndrome	0	intrinsic_apoptotic_signaling_pathway	0	0	1	1		epilepsy_syndrome	1	intrinsic_apoptotic_signaling_pathway	0	0	1	1		epilepsy_syndrome	9	intrinsic_apoptotic_signaling_pathway	3	0	1	1		epilepsy_syndrome	0	intrinsic_apoptotic_signaling_pathway	0	0	1	1			epilepsy_syndrome	4	intrinsic_apoptotic_signaling_pathway	2	0	1	1		epilepsy_syndrome	1	intrinsic_apoptotic_signaling_pathway	0	0	1	1		epilepsy_syndrome
epilepsy_syndrome	0	toxin_transport	0	0	1	1		epilepsy_syndrome	1	toxin_transport	0	0	1	1		epilepsy_syndrome	9	toxin_transport	0	0	1	1		epilepsy_syndrome	0	toxin_transport	0	0	1	1			epilepsy_syndrome	4	toxin_transport	1	0	1	1		epilepsy_syndrome	1	toxin_transport	0	0	1	1		epilepsy_syndrome
epilepsy_syndrome	0	positive_regulation_of_excitatory_postsy...	0	0	1	1		epilepsy_syndrome	1	positive_regulation_of_excitatory_postsy...	0	0	1	1		epilepsy_syndrome	9	positive_regulation_of_excitatory_postsy...	8	2	1	1		epilepsy_syndrome	0	positive_regulation_of_excitatory_postsy...	0	0	1	1			epilepsy_syndrome	4	positive_regulation_of_excitatory_postsy...	0	0	1	1		epilepsy_syndrome	1	positive_regulation_of_excitatory_postsy...	0	0	1	1		epilepsy_syndrome
autonomic_nervous_system_neoplasm	0	G2/M_transition_of_mitotic_cell_cycle	0	0	1	1		autonomic_nervous_system_neoplasm	0	G2/M_transition_of_mitotic_cell_cycle	0	0	1	1		autonomic_nervous_system_neoplasm	5	G2/M_transition_of_mitotic_cell_cycle	0	0	1	1		autonomic_nervous_system_neoplasm	0	G2/M_transition_of_mitotic_cell_cycle	0	0	1	1			autonomic_nervous_system_neoplasm	3	G2/M_transition_of_mitotic_cell_cycle	2	0	1	1		autonomic_nervous_system_neoplasm	0	G2/M_transition_of_mitotic_cell_cycle	1	0	1	1		autonomic_nervous_system_neoplasm
autonomic_nervous_system_neoplasm	0	nuclear-transcribed_mRNA_catabolic_proce...	0	0	1	1		autonomic_nervous_system_neoplasm	0	nuclear-transcribed_mRNA_catabolic_proce...	0	0	1	1		autonomic_nervous_system_neoplasm	5	nuclear-transcribed_mRNA_catabolic_proce...	0	0	1	1		autonomic_nervous_system_neoplasm	0	nuclear-transcribed_mRNA_catabolic_proce...	0	0	1	1			autonomic_nervous_system_neoplasm	3	nuclear-transcribed_mRNA_catabolic_proce...	1	0	1	1		autonomic_nervous_system_neoplasm	0	nuclear-transcribed_mRNA_catabolic_proce...	0	0	1	1		autonomic_nervous_system_neoplasm
autonomic_nervous_system_neoplasm	0	activation_of_MAPKK_activity	0	0	1	1		autonomic_nervous_system_neoplasm	0	activation_of_MAPKK_activity	1	0	1	1		autonomic_nervous_system_neoplasm	5	activation_of_MAPKK_activity	10	1	1	1		autonomic_nervous_system_neoplasm	0	activation_of_MAPKK_activity	0	0	1	1			autonomic_nervous_system_neoplasm	3	activation_of_MAPKK_activity	3	0	1	1		autonomic_nervous_system_neoplasm	0	activation_of_MAPKK_activity	2	0	1	1		autonomic_nervous_system_neoplasm
autonomic_nervous_system_neoplasm	0	protein_polyubiquitination	0	0	1	1		autonomic_nervous_system_neoplasm	0	protein_polyubiquitination	0	0	1	1		autonomic_nervous_system_neoplasm	5	protein_polyubiquitination	0	0	1	1		autonomic_nervous_system_neoplasm	0	protein_polyubiquitination	0	0	1	1			autonomic_nervous_system_neoplasm	3	protein_polyubiquitination	0	0	1	1		autonomic_nervous_system_neoplasm	0	protein_polyubiquitination	1	0	1	1		autonomic_nervous_system_neoplasm
autonomic_nervous_system_neoplasm	0	stimulatory_C-type_lectin_receptor_signa...	0	0	1	1		autonomic_nervous_system_neoplasm	0	stimulatory_C-type_lectin_receptor_signa...	0	0	1	1		autonomic_nervous_system_neoplasm	5	stimulatory_C-type_lectin_receptor_signa...	1	1	1	1		autonomic_nervous_system_neoplasm	0	stimulatory_C-type_lectin_receptor_signa...	0	0	1	1			autonomic_nervous_system_neoplasm	3	stimulatory_C-type_lectin_receptor_signa...	2	0	1	1		autonomic_nervous_system_neoplasm	0	stimulatory_C-type_lectin_receptor_signa...	1	0	1	1		autonomic_nervous_system_neoplasm
autonomic_nervous_system_neoplasm	0	antigen_processing_and_presentation_of_e...	0	0	1	1		autonomic_nervous_system_neoplasm	0	antigen_processing_and_presentation_of_e...	0	0	1	1		autonomic_nervous_system_neoplasm	5	antigen_processing_and_presentation_of_e...	0	0	1	1		autonomic_nervous_system_neoplasm	0	antigen_processing_and_presentation_of_e...	0	0	1	1			autonomic_nervous_system_neoplasm	3	antigen_processing_and_presentation_of_e...	0	0	1	1		autonomic_nervous_system_neoplasm	0	antigen_processing_and_presentation_of_e...	1	0	1	1		autonomic_nervous_system_neoplasm
autonomic_nervous_system_neoplasm	0	translational_initiation	0	0	1	1		autonomic_nervous_system_neoplasm	0	translational_initiation	0	0	1	1		autonomic_nervous_system_neoplasm	5	translational_initiation	1	0	1	1		autonomic_nervous_system_neoplasm	0	translational_initiation	1	0	1	1			autonomic_nervous_system_neoplasm	3	translational_initiation	2	0	1	1		autonomic_nervous_system_neoplasm	0	translational_initiation	0	0	1	1		autonomic_nervous_system_neoplasm
autonomic_nervous_system_neoplasm	0	regulation_of_cellular_amino_acid_metabo...	0	0	1	1		autonomic_nervous_system_neoplasm	0	regulation_of_cellular_amino_acid_metabo...	0	0	1	1		autonomic_nervous_system_neoplasm	5	regulation_of_cellular_amino_acid_metabo...	0	0	1	1		autonomic_nervous_system_neoplasm	0	regulation_of_cellular_amino_acid_metabo...	0	0	1	1			autonomic_nervous_system_neoplasm	3	regulation_of_cellular_amino_acid_metabo...	0	0	1	1		autonomic_nervous_system_neoplasm	0	regulation_of_cellular_amino_acid_metabo...	0	0	1	1		autonomic_nervous_system_neoplasm
autonomic_nervous_system_neoplasm	0	SRP-dependent_cotranslational_protein_ta...	0	0	1	1		autonomic_nervous_system_neoplasm	0	SRP-dependent_cotranslational_protein_ta...	0	0	1	1		autonomic_nervous_system_neoplasm	5	SRP-dependent_cotranslational_protein_ta...	0	0	1	1		autonomic_nervous_system_neoplasm	0	SRP-dependent_cotranslational_protein_ta...	0	0	1	1			autonomic_nervous_system_neoplasm	3	SRP-dependent_cotranslational_protein_ta...	0	0	1	1		autonomic_nervous_system_neoplasm	0	SRP-dependent_cotranslational_protein_ta...	0	0	1	1		autonomic_nervous_system_neoplasm
autonomic_nervous_system_neoplasm	0	DNA_damage_response,_signal_transduction...	0	0	1	1		autonomic_nervous_system_neoplasm	0	DNA_damage_response,_signal_transduction...	0	0	1	1		autonomic_nervous_system_neoplasm	5	DNA_damage_response,_signal_transduction...	0	0	1	1		autonomic_nervous_system_neoplasm	0	DNA_damage_response,_signal_transduction...	0	0	1	1			autonomic_nervous_system_neoplasm	3	DNA_damage_response,_signal_transduction...	0	0	1	1		autonomic_nervous_system_neoplasm	0	DNA_damage_response,_signal_transduction...	1	0	1	1		autonomic_nervous_system_neoplasm
autonomic_nervous_system_neoplasm	0	epidermal_growth_factor_receptor_signali...	1	0	1	1		autonomic_nervous_system_neoplasm	0	epidermal_growth_factor_receptor_signali...	1	0	1	1		autonomic_nervous_system_neoplasm	5	epidermal_growth_factor_receptor_signali...	12	1	1	1		autonomic_nervous_system_neoplasm	0	epidermal_growth_factor_receptor_signali...	0	0	1	1			autonomic_nervous_system_neoplasm	3	epidermal_growth_factor_receptor_signali...	4	0	1	1		autonomic_nervous_system_neoplasm	0	epidermal_growth_factor_receptor_signali...	2	0	1	1		autonomic_nervous_system_neoplasm
autonomic_nervous_system_neoplasm	0	small_GTPase_mediated_signal_transductio...	0	0	1	1		autonomic_nervous_system_neoplasm	0	small_GTPase_mediated_signal_transductio...	1	0	1	1		autonomic_nervous_system_neoplasm	5	small_GTPase_mediated_signal_transductio...	19	2	1	1		autonomic_nervous_system_neoplasm	0	small_GTPase_mediated_signal_transductio...	1	0	1	1			autonomic_nervous_system_neoplasm	3	small_GTPase_mediated_signal_transductio...	11	1	1	1		autonomic_nervous_system_neoplasm	0	small_GTPase_mediated_signal_transductio...	2	0	1	1		autonomic_nervous_system_neoplasm
autonomic_nervous_system_neoplasm	0	Ras_protein_signal_transduction	0	0	1	1		autonomic_nervous_system_neoplasm	0	Ras_protein_signal_transduction	1	0	1	1		autonomic_nervous_system_neoplasm	5	Ras_protein_signal_transduction	12	1	1	1		autonomic_nervous_system_neoplasm	0	Ras_protein_signal_transduction	0	0	1	1			autonomic_nervous_system_neoplasm	3	Ras_protein_signal_transduction	6	1	1	1		autonomic_nervous_system_neoplasm	0	Ras_protein_signal_transduction	2	0	1	1		autonomic_nervous_system_neoplasm
autonomic_nervous_system_neoplasm	0	synaptic_transmission	0	0	1	1		autonomic_nervous_system_neoplasm	0	synaptic_transmission	0	0	1	1		autonomic_nervous_system_neoplasm	5	synaptic_transmission	27	2	1	1		autonomic_nervous_system_neoplasm	0	synaptic_transmission	1	0	1	1			autonomic_nervous_system_neoplasm	3	synaptic_transmission	4	0	1	1		autonomic_nervous_system_neoplasm	0	synaptic_transmission	1	0	1	1		autonomic_nervous_system_neoplasm
autonomic_nervous_system_neoplasm	0	neurotransmitter_secretion	0	0	1	1		autonomic_nervous_system_neoplasm	0	neurotransmitter_secretion	0	0	1	1		autonomic_nervous_system_neoplasm	5	neurotransmitter_secretion	6	0	1	1		autonomic_nervous_system_neoplasm	0	neurotransmitter_secretion	0	0	1	1			autonomic_nervous_system_neoplasm	3	neurotransmitter_secretion	1	0	1	1		autonomic_nervous_system_neoplasm	0	neurotransmitter_secretion	1	0	1	1		autonomic_nervous_system_neoplasm
autonomic_nervous_system_neoplasm	0	axon_guidance	0	0	1	1		autonomic_nervous_system_neoplasm	0	axon_guidance	1	0	1	1		autonomic_nervous_system_neoplasm	5	axon_guidance	19	1	1	1		autonomic_nervous_system_neoplasm	0	axon_guidance	1	0	1	1			autonomic_nervous_system_neoplasm	3	axon_guidance	9	0	1	1		autonomic_nervous_system_neoplasm	0	axon_guidance	3	0	1	1		autonomic_nervous_system_neoplasm
autonomic_nervous_system_neoplasm	0	synapse_assembly	0	0	1	1		autonomic_nervous_system_neoplasm	0	synapse_assembly	0	0	1	1		autonomic_nervous_system_neoplasm	5	synapse_assembly	9	0	1	1		autonomic_nervous_system_neoplasm	0	synapse_assembly	0	0	1	1			autonomic_nervous_system_neoplasm	3	synapse_assembly	1	0	1	1		autonomic_nervous_system_neoplasm	0	synapse_assembly	0	0	1	1		autonomic_nervous_system_neoplasm
autonomic_nervous_system_neoplasm	0	insulin_receptor_signaling_pathway	0	0	1	1		autonomic_nervous_system_neoplasm	0	insulin_receptor_signaling_pathway	1	0	1	1		autonomic_nervous_system_neoplasm	5	insulin_receptor_signaling_pathway	10	1	1	1		autonomic_nervous_system_neoplasm	0	insulin_receptor_signaling_pathway	0	0	1	1			autonomic_nervous_system_neoplasm	3	insulin_receptor_signaling_pathway	2	0	1	1		autonomic_nervous_system_neoplasm	0	insulin_receptor_signaling_pathway	2	0	1	1		autonomic_nervous_system_neoplasm
autonomic_nervous_system_neoplasm	0	fibroblast_growth_factor_receptor_signal...	0	0	1	1		autonomic_nervous_system_neoplasm	0	fibroblast_growth_factor_receptor_signal...	1	0	1	1		autonomic_nervous_system_neoplasm	5	fibroblast_growth_factor_receptor_signal...	10	2	1	1		autonomic_nervous_system_neoplasm	0	fibroblast_growth_factor_receptor_signal...	0	0	1	1			autonomic_nervous_system_neoplasm	3	fibroblast_growth_factor_receptor_signal...	3	0	1	1		autonomic_nervous_system_neoplasm	0	fibroblast_growth_factor_receptor_signal...	2	0	1	1		autonomic_nervous_system_neoplasm
autonomic_nervous_system_neoplasm	0	proteasomal_ubiquitin-independent_protei...	0	0	1	1		autonomic_nervous_system_neoplasm	0	proteasomal_ubiquitin-independent_protei...	0	0	1	1		autonomic_nervous_system_neoplasm	5	proteasomal_ubiquitin-independent_protei...	0	0	1	1		autonomic_nervous_system_neoplasm	0	proteasomal_ubiquitin-independent_protei...	0	0	1	1			autonomic_nervous_system_neoplasm	3	proteasomal_ubiquitin-independent_protei...	0	0	1	1		autonomic_nervous_system_neoplasm	0	proteasomal_ubiquitin-independent_protei...	0	0	1	1		autonomic_nervous_system_neoplasm
autonomic_nervous_system_neoplasm	0	viral_process	0	0	1	1		autonomic_nervous_system_neoplasm	0	viral_process	0	0	1	1		autonomic_nervous_system_neoplasm	5	viral_process	1	1	1	1		autonomic_nervous_system_neoplasm	0	viral_process	0	0	1	1			autonomic_nervous_system_neoplasm	3	viral_process	4	1	1	1		autonomic_nervous_system_neoplasm	0	viral_process	3	0	1	1		autonomic_nervous_system_neoplasm
autonomic_nervous_system_neoplasm	0	substantia_nigra_development	0	0	1	1		autonomic_nervous_system_neoplasm	0	substantia_nigra_development	0	0	1	1		autonomic_nervous_system_neoplasm	5	substantia_nigra_development	1	0	1	1		autonomic_nervous_system_neoplasm	0	substantia_nigra_development	0	0	1	1			autonomic_nervous_system_neoplasm	3	substantia_nigra_development	5	1	1	1		autonomic_nervous_system_neoplasm	0	substantia_nigra_development	0	0	1	1		autonomic_nervous_system_neoplasm
autonomic_nervous_system_neoplasm	0	platelet_activation	0	0	1	1		autonomic_nervous_system_neoplasm	0	platelet_activation	0	0	1	1		autonomic_nervous_system_neoplasm	5	platelet_activation	5	1	1	1		autonomic_nervous_system_neoplasm	0	platelet_activation	0	0	1	1			autonomic_nervous_system_neoplasm	3	platelet_activation	7	1	1	1		autonomic_nervous_system_neoplasm	0	platelet_activation	1	0	1	1		autonomic_nervous_system_neoplasm
autonomic_nervous_system_neoplasm	0	anaphase-promoting_complex-dependent_pro...	0	0	1	1		autonomic_nervous_system_neoplasm	0	anaphase-promoting_complex-dependent_pro...	0	0	1	1		autonomic_nervous_system_neoplasm	5	anaphase-promoting_complex-dependent_pro...	0	0	1	1		autonomic_nervous_system_neoplasm	0	anaphase-promoting_complex-dependent_pro...	0	0	1	1			autonomic_nervous_system_neoplasm	3	anaphase-promoting_complex-dependent_pro...	1	0	1	1		autonomic_nervous_system_neoplasm	0	anaphase-promoting_complex-dependent_pro...	1	0	1	1		autonomic_nervous_system_neoplasm
autonomic_nervous_system_neoplasm	0	tumor_necrosis_factor-mediated_signaling...	0	0	1	1		autonomic_nervous_system_neoplasm	0	tumor_necrosis_factor-mediated_signaling...	0	0	1	1		autonomic_nervous_system_neoplasm	5	tumor_necrosis_factor-mediated_signaling...	1	0	1	1		autonomic_nervous_system_neoplasm	0	tumor_necrosis_factor-mediated_signaling...	0	0	1	1			autonomic_nervous_system_neoplasm	3	tumor_necrosis_factor-mediated_signaling...	0	0	1	1		autonomic_nervous_system_neoplasm	0	tumor_necrosis_factor-mediated_signaling...	1	0	1	1		autonomic_nervous_system_neoplasm
autonomic_nervous_system_neoplasm	0	cell_junction_assembly	0	0	1	1		autonomic_nervous_system_neoplasm	0	cell_junction_assembly	0	0	1	1		autonomic_nervous_system_neoplasm	5	cell_junction_assembly	14	1	1	1		autonomic_nervous_system_neoplasm	0	cell_junction_assembly	0	0	1	1			autonomic_nervous_system_neoplasm	3	cell_junction_assembly	6	0	1	1		autonomic_nervous_system_neoplasm	0	cell_junction_assembly	0	0	1	1		autonomic_nervous_system_neoplasm
autonomic_nervous_system_neoplasm	0	adherens_junction_organization	0	0	1	1		autonomic_nervous_system_neoplasm	0	adherens_junction_organization	0	0	1	1		autonomic_nervous_system_neoplasm	5	adherens_junction_organization	10	1	1	1		autonomic_nervous_system_neoplasm	0	adherens_junction_organization	0	0	1	1			autonomic_nervous_system_neoplasm	3	adherens_junction_organization	6	0	1	1		autonomic_nervous_system_neoplasm	0	adherens_junction_organization	0	0	1	1		autonomic_nervous_system_neoplasm
autonomic_nervous_system_neoplasm	0	social_behavior	0	0	1	1		autonomic_nervous_system_neoplasm	0	social_behavior	0	0	1	1		autonomic_nervous_system_neoplasm	5	social_behavior	7	0	1	1		autonomic_nervous_system_neoplasm	0	social_behavior	0	0	1	1			autonomic_nervous_system_neoplasm	3	social_behavior	1	0	1	1		autonomic_nervous_system_neoplasm	0	social_behavior	0	0	1	1		autonomic_nervous_system_neoplasm
autonomic_nervous_system_neoplasm	0	NIK/NF-kappaB_signaling	0	0	1	1		autonomic_nervous_system_neoplasm	0	NIK/NF-kappaB_signaling	0	0	1	1		autonomic_nervous_system_neoplasm	5	NIK/NF-kappaB_signaling	1	0	1	1		autonomic_nervous_system_neoplasm	0	NIK/NF-kappaB_signaling	0	0	1	1			autonomic_nervous_system_neoplasm	3	NIK/NF-kappaB_signaling	0	0	1	1		autonomic_nervous_system_neoplasm	0	NIK/NF-kappaB_signaling	1	0	1	1		autonomic_nervous_system_neoplasm
autonomic_nervous_system_neoplasm	0	Fc-epsilon_receptor_signaling_pathway	0	0	1	1		autonomic_nervous_system_neoplasm	0	Fc-epsilon_receptor_signaling_pathway	1	0	1	1		autonomic_nervous_system_neoplasm	5	Fc-epsilon_receptor_signaling_pathway	9	1	1	1		autonomic_nervous_system_neoplasm	0	Fc-epsilon_receptor_signaling_pathway	0	0	1	1			autonomic_nervous_system_neoplasm	3	Fc-epsilon_receptor_signaling_pathway	3	0	1	1		autonomic_nervous_system_neoplasm	0	Fc-epsilon_receptor_signaling_pathway	2	0	1	1		autonomic_nervous_system_neoplasm
autonomic_nervous_system_neoplasm	0	Fc-gamma_receptor_signaling_pathway_invo...	0	0	1	1		autonomic_nervous_system_neoplasm	0	Fc-gamma_receptor_signaling_pathway_invo...	0	0	1	1		autonomic_nervous_system_neoplasm	5	Fc-gamma_receptor_signaling_pathway_invo...	4	1	1	1		autonomic_nervous_system_neoplasm	0	Fc-gamma_receptor_signaling_pathway_invo...	1	0	1	1			autonomic_nervous_system_neoplasm	3	Fc-gamma_receptor_signaling_pathway_invo...	4	0	1	1		autonomic_nervous_system_neoplasm	0	Fc-gamma_receptor_signaling_pathway_invo...	1	0	1	1		autonomic_nervous_system_neoplasm
autonomic_nervous_system_neoplasm	0	negative_regulation_of_epidermal_growth_...	0	0	1	1		autonomic_nervous_system_neoplasm	0	negative_regulation_of_epidermal_growth_...	0	0	1	1		autonomic_nervous_system_neoplasm	5	negative_regulation_of_epidermal_growth_...	2	0	1	1		autonomic_nervous_system_neoplasm	0	negative_regulation_of_epidermal_growth_...	0	0	1	1			autonomic_nervous_system_neoplasm	3	negative_regulation_of_epidermal_growth_...	2	0	1	1		autonomic_nervous_system_neoplasm	0	negative_regulation_of_epidermal_growth_...	2	0	1	1		autonomic_nervous_system_neoplasm
autonomic_nervous_system_neoplasm	0	negative_regulation_of_apoptotic_process	0	0	1	1		autonomic_nervous_system_neoplasm	0	negative_regulation_of_apoptotic_process	0	0	1	1		autonomic_nervous_system_neoplasm	5	negative_regulation_of_apoptotic_process	5	2	1	1		autonomic_nervous_system_neoplasm	0	negative_regulation_of_apoptotic_process	1	0	1	1			autonomic_nervous_system_neoplasm	3	negative_regulation_of_apoptotic_process	5	2	1	1		autonomic_nervous_system_neoplasm	0	negative_regulation_of_apoptotic_process	1	0	1	1		autonomic_nervous_system_neoplasm
autonomic_nervous_system_neoplasm	0	innate_immune_response	1	0	1	1		autonomic_nervous_system_neoplasm	0	innate_immune_response	1	0	1	1		autonomic_nervous_system_neoplasm	5	innate_immune_response	16	3	0.00366537	1		autonomic_nervous_system_neoplasm	0	innate_immune_response	2	0	1	1			autonomic_nervous_system_neoplasm	3	innate_immune_response	9	1	1	1		autonomic_nervous_system_neoplasm	0	innate_immune_response	2	0	1	1		autonomic_nervous_system_neoplasm
autonomic_nervous_system_neoplasm	0	positive_regulation_of_RNA_polymerase_II...	0	0	1	1		autonomic_nervous_system_neoplasm	0	positive_regulation_of_RNA_polymerase_II...	0	0	1	1		autonomic_nervous_system_neoplasm	5	positive_regulation_of_RNA_polymerase_II...	0	0	1	1		autonomic_nervous_system_neoplasm	0	positive_regulation_of_RNA_polymerase_II...	0	0	1	1			autonomic_nervous_system_neoplasm	3	positive_regulation_of_RNA_polymerase_II...	0	0	1	1		autonomic_nervous_system_neoplasm	0	positive_regulation_of_RNA_polymerase_II...	0	0	1	1		autonomic_nervous_system_neoplasm
autonomic_nervous_system_neoplasm	0	GMP_metabolic_process	0	0	1	1		autonomic_nervous_system_neoplasm	0	GMP_metabolic_process	0	0	1	1		autonomic_nervous_system_neoplasm	5	GMP_metabolic_process	4	0	1	1		autonomic_nervous_system_neoplasm	0	GMP_metabolic_process	0	0	1	1			autonomic_nervous_system_neoplasm	3	GMP_metabolic_process	1	0	1	1		autonomic_nervous_system_neoplasm	0	GMP_metabolic_process	0	0	1	1		autonomic_nervous_system_neoplasm
autonomic_nervous_system_neoplasm	0	GDP_metabolic_process	0	0	1	1		autonomic_nervous_system_neoplasm	0	GDP_metabolic_process	0	0	1	1		autonomic_nervous_system_neoplasm	5	GDP_metabolic_process	4	0	1	1		autonomic_nervous_system_neoplasm	0	GDP_metabolic_process	0	0	1	1			autonomic_nervous_system_neoplasm	3	GDP_metabolic_process	1	0	1	1		autonomic_nervous_system_neoplasm	0	GDP_metabolic_process	0	0	1	1		autonomic_nervous_system_neoplasm
autonomic_nervous_system_neoplasm	0	vascular_endothelial_growth_factor_recep...	0	0	1	1		autonomic_nervous_system_neoplasm	0	vascular_endothelial_growth_factor_recep...	1	0	1	1		autonomic_nervous_system_neoplasm	5	vascular_endothelial_growth_factor_recep...	14	1	1	1		autonomic_nervous_system_neoplasm	0	vascular_endothelial_growth_factor_recep...	0	0	1	1			autonomic_nervous_system_neoplasm	3	vascular_endothelial_growth_factor_recep...	6	0	1	1		autonomic_nervous_system_neoplasm	0	vascular_endothelial_growth_factor_recep...	2	0	1	1		autonomic_nervous_system_neoplasm
autonomic_nervous_system_neoplasm	0	neurotrophin_TRK_receptor_signaling_path...	0	0	1	1		autonomic_nervous_system_neoplasm	0	neurotrophin_TRK_receptor_signaling_path...	1	0	1	1		autonomic_nervous_system_neoplasm	5	neurotrophin_TRK_receptor_signaling_path...	10	1	1	1		autonomic_nervous_system_neoplasm	0	neurotrophin_TRK_receptor_signaling_path...	0	0	1	1			autonomic_nervous_system_neoplasm	3	neurotrophin_TRK_receptor_signaling_path...	5	1	1	1		autonomic_nervous_system_neoplasm	0	neurotrophin_TRK_receptor_signaling_path...	2	0	1	1		autonomic_nervous_system_neoplasm
autonomic_nervous_system_neoplasm	0	ephrin_receptor_signaling_pathway	0	0	1	1		autonomic_nervous_system_neoplasm	0	ephrin_receptor_signaling_pathway	0	0	1	1		autonomic_nervous_system_neoplasm	5	ephrin_receptor_signaling_pathway	9	1	1	1		autonomic_nervous_system_neoplasm	0	ephrin_receptor_signaling_pathway	1	0	1	1			autonomic_nervous_system_neoplasm	3	ephrin_receptor_signaling_pathway	6	0	1	1		autonomic_nervous_system_neoplasm	0	ephrin_receptor_signaling_pathway	0	0	1	1		autonomic_nervous_system_neoplasm
autonomic_nervous_system_neoplasm	0	regulation_of_synaptic_plasticity	0	0	1	1		autonomic_nervous_system_neoplasm	0	regulation_of_synaptic_plasticity	0	0	1	1		autonomic_nervous_system_neoplasm	5	regulation_of_synaptic_plasticity	13	0	1	1		autonomic_nervous_system_neoplasm	0	regulation_of_synaptic_plasticity	1	0	1	1			autonomic_nervous_system_neoplasm	3	regulation_of_synaptic_plasticity	1	0	1	1		autonomic_nervous_system_neoplasm	0	regulation_of_synaptic_plasticity	0	0	1	1		autonomic_nervous_system_neoplasm
autonomic_nervous_system_neoplasm	0	neuromuscular_process_controlling_balanc...	0	0	1	1		autonomic_nervous_system_neoplasm	0	neuromuscular_process_controlling_balanc...	0	0	1	1		autonomic_nervous_system_neoplasm	5	neuromuscular_process_controlling_balanc...	5	0	1	1		autonomic_nervous_system_neoplasm	0	neuromuscular_process_controlling_balanc...	0	0	1	1			autonomic_nervous_system_neoplasm	3	neuromuscular_process_controlling_balanc...	0	0	1	1		autonomic_nervous_system_neoplasm	0	neuromuscular_process_controlling_balanc...	0	0	1	1		autonomic_nervous_system_neoplasm
autonomic_nervous_system_neoplasm	0	actin_filament_bundle_assembly	0	0	1	1		autonomic_nervous_system_neoplasm	0	actin_filament_bundle_assembly	0	0	1	1		autonomic_nervous_system_neoplasm	5	actin_filament_bundle_assembly	7	0	1	1		autonomic_nervous_system_neoplasm	0	actin_filament_bundle_assembly	1	0	1	1			autonomic_nervous_system_neoplasm	3	actin_filament_bundle_assembly	3	0	1	1		autonomic_nervous_system_neoplasm	0	actin_filament_bundle_assembly	0	0	1	1		autonomic_nervous_system_neoplasm
autonomic_nervous_system_neoplasm	0	'de_novo'_posttranslational_protein_fold...	0	0	1	1		autonomic_nervous_system_neoplasm	0	'de_novo'_posttranslational_protein_fold...	0	0	1	1		autonomic_nervous_system_neoplasm	5	'de_novo'_posttranslational_protein_fold...	1	0	1	1		autonomic_nervous_system_neoplasm	0	'de_novo'_posttranslational_protein_fold...	0	0	1	1			autonomic_nervous_system_neoplasm	3	'de_novo'_posttranslational_protein_fold...	2	0	1	1		autonomic_nervous_system_neoplasm	0	'de_novo'_posttranslational_protein_fold...	1	0	1	1		autonomic_nervous_system_neoplasm
autonomic_nervous_system_neoplasm	0	negative_regulation_of_ubiquitin-protein...	0	0	1	1		autonomic_nervous_system_neoplasm	0	negative_regulation_of_ubiquitin-protein...	0	0	1	1		autonomic_nervous_system_neoplasm	5	negative_regulation_of_ubiquitin-protein...	0	0	1	1		autonomic_nervous_system_neoplasm	0	negative_regulation_of_ubiquitin-protein...	0	0	1	1			autonomic_nervous_system_neoplasm	3	negative_regulation_of_ubiquitin-protein...	0	0	1	1		autonomic_nervous_system_neoplasm	0	negative_regulation_of_ubiquitin-protein...	1	0	1	1		autonomic_nervous_system_neoplasm
autonomic_nervous_system_neoplasm	0	positive_regulation_of_ubiquitin-protein...	0	0	1	1		autonomic_nervous_system_neoplasm	0	positive_regulation_of_ubiquitin-protein...	0	0	1	1		autonomic_nervous_system_neoplasm	5	positive_regulation_of_ubiquitin-protein...	0	0	1	1		autonomic_nervous_system_neoplasm	0	positive_regulation_of_ubiquitin-protein...	0	0	1	1			autonomic_nervous_system_neoplasm	3	positive_regulation_of_ubiquitin-protein...	0	0	1	1		autonomic_nervous_system_neoplasm	0	positive_regulation_of_ubiquitin-protein...	1	0	1	1		autonomic_nervous_system_neoplasm
autonomic_nervous_system_neoplasm	0	actin_filament_capping	0	0	1	1		autonomic_nervous_system_neoplasm	0	actin_filament_capping	1	0	1	1		autonomic_nervous_system_neoplasm	5	actin_filament_capping	6	0	1	1		autonomic_nervous_system_neoplasm	0	actin_filament_capping	1	0	1	1			autonomic_nervous_system_neoplasm	3	actin_filament_capping	0	0	1	1		autonomic_nervous_system_neoplasm	0	actin_filament_capping	0	0	1	1		autonomic_nervous_system_neoplasm
autonomic_nervous_system_neoplasm	0	vocalization_behavior	0	0	1	1		autonomic_nervous_system_neoplasm	0	vocalization_behavior	0	0	1	1		autonomic_nervous_system_neoplasm	5	vocalization_behavior	6	0	1	1		autonomic_nervous_system_neoplasm	0	vocalization_behavior	0	0	1	1			autonomic_nervous_system_neoplasm	3	vocalization_behavior	0	0	1	1		autonomic_nervous_system_neoplasm	0	vocalization_behavior	0	0	1	1		autonomic_nervous_system_neoplasm
autonomic_nervous_system_neoplasm	0	negative_regulation_of_canonical_Wnt_sig...	0	0	1	1		autonomic_nervous_system_neoplasm	0	negative_regulation_of_canonical_Wnt_sig...	0	0	1	1		autonomic_nervous_system_neoplasm	5	negative_regulation_of_canonical_Wnt_sig...	3	1	1	1		autonomic_nervous_system_neoplasm	0	negative_regulation_of_canonical_Wnt_sig...	0	0	1	1			autonomic_nervous_system_neoplasm	3	negative_regulation_of_canonical_Wnt_sig...	1	0	1	1		autonomic_nervous_system_neoplasm	0	negative_regulation_of_canonical_Wnt_sig...	1	0	1	1		autonomic_nervous_system_neoplasm
autonomic_nervous_system_neoplasm	0	positive_regulation_of_canonical_Wnt_sig...	0	0	1	1		autonomic_nervous_system_neoplasm	0	positive_regulation_of_canonical_Wnt_sig...	0	0	1	1		autonomic_nervous_system_neoplasm	5	positive_regulation_of_canonical_Wnt_sig...	2	1	1	1		autonomic_nervous_system_neoplasm	0	positive_regulation_of_canonical_Wnt_sig...	0	0	1	1			autonomic_nervous_system_neoplasm	3	positive_regulation_of_canonical_Wnt_sig...	0	0	1	1		autonomic_nervous_system_neoplasm	0	positive_regulation_of_canonical_Wnt_sig...	1	0	1	1		autonomic_nervous_system_neoplasm
autonomic_nervous_system_neoplasm	0	intrinsic_apoptotic_signaling_pathway	0	0	1	1		autonomic_nervous_system_neoplasm	0	intrinsic_apoptotic_signaling_pathway	0	0	1	1		autonomic_nervous_system_neoplasm	5	intrinsic_apoptotic_signaling_pathway	3	1	1	1		autonomic_nervous_system_neoplasm	0	intrinsic_apoptotic_signaling_pathway	0	0	1	1			autonomic_nervous_system_neoplasm	3	intrinsic_apoptotic_signaling_pathway	2	0	1	1		autonomic_nervous_system_neoplasm	0	intrinsic_apoptotic_signaling_pathway	0	0	1	1		autonomic_nervous_system_neoplasm
autonomic_nervous_system_neoplasm	0	toxin_transport	0	0	1	1		autonomic_nervous_system_neoplasm	0	toxin_transport	0	0	1	1		autonomic_nervous_system_neoplasm	5	toxin_transport	0	0	1	1		autonomic_nervous_system_neoplasm	0	toxin_transport	0	0	1	1			autonomic_nervous_system_neoplasm	3	toxin_transport	1	1	1	1		autonomic_nervous_system_neoplasm	0	toxin_transport	0	0	1	1		autonomic_nervous_system_neoplasm
autonomic_nervous_system_neoplasm	0	positive_regulation_of_excitatory_postsy...	0	0	1	1		autonomic_nervous_system_neoplasm	0	positive_regulation_of_excitatory_postsy...	0	0	1	1		autonomic_nervous_system_neoplasm	5	positive_regulation_of_excitatory_postsy...	8	0	1	1		autonomic_nervous_system_neoplasm	0	positive_regulation_of_excitatory_postsy...	0	0	1	1			autonomic_nervous_system_neoplasm	3	positive_regulation_of_excitatory_postsy...	0	0	1	1		autonomic_nervous_system_neoplasm	0	positive_regulation_of_excitatory_postsy...	0	0	1	1		autonomic_nervous_system_neoplasm
malignant_glioma	0	G2/M_transition_of_mitotic_cell_cycle	0	0	1	1		malignant_glioma	0	G2/M_transition_of_mitotic_cell_cycle	0	0	1	1		malignant_glioma	8	G2/M_transition_of_mitotic_cell_cycle	0	0	1	1		malignant_glioma	1	G2/M_transition_of_mitotic_cell_cycle	0	0	1	1			malignant_glioma	10	G2/M_transition_of_mitotic_cell_cycle	2	0	1	1		malignant_glioma	1	G2/M_transition_of_mitotic_cell_cycle	1	0	1	1		malignant_glioma
malignant_glioma	0	nuclear-transcribed_mRNA_catabolic_proce...	0	0	1	1		malignant_glioma	0	nuclear-transcribed_mRNA_catabolic_proce...	0	0	1	1		malignant_glioma	8	nuclear-transcribed_mRNA_catabolic_proce...	0	0	1	1		malignant_glioma	1	nuclear-transcribed_mRNA_catabolic_proce...	0	0	1	1			malignant_glioma	10	nuclear-transcribed_mRNA_catabolic_proce...	1	0	1	1		malignant_glioma	1	nuclear-transcribed_mRNA_catabolic_proce...	0	0	1	1		malignant_glioma
malignant_glioma	0	activation_of_MAPKK_activity	0	0	1	1		malignant_glioma	0	activation_of_MAPKK_activity	1	0	1	1		malignant_glioma	8	activation_of_MAPKK_activity	10	0	1	1		malignant_glioma	1	activation_of_MAPKK_activity	0	0	1	1			malignant_glioma	10	activation_of_MAPKK_activity	3	1	1	1		malignant_glioma	1	activation_of_MAPKK_activity	2	0	1	1		malignant_glioma
malignant_glioma	0	protein_polyubiquitination	0	0	1	1		malignant_glioma	0	protein_polyubiquitination	0	0	1	1		malignant_glioma	8	protein_polyubiquitination	0	0	1	1		malignant_glioma	1	protein_polyubiquitination	0	0	1	1			malignant_glioma	10	protein_polyubiquitination	0	0	1	1		malignant_glioma	1	protein_polyubiquitination	1	0	1	1		malignant_glioma
malignant_glioma	0	stimulatory_C-type_lectin_receptor_signa...	0	0	1	1		malignant_glioma	0	stimulatory_C-type_lectin_receptor_signa...	0	0	1	1		malignant_glioma	8	stimulatory_C-type_lectin_receptor_signa...	1	0	1	1		malignant_glioma	1	stimulatory_C-type_lectin_receptor_signa...	0	0	1	1			malignant_glioma	10	stimulatory_C-type_lectin_receptor_signa...	2	1	1	1		malignant_glioma	1	stimulatory_C-type_lectin_receptor_signa...	1	0	1	1		malignant_glioma
malignant_glioma	0	antigen_processing_and_presentation_of_e...	0	0	1	1		malignant_glioma	0	antigen_processing_and_presentation_of_e...	0	0	1	1		malignant_glioma	8	antigen_processing_and_presentation_of_e...	0	0	1	1		malignant_glioma	1	antigen_processing_and_presentation_of_e...	0	0	1	1			malignant_glioma	10	antigen_processing_and_presentation_of_e...	0	0	1	1		malignant_glioma	1	antigen_processing_and_presentation_of_e...	1	0	1	1		malignant_glioma
malignant_glioma	0	translational_initiation	0	0	1	1		malignant_glioma	0	translational_initiation	0	0	1	1		malignant_glioma	8	translational_initiation	1	0	1	1		malignant_glioma	1	translational_initiation	1	0	1	1			malignant_glioma	10	translational_initiation	2	0	1	1		malignant_glioma	1	translational_initiation	0	0	1	1		malignant_glioma
malignant_glioma	0	regulation_of_cellular_amino_acid_metabo...	0	0	1	1		malignant_glioma	0	regulation_of_cellular_amino_acid_metabo...	0	0	1	1		malignant_glioma	8	regulation_of_cellular_amino_acid_metabo...	0	0	1	1		malignant_glioma	1	regulation_of_cellular_amino_acid_metabo...	0	0	1	1			malignant_glioma	10	regulation_of_cellular_amino_acid_metabo...	0	0	1	1		malignant_glioma	1	regulation_of_cellular_amino_acid_metabo...	0	0	1	1		malignant_glioma
malignant_glioma	0	SRP-dependent_cotranslational_protein_ta...	0	0	1	1		malignant_glioma	0	SRP-dependent_cotranslational_protein_ta...	0	0	1	1		malignant_glioma	8	SRP-dependent_cotranslational_protein_ta...	0	0	1	1		malignant_glioma	1	SRP-dependent_cotranslational_protein_ta...	0	0	1	1			malignant_glioma	10	SRP-dependent_cotranslational_protein_ta...	0	0	1	1		malignant_glioma	1	SRP-dependent_cotranslational_protein_ta...	0	0	1	1		malignant_glioma
malignant_glioma	0	DNA_damage_response,_signal_transduction...	0	0	1	1		malignant_glioma	0	DNA_damage_response,_signal_transduction...	0	0	1	1		malignant_glioma	8	DNA_damage_response,_signal_transduction...	0	0	1	1		malignant_glioma	1	DNA_damage_response,_signal_transduction...	0	0	1	1			malignant_glioma	10	DNA_damage_response,_signal_transduction...	0	0	1	1		malignant_glioma	1	DNA_damage_response,_signal_transduction...	1	0	1	1		malignant_glioma
malignant_glioma	0	epidermal_growth_factor_receptor_signali...	1	0	1	1		malignant_glioma	0	epidermal_growth_factor_receptor_signali...	1	0	1	1		malignant_glioma	8	epidermal_growth_factor_receptor_signali...	12	1	1	1		malignant_glioma	1	epidermal_growth_factor_receptor_signali...	0	0	1	1			malignant_glioma	10	epidermal_growth_factor_receptor_signali...	4	2	1	1		malignant_glioma	1	epidermal_growth_factor_receptor_signali...	2	0	1	1		malignant_glioma
malignant_glioma	0	small_GTPase_mediated_signal_transductio...	0	0	1	1		malignant_glioma	0	small_GTPase_mediated_signal_transductio...	1	0	1	1		malignant_glioma	8	small_GTPase_mediated_signal_transductio...	19	3	0.0265862	1		malignant_glioma	1	small_GTPase_mediated_signal_transductio...	1	0	1	1			malignant_glioma	10	small_GTPase_mediated_signal_transductio...	11	5	2.58e-06	0.00974487	*	malignant_glioma	1	small_GTPase_mediated_signal_transductio...	2	0	1	1		malignant_glioma
malignant_glioma	0	Ras_protein_signal_transduction	0	0	1	1		malignant_glioma	0	Ras_protein_signal_transduction	1	0	1	1		malignant_glioma	8	Ras_protein_signal_transduction	12	2	1	1		malignant_glioma	1	Ras_protein_signal_transduction	0	0	1	1			malignant_glioma	10	Ras_protein_signal_transduction	6	5	3.61e-08	0.00054541	***	malignant_glioma	1	Ras_protein_signal_transduction	2	0	1	1		malignant_glioma
malignant_glioma	0	synaptic_transmission	0	0	1	1		malignant_glioma	0	synaptic_transmission	0	0	1	1		malignant_glioma	8	synaptic_transmission	27	2	1	1		malignant_glioma	1	synaptic_transmission	1	1	1	1			malignant_glioma	10	synaptic_transmission	4	1	1	1		malignant_glioma	1	synaptic_transmission	1	1	1	1		malignant_glioma
malignant_glioma	0	neurotransmitter_secretion	0	0	1	1		malignant_glioma	0	neurotransmitter_secretion	0	0	1	1		malignant_glioma	8	neurotransmitter_secretion	6	0	1	1		malignant_glioma	1	neurotransmitter_secretion	0	0	1	1			malignant_glioma	10	neurotransmitter_secretion	1	0	1	1		malignant_glioma	1	neurotransmitter_secretion	1	1	1	1		malignant_glioma
malignant_glioma	0	axon_guidance	0	0	1	1		malignant_glioma	0	axon_guidance	1	0	1	1		malignant_glioma	8	axon_guidance	19	1	1	1		malignant_glioma	1	axon_guidance	1	0	1	1			malignant_glioma	10	axon_guidance	9	4	4.03e-05	0.056203		malignant_glioma	1	axon_guidance	3	1	1	1		malignant_glioma
malignant_glioma	0	synapse_assembly	0	0	1	1		malignant_glioma	0	synapse_assembly	0	0	1	1		malignant_glioma	8	synapse_assembly	9	1	1	1		malignant_glioma	1	synapse_assembly	0	0	1	1			malignant_glioma	10	synapse_assembly	1	0	1	1		malignant_glioma	1	synapse_assembly	0	0	1	1		malignant_glioma
malignant_glioma	0	insulin_receptor_signaling_pathway	0	0	1	1		malignant_glioma	0	insulin_receptor_signaling_pathway	1	0	1	1		malignant_glioma	8	insulin_receptor_signaling_pathway	10	0	1	1		malignant_glioma	1	insulin_receptor_signaling_pathway	0	0	1	1			malignant_glioma	10	insulin_receptor_signaling_pathway	2	1	1	1		malignant_glioma	1	insulin_receptor_signaling_pathway	2	0	1	1		malignant_glioma
malignant_glioma	0	fibroblast_growth_factor_receptor_signal...	0	0	1	1		malignant_glioma	0	fibroblast_growth_factor_receptor_signal...	1	0	1	1		malignant_glioma	8	fibroblast_growth_factor_receptor_signal...	10	1	1	1		malignant_glioma	1	fibroblast_growth_factor_receptor_signal...	0	0	1	1			malignant_glioma	10	fibroblast_growth_factor_receptor_signal...	3	1	1	1		malignant_glioma	1	fibroblast_growth_factor_receptor_signal...	2	0	1	1		malignant_glioma
malignant_glioma	0	proteasomal_ubiquitin-independent_protei...	0	0	1	1		malignant_glioma	0	proteasomal_ubiquitin-independent_protei...	0	0	1	1		malignant_glioma	8	proteasomal_ubiquitin-independent_protei...	0	0	1	1		malignant_glioma	1	proteasomal_ubiquitin-independent_protei...	0	0	1	1			malignant_glioma	10	proteasomal_ubiquitin-independent_protei...	0	0	1	1		malignant_glioma	1	proteasomal_ubiquitin-independent_protei...	0	0	1	1		malignant_glioma
malignant_glioma	0	viral_process	0	0	1	1		malignant_glioma	0	viral_process	0	0	1	1		malignant_glioma	8	viral_process	1	0	1	1		malignant_glioma	1	viral_process	0	0	1	1			malignant_glioma	10	viral_process	4	2	1	1		malignant_glioma	1	viral_process	3	1	1	1		malignant_glioma
malignant_glioma	0	substantia_nigra_development	0	0	1	1		malignant_glioma	0	substantia_nigra_development	0	0	1	1		malignant_glioma	8	substantia_nigra_development	1	0	1	1		malignant_glioma	1	substantia_nigra_development	0	0	1	1			malignant_glioma	10	substantia_nigra_development	5	1	1	1		malignant_glioma	1	substantia_nigra_development	0	0	1	1		malignant_glioma
malignant_glioma	0	platelet_activation	0	0	1	1		malignant_glioma	0	platelet_activation	0	0	1	1		malignant_glioma	8	platelet_activation	5	2	1	1		malignant_glioma	1	platelet_activation	0	0	1	1			malignant_glioma	10	platelet_activation	7	3	0.000555455	0.393375		malignant_glioma	1	platelet_activation	1	0	1	1		malignant_glioma
malignant_glioma	0	anaphase-promoting_complex-dependent_pro...	0	0	1	1		malignant_glioma	0	anaphase-promoting_complex-dependent_pro...	0	0	1	1		malignant_glioma	8	anaphase-promoting_complex-dependent_pro...	0	0	1	1		malignant_glioma	1	anaphase-promoting_complex-dependent_pro...	0	0	1	1			malignant_glioma	10	anaphase-promoting_complex-dependent_pro...	1	1	1	1		malignant_glioma	1	anaphase-promoting_complex-dependent_pro...	1	0	1	1		malignant_glioma
malignant_glioma	0	tumor_necrosis_factor-mediated_signaling...	0	0	1	1		malignant_glioma	0	tumor_necrosis_factor-mediated_signaling...	0	0	1	1		malignant_glioma	8	tumor_necrosis_factor-mediated_signaling...	1	0	1	1		malignant_glioma	1	tumor_necrosis_factor-mediated_signaling...	0	0	1	1			malignant_glioma	10	tumor_necrosis_factor-mediated_signaling...	0	0	1	1		malignant_glioma	1	tumor_necrosis_factor-mediated_signaling...	1	0	1	1		malignant_glioma
malignant_glioma	0	cell_junction_assembly	0	0	1	1		malignant_glioma	0	cell_junction_assembly	0	0	1	1		malignant_glioma	8	cell_junction_assembly	14	6	9.1e-07	0.00458286	**	malignant_glioma	1	cell_junction_assembly	0	0	1	1			malignant_glioma	10	cell_junction_assembly	6	3	0.000324035	0.256791		malignant_glioma	1	cell_junction_assembly	0	0	1	1		malignant_glioma
malignant_glioma	0	adherens_junction_organization	0	0	1	1		malignant_glioma	0	adherens_junction_organization	0	0	1	1		malignant_glioma	8	adherens_junction_organization	10	5	5.02e-06	0.0138997	*	malignant_glioma	1	adherens_junction_organization	0	0	1	1			malignant_glioma	10	adherens_junction_organization	6	2	1	1		malignant_glioma	1	adherens_junction_organization	0	0	1	1		malignant_glioma
malignant_glioma	0	social_behavior	0	0	1	1		malignant_glioma	0	social_behavior	0	0	1	1		malignant_glioma	8	social_behavior	7	0	1	1		malignant_glioma	1	social_behavior	0	0	1	1			malignant_glioma	10	social_behavior	1	1	1	1		malignant_glioma	1	social_behavior	0	0	1	1		malignant_glioma
malignant_glioma	0	NIK/NF-kappaB_signaling	0	0	1	1		malignant_glioma	0	NIK/NF-kappaB_signaling	0	0	1	1		malignant_glioma	8	NIK/NF-kappaB_signaling	1	1	1	1		malignant_glioma	1	NIK/NF-kappaB_signaling	0	0	1	1			malignant_glioma	10	NIK/NF-kappaB_signaling	0	0	1	1		malignant_glioma	1	NIK/NF-kappaB_signaling	1	0	1	1		malignant_glioma
malignant_glioma	0	Fc-epsilon_receptor_signaling_pathway	0	0	1	1		malignant_glioma	0	Fc-epsilon_receptor_signaling_pathway	1	0	1	1		malignant_glioma	8	Fc-epsilon_receptor_signaling_pathway	9	0	1	1		malignant_glioma	1	Fc-epsilon_receptor_signaling_pathway	0	0	1	1			malignant_glioma	10	Fc-epsilon_receptor_signaling_pathway	3	2	1	1		malignant_glioma	1	Fc-epsilon_receptor_signaling_pathway	2	0	1	1		malignant_glioma
malignant_glioma	0	Fc-gamma_receptor_signaling_pathway_invo...	0	0	1	1		malignant_glioma	0	Fc-gamma_receptor_signaling_pathway_invo...	0	0	1	1		malignant_glioma	8	Fc-gamma_receptor_signaling_pathway_invo...	4	0	1	1		malignant_glioma	1	Fc-gamma_receptor_signaling_pathway_invo...	1	0	1	1			malignant_glioma	10	Fc-gamma_receptor_signaling_pathway_invo...	4	1	1	1		malignant_glioma	1	Fc-gamma_receptor_signaling_pathway_invo...	1	0	1	1		malignant_glioma
malignant_glioma	0	negative_regulation_of_epidermal_growth_...	0	0	1	1		malignant_glioma	0	negative_regulation_of_epidermal_growth_...	0	0	1	1		malignant_glioma	8	negative_regulation_of_epidermal_growth_...	2	1	1	1		malignant_glioma	1	negative_regulation_of_epidermal_growth_...	0	0	1	1			malignant_glioma	10	negative_regulation_of_epidermal_growth_...	2	1	1	1		malignant_glioma	1	negative_regulation_of_epidermal_growth_...	2	0	1	1		malignant_glioma
malignant_glioma	0	negative_regulation_of_apoptotic_process	0	0	1	1		malignant_glioma	0	negative_regulation_of_apoptotic_process	0	0	1	1		malignant_glioma	8	negative_regulation_of_apoptotic_process	5	1	1	1		malignant_glioma	1	negative_regulation_of_apoptotic_process	1	0	1	1			malignant_glioma	10	negative_regulation_of_apoptotic_process	5	3	0.000165393	0.151443		malignant_glioma	1	negative_regulation_of_apoptotic_process	1	0	1	1		malignant_glioma
malignant_glioma	0	innate_immune_response	1	0	1	1		malignant_glioma	0	innate_immune_response	1	0	1	1		malignant_glioma	8	innate_immune_response	16	1	1	1		malignant_glioma	1	innate_immune_response	2	0	1	1			malignant_glioma	10	innate_immune_response	9	4	4.03e-05	0.056203		malignant_glioma	1	innate_immune_response	2	0	1	1		malignant_glioma
malignant_glioma	0	positive_regulation_of_RNA_polymerase_II...	0	0	1	1		malignant_glioma	0	positive_regulation_of_RNA_polymerase_II...	0	0	1	1		malignant_glioma	8	positive_regulation_of_RNA_polymerase_II...	0	0	1	1		malignant_glioma	1	positive_regulation_of_RNA_polymerase_II...	0	0	1	1			malignant_glioma	10	positive_regulation_of_RNA_polymerase_II...	0	0	1	1		malignant_glioma	1	positive_regulation_of_RNA_polymerase_II...	0	0	1	1		malignant_glioma
malignant_glioma	0	GMP_metabolic_process	0	0	1	1		malignant_glioma	0	GMP_metabolic_process	0	0	1	1		malignant_glioma	8	GMP_metabolic_process	4	0	1	1		malignant_glioma	1	GMP_metabolic_process	0	0	1	1			malignant_glioma	10	GMP_metabolic_process	1	0	1	1		malignant_glioma	1	GMP_metabolic_process	0	0	1	1		malignant_glioma
malignant_glioma	0	GDP_metabolic_process	0	0	1	1		malignant_glioma	0	GDP_metabolic_process	0	0	1	1		malignant_glioma	8	GDP_metabolic_process	4	0	1	1		malignant_glioma	1	GDP_metabolic_process	0	0	1	1			malignant_glioma	10	GDP_metabolic_process	1	0	1	1		malignant_glioma	1	GDP_metabolic_process	0	0	1	1		malignant_glioma
malignant_glioma	0	vascular_endothelial_growth_factor_recep...	0	0	1	1		malignant_glioma	0	vascular_endothelial_growth_factor_recep...	1	0	1	1		malignant_glioma	8	vascular_endothelial_growth_factor_recep...	14	1	1	1		malignant_glioma	1	vascular_endothelial_growth_factor_recep...	0	0	1	1			malignant_glioma	10	vascular_endothelial_growth_factor_recep...	6	2	1	1		malignant_glioma	1	vascular_endothelial_growth_factor_recep...	2	0	1	1		malignant_glioma
malignant_glioma	0	neurotrophin_TRK_receptor_signaling_path...	0	0	1	1		malignant_glioma	0	neurotrophin_TRK_receptor_signaling_path...	1	0	1	1		malignant_glioma	8	neurotrophin_TRK_receptor_signaling_path...	10	1	1	1		malignant_glioma	1	neurotrophin_TRK_receptor_signaling_path...	0	0	1	1			malignant_glioma	10	neurotrophin_TRK_receptor_signaling_path...	5	4	1.72e-06	0.00742466	*	malignant_glioma	1	neurotrophin_TRK_receptor_signaling_path...	2	0	1	1		malignant_glioma
malignant_glioma	0	ephrin_receptor_signaling_pathway	0	0	1	1		malignant_glioma	0	ephrin_receptor_signaling_pathway	0	0	1	1		malignant_glioma	8	ephrin_receptor_signaling_pathway	9	1	1	1		malignant_glioma	1	ephrin_receptor_signaling_pathway	1	0	1	1			malignant_glioma	10	ephrin_receptor_signaling_pathway	6	2	1	1		malignant_glioma	1	ephrin_receptor_signaling_pathway	0	0	1	1		malignant_glioma
malignant_glioma	0	regulation_of_synaptic_plasticity	0	0	1	1		malignant_glioma	0	regulation_of_synaptic_plasticity	0	0	1	1		malignant_glioma	8	regulation_of_synaptic_plasticity	13	1	1	1		malignant_glioma	1	regulation_of_synaptic_plasticity	1	1	1	1			malignant_glioma	10	regulation_of_synaptic_plasticity	1	0	1	1		malignant_glioma	1	regulation_of_synaptic_plasticity	0	0	1	1		malignant_glioma
malignant_glioma	0	neuromuscular_process_controlling_balanc...	0	0	1	1		malignant_glioma	0	neuromuscular_process_controlling_balanc...	0	0	1	1		malignant_glioma	8	neuromuscular_process_controlling_balanc...	5	0	1	1		malignant_glioma	1	neuromuscular_process_controlling_balanc...	0	0	1	1			malignant_glioma	10	neuromuscular_process_controlling_balanc...	0	0	1	1		malignant_glioma	1	neuromuscular_process_controlling_balanc...	0	0	1	1		malignant_glioma
malignant_glioma	0	actin_filament_bundle_assembly	0	0	1	1		malignant_glioma	0	actin_filament_bundle_assembly	0	0	1	1		malignant_glioma	8	actin_filament_bundle_assembly	7	2	1	1		malignant_glioma	1	actin_filament_bundle_assembly	1	0	1	1			malignant_glioma	10	actin_filament_bundle_assembly	3	1	1	1		malignant_glioma	1	actin_filament_bundle_assembly	0	0	1	1		malignant_glioma
malignant_glioma	0	'de_novo'_posttranslational_protein_fold...	0	0	1	1		malignant_glioma	0	'de_novo'_posttranslational_protein_fold...	0	0	1	1		malignant_glioma	8	'de_novo'_posttranslational_protein_fold...	1	0	1	1		malignant_glioma	1	'de_novo'_posttranslational_protein_fold...	0	0	1	1			malignant_glioma	10	'de_novo'_posttranslational_protein_fold...	2	0	1	1		malignant_glioma	1	'de_novo'_posttranslational_protein_fold...	1	1	1	1		malignant_glioma
malignant_glioma	0	negative_regulation_of_ubiquitin-protein...	0	0	1	1		malignant_glioma	0	negative_regulation_of_ubiquitin-protein...	0	0	1	1		malignant_glioma	8	negative_regulation_of_ubiquitin-protein...	0	0	1	1		malignant_glioma	1	negative_regulation_of_ubiquitin-protein...	0	0	1	1			malignant_glioma	10	negative_regulation_of_ubiquitin-protein...	0	0	1	1		malignant_glioma	1	negative_regulation_of_ubiquitin-protein...	1	0	1	1		malignant_glioma
malignant_glioma	0	positive_regulation_of_ubiquitin-protein...	0	0	1	1		malignant_glioma	0	positive_regulation_of_ubiquitin-protein...	0	0	1	1		malignant_glioma	8	positive_regulation_of_ubiquitin-protein...	0	0	1	1		malignant_glioma	1	positive_regulation_of_ubiquitin-protein...	0	0	1	1			malignant_glioma	10	positive_regulation_of_ubiquitin-protein...	0	0	1	1		malignant_glioma	1	positive_regulation_of_ubiquitin-protein...	1	0	1	1		malignant_glioma
malignant_glioma	0	actin_filament_capping	0	0	1	1		malignant_glioma	0	actin_filament_capping	1	0	1	1		malignant_glioma	8	actin_filament_capping	6	0	1	1		malignant_glioma	1	actin_filament_capping	1	0	1	1			malignant_glioma	10	actin_filament_capping	0	0	1	1		malignant_glioma	1	actin_filament_capping	0	0	1	1		malignant_glioma
malignant_glioma	0	vocalization_behavior	0	0	1	1		malignant_glioma	0	vocalization_behavior	0	0	1	1		malignant_glioma	8	vocalization_behavior	6	0	1	1		malignant_glioma	1	vocalization_behavior	0	0	1	1			malignant_glioma	10	vocalization_behavior	0	0	1	1		malignant_glioma	1	vocalization_behavior	0	0	1	1		malignant_glioma
malignant_glioma	0	negative_regulation_of_canonical_Wnt_sig...	0	0	1	1		malignant_glioma	0	negative_regulation_of_canonical_Wnt_sig...	0	0	1	1		malignant_glioma	8	negative_regulation_of_canonical_Wnt_sig...	3	1	1	1		malignant_glioma	1	negative_regulation_of_canonical_Wnt_sig...	0	0	1	1			malignant_glioma	10	negative_regulation_of_canonical_Wnt_sig...	1	0	1	1		malignant_glioma	1	negative_regulation_of_canonical_Wnt_sig...	1	0	1	1		malignant_glioma
malignant_glioma	0	positive_regulation_of_canonical_Wnt_sig...	0	0	1	1		malignant_glioma	0	positive_regulation_of_canonical_Wnt_sig...	0	0	1	1		malignant_glioma	8	positive_regulation_of_canonical_Wnt_sig...	2	2	1	1		malignant_glioma	1	positive_regulation_of_canonical_Wnt_sig...	0	0	1	1			malignant_glioma	10	positive_regulation_of_canonical_Wnt_sig...	0	0	1	1		malignant_glioma	1	positive_regulation_of_canonical_Wnt_sig...	1	0	1	1		malignant_glioma
malignant_glioma	0	intrinsic_apoptotic_signaling_pathway	0	0	1	1		malignant_glioma	0	intrinsic_apoptotic_signaling_pathway	0	0	1	1		malignant_glioma	8	intrinsic_apoptotic_signaling_pathway	3	0	1	1		malignant_glioma	1	intrinsic_apoptotic_signaling_pathway	0	0	1	1			malignant_glioma	10	intrinsic_apoptotic_signaling_pathway	2	0	1	1		malignant_glioma	1	intrinsic_apoptotic_signaling_pathway	0	0	1	1		malignant_glioma
malignant_glioma	0	toxin_transport	0	0	1	1		malignant_glioma	0	toxin_transport	0	0	1	1		malignant_glioma	8	toxin_transport	0	0	1	1		malignant_glioma	1	toxin_transport	0	0	1	1			malignant_glioma	10	toxin_transport	1	1	1	1		malignant_glioma	1	toxin_transport	0	0	1	1		malignant_glioma
malignant_glioma	0	positive_regulation_of_excitatory_postsy...	0	0	1	1		malignant_glioma	0	positive_regulation_of_excitatory_postsy...	0	0	1	1		malignant_glioma	8	positive_regulation_of_excitatory_postsy...	8	0	1	1		malignant_glioma	1	positive_regulation_of_excitatory_postsy...	0	0	1	1			malignant_glioma	10	positive_regulation_of_excitatory_postsy...	0	0	1	1		malignant_glioma	1	positive_regulation_of_excitatory_postsy...	0	0	1	1		malignant_glioma
nervous_system_cancer	0	G2/M_transition_of_mitotic_cell_cycle	0	0	1	1		nervous_system_cancer	0	G2/M_transition_of_mitotic_cell_cycle	0	0	1	1		nervous_system_cancer	9	G2/M_transition_of_mitotic_cell_cycle	0	0	1	1		nervous_system_cancer	1	G2/M_transition_of_mitotic_cell_cycle	0	0	1	1			nervous_system_cancer	8	G2/M_transition_of_mitotic_cell_cycle	2	0	1	1		nervous_system_cancer	0	G2/M_transition_of_mitotic_cell_cycle	1	0	1	1		nervous_system_cancer
nervous_system_cancer	0	nuclear-transcribed_mRNA_catabolic_proce...	0	0	1	1		nervous_system_cancer	0	nuclear-transcribed_mRNA_catabolic_proce...	0	0	1	1		nervous_system_cancer	9	nuclear-transcribed_mRNA_catabolic_proce...	0	0	1	1		nervous_system_cancer	1	nuclear-transcribed_mRNA_catabolic_proce...	0	0	1	1			nervous_system_cancer	8	nuclear-transcribed_mRNA_catabolic_proce...	1	0	1	1		nervous_system_cancer	0	nuclear-transcribed_mRNA_catabolic_proce...	0	0	1	1		nervous_system_cancer
nervous_system_cancer	0	activation_of_MAPKK_activity	0	0	1	1		nervous_system_cancer	0	activation_of_MAPKK_activity	1	0	1	1		nervous_system_cancer	9	activation_of_MAPKK_activity	10	1	1	1		nervous_system_cancer	1	activation_of_MAPKK_activity	0	0	1	1			nervous_system_cancer	8	activation_of_MAPKK_activity	3	0	1	1		nervous_system_cancer	0	activation_of_MAPKK_activity	2	0	1	1		nervous_system_cancer
nervous_system_cancer	0	protein_polyubiquitination	0	0	1	1		nervous_system_cancer	0	protein_polyubiquitination	0	0	1	1		nervous_system_cancer	9	protein_polyubiquitination	0	0	1	1		nervous_system_cancer	1	protein_polyubiquitination	0	0	1	1			nervous_system_cancer	8	protein_polyubiquitination	0	0	1	1		nervous_system_cancer	0	protein_polyubiquitination	1	0	1	1		nervous_system_cancer
nervous_system_cancer	0	stimulatory_C-type_lectin_receptor_signa...	0	0	1	1		nervous_system_cancer	0	stimulatory_C-type_lectin_receptor_signa...	0	0	1	1		nervous_system_cancer	9	stimulatory_C-type_lectin_receptor_signa...	1	1	1	1		nervous_system_cancer	1	stimulatory_C-type_lectin_receptor_signa...	0	0	1	1			nervous_system_cancer	8	stimulatory_C-type_lectin_receptor_signa...	2	0	1	1		nervous_system_cancer	0	stimulatory_C-type_lectin_receptor_signa...	1	0	1	1		nervous_system_cancer
nervous_system_cancer	0	antigen_processing_and_presentation_of_e...	0	0	1	1		nervous_system_cancer	0	antigen_processing_and_presentation_of_e...	0	0	1	1		nervous_system_cancer	9	antigen_processing_and_presentation_of_e...	0	0	1	1		nervous_system_cancer	1	antigen_processing_and_presentation_of_e...	0	0	1	1			nervous_system_cancer	8	antigen_processing_and_presentation_of_e...	0	0	1	1		nervous_system_cancer	0	antigen_processing_and_presentation_of_e...	1	0	1	1		nervous_system_cancer
nervous_system_cancer	0	translational_initiation	0	0	1	1		nervous_system_cancer	0	translational_initiation	0	0	1	1		nervous_system_cancer	9	translational_initiation	1	0	1	1		nervous_system_cancer	1	translational_initiation	1	1	1	1			nervous_system_cancer	8	translational_initiation	2	1	1	1		nervous_system_cancer	0	translational_initiation	0	0	1	1		nervous_system_cancer
nervous_system_cancer	0	regulation_of_cellular_amino_acid_metabo...	0	0	1	1		nervous_system_cancer	0	regulation_of_cellular_amino_acid_metabo...	0	0	1	1		nervous_system_cancer	9	regulation_of_cellular_amino_acid_metabo...	0	0	1	1		nervous_system_cancer	1	regulation_of_cellular_amino_acid_metabo...	0	0	1	1			nervous_system_cancer	8	regulation_of_cellular_amino_acid_metabo...	0	0	1	1		nervous_system_cancer	0	regulation_of_cellular_amino_acid_metabo...	0	0	1	1		nervous_system_cancer
nervous_system_cancer	0	SRP-dependent_cotranslational_protein_ta...	0	0	1	1		nervous_system_cancer	0	SRP-dependent_cotranslational_protein_ta...	0	0	1	1		nervous_system_cancer	9	SRP-dependent_cotranslational_protein_ta...	0	0	1	1		nervous_system_cancer	1	SRP-dependent_cotranslational_protein_ta...	0	0	1	1			nervous_system_cancer	8	SRP-dependent_cotranslational_protein_ta...	0	0	1	1		nervous_system_cancer	0	SRP-dependent_cotranslational_protein_ta...	0	0	1	1		nervous_system_cancer
nervous_system_cancer	0	DNA_damage_response,_signal_transduction...	0	0	1	1		nervous_system_cancer	0	DNA_damage_response,_signal_transduction...	0	0	1	1		nervous_system_cancer	9	DNA_damage_response,_signal_transduction...	0	0	1	1		nervous_system_cancer	1	DNA_damage_response,_signal_transduction...	0	0	1	1			nervous_system_cancer	8	DNA_damage_response,_signal_transduction...	0	0	1	1		nervous_system_cancer	0	DNA_damage_response,_signal_transduction...	1	0	1	1		nervous_system_cancer
nervous_system_cancer	0	epidermal_growth_factor_receptor_signali...	1	0	1	1		nervous_system_cancer	0	epidermal_growth_factor_receptor_signali...	1	0	1	1		nervous_system_cancer	9	epidermal_growth_factor_receptor_signali...	12	1	1	1		nervous_system_cancer	1	epidermal_growth_factor_receptor_signali...	0	0	1	1			nervous_system_cancer	8	epidermal_growth_factor_receptor_signali...	4	0	1	1		nervous_system_cancer	0	epidermal_growth_factor_receptor_signali...	2	0	1	1		nervous_system_cancer
nervous_system_cancer	0	small_GTPase_mediated_signal_transductio...	0	0	1	1		nervous_system_cancer	0	small_GTPase_mediated_signal_transductio...	1	0	1	1		nervous_system_cancer	9	small_GTPase_mediated_signal_transductio...	19	3	0.0365732	1		nervous_system_cancer	1	small_GTPase_mediated_signal_transductio...	1	0	1	1			nervous_system_cancer	8	small_GTPase_mediated_signal_transductio...	11	2	1	1		nervous_system_cancer	0	small_GTPase_mediated_signal_transductio...	2	0	1	1		nervous_system_cancer
nervous_system_cancer	0	Ras_protein_signal_transduction	0	0	1	1		nervous_system_cancer	0	Ras_protein_signal_transduction	1	0	1	1		nervous_system_cancer	9	Ras_protein_signal_transduction	12	2	1	1		nervous_system_cancer	1	Ras_protein_signal_transduction	0	0	1	1			nervous_system_cancer	8	Ras_protein_signal_transduction	6	1	1	1		nervous_system_cancer	0	Ras_protein_signal_transduction	2	0	1	1		nervous_system_cancer
nervous_system_cancer	0	synaptic_transmission	0	0	1	1		nervous_system_cancer	0	synaptic_transmission	0	0	1	1		nervous_system_cancer	9	synaptic_transmission	27	3	0.0839753	1		nervous_system_cancer	1	synaptic_transmission	1	0	1	1			nervous_system_cancer	8	synaptic_transmission	4	0	1	1		nervous_system_cancer	0	synaptic_transmission	1	0	1	1		nervous_system_cancer
nervous_system_cancer	0	neurotransmitter_secretion	0	0	1	1		nervous_system_cancer	0	neurotransmitter_secretion	0	0	1	1		nervous_system_cancer	9	neurotransmitter_secretion	6	0	1	1		nervous_system_cancer	1	neurotransmitter_secretion	0	0	1	1			nervous_system_cancer	8	neurotransmitter_secretion	1	0	1	1		nervous_system_cancer	0	neurotransmitter_secretion	1	0	1	1		nervous_system_cancer
nervous_system_cancer	0	axon_guidance	0	0	1	1		nervous_system_cancer	0	axon_guidance	1	0	1	1		nervous_system_cancer	9	axon_guidance	19	1	1	1		nervous_system_cancer	1	axon_guidance	1	0	1	1			nervous_system_cancer	8	axon_guidance	9	1	1	1		nervous_system_cancer	0	axon_guidance	3	0	1	1		nervous_system_cancer
nervous_system_cancer	0	synapse_assembly	0	0	1	1		nervous_system_cancer	0	synapse_assembly	0	0	1	1		nervous_system_cancer	9	synapse_assembly	9	0	1	1		nervous_system_cancer	1	synapse_assembly	0	0	1	1			nervous_system_cancer	8	synapse_assembly	1	0	1	1		nervous_system_cancer	0	synapse_assembly	0	0	1	1		nervous_system_cancer
nervous_system_cancer	0	insulin_receptor_signaling_pathway	0	0	1	1		nervous_system_cancer	0	insulin_receptor_signaling_pathway	1	0	1	1		nervous_system_cancer	9	insulin_receptor_signaling_pathway	10	1	1	1		nervous_system_cancer	1	insulin_receptor_signaling_pathway	0	0	1	1			nervous_system_cancer	8	insulin_receptor_signaling_pathway	2	0	1	1		nervous_system_cancer	0	insulin_receptor_signaling_pathway	2	0	1	1		nervous_system_cancer
nervous_system_cancer	0	fibroblast_growth_factor_receptor_signal...	0	0	1	1		nervous_system_cancer	0	fibroblast_growth_factor_receptor_signal...	1	0	1	1		nervous_system_cancer	9	fibroblast_growth_factor_receptor_signal...	10	2	1	1		nervous_system_cancer	1	fibroblast_growth_factor_receptor_signal...	0	0	1	1			nervous_system_cancer	8	fibroblast_growth_factor_receptor_signal...	3	0	1	1		nervous_system_cancer	0	fibroblast_growth_factor_receptor_signal...	2	0	1	1		nervous_system_cancer
nervous_system_cancer	0	proteasomal_ubiquitin-independent_protei...	0	0	1	1		nervous_system_cancer	0	proteasomal_ubiquitin-independent_protei...	0	0	1	1		nervous_system_cancer	9	proteasomal_ubiquitin-independent_protei...	0	0	1	1		nervous_system_cancer	1	proteasomal_ubiquitin-independent_protei...	0	0	1	1			nervous_system_cancer	8	proteasomal_ubiquitin-independent_protei...	0	0	1	1		nervous_system_cancer	0	proteasomal_ubiquitin-independent_protei...	0	0	1	1		nervous_system_cancer
nervous_system_cancer	0	viral_process	0	0	1	1		nervous_system_cancer	0	viral_process	0	0	1	1		nervous_system_cancer	9	viral_process	1	1	1	1		nervous_system_cancer	1	viral_process	0	0	1	1			nervous_system_cancer	8	viral_process	4	1	1	1		nervous_system_cancer	0	viral_process	3	0	1	1		nervous_system_cancer
nervous_system_cancer	0	substantia_nigra_development	0	0	1	1		nervous_system_cancer	0	substantia_nigra_development	0	0	1	1		nervous_system_cancer	9	substantia_nigra_development	1	0	1	1		nervous_system_cancer	1	substantia_nigra_development	0	0	1	1			nervous_system_cancer	8	substantia_nigra_development	5	2	1	1		nervous_system_cancer	0	substantia_nigra_development	0	0	1	1		nervous_system_cancer
nervous_system_cancer	0	platelet_activation	0	0	1	1		nervous_system_cancer	0	platelet_activation	0	0	1	1		nervous_system_cancer	9	platelet_activation	5	1	1	1		nervous_system_cancer	1	platelet_activation	0	0	1	1			nervous_system_cancer	8	platelet_activation	7	1	1	1		nervous_system_cancer	0	platelet_activation	1	0	1	1		nervous_system_cancer
nervous_system_cancer	0	anaphase-promoting_complex-dependent_pro...	0	0	1	1		nervous_system_cancer	0	anaphase-promoting_complex-dependent_pro...	0	0	1	1		nervous_system_cancer	9	anaphase-promoting_complex-dependent_pro...	0	0	1	1		nervous_system_cancer	1	anaphase-promoting_complex-dependent_pro...	0	0	1	1			nervous_system_cancer	8	anaphase-promoting_complex-dependent_pro...	1	1	1	1		nervous_system_cancer	0	anaphase-promoting_complex-dependent_pro...	1	0	1	1		nervous_system_cancer
[truncated: 506 more rows]
[truncated: 15 more columns]

## Sheet: P140Cap_synVCancer_HDOgroup2VGO
P140Cap_syn_PPI																																	P140Cap_Cancer_PPI
Region1								Region2								Region3								Region4									Region1								Region2								Region3
[truncated: 213 more rows]
[truncated: 15 more columns]

## Sheet: P140Cap_synVCancer_HDOgroup3VGO
P140Cap_syn_PPI																																	P140Cap_Cancer_PPI
Region1								Region2								Region3								Region4									Region1								Region2								Region3
[truncated: 160 more rows]
[truncated: 15 more columns]
