# Supplementary material for: Dissecting the Shared and Context-Dependent Pathways Mediated by the p140Cap Adaptor Protein in Cancer and in Neurons
Source: Front Cell Dev Biol. 2019 Oct 15;7:222. doi: 10.3389/fcell.2019.00222 (PMC6803390; doi:10.3389/fcell.2019.00222)
Supplement: TABLE S6 — Disease overlap for cancer and synaptic p140Cap networks. [file Table_6.XLSX]

## Sheet: P140Cap_Cancer_PPI_Disease_over
HDO.ID	Disease.long	Disease	N	HDO.ID	Disease.long	Disease	N	sAB	Separated	Overlap	zScore	pvalue	Separation/Overlap.than.chance	Bonferroni	q-value
DOID:10652	Alzheimer's_disease	AD	44	DOID:3093	Nervous_System_Cancer	NSC	42	-0.578652	.	YES	-3.73543	0.000187396	Smaller	.	0.000250329
DOID:10652	Alzheimer's_disease	AD	44	DOID:1612	Breast_Cancer	BC	104	-0.472311	.	YES	-3.47221	0.0005162	Smaller	.	0.000688404
DOID:10652	Alzheimer's_disease	AD	44	DOID:14330	Parkinson's_disease	PD	28	-0.483045	.	YES	-2.88275	0.00394225	Smaller	.	0.00458518
DOID:10652	Alzheimer's_disease	AD	44	DOID:1192	Peripheral_Nervous_System_Neoplasm	PNSN	17	-0.429429	.	YES	-2.75645	0.00584332	Smaller	.	0.00613305
DOID:10652	Alzheimer's_disease	AD	44	DOID:5419	Schizophrenia	SCH	54	-0.463581	.	YES	-2.62631	0.00863168	Smaller	.	0.00805641
DOID:10652	Alzheimer's_disease	AD	44	DOID:2621	Autonomic_Nervous_System_Neoplasm	ANSN	14	-0.383565	.	YES	-2.62094	0.00876864	Smaller	.	0.00805641
DOID:10652	Alzheimer's_disease	AD	44	DOID:1909	Melanoma	MEL	50	-0.477834	.	YES	-2.58749	0.00966768	Smaller	.	0.0104763
DOID:10652	Alzheimer's_disease	AD	44	DOID:769	NeuroBlastoma	NB	14	-0.383565	.	YES	-2.53955	0.0110994	Smaller	.	0.0104763
DOID:10652	Alzheimer's_disease	AD	44	DOID:5517	Stomach_Carcinoma	SCA	18	-0.382046	.	YES	-2.37837	0.0173893	Smaller	.	0.017813
DOID:10652	Alzheimer's_disease	AD	44	DOID:3070	Malignant_Glioma	MG	43	-0.435251	.	YES	-2.26686	0.0233989	Smaller	.	0.0228905
DOID:10652	Alzheimer's_disease	AD	44	DOID:9255	Frontotemporal_dementia	FTD	11	-0.3	.	YES	-2.16092	0.0307014	Smaller	.	0.0291779
DOID:10652	Alzheimer's_disease	AD	44	DOID:10763	Hypertension	HTN	22	-0.386364	.	YES	-2.14573	0.0318941	Smaller	.	0.0291779
DOID:10652	Alzheimer's_disease	AD	44	DOID:219	Colon_Cancer	HCNC	46	-0.415481	.	YES	-2.12508	0.0335796	Smaller	.	0.0291779
DOID:10652	Alzheimer's_disease	AD	44	DOID:684	Hepatocellular_Carcinoma	HCC	65	-0.40025	.	YES	-2.11276	0.0346211	Smaller	.	0.0291779
DOID:10652	Alzheimer's_disease	AD	44	DOID:1749	Squamous_Cell_Carcinoma	SCC	51	-0.419786	.	YES	-2.11158	0.0347226	Smaller	.	0.0291779
DOID:10652	Alzheimer's_disease	AD	44	DOID:10534	Stomach_Cancer	SC	166	-0.290312	.	YES	-1.90767	0.0564338	Smaller	.	0.0461293
DOID:10652	Alzheimer's_disease	AD	44	DOID:1826	Epilepsy_syndrome	Epi	18	-0.28796	.	YES	-1.72935	0.0837464	Smaller	.	0.0718213
DOID:10652	Alzheimer's_disease	AD	44	DOID:3119	Gastrointestinal_System_Cancer	GISC	125	-0.29481	.	YES	-1.50493	0.132343	Smaller	.	0.106771
DOID:10652	Alzheimer's_disease	AD	44	DOID:12858	Huntington's_disease	HD	5	-0.0380334	.	YES	-1.16424	0.244325	Smaller	.	0.216361
DOID:10652	Alzheimer's_disease	AD	44	DOID:2234	Focal_Epilepsy	FEpi	2	-0.0335968	.	YES	-0.928158	0.353325	Smaller	.	0.294184
DOID:10652	Alzheimer's_disease	AD	44	DOID:3717	Gastric_Adenocarcinoma	GAC	7	0.0297937	YES	.	-0.515528	0.606184	Smaller	.	0.49472
DOID:10652	Alzheimer's_disease	AD	44	DOID:3620	Central_Nervous_System_Cancer	CNSC	22	-0.166667	.	YES	-0.462701	0.643578	Smaller	.	0.554217
DOID:10652	Alzheimer's_disease	AD	44	DOID:1059	Intellectual_Disability	ID	15	-0.098151	.	YES	-0.43902	0.660647	Smaller	.	0.554217
DOID:10652	Alzheimer's_disease	AD	44	DOID:0060041	Autism_Spectrum_Disorder	ASD	10	-0.00606061	.	YES	-0.337235	0.73594	Smaller	.	0.614436
DOID:10652	Alzheimer's_disease	AD	44	DOID:12849	Autistic_disorder	AUT	10	-0.00606061	.	YES	-0.269244	0.787742	Smaller	.	0.677821
DOID:10652	Alzheimer's_disease	AD	44	DOID:3312	Bipolar_disorder	BI	17	-0.0649163	.	YES	-0.0225522	0.982007	Smaller	.	0.805432
DOID:10652	Alzheimer's_disease	AD	44	DOID:10652	Alzheimer's_disease	AD	44	0	.	.	0	1	larger	.	1
DOID:10652	Alzheimer's_disease	AD	44	DOID:6270	Gastric_Cardia_Carcinoma	GCCA	1	.	.	.	.	.	.	.	NA
DOID:10652	Alzheimer's_disease	AD	44	DOID:10540	Gastric_Lymphoma	GLC	1	.	.	.	.	.	.	.	NA
DOID:10652	Alzheimer's_disease	AD	44	DOID:3328	Temporal_Lobe_Epilepsy	TLE	1	.	.	.	.	.	.	.	NA
DOID:0060041	Autism_Spectrum_Disorder	ASD	10	DOID:1059	Intellectual_Disability	ID	15	-0.38	.	YES	-1.51529	0.129699	Smaller	.	0.106771
DOID:0060041	Autism_Spectrum_Disorder	ASD	10	DOID:3093	Nervous_System_Cancer	NSC	42	-0.189377	.	YES	-1.4739	0.140508	Smaller	.	0.129115
DOID:0060041	Autism_Spectrum_Disorder	ASD	10	DOID:10763	Hypertension	HTN	22	-0.277841	.	YES	-1.2844	0.199003	Smaller	.	0.183347
DOID:0060041	Autism_Spectrum_Disorder	ASD	10	DOID:3620	Central_Nervous_System_Cancer	CNSC	22	-0.255114	.	YES	-1.13663	0.255695	Smaller	.	0.216361
DOID:0060041	Autism_Spectrum_Disorder	ASD	10	DOID:14330	Parkinson's_disease	PD	28	-0.221429	.	YES	-1.13146	0.257861	Smaller	.	0.216361
DOID:0060041	Autism_Spectrum_Disorder	ASD	10	DOID:9255	Frontotemporal_dementia	FTD	11	-0.328571	.	YES	-1.11008	0.266965	Smaller	.	0.216361
DOID:0060041	Autism_Spectrum_Disorder	ASD	10	DOID:3717	Gastric_Adenocarcinoma	GAC	7	-0.332773	.	YES	-1.0623	0.288098	Smaller	.	0.252978
DOID:0060041	Autism_Spectrum_Disorder	ASD	10	DOID:12858	Huntington's_disease	HD	5	-0.233333	.	YES	-0.624901	0.532036	Smaller	.	0.439556
DOID:0060041	Autism_Spectrum_Disorder	ASD	10	DOID:3070	Malignant_Glioma	MG	43	-0.0489688	.	YES	-0.591435	0.554229	Smaller	.	0.49472
DOID:0060041	Autism_Spectrum_Disorder	ASD	10	DOID:2234	Focal_Epilepsy	FEpi	2	0.183333	YES	.	0.568804	0.569489	larger	.	0.49472
DOID:0060041	Autism_Spectrum_Disorder	ASD	10	DOID:1909	Melanoma	MEL	50	-0.02	.	YES	-0.56292	0.573489	Smaller	.	0.49472
DOID:0060041	Autism_Spectrum_Disorder	ASD	10	DOID:1749	Squamous_Cell_Carcinoma	SCC	51	-0.00607522	.	YES	-0.49461	0.620875	Smaller	.	0.554217
DOID:0060041	Autism_Spectrum_Disorder	ASD	10	DOID:5517	Stomach_Carcinoma	SCA	18	-0.157937	.	YES	-0.457366	0.647408	Smaller	.	0.554217
DOID:0060041	Autism_Spectrum_Disorder	ASD	10	DOID:1192	Peripheral_Nervous_System_Neoplasm	PNSN	17	-0.124401	.	YES	-0.348778	0.727256	Smaller	.	0.614436
DOID:0060041	Autism_Spectrum_Disorder	ASD	10	DOID:769	NeuroBlastoma	NB	14	-0.0309524	.	YES	0.347322	0.72835	larger	.	0.614436
DOID:0060041	Autism_Spectrum_Disorder	ASD	10	DOID:219	Colon_Cancer	HCNC	46	0.0060559	YES	.	-0.269682	0.787405	Smaller	.	0.677821
DOID:0060041	Autism_Spectrum_Disorder	ASD	10	DOID:2621	Autonomic_Nervous_System_Neoplasm	ANSN	14	-0.0309524	.	YES	0.22333	0.823278	larger	.	0.677821
DOID:0060041	Autism_Spectrum_Disorder	ASD	10	DOID:1826	Epilepsy_syndrome	Epi	18	-0.0269841	.	YES	0.2171	0.828131	larger	.	0.677821
DOID:0060041	Autism_Spectrum_Disorder	ASD	10	DOID:10534	Stomach_Cancer	SC	166	0.249028	YES	.	-0.163956	0.869765	Smaller	.	0.741221
DOID:0060041	Autism_Spectrum_Disorder	ASD	10	DOID:3119	Gastrointestinal_System_Cancer	GISC	125	0.238667	YES	.	0.116555	0.907213	larger	.	0.741221
DOID:0060041	Autism_Spectrum_Disorder	ASD	10	DOID:684	Hepatocellular_Carcinoma	HCC	65	0.1	YES	.	-0.0863766	0.931167	Smaller	.	0.805432
DOID:0060041	Autism_Spectrum_Disorder	ASD	10	DOID:1612	Breast_Cancer	BC	104	0.19143	YES	.	-0.0260257	0.979237	Smaller	.	0.805432
DOID:0060041	Autism_Spectrum_Disorder	ASD	10	DOID:0060041	Autism_Spectrum_Disorder	ASD	10	0	.	.	0	1	larger	.	1
DOID:0060041	Autism_Spectrum_Disorder	ASD	10	DOID:6270	Gastric_Cardia_Carcinoma	GCCA	1	.	.	.	.	.	.	.	NA
DOID:0060041	Autism_Spectrum_Disorder	ASD	10	DOID:10540	Gastric_Lymphoma	GLC	1	.	.	.	.	.	.	.	NA
DOID:0060041	Autism_Spectrum_Disorder	ASD	10	DOID:3328	Temporal_Lobe_Epilepsy	TLE	1	.	.	.	.	.	.	.	NA
DOID:12849	Autistic_disorder	AUT	10	DOID:0060041	Autism_Spectrum_Disorder	ASD	10	-1.8	.	YES	-8.42602	3.58e-17	Smaller	***	0
DOID:12849	Autistic_disorder	AUT	10	DOID:1059	Intellectual_Disability	ID	15	-0.38	.	YES	-1.49071	0.136037	Smaller	.	0.129115
DOID:12849	Autistic_disorder	AUT	10	DOID:3093	Nervous_System_Cancer	NSC	42	-0.189377	.	YES	-1.4303	0.152632	Smaller	.	0.129115
DOID:12849	Autistic_disorder	AUT	10	DOID:10763	Hypertension	HTN	22	-0.277841	.	YES	-1.22903	0.21906	Smaller	.	0.183347
DOID:12849	Autistic_disorder	AUT	10	DOID:14330	Parkinson's_disease	PD	28	-0.221429	.	YES	-1.14645	0.251608	Smaller	.	0.216361
DOID:12849	Autistic_disorder	AUT	10	DOID:9255	Frontotemporal_dementia	FTD	11	-0.328571	.	YES	-1.12878	0.258992	Smaller	.	0.216361
DOID:12849	Autistic_disorder	AUT	10	DOID:3717	Gastric_Adenocarcinoma	GAC	7	-0.332773	.	YES	-1.09891	0.271807	Smaller	.	0.252978
DOID:12849	Autistic_disorder	AUT	10	DOID:3620	Central_Nervous_System_Cancer	CNSC	22	-0.255114	.	YES	-1.08195	0.279273	Smaller	.	0.252978
DOID:12849	Autistic_disorder	AUT	10	DOID:12858	Huntington's_disease	HD	5	-0.233333	.	YES	-0.649833	0.5158	Smaller	.	0.439556
DOID:12849	Autistic_disorder	AUT	10	DOID:3070	Malignant_Glioma	MG	43	-0.0489688	.	YES	-0.568913	0.569415	Smaller	.	0.49472
DOID:12849	Autistic_disorder	AUT	10	DOID:2234	Focal_Epilepsy	FEpi	2	0.183333	YES	.	0.547973	0.583711	larger	.	0.49472
DOID:12849	Autistic_disorder	AUT	10	DOID:1909	Melanoma	MEL	50	-0.02	.	YES	-0.47741	0.63307	Smaller	.	0.554217
DOID:12849	Autistic_disorder	AUT	10	DOID:1749	Squamous_Cell_Carcinoma	SCC	51	-0.00607522	.	YES	-0.460733	0.64499	Smaller	.	0.554217
DOID:12849	Autistic_disorder	AUT	10	DOID:5517	Stomach_Carcinoma	SCA	18	-0.157937	.	YES	-0.446377	0.655325	Smaller	.	0.554217
DOID:12849	Autistic_disorder	AUT	10	DOID:769	NeuroBlastoma	NB	14	-0.0309524	.	YES	0.344294	0.730625	larger	.	0.614436
DOID:12849	Autistic_disorder	AUT	10	DOID:219	Colon_Cancer	HCNC	46	0.0060559	YES	.	-0.296643	0.766739	Smaller	.	0.677821
DOID:12849	Autistic_disorder	AUT	10	DOID:2621	Autonomic_Nervous_System_Neoplasm	ANSN	14	-0.0309524	.	YES	0.265886	0.790327	larger	.	0.677821
DOID:12849	Autistic_disorder	AUT	10	DOID:1826	Epilepsy_syndrome	Epi	18	-0.0269841	.	YES	0.242761	0.80819	larger	.	0.677821
DOID:12849	Autistic_disorder	AUT	10	DOID:1192	Peripheral_Nervous_System_Neoplasm	PNSN	17	-0.124401	.	YES	-0.225478	0.821607	Smaller	.	0.677821
DOID:12849	Autistic_disorder	AUT	10	DOID:3119	Gastrointestinal_System_Cancer	GISC	125	0.238667	YES	.	0.171593	0.863758	larger	.	0.741221
DOID:12849	Autistic_disorder	AUT	10	DOID:10534	Stomach_Cancer	SC	166	0.249028	YES	.	-0.0875661	0.930222	Smaller	.	0.805432
DOID:12849	Autistic_disorder	AUT	10	DOID:5419	Schizophrenia	SCH	54	0.0797454	YES	.	0.0594255	0.952613	larger	.	0.805432
DOID:12849	Autistic_disorder	AUT	10	DOID:1612	Breast_Cancer	BC	104	0.19143	YES	.	0.0588922	0.953038	larger	.	0.805432
DOID:12849	Autistic_disorder	AUT	10	DOID:684	Hepatocellular_Carcinoma	HCC	65	0.1	YES	.	-0.0190787	0.984778	Smaller	.	0.805432
DOID:12849	Autistic_disorder	AUT	10	DOID:12849	Autistic_disorder	AUT	10	0	.	.	0	1	larger	.	1
DOID:12849	Autistic_disorder	AUT	10	DOID:6270	Gastric_Cardia_Carcinoma	GCCA	1	.	.	.	.	.	.	.	NA
DOID:12849	Autistic_disorder	AUT	10	DOID:10540	Gastric_Lymphoma	GLC	1	.	.	.	.	.	.	.	NA
DOID:12849	Autistic_disorder	AUT	10	DOID:3328	Temporal_Lobe_Epilepsy	TLE	1	.	.	.	.	.	.	.	NA
DOID:2621	Autonomic_Nervous_System_Neoplasm	ANSN	14	DOID:1192	Peripheral_Nervous_System_Neoplasm	PNSN	17	-1.25888	.	YES	-6.52656	6.73e-11	Smaller	***	0
DOID:2621	Autonomic_Nervous_System_Neoplasm	ANSN	14	DOID:3093	Nervous_System_Cancer	NSC	42	-0.547619	.	YES	-3.75461	0.000173614	Smaller	.	0.000250329
DOID:2621	Autonomic_Nervous_System_Neoplasm	ANSN	14	DOID:5517	Stomach_Carcinoma	SCA	18	-0.592758	.	YES	-2.90266	0.0037001	Smaller	.	0.00344828
DOID:2621	Autonomic_Nervous_System_Neoplasm	ANSN	14	DOID:3070	Malignant_Glioma	MG	43	-0.248557	.	YES	-1.64934	0.0990772	Smaller	.	0.087905
DOID:2621	Autonomic_Nervous_System_Neoplasm	ANSN	14	DOID:3717	Gastric_Adenocarcinoma	GAC	7	-0.214286	.	YES	-0.767924	0.442532	Smaller	.	0.387709
DOID:2621	Autonomic_Nervous_System_Neoplasm	ANSN	14	DOID:3620	Central_Nervous_System_Cancer	CNSC	22	-0.21176	.	YES	-0.731715	0.464343	Smaller	.	0.387709
DOID:2621	Autonomic_Nervous_System_Neoplasm	ANSN	14	DOID:10534	Stomach_Cancer	SC	166	0.219717	YES	.	0.198878	0.842359	larger	.	0.741221
DOID:2621	Autonomic_Nervous_System_Neoplasm	ANSN	14	DOID:3119	Gastrointestinal_System_Cancer	GISC	125	0.139009	YES	.	-0.163931	0.869785	Smaller	.	0.741221
DOID:2621	Autonomic_Nervous_System_Neoplasm	ANSN	14	DOID:2621	Autonomic_Nervous_System_Neoplasm	ANSN	14	0	.	.	0	1	larger	.	1
DOID:2621	Autonomic_Nervous_System_Neoplasm	ANSN	14	DOID:6270	Gastric_Cardia_Carcinoma	GCCA	1	.	.	.	.	.	.	.	NA
DOID:2621	Autonomic_Nervous_System_Neoplasm	ANSN	14	DOID:10540	Gastric_Lymphoma	GLC	1	.	.	.	.	.	.	.	NA
DOID:3312	Bipolar_disorder	BI	17	DOID:5419	Schizophrenia	SCH	54	-0.272546	.	YES	-1.86162	0.0626566	Smaller	.	0.058095
DOID:3312	Bipolar_disorder	BI	17	DOID:1059	Intellectual_Disability	ID	15	0.192647	YES	.	1.71168	0.0869561	larger	.	0.0718213
DOID:3312	Bipolar_disorder	BI	17	DOID:3717	Gastric_Adenocarcinoma	GAC	7	0.290266	YES	.	1.53045	0.125905	larger	.	0.106771
DOID:3312	Bipolar_disorder	BI	17	DOID:769	NeuroBlastoma	NB	14	0.145297	YES	.	1.43106	0.152413	larger	.	0.129115
DOID:3312	Bipolar_disorder	BI	17	DOID:12858	Huntington's_disease	HD	5	0.299465	YES	.	1.28191	0.199873	larger	.	0.183347
DOID:3312	Bipolar_disorder	BI	17	DOID:2621	Autonomic_Nervous_System_Neoplasm	ANSN	14	0.145297	YES	.	1.27799	0.201252	larger	.	0.183347
DOID:3312	Bipolar_disorder	BI	17	DOID:1192	Peripheral_Nervous_System_Neoplasm	PNSN	17	0.0882353	YES	.	1.15312	0.248863	larger	.	0.216361
DOID:3312	Bipolar_disorder	BI	17	DOID:684	Hepatocellular_Carcinoma	HCC	65	-0.128694	.	YES	-1.02446	0.305617	Smaller	.	0.252978
DOID:3312	Bipolar_disorder	BI	17	DOID:5517	Stomach_Carcinoma	SCA	18	0.0525677	YES	.	0.96451	0.33479	larger	.	0.294184
DOID:3312	Bipolar_disorder	BI	17	DOID:0060041	Autism_Spectrum_Disorder	ASD	10	-0.263834	.	YES	-0.958853	0.337633	Smaller	.	0.294184
DOID:3312	Bipolar_disorder	BI	17	DOID:1909	Melanoma	MEL	50	0.0797366	YES	.	0.946211	0.344041	larger	.	0.294184
DOID:3312	Bipolar_disorder	BI	17	DOID:12849	Autistic_disorder	AUT	10	-0.263834	.	YES	-0.924397	0.35528	Smaller	.	0.294184
DOID:3312	Bipolar_disorder	BI	17	DOID:10534	Stomach_Cancer	SC	166	0.0550195	YES	.	-0.8304	0.406313	Smaller	.	0.3382
DOID:3312	Bipolar_disorder	BI	17	DOID:3620	Central_Nervous_System_Cancer	CNSC	22	-0.211024	.	YES	-0.658223	0.510395	Smaller	.	0.439556
DOID:3312	Bipolar_disorder	BI	17	DOID:14330	Parkinson's_disease	PD	28	-0.19267	.	YES	-0.62772	0.530187	Smaller	.	0.439556
DOID:3312	Bipolar_disorder	BI	17	DOID:10763	Hypertension	HTN	22	-0.0286233	.	YES	0.492382	0.62245	larger	.	0.554217
DOID:3312	Bipolar_disorder	BI	17	DOID:219	Colon_Cancer	HCNC	46	0.00187756	YES	.	0.454673	0.649345	larger	.	0.554217
DOID:3312	Bipolar_disorder	BI	17	DOID:2234	Focal_Epilepsy	FEpi	2	0.249226	YES	.	0.433328	0.664776	larger	.	0.554217
DOID:3312	Bipolar_disorder	BI	17	DOID:3119	Gastrointestinal_System_Cancer	GISC	125	0.0544358	YES	.	-0.372286	0.70968	Smaller	.	0.614436
DOID:3312	Bipolar_disorder	BI	17	DOID:9255	Frontotemporal_dementia	FTD	11	-0.132353	.	YES	-0.298171	0.765573	Smaller	.	0.677821
DOID:3312	Bipolar_disorder	BI	17	DOID:1826	Epilepsy_syndrome	Epi	18	-0.145051	.	YES	-0.258205	0.796249	Smaller	.	0.677821
DOID:3312	Bipolar_disorder	BI	17	DOID:1612	Breast_Cancer	BC	104	0.0392936	YES	.	-0.218238	0.827243	Smaller	.	0.677821
DOID:3312	Bipolar_disorder	BI	17	DOID:1749	Squamous_Cell_Carcinoma	SCC	51	-0.0588235	.	YES	-0.14956	0.881112	Smaller	.	0.741221
DOID:3312	Bipolar_disorder	BI	17	DOID:3070	Malignant_Glioma	MG	43	-0.0718878	.	YES	-0.0587549	0.953147	Smaller	.	0.805432
DOID:3312	Bipolar_disorder	BI	17	DOID:3093	Nervous_System_Cancer	NSC	42	-0.0625386	.	YES	0.00639289	0.994899	larger	.	0.805432
DOID:3312	Bipolar_disorder	BI	17	DOID:3312	Bipolar_disorder	BI	17	0	.	.	0	1	larger	.	1
DOID:3312	Bipolar_disorder	BI	17	DOID:6270	Gastric_Cardia_Carcinoma	GCCA	1	.	.	.	.	.	.	.	NA
DOID:3312	Bipolar_disorder	BI	17	DOID:10540	Gastric_Lymphoma	GLC	1	.	.	.	.	.	.	.	NA
DOID:3312	Bipolar_disorder	BI	17	DOID:3328	Temporal_Lobe_Epilepsy	TLE	1	.	.	.	.	.	.	.	NA
DOID:1612	Breast_Cancer	BC	104	DOID:3119	Gastrointestinal_System_Cancer	GISC	125	-0.683946	.	YES	-4.99749	5.81e-07	Smaller	***	2.09e-06
DOID:1612	Breast_Cancer	BC	104	DOID:3070	Malignant_Glioma	MG	43	-0.544166	.	YES	-4.33694	1.44e-05	Smaller	**	3.55e-05
DOID:1612	Breast_Cancer	BC	104	DOID:1749	Squamous_Cell_Carcinoma	SCC	51	-0.546687	.	YES	-4.0878	4.35e-05	Smaller	*	8.97e-05
DOID:1612	Breast_Cancer	BC	104	DOID:10534	Stomach_Cancer	SC	166	-0.621838	.	YES	-4.07645	4.57e-05	Smaller	*	8.97e-05
DOID:1612	Breast_Cancer	BC	104	DOID:219	Colon_Cancer	HCNC	46	-0.527113	.	YES	-4.06889	4.72e-05	Smaller	*	8.97e-05
DOID:1612	Breast_Cancer	BC	104	DOID:1909	Melanoma	MEL	50	-0.502368	.	YES	-3.55364	0.000379935	Smaller	.	0.000498571
DOID:1612	Breast_Cancer	BC	104	DOID:684	Hepatocellular_Carcinoma	HCC	65	-0.500888	.	YES	-3.15142	0.00162481	Smaller	.	0.00191293
DOID:1612	Breast_Cancer	BC	104	DOID:3093	Nervous_System_Cancer	NSC	42	-0.383687	.	YES	-2.57405	0.0100515	Smaller	.	0.0104763
DOID:1612	Breast_Cancer	BC	104	DOID:5517	Stomach_Carcinoma	SCA	18	-0.189751	.	YES	-2.32093	0.0202908	Smaller	.	0.017813
DOID:1612	Breast_Cancer	BC	104	DOID:2621	Autonomic_Nervous_System_Neoplasm	ANSN	14	0.0500559	YES	.	-0.637687	0.523677	Smaller	.	0.439556
DOID:1612	Breast_Cancer	BC	104	DOID:769	NeuroBlastoma	NB	14	0.0500559	YES	.	-0.515541	0.606175	Smaller	.	0.49472
DOID:1612	Breast_Cancer	BC	104	DOID:1192	Peripheral_Nervous_System_Neoplasm	PNSN	17	0.0174171	YES	.	-0.482348	0.629559	Smaller	.	0.554217
DOID:1612	Breast_Cancer	BC	104	DOID:3620	Central_Nervous_System_Cancer	CNSC	22	-0.0511988	.	YES	-0.465545	0.641541	Smaller	.	0.554217
DOID:1612	Breast_Cancer	BC	104	DOID:2234	Focal_Epilepsy	FEpi	2	0.300798	YES	.	-0.412058	0.680297	Smaller	.	0.554217
DOID:1612	Breast_Cancer	BC	104	DOID:3717	Gastric_Adenocarcinoma	GAC	7	0.23317	YES	.	-0.266906	0.789541	Smaller	.	0.677821
DOID:1612	Breast_Cancer	BC	104	DOID:1612	Breast_Cancer	BC	104	0	.	.	0	1	larger	.	1
DOID:1612	Breast_Cancer	BC	104	DOID:6270	Gastric_Cardia_Carcinoma	GCCA	1	.	.	.	.	.	.	.	NA
DOID:1612	Breast_Cancer	BC	104	DOID:10540	Gastric_Lymphoma	GLC	1	.	.	.	.	.	.	.	NA
DOID:1612	Breast_Cancer	BC	104	DOID:3328	Temporal_Lobe_Epilepsy	TLE	1	.	.	.	.	.	.	.	NA
DOID:3620	Central_Nervous_System_Cancer	CNSC	22	DOID:5517	Stomach_Carcinoma	SCA	18	-0.458586	.	YES	-2.21424	0.0268123	Smaller	.	0.0228905
DOID:3620	Central_Nervous_System_Cancer	CNSC	22	DOID:3070	Malignant_Glioma	MG	43	-0.337437	.	YES	-1.8055	0.0709968	Smaller	.	0.058095
DOID:3620	Central_Nervous_System_Cancer	CNSC	22	DOID:10534	Stomach_Cancer	SC	166	-0.00921675	.	YES	-0.796539	0.425719	Smaller	.	0.387709
DOID:3620	Central_Nervous_System_Cancer	CNSC	22	DOID:3119	Gastrointestinal_System_Cancer	GISC	125	-0.0351119	.	YES	-0.611552	0.540834	Smaller	.	0.439556
DOID:3620	Central_Nervous_System_Cancer	CNSC	22	DOID:3717	Gastric_Adenocarcinoma	GAC	7	0.0261979	YES	.	0.105754	0.915777	larger	.	0.741221
DOID:3620	Central_Nervous_System_Cancer	CNSC	22	DOID:3620	Central_Nervous_System_Cancer	CNSC	22	0	.	.	0	1	larger	.	1
DOID:3620	Central_Nervous_System_Cancer	CNSC	22	DOID:6270	Gastric_Cardia_Carcinoma	GCCA	1	.	.	.	.	.	.	.	NA
DOID:3620	Central_Nervous_System_Cancer	CNSC	22	DOID:10540	Gastric_Lymphoma	GLC	1	.	.	.	.	.	.	.	NA
DOID:219	Colon_Cancer	HCNC	46	DOID:3119	Gastrointestinal_System_Cancer	GISC	125	-0.513444	.	YES	-4.22823	2.36e-05	Smaller	*	4.17e-05
DOID:219	Colon_Cancer	HCNC	46	DOID:3070	Malignant_Glioma	MG	43	-0.620116	.	YES	-4.22523	2.39e-05	Smaller	*	4.17e-05
DOID:219	Colon_Cancer	HCNC	46	DOID:5517	Stomach_Carcinoma	SCA	18	-0.501434	.	YES	-3.34328	0.000827934	Smaller	.	0.000976281
DOID:219	Colon_Cancer	HCNC	46	DOID:10534	Stomach_Cancer	SC	166	-0.353195	.	YES	-2.61287	0.00897842	Smaller	.	0.00805641
DOID:219	Colon_Cancer	HCNC	46	DOID:3093	Nervous_System_Cancer	NSC	42	-0.458122	.	YES	-2.57684	0.00997078	Smaller	.	0.0104763
DOID:219	Colon_Cancer	HCNC	46	DOID:3717	Gastric_Adenocarcinoma	GAC	7	-0.116518	.	YES	-1.42908	0.152982	Smaller	.	0.129115
DOID:219	Colon_Cancer	HCNC	46	DOID:2621	Autonomic_Nervous_System_Neoplasm	ANSN	14	-0.190373	.	YES	-1.37508	0.169105	Smaller	.	0.154545
DOID:219	Colon_Cancer	HCNC	46	DOID:1192	Peripheral_Nervous_System_Neoplasm	PNSN	17	-0.218477	.	YES	-1.2899	0.197086	Smaller	.	0.183347
DOID:219	Colon_Cancer	HCNC	46	DOID:769	NeuroBlastoma	NB	14	-0.190373	.	YES	-1.24732	0.212281	Smaller	.	0.183347
DOID:219	Colon_Cancer	HCNC	46	DOID:3620	Central_Nervous_System_Cancer	CNSC	22	-0.212451	.	YES	-0.896206	0.370143	Smaller	.	0.3382
DOID:219	Colon_Cancer	HCNC	46	DOID:2234	Focal_Epilepsy	FEpi	2	0.173913	YES	.	-0.360557	0.718431	Smaller	.	0.614436
DOID:219	Colon_Cancer	HCNC	46	DOID:219	Colon_Cancer	HCNC	46	0	.	.	0	1	larger	.	1
DOID:219	Colon_Cancer	HCNC	46	DOID:6270	Gastric_Cardia_Carcinoma	GCCA	1	.	.	.	.	.	.	.	NA
DOID:219	Colon_Cancer	HCNC	46	DOID:10540	Gastric_Lymphoma	GLC	1	.	.	.	.	.	.	.	NA
DOID:219	Colon_Cancer	HCNC	46	DOID:3328	Temporal_Lobe_Epilepsy	TLE	1	.	.	.	.	.	.	.	NA
DOID:1826	Epilepsy_syndrome	Epi	18	DOID:1612	Breast_Cancer	BC	104	-0.117346	.	YES	-1.62793	0.10354	Smaller	.	0.087905
DOID:1826	Epilepsy_syndrome	Epi	18	DOID:1749	Squamous_Cell_Carcinoma	SCC	51	-0.235223	.	YES	-1.48311	0.138045	Smaller	.	0.129115
DOID:1826	Epilepsy_syndrome	Epi	18	DOID:10534	Stomach_Cancer	SC	166	-0.0120118	.	YES	-1.4235	0.154592	Smaller	.	0.129115
DOID:1826	Epilepsy_syndrome	Epi	18	DOID:3717	Gastric_Adenocarcinoma	GAC	7	0.24873	YES	.	1.38587	0.165786	larger	.	0.154545
DOID:1826	Epilepsy_syndrome	Epi	18	DOID:3093	Nervous_System_Cancer	NSC	42	-0.243651	.	YES	-1.19477	0.232178	Smaller	.	0.216361
DOID:1826	Epilepsy_syndrome	Epi	18	DOID:3119	Gastrointestinal_System_Cancer	GISC	125	-0.0398493	.	YES	-1.1749	0.240037	Smaller	.	0.216361
DOID:1826	Epilepsy_syndrome	Epi	18	DOID:2234	Focal_Epilepsy	FEpi	2	-0.305556	.	YES	-1.14649	0.251592	Smaller	.	0.216361
DOID:1826	Epilepsy_syndrome	Epi	18	DOID:3070	Malignant_Glioma	MG	43	-0.215582	.	YES	-1.12933	0.258758	Smaller	.	0.216361
DOID:1826	Epilepsy_syndrome	Epi	18	DOID:3620	Central_Nervous_System_Cancer	CNSC	22	-0.266919	.	YES	-1.06871	0.2852	Smaller	.	0.252978
DOID:1826	Epilepsy_syndrome	Epi	18	DOID:219	Colon_Cancer	HCNC	46	-0.194143	.	YES	-1.02179	0.306879	Smaller	.	0.252978
DOID:1826	Epilepsy_syndrome	Epi	18	DOID:14330	Parkinson's_disease	PD	28	-0.257419	.	YES	-0.985722	0.324269	Smaller	.	0.294184
DOID:1826	Epilepsy_syndrome	Epi	18	DOID:684	Hepatocellular_Carcinoma	HCC	65	-0.116399	.	YES	-0.828609	0.407326	Smaller	.	0.3382
DOID:1826	Epilepsy_syndrome	Epi	18	DOID:1909	Melanoma	MEL	50	-0.146144	.	YES	-0.754102	0.450788	Smaller	.	0.387709
DOID:1826	Epilepsy_syndrome	Epi	18	DOID:12858	Huntington's_disease	HD	5	0.150966	YES	.	0.572386	0.56706	larger	.	0.49472
DOID:1826	Epilepsy_syndrome	Epi	18	DOID:5517	Stomach_Carcinoma	SCA	18	-0.194444	.	YES	-0.562256	0.573942	Smaller	.	0.49472
DOID:1826	Epilepsy_syndrome	Epi	18	DOID:10763	Hypertension	HTN	22	-0.189646	.	YES	-0.50116	0.616259	Smaller	.	0.49472
DOID:1826	Epilepsy_syndrome	Epi	18	DOID:1059	Intellectual_Disability	ID	15	-0.029798	.	YES	0.418196	0.675804	larger	.	0.554217
DOID:1826	Epilepsy_syndrome	Epi	18	DOID:2621	Autonomic_Nervous_System_Neoplasm	ANSN	14	-0.144841	.	YES	-0.382308	0.702233	Smaller	.	0.614436
DOID:1826	Epilepsy_syndrome	Epi	18	DOID:769	NeuroBlastoma	NB	14	-0.144841	.	YES	-0.265956	0.790273	Smaller	.	0.677821
DOID:1826	Epilepsy_syndrome	Epi	18	DOID:1192	Peripheral_Nervous_System_Neoplasm	PNSN	17	-0.0828665	.	YES	0.14077	0.888051	larger	.	0.741221
DOID:1826	Epilepsy_syndrome	Epi	18	DOID:9255	Frontotemporal_dementia	FTD	11	-0.0814176	.	YES	-0.0226404	0.981937	Smaller	.	0.805432
DOID:1826	Epilepsy_syndrome	Epi	18	DOID:1826	Epilepsy_syndrome	Epi	18	0	.	.	0	1	larger	.	1
DOID:1826	Epilepsy_syndrome	Epi	18	DOID:6270	Gastric_Cardia_Carcinoma	GCCA	1	.	.	.	.	.	.	.	NA
DOID:1826	Epilepsy_syndrome	Epi	18	DOID:10540	Gastric_Lymphoma	GLC	1	.	.	.	.	.	.	.	NA
DOID:1826	Epilepsy_syndrome	Epi	18	DOID:3328	Temporal_Lobe_Epilepsy	TLE	1	.	.	.	.	.	.	.	NA
DOID:2234	Focal_Epilepsy	FEpi	2	DOID:3717	Gastric_Adenocarcinoma	GAC	7	0.492063	YES	.	1.538	0.124049	larger	.	0.106771
DOID:2234	Focal_Epilepsy	FEpi	2	DOID:2621	Autonomic_Nervous_System_Neoplasm	ANSN	14	-0.464286	.	YES	-1.46206	0.143725	Smaller	.	0.129115
DOID:2234	Focal_Epilepsy	FEpi	2	DOID:769	NeuroBlastoma	NB	14	-0.464286	.	YES	-1.41245	0.157819	Smaller	.	0.129115
DOID:2234	Focal_Epilepsy	FEpi	2	DOID:1192	Peripheral_Nervous_System_Neoplasm	PNSN	17	-0.258514	.	YES	-0.992845	0.320785	Smaller	.	0.294184
DOID:2234	Focal_Epilepsy	FEpi	2	DOID:3620	Central_Nervous_System_Cancer	CNSC	22	-0.136364	.	YES	-0.816551	0.414185	Smaller	.	0.3382
DOID:2234	Focal_Epilepsy	FEpi	2	DOID:3093	Nervous_System_Cancer	NSC	42	0.004329	YES	.	-0.810605	0.417593	Smaller	.	0.3382
DOID:2234	Focal_Epilepsy	FEpi	2	DOID:3070	Malignant_Glioma	MG	43	0.0604651	YES	.	-0.688373	0.491218	Smaller	.	0.439556
DOID:2234	Focal_Epilepsy	FEpi	2	DOID:5517	Stomach_Carcinoma	SCA	18	-0.0722222	.	YES	-0.498947	0.617817	Smaller	.	0.554217
DOID:2234	Focal_Epilepsy	FEpi	2	DOID:3119	Gastrointestinal_System_Cancer	GISC	125	0.349953	YES	.	-0.350448	0.726002	Smaller	.	0.614436
DOID:2234	Focal_Epilepsy	FEpi	2	DOID:10534	Stomach_Cancer	SC	166	0.425273	YES	.	-0.239145	0.810993	Smaller	.	0.677821
DOID:2234	Focal_Epilepsy	FEpi	2	DOID:2234	Focal_Epilepsy	FEpi	2	0	.	.	0	1	larger	.	1
DOID:2234	Focal_Epilepsy	FEpi	2	DOID:6270	Gastric_Cardia_Carcinoma	GCCA	1	.	.	.	.	.	.	.	NA
DOID:2234	Focal_Epilepsy	FEpi	2	DOID:10540	Gastric_Lymphoma	GLC	1	.	.	.	.	.	.	.	NA
DOID:9255	Frontotemporal_dementia	FTD	11	DOID:684	Hepatocellular_Carcinoma	HCC	65	-0.192105	.	YES	-2.11647	0.0343052	Smaller	.	0.0291779
DOID:9255	Frontotemporal_dementia	FTD	11	DOID:3119	Gastrointestinal_System_Cancer	GISC	125	0.00876471	YES	.	-1.64688	0.0995834	Smaller	.	0.087905
DOID:9255	Frontotemporal_dementia	FTD	11	DOID:1612	Breast_Cancer	BC	104	-0.00986622	.	YES	-1.47933	0.139051	Smaller	.	0.129115
DOID:9255	Frontotemporal_dementia	FTD	11	DOID:10534	Stomach_Cancer	SC	166	0.0943605	YES	.	-1.26482	0.205937	Smaller	.	0.183347
DOID:9255	Frontotemporal_dementia	FTD	11	DOID:3070	Malignant_Glioma	MG	43	-0.158053	.	YES	-1.22269	0.221447	Smaller	.	0.183347
DOID:9255	Frontotemporal_dementia	FTD	11	DOID:3620	Central_Nervous_System_Cancer	CNSC	22	-0.242424	.	YES	-1.043	0.296947	Smaller	.	0.252978
DOID:9255	Frontotemporal_dementia	FTD	11	DOID:1749	Squamous_Cell_Carcinoma	SCC	51	-0.0825427	.	YES	-0.957979	0.338073	Smaller	.	0.294184
DOID:9255	Frontotemporal_dementia	FTD	11	DOID:3717	Gastric_Adenocarcinoma	GAC	7	-0.285714	.	YES	-0.93393	0.35034	Smaller	.	0.294184
DOID:9255	Frontotemporal_dementia	FTD	11	DOID:3093	Nervous_System_Cancer	NSC	42	-0.107592	.	YES	-0.86342	0.387907	Smaller	.	0.3382
DOID:9255	Frontotemporal_dementia	FTD	11	DOID:2234	Focal_Epilepsy	FEpi	2	-0.269231	.	YES	-0.762931	0.445505	Smaller	.	0.387709
DOID:9255	Frontotemporal_dementia	FTD	11	DOID:2621	Autonomic_Nervous_System_Neoplasm	ANSN	14	-0.154286	.	YES	-0.390149	0.696426	Smaller	.	0.614436
DOID:9255	Frontotemporal_dementia	FTD	11	DOID:769	NeuroBlastoma	NB	14	-0.154286	.	YES	-0.367008	0.713613	Smaller	.	0.614436
DOID:9255	Frontotemporal_dementia	FTD	11	DOID:1909	Melanoma	MEL	50	0.00295082	YES	.	-0.300842	0.763535	Smaller	.	0.614436
DOID:9255	Frontotemporal_dementia	FTD	11	DOID:1192	Peripheral_Nervous_System_Neoplasm	PNSN	17	-0.134454	.	YES	-0.288118	0.773257	Smaller	.	0.677821
DOID:9255	Frontotemporal_dementia	FTD	11	DOID:219	Colon_Cancer	HCNC	46	0.00286041	YES	.	-0.220088	0.825803	Smaller	.	0.677821
DOID:9255	Frontotemporal_dementia	FTD	11	DOID:5517	Stomach_Carcinoma	SCA	18	-0.101533	.	YES	-0.0845118	0.93265	Smaller	.	0.805432
DOID:9255	Frontotemporal_dementia	FTD	11	DOID:9255	Frontotemporal_dementia	FTD	11	0	.	.	0	1	larger	.	1
DOID:9255	Frontotemporal_dementia	FTD	11	DOID:6270	Gastric_Cardia_Carcinoma	GCCA	1	.	.	.	.	.	.	.	NA
DOID:9255	Frontotemporal_dementia	FTD	11	DOID:10540	Gastric_Lymphoma	GLC	1	.	.	.	.	.	.	.	NA
DOID:9255	Frontotemporal_dementia	FTD	11	DOID:3328	Temporal_Lobe_Epilepsy	TLE	1	.	.	.	.	.	.	.	NA
DOID:3717	Gastric_Adenocarcinoma	GAC	7	DOID:3070	Malignant_Glioma	MG	43	-0.125249	.	YES	-1.41957	0.155731	Smaller	.	0.129115
DOID:3717	Gastric_Adenocarcinoma	GAC	7	DOID:3717	Gastric_Adenocarcinoma	GAC	7	0	.	.	0	1	larger	.	1
DOID:3717	Gastric_Adenocarcinoma	GAC	7	DOID:6270	Gastric_Cardia_Carcinoma	GCCA	1	.	.	.	.	.	.	.	NA
DOID:3717	Gastric_Adenocarcinoma	GAC	7	DOID:10540	Gastric_Lymphoma	GLC	1	.	.	.	.	.	.	.	NA
DOID:6270	Gastric_Cardia_Carcinoma	GCCA	1	DOID:6270	Gastric_Cardia_Carcinoma	GCCA	1	0	.	.	0	1	larger	.	1
DOID:6270	Gastric_Cardia_Carcinoma	GCCA	1	DOID:3070	Malignant_Glioma	MG	43	.	.	.	.	.	.	.	NA
DOID:10540	Gastric_Lymphoma	GLC	1	DOID:10540	Gastric_Lymphoma	GLC	1	0	.	.	0	1	larger	.	1
DOID:10540	Gastric_Lymphoma	GLC	1	DOID:6270	Gastric_Cardia_Carcinoma	GCCA	1	.	.	.	.	.	.	.	NA
DOID:10540	Gastric_Lymphoma	GLC	1	DOID:3070	Malignant_Glioma	MG	43	.	.	.	.	.	.	.	NA
DOID:3119	Gastrointestinal_System_Cancer	GISC	125	DOID:3070	Malignant_Glioma	MG	43	-0.465154	.	YES	-3.78293	0.00015499	Smaller	.	0.000250329
DOID:3119	Gastrointestinal_System_Cancer	GISC	125	DOID:5517	Stomach_Carcinoma	SCA	18	-0.110362	.	YES	-1.87904	0.0602391	Smaller	.	0.058095
DOID:3119	Gastrointestinal_System_Cancer	GISC	125	DOID:3717	Gastric_Adenocarcinoma	GAC	7	0.284771	YES	.	-0.138232	0.890057	Smaller	.	0.741221
DOID:3119	Gastrointestinal_System_Cancer	GISC	125	DOID:3119	Gastrointestinal_System_Cancer	GISC	125	0	.	.	0	1	larger	.	1
DOID:3119	Gastrointestinal_System_Cancer	GISC	125	DOID:6270	Gastric_Cardia_Carcinoma	GCCA	1	.	.	.	.	.	.	.	NA
DOID:3119	Gastrointestinal_System_Cancer	GISC	125	DOID:10540	Gastric_Lymphoma	GLC	1	.	.	.	.	.	.	.	NA
DOID:684	Hepatocellular_Carcinoma	HCC	65	DOID:3119	Gastrointestinal_System_Cancer	GISC	125	-0.759579	.	YES	-6.90194	5.13e-12	Smaller	***	0
DOID:684	Hepatocellular_Carcinoma	HCC	65	DOID:10534	Stomach_Cancer	SC	166	-0.585983	.	YES	-5.04497	4.54e-07	Smaller	***	2.09e-06
DOID:684	Hepatocellular_Carcinoma	HCC	65	DOID:1749	Squamous_Cell_Carcinoma	SCC	51	-0.63499	.	YES	-4.38537	1.16e-05	Smaller	**	3.55e-05
DOID:684	Hepatocellular_Carcinoma	HCC	65	DOID:219	Colon_Cancer	HCNC	46	-0.500411	.	YES	-3.10338	0.00191321	Smaller	.	0.00191293
DOID:684	Hepatocellular_Carcinoma	HCC	65	DOID:3093	Nervous_System_Cancer	NSC	42	-0.488407	.	YES	-3.04668	0.00231385	Smaller	.	0.0026055
DOID:684	Hepatocellular_Carcinoma	HCC	65	DOID:3070	Malignant_Glioma	MG	43	-0.480276	.	YES	-2.93999	0.00328224	Smaller	.	0.00344828
DOID:684	Hepatocellular_Carcinoma	HCC	65	DOID:5517	Stomach_Carcinoma	SCA	18	-0.261981	.	YES	-2.0565	0.0397339	Smaller	.	0.0368943
DOID:684	Hepatocellular_Carcinoma	HCC	65	DOID:3620	Central_Nervous_System_Cancer	CNSC	22	-0.236364	.	YES	-1.50184	0.133139	Smaller	.	0.106771
DOID:684	Hepatocellular_Carcinoma	HCC	65	DOID:1192	Peripheral_Nervous_System_Neoplasm	PNSN	17	-0.122956	.	YES	-0.977776	0.328185	Smaller	.	0.294184
DOID:684	Hepatocellular_Carcinoma	HCC	65	DOID:2621	Autonomic_Nervous_System_Neoplasm	ANSN	14	-0.0484629	.	YES	-0.755824	0.449755	Smaller	.	0.387709
DOID:684	Hepatocellular_Carcinoma	HCC	65	DOID:3717	Gastric_Adenocarcinoma	GAC	7	0.072619	YES	.	-0.732796	0.463683	Smaller	.	0.387709
DOID:684	Hepatocellular_Carcinoma	HCC	65	DOID:769	NeuroBlastoma	NB	14	-0.0484629	.	YES	-0.613778	0.539362	Smaller	.	0.439556
DOID:684	Hepatocellular_Carcinoma	HCC	65	DOID:2234	Focal_Epilepsy	FEpi	2	0.243284	YES	.	-0.331158	0.740525	Smaller	.	0.614436
DOID:684	Hepatocellular_Carcinoma	HCC	65	DOID:684	Hepatocellular_Carcinoma	HCC	65	0	.	.	0	1	larger	.	1
DOID:684	Hepatocellular_Carcinoma	HCC	65	DOID:6270	Gastric_Cardia_Carcinoma	GCCA	1	.	.	.	.	.	.	.	NA
DOID:684	Hepatocellular_Carcinoma	HCC	65	DOID:10540	Gastric_Lymphoma	GLC	1	.	.	.	.	.	.	.	NA
DOID:684	Hepatocellular_Carcinoma	HCC	65	DOID:3328	Temporal_Lobe_Epilepsy	TLE	1	.	.	.	.	.	.	.	NA
DOID:12858	Huntington's_disease	HD	5	DOID:3070	Malignant_Glioma	MG	43	-0.0770349	.	YES	-1.31596	0.188187	Smaller	.	0.154545
DOID:12858	Huntington's_disease	HD	5	DOID:219	Colon_Cancer	HCNC	46	0.051364	YES	.	-0.765799	0.443796	Smaller	.	0.387709
DOID:12858	Huntington's_disease	HD	5	DOID:1749	Squamous_Cell_Carcinoma	SCC	51	0.0672269	YES	.	-0.746908	0.455119	Smaller	.	0.387709
DOID:12858	Huntington's_disease	HD	5	DOID:9255	Frontotemporal_dementia	FTD	11	-0.1875	.	YES	-0.533062	0.59399	Smaller	.	0.49472
DOID:12858	Huntington's_disease	HD	5	DOID:2234	Focal_Epilepsy	FEpi	2	0.0714286	YES	.	0.529508	0.596453	larger	.	0.49472
DOID:12858	Huntington's_disease	HD	5	DOID:1909	Melanoma	MEL	50	0.107273	YES	.	-0.522634	0.601229	Smaller	.	0.49472
DOID:12858	Huntington's_disease	HD	5	DOID:14330	Parkinson's_disease	PD	28	0.0270563	YES	.	-0.351915	0.724902	Smaller	.	0.614436
DOID:12858	Huntington's_disease	HD	5	DOID:3119	Gastrointestinal_System_Cancer	GISC	125	0.318154	YES	.	-0.32197	0.747475	Smaller	.	0.614436
DOID:12858	Huntington's_disease	HD	5	DOID:1612	Breast_Cancer	BC	104	0.295519	YES	.	-0.268341	0.788437	Smaller	.	0.677821
DOID:12858	Huntington's_disease	HD	5	DOID:684	Hepatocellular_Carcinoma	HCC	65	0.214286	YES	.	-0.234053	0.814943	Smaller	.	0.677821
DOID:12858	Huntington's_disease	HD	5	DOID:3093	Nervous_System_Cancer	NSC	42	0.132472	YES	.	-0.234026	0.814965	Smaller	.	0.677821
DOID:12858	Huntington's_disease	HD	5	DOID:769	NeuroBlastoma	NB	14	0.0225564	YES	.	0.179744	0.857353	larger	.	0.741221
DOID:12858	Huntington's_disease	HD	5	DOID:5517	Stomach_Carcinoma	SCA	18	0.0603865	YES	.	0.126911	0.899011	larger	.	0.741221
DOID:12858	Huntington's_disease	HD	5	DOID:3620	Central_Nervous_System_Cancer	CNSC	22	0.030303	YES	.	-0.102196	0.918601	Smaller	.	0.741221
DOID:12858	Huntington's_disease	HD	5	DOID:2621	Autonomic_Nervous_System_Neoplasm	ANSN	14	0.0225564	YES	.	0.101658	0.919028	larger	.	0.741221
DOID:12858	Huntington's_disease	HD	5	DOID:3717	Gastric_Adenocarcinoma	GAC	7	-0.119048	.	YES	-0.0804629	0.935869	Smaller	.	0.805432
DOID:12858	Huntington's_disease	HD	5	DOID:10534	Stomach_Cancer	SC	166	0.408564	YES	.	-0.0342719	0.97266	Smaller	.	0.805432
DOID:12858	Huntington's_disease	HD	5	DOID:1192	Peripheral_Nervous_System_Neoplasm	PNSN	17	0.0213904	YES	.	0.0182027	0.985477	larger	.	0.805432
DOID:12858	Huntington's_disease	HD	5	DOID:12858	Huntington's_disease	HD	5	0	.	.	0	1	larger	.	1
DOID:12858	Huntington's_disease	HD	5	DOID:6270	Gastric_Cardia_Carcinoma	GCCA	1	.	.	.	.	.	.	.	NA
DOID:12858	Huntington's_disease	HD	5	DOID:10540	Gastric_Lymphoma	GLC	1	.	.	.	.	.	.	.	NA
DOID:12858	Huntington's_disease	HD	5	DOID:3328	Temporal_Lobe_Epilepsy	TLE	1	.	.	.	.	.	.	.	NA
DOID:10763	Hypertension	HTN	22	DOID:3093	Nervous_System_Cancer	NSC	42	-0.516978	.	YES	-3.12932	0.0017521	Smaller	.	0.00191293
DOID:10763	Hypertension	HTN	22	DOID:1909	Melanoma	MEL	50	-0.41798	.	YES	-2.66169	0.00777485	Smaller	.	0.00805641
DOID:10763	Hypertension	HTN	22	DOID:5517	Stomach_Carcinoma	SCA	18	-0.506313	.	YES	-2.51089	0.0120428	Smaller	.	0.0104763
DOID:10763	Hypertension	HTN	22	DOID:3070	Malignant_Glioma	MG	43	-0.360164	.	YES	-1.9698	0.0488608	Smaller	.	0.0461293
DOID:10763	Hypertension	HTN	22	DOID:3717	Gastric_Adenocarcinoma	GAC	7	-0.37584	.	YES	-1.91153	0.0559367	Smaller	.	0.0461293
DOID:10763	Hypertension	HTN	22	DOID:2621	Autonomic_Nervous_System_Neoplasm	ANSN	14	-0.373377	.	YES	-1.75864	0.0786389	Smaller	.	0.0718213
DOID:10763	Hypertension	HTN	22	DOID:1192	Peripheral_Nervous_System_Neoplasm	PNSN	17	-0.390614	.	YES	-1.71091	0.0870968	Smaller	.	0.0718213
DOID:10763	Hypertension	HTN	22	DOID:769	NeuroBlastoma	NB	14	-0.373377	.	YES	-1.69431	0.0902065	Smaller	.	0.087905
DOID:10763	Hypertension	HTN	22	DOID:3620	Central_Nervous_System_Cancer	CNSC	22	-0.340909	.	YES	-1.41474	0.157144	Smaller	.	0.129115
DOID:10763	Hypertension	HTN	22	DOID:1612	Breast_Cancer	BC	104	-0.129482	.	YES	-1.23228	0.217844	Smaller	.	0.183347
DOID:10763	Hypertension	HTN	22	DOID:684	Hepatocellular_Carcinoma	HCC	65	-0.20162	.	YES	-1.17063	0.241746	Smaller	.	0.216361
DOID:10763	Hypertension	HTN	22	DOID:9255	Frontotemporal_dementia	FTD	11	-0.265152	.	YES	-1.16553	0.243805	Smaller	.	0.216361
DOID:10763	Hypertension	HTN	22	DOID:3119	Gastrointestinal_System_Cancer	GISC	125	-0.0714447	.	YES	-0.97131	0.331394	Smaller	.	0.294184
DOID:10763	Hypertension	HTN	22	DOID:14330	Parkinson's_disease	PD	28	-0.260519	.	YES	-0.942363	0.346007	Smaller	.	0.294184
DOID:10763	Hypertension	HTN	22	DOID:219	Colon_Cancer	HCNC	46	-0.220472	.	YES	-0.940872	0.346771	Smaller	.	0.294184
DOID:10763	Hypertension	HTN	22	DOID:1749	Squamous_Cell_Carcinoma	SCC	51	-0.210259	.	YES	-0.926073	0.354408	Smaller	.	0.294184
DOID:10763	Hypertension	HTN	22	DOID:10534	Stomach_Cancer	SC	166	-0.0213057	.	YES	-0.908002	0.363877	Smaller	.	0.294184
DOID:10763	Hypertension	HTN	22	DOID:12858	Huntington's_disease	HD	5	-0.103535	.	YES	-0.745925	0.455713	Smaller	.	0.387709
DOID:10763	Hypertension	HTN	22	DOID:2234	Focal_Epilepsy	FEpi	2	0.0909091	YES	.	-0.159147	0.873553	Smaller	.	0.741221
DOID:10763	Hypertension	HTN	22	DOID:10763	Hypertension	HTN	22	0	.	.	0	1	larger	.	1
DOID:10763	Hypertension	HTN	22	DOID:6270	Gastric_Cardia_Carcinoma	GCCA	1	.	.	.	.	.	.	.	NA
DOID:10763	Hypertension	HTN	22	DOID:10540	Gastric_Lymphoma	GLC	1	.	.	.	.	.	.	.	NA
DOID:10763	Hypertension	HTN	22	DOID:3328	Temporal_Lobe_Epilepsy	TLE	1	.	.	.	.	.	.	.	NA
DOID:1059	Intellectual_Disability	ID	15	DOID:3093	Nervous_System_Cancer	NSC	42	-0.261779	.	YES	-1.5837	0.113261	Smaller	.	0.106771
DOID:1059	Intellectual_Disability	ID	15	DOID:12858	Huntington's_disease	HD	5	0.25	YES	.	1.08271	0.278937	larger	.	0.252978
DOID:1059	Intellectual_Disability	ID	15	DOID:9255	Frontotemporal_dementia	FTD	11	-0.261538	.	YES	-0.971419	0.33134	Smaller	.	0.294184
DOID:1059	Intellectual_Disability	ID	15	DOID:1909	Melanoma	MEL	50	0.0876923	YES	.	0.840542	0.400605	larger	.	0.3382
DOID:1059	Intellectual_Disability	ID	15	DOID:2234	Focal_Epilepsy	FEpi	2	0.347059	YES	.	0.808151	0.419004	larger	.	0.3382
DOID:1059	Intellectual_Disability	ID	15	DOID:769	NeuroBlastoma	NB	14	0.0374384	YES	.	0.7937	0.42737	larger	.	0.387709
DOID:1059	Intellectual_Disability	ID	15	DOID:2621	Autonomic_Nervous_System_Neoplasm	ANSN	14	0.0374384	YES	.	0.71095	0.477115	larger	.	0.387709
DOID:1059	Intellectual_Disability	ID	15	DOID:10763	Hypertension	HTN	22	0.00036855	YES	.	0.606617	0.544105	larger	.	0.439556
DOID:1059	Intellectual_Disability	ID	15	DOID:219	Colon_Cancer	HCNC	46	0.0337491	YES	.	0.520202	0.602923	larger	.	0.49472
DOID:1059	Intellectual_Disability	ID	15	DOID:3717	Gastric_Adenocarcinoma	GAC	7	0.0506494	YES	.	0.500383	0.616805	larger	.	0.49472
DOID:1059	Intellectual_Disability	ID	15	DOID:14330	Parkinson's_disease	PD	28	-0.156312	.	YES	-0.429289	0.667713	Smaller	.	0.554217
DOID:1059	Intellectual_Disability	ID	15	DOID:5517	Stomach_Carcinoma	SCA	18	-0.0373737	.	YES	0.384488	0.700617	larger	.	0.614436
DOID:1059	Intellectual_Disability	ID	15	DOID:1749	Squamous_Cell_Carcinoma	SCC	51	0.0226381	YES	.	0.297411	0.766153	larger	.	0.677821
DOID:1059	Intellectual_Disability	ID	15	DOID:3070	Malignant_Glioma	MG	43	-0.0774659	.	YES	-0.288962	0.77261	Smaller	.	0.677821
DOID:1059	Intellectual_Disability	ID	15	DOID:10534	Stomach_Cancer	SC	166	0.186704	YES	.	0.192212	0.847576	larger	.	0.741221
DOID:1059	Intellectual_Disability	ID	15	DOID:684	Hepatocellular_Carcinoma	HCC	65	0	.	.	-0.148544	0.881913	Smaller	.	0.741221
DOID:1059	Intellectual_Disability	ID	15	DOID:1192	Peripheral_Nervous_System_Neoplasm	PNSN	17	-0.130882	.	YES	-0.141977	0.887098	Smaller	.	0.741221
DOID:1059	Intellectual_Disability	ID	15	DOID:3620	Central_Nervous_System_Cancer	CNSC	22	-0.112039	.	YES	-0.0773633	0.938335	Smaller	.	0.805432
DOID:1059	Intellectual_Disability	ID	15	DOID:3119	Gastrointestinal_System_Cancer	GISC	125	0.129143	YES	.	0.0418844	0.966591	larger	.	0.805432
DOID:1059	Intellectual_Disability	ID	15	DOID:1612	Breast_Cancer	BC	104	0.0960892	YES	.	0.00256878	0.99795	larger	.	0.805432
DOID:1059	Intellectual_Disability	ID	15	DOID:1059	Intellectual_Disability	ID	15	0	.	.	0	1	larger	.	1
DOID:1059	Intellectual_Disability	ID	15	DOID:6270	Gastric_Cardia_Carcinoma	GCCA	1	.	.	.	.	.	.	.	NA
DOID:1059	Intellectual_Disability	ID	15	DOID:10540	Gastric_Lymphoma	GLC	1	.	.	.	.	.	.	.	NA
DOID:1059	Intellectual_Disability	ID	15	DOID:3328	Temporal_Lobe_Epilepsy	TLE	1	.	.	.	.	.	.	.	NA
DOID:3070	Malignant_Glioma	MG	43	DOID:3070	Malignant_Glioma	MG	43	0	.	.	0	1	larger	.	1
DOID:1909	Melanoma	MEL	50	DOID:1749	Squamous_Cell_Carcinoma	SCC	51	-0.643296	.	YES	-4.49467	6.97e-06	Smaller	**	2.5e-05
DOID:1909	Melanoma	MEL	50	DOID:3070	Malignant_Glioma	MG	43	-0.657384	.	YES	-4.4089	1.04e-05	Smaller	**	2.5e-05
DOID:1909	Melanoma	MEL	50	DOID:5517	Stomach_Carcinoma	SCA	18	-0.548105	.	YES	-4.00719	6.14e-05	Smaller	*	8.97e-05
DOID:1909	Melanoma	MEL	50	DOID:219	Colon_Cancer	HCNC	46	-0.539837	.	YES	-3.45371	0.000552927	Smaller	.	0.000688404
DOID:1909	Melanoma	MEL	50	DOID:3093	Nervous_System_Cancer	NSC	42	-0.535631	.	YES	-3.24421	0.00117777	Smaller	.	0.00137889
DOID:1909	Melanoma	MEL	50	DOID:3119	Gastrointestinal_System_Cancer	GISC	125	-0.445143	.	YES	-3.08491	0.00203612	Smaller	.	0.0026055
DOID:1909	Melanoma	MEL	50	DOID:684	Hepatocellular_Carcinoma	HCC	65	-0.506957	.	YES	-3.02072	0.0025217	Smaller	.	0.0026055
DOID:1909	Melanoma	MEL	50	DOID:10534	Stomach_Cancer	SC	166	-0.392479	.	YES	-2.95563	0.00312029	Smaller	.	0.00344828
DOID:1909	Melanoma	MEL	50	DOID:1192	Peripheral_Nervous_System_Neoplasm	PNSN	17	-0.23633	.	YES	-1.48326	0.138005	Smaller	.	0.129115
DOID:1909	Melanoma	MEL	50	DOID:2621	Autonomic_Nervous_System_Neoplasm	ANSN	14	-0.162411	.	YES	-1.25528	0.209377	Smaller	.	0.183347
DOID:1909	Melanoma	MEL	50	DOID:769	NeuroBlastoma	NB	14	-0.162411	.	YES	-1.12291	0.261474	Smaller	.	0.216361
DOID:1909	Melanoma	MEL	50	DOID:3620	Central_Nervous_System_Cancer	CNSC	22	-0.228586	.	YES	-1.05496	0.291444	Smaller	.	0.252978
DOID:1909	Melanoma	MEL	50	DOID:3717	Gastric_Adenocarcinoma	GAC	7	-0.0197494	.	YES	-0.955133	0.339511	Smaller	.	0.294184
DOID:1909	Melanoma	MEL	50	DOID:2234	Focal_Epilepsy	FEpi	2	0.0338462	YES	.	-0.838005	0.402028	Smaller	.	0.3382
DOID:1909	Melanoma	MEL	50	DOID:1909	Melanoma	MEL	50	0	.	.	0	1	larger	.	1
DOID:1909	Melanoma	MEL	50	DOID:6270	Gastric_Cardia_Carcinoma	GCCA	1	.	.	.	.	.	.	.	NA
DOID:1909	Melanoma	MEL	50	DOID:10540	Gastric_Lymphoma	GLC	1	.	.	.	.	.	.	.	NA
DOID:1909	Melanoma	MEL	50	DOID:3328	Temporal_Lobe_Epilepsy	TLE	1	.	.	.	.	.	.	.	NA
DOID:3093	Nervous_System_Cancer	NSC	42	DOID:3620	Central_Nervous_System_Cancer	CNSC	22	-0.806751	.	YES	-5.47826	4.3e-08	Smaller	***	0
DOID:3093	Nervous_System_Cancer	NSC	42	DOID:10534	Stomach_Cancer	SC	166	-0.388601	.	YES	-3.64075	0.000271849	Smaller	.	0.00036089
DOID:3093	Nervous_System_Cancer	NSC	42	DOID:5517	Stomach_Carcinoma	SCA	18	-0.476984	.	YES	-3.14042	0.00168703	Smaller	.	0.00191293
DOID:3093	Nervous_System_Cancer	NSC	42	DOID:3070	Malignant_Glioma	MG	43	-0.494297	.	YES	-2.78698	0.00532014	Smaller	.	0.00613305
DOID:3093	Nervous_System_Cancer	NSC	42	DOID:3119	Gastrointestinal_System_Cancer	GISC	125	-0.338451	.	YES	-2.15781	0.0309429	Smaller	.	0.0291779
DOID:3093	Nervous_System_Cancer	NSC	42	DOID:3717	Gastric_Adenocarcinoma	GAC	7	-0.0323129	.	YES	-0.824146	0.409857	Smaller	.	0.3382
DOID:3093	Nervous_System_Cancer	NSC	42	DOID:3093	Nervous_System_Cancer	NSC	42	0	.	.	0	1	larger	.	1
DOID:3093	Nervous_System_Cancer	NSC	42	DOID:6270	Gastric_Cardia_Carcinoma	GCCA	1	.	.	.	.	.	.	.	NA
DOID:3093	Nervous_System_Cancer	NSC	42	DOID:10540	Gastric_Lymphoma	GLC	1	.	.	.	.	.	.	.	NA
DOID:769	NeuroBlastoma	NB	14	DOID:2621	Autonomic_Nervous_System_Neoplasm	ANSN	14	-1.42857	.	YES	-7.34809	2.01e-13	Smaller	***	0
DOID:769	NeuroBlastoma	NB	14	DOID:1192	Peripheral_Nervous_System_Neoplasm	PNSN	17	-1.25888	.	YES	-6.31928	2.63e-10	Smaller	***	0
DOID:769	NeuroBlastoma	NB	14	DOID:3093	Nervous_System_Cancer	NSC	42	-0.547619	.	YES	-3.68611	0.000227712	Smaller	.	0.00036089
DOID:769	NeuroBlastoma	NB	14	DOID:5517	Stomach_Carcinoma	SCA	18	-0.592758	.	YES	-2.8861	0.00390044	Smaller	.	0.00458518
DOID:769	NeuroBlastoma	NB	14	DOID:3070	Malignant_Glioma	MG	43	-0.248557	.	YES	-1.5776	0.114658	Smaller	.	0.106771
DOID:769	NeuroBlastoma	NB	14	DOID:3717	Gastric_Adenocarcinoma	GAC	7	-0.214286	.	YES	-0.750372	0.45303	Smaller	.	0.387709
DOID:769	NeuroBlastoma	NB	14	DOID:3620	Central_Nervous_System_Cancer	CNSC	22	-0.21176	.	YES	-0.710258	0.477544	Smaller	.	0.387709
DOID:769	NeuroBlastoma	NB	14	DOID:10534	Stomach_Cancer	SC	166	0.219717	YES	.	0.334754	0.737811	larger	.	0.614436
DOID:769	NeuroBlastoma	NB	14	DOID:3119	Gastrointestinal_System_Cancer	GISC	125	0.139009	YES	.	-0.00341149	0.997278	Smaller	.	0.805432
DOID:769	NeuroBlastoma	NB	14	DOID:769	NeuroBlastoma	NB	14	0	.	.	0	1	larger	.	1
DOID:769	NeuroBlastoma	NB	14	DOID:6270	Gastric_Cardia_Carcinoma	GCCA	1	.	.	.	.	.	.	.	NA
DOID:769	NeuroBlastoma	NB	14	DOID:10540	Gastric_Lymphoma	GLC	1	.	.	.	.	.	.	.	NA
DOID:14330	Parkinson's_disease	PD	28	DOID:1749	Squamous_Cell_Carcinoma	SCC	51	-0.392538	.	YES	-2.22868	0.0258349	Smaller	.	0.0228905
DOID:14330	Parkinson's_disease	PD	28	DOID:1612	Breast_Cancer	BC	104	-0.22003	.	YES	-1.66799	0.0953185	Smaller	.	0.087905
DOID:14330	Parkinson's_disease	PD	28	DOID:3093	Nervous_System_Cancer	NSC	42	-0.347619	.	YES	-1.63214	0.10265	Smaller	.	0.087905
DOID:14330	Parkinson's_disease	PD	28	DOID:3119	Gastrointestinal_System_Cancer	GISC	125	-0.18603	.	YES	-1.52744	0.126652	Smaller	.	0.106771
DOID:14330	Parkinson's_disease	PD	28	DOID:10534	Stomach_Cancer	SC	166	-0.126888	.	YES	-1.37754	0.168347	Smaller	.	0.154545
DOID:14330	Parkinson's_disease	PD	28	DOID:5517	Stomach_Carcinoma	SCA	18	-0.30452	.	YES	-1.36049	0.173673	Smaller	.	0.154545
DOID:14330	Parkinson's_disease	PD	28	DOID:1909	Melanoma	MEL	50	-0.287582	.	YES	-1.33711	0.181186	Smaller	.	0.154545
DOID:14330	Parkinson's_disease	PD	28	DOID:219	Colon_Cancer	HCNC	46	-0.289407	.	YES	-1.25446	0.209673	Smaller	.	0.183347
DOID:14330	Parkinson's_disease	PD	28	DOID:3620	Central_Nervous_System_Cancer	CNSC	22	-0.277792	.	YES	-1.06317	0.287704	Smaller	.	0.252978
DOID:14330	Parkinson's_disease	PD	28	DOID:9255	Frontotemporal_dementia	FTD	11	-0.206044	.	YES	-0.984512	0.324864	Smaller	.	0.294184
DOID:14330	Parkinson's_disease	PD	28	DOID:684	Hepatocellular_Carcinoma	HCC	65	-0.206375	.	YES	-0.82735	0.408039	Smaller	.	0.3382
DOID:14330	Parkinson's_disease	PD	28	DOID:3070	Malignant_Glioma	MG	43	-0.221527	.	YES	-0.628207	0.529868	Smaller	.	0.439556
DOID:14330	Parkinson's_disease	PD	28	DOID:1192	Peripheral_Nervous_System_Neoplasm	PNSN	17	-0.171755	.	YES	-0.513172	0.607831	Smaller	.	0.49472
DOID:14330	Parkinson's_disease	PD	28	DOID:2234	Focal_Epilepsy	FEpi	2	0.0452381	YES	.	-0.445465	0.655984	Smaller	.	0.554217
DOID:14330	Parkinson's_disease	PD	28	DOID:2621	Autonomic_Nervous_System_Neoplasm	ANSN	14	-0.130952	.	YES	-0.439349	0.660409	Smaller	.	0.554217
DOID:14330	Parkinson's_disease	PD	28	DOID:769	NeuroBlastoma	NB	14	-0.130952	.	YES	-0.309433	0.756992	Smaller	.	0.614436
DOID:14330	Parkinson's_disease	PD	28	DOID:3717	Gastric_Adenocarcinoma	GAC	7	0.0785714	YES	.	0.190484	0.84893	larger	.	0.741221
DOID:14330	Parkinson's_disease	PD	28	DOID:14330	Parkinson's_disease	PD	28	0	.	.	0	1	larger	.	1
DOID:14330	Parkinson's_disease	PD	28	DOID:6270	Gastric_Cardia_Carcinoma	GCCA	1	.	.	.	.	.	.	.	NA
DOID:14330	Parkinson's_disease	PD	28	DOID:10540	Gastric_Lymphoma	GLC	1	.	.	.	.	.	.	.	NA
DOID:14330	Parkinson's_disease	PD	28	DOID:3328	Temporal_Lobe_Epilepsy	TLE	1	.	.	.	.	.	.	.	NA
DOID:1192	Peripheral_Nervous_System_Neoplasm	PNSN	17	DOID:3093	Nervous_System_Cancer	NSC	42	-0.682678	.	YES	-4.54676	5.45e-06	Smaller	**	1.04e-05
DOID:1192	Peripheral_Nervous_System_Neoplasm	PNSN	17	DOID:5517	Stomach_Carcinoma	SCA	18	-0.54239	.	YES	-2.56275	0.0103847	Smaller	.	0.0104763
DOID:1192	Peripheral_Nervous_System_Neoplasm	PNSN	17	DOID:3070	Malignant_Glioma	MG	43	-0.362084	.	YES	-2.29214	0.0218976	Smaller	.	0.0228905
DOID:1192	Peripheral_Nervous_System_Neoplasm	PNSN	17	DOID:3620	Central_Nervous_System_Cancer	CNSC	22	-0.239682	.	YES	-0.833407	0.404615	Smaller	.	0.3382
DOID:1192	Peripheral_Nervous_System_Neoplasm	PNSN	17	DOID:3717	Gastric_Adenocarcinoma	GAC	7	-0.19993	.	YES	-0.820275	0.412059	Smaller	.	0.3382
DOID:1192	Peripheral_Nervous_System_Neoplasm	PNSN	17	DOID:3119	Gastrointestinal_System_Cancer	GISC	125	0.0759768	YES	.	-0.165227	0.868765	Smaller	.	0.741221
DOID:1192	Peripheral_Nervous_System_Neoplasm	PNSN	17	DOID:10534	Stomach_Cancer	SC	166	0.138594	YES	.	-3e-05	0.999976	Smaller	.	0.805432
DOID:1192	Peripheral_Nervous_System_Neoplasm	PNSN	17	DOID:1192	Peripheral_Nervous_System_Neoplasm	PNSN	17	0	.	.	0	1	larger	.	1
DOID:1192	Peripheral_Nervous_System_Neoplasm	PNSN	17	DOID:6270	Gastric_Cardia_Carcinoma	GCCA	1	.	.	.	.	.	.	.	NA
DOID:1192	Peripheral_Nervous_System_Neoplasm	PNSN	17	DOID:10540	Gastric_Lymphoma	GLC	1	.	.	.	.	.	.	.	NA
DOID:5419	Schizophrenia	SCH	54	DOID:10534	Stomach_Cancer	SC	166	-0.506738	.	YES	-4.24966	2.14e-05	Smaller	**	4.17e-05
DOID:5419	Schizophrenia	SCH	54	DOID:1059	Intellectual_Disability	ID	15	0.208052	YES	.	1.77055	0.0766349	larger	.	0.0718213
DOID:5419	Schizophrenia	SCH	54	DOID:9255	Frontotemporal_dementia	FTD	11	-0.152707	.	YES	-1.57066	0.116261	Smaller	.	0.106771
DOID:5419	Schizophrenia	SCH	54	DOID:684	Hepatocellular_Carcinoma	HCC	65	-0.364083	.	YES	-1.40238	0.160801	Smaller	.	0.129115
DOID:5419	Schizophrenia	SCH	54	DOID:1909	Melanoma	MEL	50	-0.345783	.	YES	-1.29965	0.193722	Smaller	.	0.183347
DOID:5419	Schizophrenia	SCH	54	DOID:219	Colon_Cancer	HCNC	46	-0.335717	.	YES	-1.29918	0.193881	Smaller	.	0.183347
DOID:5419	Schizophrenia	SCH	54	DOID:3070	Malignant_Glioma	MG	43	-0.33102	.	YES	-1.29217	0.196299	Smaller	.	0.183347
DOID:5419	Schizophrenia	SCH	54	DOID:3119	Gastrointestinal_System_Cancer	GISC	125	-0.319641	.	YES	-1.24532	0.213013	Smaller	.	0.183347
DOID:5419	Schizophrenia	SCH	54	DOID:3093	Nervous_System_Cancer	NSC	42	-0.315642	.	YES	-1.22588	0.220246	Smaller	.	0.183347
DOID:5419	Schizophrenia	SCH	54	DOID:1826	Epilepsy_syndrome	Epi	18	-0.185185	.	YES	-1.19917	0.230464	Smaller	.	0.216361
DOID:5419	Schizophrenia	SCH	54	DOID:14330	Parkinson's_disease	PD	28	-0.268131	.	YES	-1.18343	0.236638	Smaller	.	0.216361
DOID:5419	Schizophrenia	SCH	54	DOID:5517	Stomach_Carcinoma	SCA	18	-0.171296	.	YES	-1.00253	0.316088	Smaller	.	0.252978
DOID:5419	Schizophrenia	SCH	54	DOID:1612	Breast_Cancer	BC	104	-0.307575	.	YES	-0.824565	0.409618	Smaller	.	0.3382
DOID:5419	Schizophrenia	SCH	54	DOID:3620	Central_Nervous_System_Cancer	CNSC	22	-0.16073	.	YES	-0.604312	0.545636	Smaller	.	0.439556
DOID:5419	Schizophrenia	SCH	54	DOID:1749	Squamous_Cell_Carcinoma	SCC	51	-0.276688	.	YES	-0.576835	0.564051	Smaller	.	0.49472
DOID:5419	Schizophrenia	SCH	54	DOID:2621	Autonomic_Nervous_System_Neoplasm	ANSN	14	-0.0350918	.	YES	-0.420712	0.673965	Smaller	.	0.554217
DOID:5419	Schizophrenia	SCH	54	DOID:1192	Peripheral_Nervous_System_Neoplasm	PNSN	17	-0.0819909	.	YES	-0.348724	0.727296	Smaller	.	0.614436
DOID:5419	Schizophrenia	SCH	54	DOID:10763	Hypertension	HTN	22	-0.130826	.	YES	-0.326967	0.743693	Smaller	.	0.614436
DOID:5419	Schizophrenia	SCH	54	DOID:12858	Huntington's_disease	HD	5	0.285625	YES	.	0.325382	0.744892	larger	.	0.614436
DOID:5419	Schizophrenia	SCH	54	DOID:769	NeuroBlastoma	NB	14	-0.0350918	.	YES	-0.25099	0.801822	Smaller	.	0.677821
DOID:5419	Schizophrenia	SCH	54	DOID:3717	Gastric_Adenocarcinoma	GAC	7	0.191213	YES	.	0.198836	0.842391	larger	.	0.741221
DOID:5419	Schizophrenia	SCH	54	DOID:2234	Focal_Epilepsy	FEpi	2	0.281085	YES	.	-0.127215	0.89877	Smaller	.	0.741221
DOID:5419	Schizophrenia	SCH	54	DOID:0060041	Autism_Spectrum_Disorder	ASD	10	0.0797454	YES	.	0.0123497	0.990147	larger	.	0.805432
DOID:5419	Schizophrenia	SCH	54	DOID:5419	Schizophrenia	SCH	54	0	.	.	0	1	larger	.	1
DOID:5419	Schizophrenia	SCH	54	DOID:6270	Gastric_Cardia_Carcinoma	GCCA	1	.	.	.	.	.	.	.	NA
DOID:5419	Schizophrenia	SCH	54	DOID:10540	Gastric_Lymphoma	GLC	1	.	.	.	.	.	.	.	NA
DOID:5419	Schizophrenia	SCH	54	DOID:3328	Temporal_Lobe_Epilepsy	TLE	1	.	.	.	.	.	.	.	NA
DOID:1749	Squamous_Cell_Carcinoma	SCC	51	DOID:3119	Gastrointestinal_System_Cancer	GISC	125	-0.58415	.	YES	-4.85368	1.21e-06	Smaller	***	2.09e-06
DOID:1749	Squamous_Cell_Carcinoma	SCC	51	DOID:5517	Stomach_Carcinoma	SCA	18	-0.57218	.	YES	-4.12004	3.79e-05	Smaller	*	5.84e-05
DOID:1749	Squamous_Cell_Carcinoma	SCC	51	DOID:10534	Stomach_Cancer	SC	166	-0.473706	.	YES	-3.96886	7.22e-05	Smaller	*	0.000118906
DOID:1749	Squamous_Cell_Carcinoma	SCC	51	DOID:219	Colon_Cancer	HCNC	46	-0.563352	.	YES	-3.63773	0.000275054	Smaller	.	0.00036089
DOID:1749	Squamous_Cell_Carcinoma	SCC	51	DOID:3093	Nervous_System_Cancer	NSC	42	-0.516874	.	YES	-3.07369	0.00211431	Smaller	.	0.0026055
DOID:1749	Squamous_Cell_Carcinoma	SCC	51	DOID:3070	Malignant_Glioma	MG	43	-0.509998	.	YES	-2.87934	0.00398513	Smaller	.	0.00458518
DOID:1749	Squamous_Cell_Carcinoma	SCC	51	DOID:3620	Central_Nervous_System_Cancer	CNSC	22	-0.297121	.	YES	-1.6995	0.0892246	Smaller	.	0.087905
DOID:1749	Squamous_Cell_Carcinoma	SCC	51	DOID:2621	Autonomic_Nervous_System_Neoplasm	ANSN	14	-0.207498	.	YES	-1.59042	0.111739	Smaller	.	0.106771
DOID:1749	Squamous_Cell_Carcinoma	SCC	51	DOID:769	NeuroBlastoma	NB	14	-0.207498	.	YES	-1.42664	0.153684	Smaller	.	0.129115
DOID:1749	Squamous_Cell_Carcinoma	SCC	51	DOID:1192	Peripheral_Nervous_System_Neoplasm	PNSN	17	-0.205882	.	YES	-1.27444	0.202506	Smaller	.	0.183347
DOID:1749	Squamous_Cell_Carcinoma	SCC	51	DOID:3717	Gastric_Adenocarcinoma	GAC	7	0.0499855	YES	.	-0.580538	0.561552	Smaller	.	0.49472
DOID:1749	Squamous_Cell_Carcinoma	SCC	51	DOID:2234	Focal_Epilepsy	FEpi	2	0.13596	YES	.	-0.537069	0.59122	Smaller	.	0.49472
DOID:1749	Squamous_Cell_Carcinoma	SCC	51	DOID:1749	Squamous_Cell_Carcinoma	SCC	51	0	.	.	0	1	larger	.	1
DOID:1749	Squamous_Cell_Carcinoma	SCC	51	DOID:6270	Gastric_Cardia_Carcinoma	GCCA	1	.	.	.	.	.	.	.	NA
DOID:1749	Squamous_Cell_Carcinoma	SCC	51	DOID:10540	Gastric_Lymphoma	GLC	1	.	.	.	.	.	.	.	NA
DOID:1749	Squamous_Cell_Carcinoma	SCC	51	DOID:3328	Temporal_Lobe_Epilepsy	TLE	1	.	.	.	.	.	.	.	NA
DOID:10534	Stomach_Cancer	SC	166	DOID:3119	Gastrointestinal_System_Cancer	GISC	125	-0.89016	.	YES	-9.23553	2.57e-20	Smaller	***	0
DOID:10534	Stomach_Cancer	SC	166	DOID:3070	Malignant_Glioma	MG	43	-0.3676	.	YES	-3.12998	0.0017482	Smaller	.	0.00191293
DOID:10534	Stomach_Cancer	SC	166	DOID:5517	Stomach_Carcinoma	SCA	18	0.0278433	YES	.	-0.986795	0.323743	Smaller	.	0.294184
DOID:10534	Stomach_Cancer	SC	166	DOID:3717	Gastric_Adenocarcinoma	GAC	7	0.386599	YES	.	0.269792	0.78732	larger	.	0.677821
DOID:10534	Stomach_Cancer	SC	166	DOID:10534	Stomach_Cancer	SC	166	0	.	.	0	1	larger	.	1
DOID:10534	Stomach_Cancer	SC	166	DOID:6270	Gastric_Cardia_Carcinoma	GCCA	1	.	.	.	.	.	.	.	NA
DOID:10534	Stomach_Cancer	SC	166	DOID:10540	Gastric_Lymphoma	GLC	1	.	.	.	.	.	.	.	NA
DOID:5517	Stomach_Carcinoma	SCA	18	DOID:3717	Gastric_Adenocarcinoma	GAC	7	-0.667937	.	YES	-3.14746	0.00164695	Smaller	.	0.00191293
DOID:5517	Stomach_Carcinoma	SCA	18	DOID:3070	Malignant_Glioma	MG	43	-0.460118	.	YES	-2.95909	0.00308552	Smaller	.	0.00344828
DOID:5517	Stomach_Carcinoma	SCA	18	DOID:5517	Stomach_Carcinoma	SCA	18	0	.	.	0	1	larger	.	1
DOID:5517	Stomach_Carcinoma	SCA	18	DOID:6270	Gastric_Cardia_Carcinoma	GCCA	1	.	.	.	.	.	.	.	NA
DOID:5517	Stomach_Carcinoma	SCA	18	DOID:10540	Gastric_Lymphoma	GLC	1	.	.	.	.	.	.	.	NA
DOID:3328	Temporal_Lobe_Epilepsy	TLE	1	DOID:3328	Temporal_Lobe_Epilepsy	TLE	1	0	.	.	0	1	larger	.	1
DOID:3328	Temporal_Lobe_Epilepsy	TLE	1	DOID:2621	Autonomic_Nervous_System_Neoplasm	ANSN	14	.	.	.	.	.	.	.	NA
DOID:3328	Temporal_Lobe_Epilepsy	TLE	1	DOID:3620	Central_Nervous_System_Cancer	CNSC	22	.	.	.	.	.	.	.	NA
DOID:3328	Temporal_Lobe_Epilepsy	TLE	1	DOID:2234	Focal_Epilepsy	FEpi	2	.	.	.	.	.	.	.	NA
DOID:3328	Temporal_Lobe_Epilepsy	TLE	1	DOID:3717	Gastric_Adenocarcinoma	GAC	7	.	.	.	.	.	.	.	NA
DOID:3328	Temporal_Lobe_Epilepsy	TLE	1	DOID:6270	Gastric_Cardia_Carcinoma	GCCA	1	.	.	.	.	.	.	.	NA
DOID:3328	Temporal_Lobe_Epilepsy	TLE	1	DOID:10540	Gastric_Lymphoma	GLC	1	.	.	.	.	.	.	.	NA
DOID:3328	Temporal_Lobe_Epilepsy	TLE	1	DOID:3119	Gastrointestinal_System_Cancer	GISC	125	.	.	.	.	.	.	.	NA
DOID:3328	Temporal_Lobe_Epilepsy	TLE	1	DOID:3070	Malignant_Glioma	MG	43	.	.	.	.	.	.	.	NA
DOID:3328	Temporal_Lobe_Epilepsy	TLE	1	DOID:3093	Nervous_System_Cancer	NSC	42	.	.	.	.	.	.	.	NA
DOID:3328	Temporal_Lobe_Epilepsy	TLE	1	DOID:769	NeuroBlastoma	NB	14	.	.	.	.	.	.	.	NA
DOID:3328	Temporal_Lobe_Epilepsy	TLE	1	DOID:1192	Peripheral_Nervous_System_Neoplasm	PNSN	17	.	.	.	.	.	.	.	NA
DOID:3328	Temporal_Lobe_Epilepsy	TLE	1	DOID:10534	Stomach_Cancer	SC	166	.	.	.	.	.	.	.	NA
DOID:3328	Temporal_Lobe_Epilepsy	TLE	1	DOID:5517	Stomach_Carcinoma	SCA	18	.	.	.	.	.	.	.	NA

## Sheet: P140Cap_syn_PPI_Disease_overlap
HDO.ID	Disease.long	Disease	N	HDO.ID	Disease.long	Disease	N	sAB	Separated	Overlap	zScore	pvalue	Separation/Overlap.than.chance	Bonferroni	q-value
DOID:10652	Alzheimer's_disease	AD	38	DOID:1612	Breast_Cancer	BC	37	-0.0521479	.	YES	1.80123	0.0716673	larger	.	0.0580199
DOID:10652	Alzheimer's_disease	AD	38	DOID:0060041	Autism_Spectrum_Disorder	ASD	23	-0.459992	.	YES	-1.38549	0.165903	Smaller	.	0.152494
DOID:10652	Alzheimer's_disease	AD	38	DOID:1059	Intellectual_Disability	ID	28	-0.508686	.	YES	-1.36142	0.17338	Smaller	.	0.152494
DOID:10652	Alzheimer's_disease	AD	38	DOID:12849	Autistic_disorder	AUT	23	-0.459992	.	YES	-1.2961	0.19494	Smaller	.	0.18086
DOID:10652	Alzheimer's_disease	AD	38	DOID:5419	Schizophrenia	SCH	64	-0.496219	.	YES	-1.26076	0.207397	Smaller	.	0.18086
DOID:10652	Alzheimer's_disease	AD	38	DOID:1826	Epilepsy_syndrome	Epi	21	-0.421987	.	YES	-1.18054	0.237785	Smaller	.	0.213482
DOID:10652	Alzheimer's_disease	AD	38	DOID:769	NeuroBlastoma	NB	8	-0.207809	.	YES	-1.14192	0.253486	Smaller	.	0.213482
DOID:10652	Alzheimer's_disease	AD	38	DOID:2621	Autonomic_Nervous_System_Neoplasm	ANSN	8	-0.207809	.	YES	-1.10498	0.269167	Smaller	.	0.213482
DOID:10652	Alzheimer's_disease	AD	38	DOID:3312	Bipolar_disorder	BI	26	-0.436488	.	YES	-1.06138	0.288518	Smaller	.	0.249559
DOID:10652	Alzheimer's_disease	AD	38	DOID:1192	Peripheral_Nervous_System_Neoplasm	PNSN	9	-0.191614	.	YES	-0.978136	0.328007	Smaller	.	0.290001
DOID:10652	Alzheimer's_disease	AD	38	DOID:3093	Nervous_System_Cancer	NSC	20	-0.0717332	.	YES	0.76043	0.446998	larger	.	0.383614
DOID:10652	Alzheimer's_disease	AD	38	DOID:3119	Gastrointestinal_System_Cancer	GISC	50	-0.239617	.	YES	0.751527	0.452336	larger	.	0.383614
DOID:10652	Alzheimer's_disease	AD	38	DOID:10534	Stomach_Cancer	SC	102	-0.340358	.	YES	-0.324532	0.745535	Smaller	.	0.611669
DOID:10652	Alzheimer's_disease	AD	38	DOID:2234	Focal_Epilepsy	FEpi	12	-0.132193	.	YES	-0.295587	0.767546	Smaller	.	0.676039
DOID:10652	Alzheimer's_disease	AD	38	DOID:14330	Parkinson's_disease	PD	13	-0.107208	.	YES	-0.106484	0.915198	Smaller	.	0.740295
DOID:10652	Alzheimer's_disease	AD	38	DOID:3328	Temporal_Lobe_Epilepsy	TLE	10	-0.00219298	.	YES	-0.00772984	0.993833	Smaller	.	0.805432
DOID:10652	Alzheimer's_disease	AD	38	DOID:684	Hepatocellular_Carcinoma	HCC	21	0.246294	YES	.	2.67044	0.00757529	larger	.	0.00871769
DOID:10652	Alzheimer's_disease	AD	38	DOID:1909	Melanoma	MEL	20	0.0644737	YES	.	1.48425	0.137742	larger	.	0.126927
DOID:10652	Alzheimer's_disease	AD	38	DOID:10763	Hypertension	HTN	12	0.174474	YES	.	1.17337	0.240646	larger	.	0.213482
DOID:10652	Alzheimer's_disease	AD	38	DOID:3070	Malignant_Glioma	MG	17	0.0269068	YES	.	1.03189	0.302124	larger	.	0.249559
DOID:10652	Alzheimer's_disease	AD	38	DOID:3620	Central_Nervous_System_Cancer	CNSC	10	0.19364	YES	.	0.890215	0.37335	larger	.	0.335265
DOID:10652	Alzheimer's_disease	AD	38	DOID:1749	Squamous_Cell_Carcinoma	SCC	16	0.0163255	YES	.	0.844728	0.398263	larger	.	0.335265
DOID:10652	Alzheimer's_disease	AD	38	DOID:12858	Huntington's_disease	HD	4	0.515664	YES	.	0.755087	0.450197	larger	.	0.383614
DOID:10652	Alzheimer's_disease	AD	38	DOID:5517	Stomach_Carcinoma	SCA	2	0.139474	YES	.	-0.451951	0.651304	Smaller	.	0.551134
DOID:10652	Alzheimer's_disease	AD	38	DOID:219	Colon_Cancer	HCNC	10	0.097807	YES	.	0.41807	0.675896	larger	.	0.551134
DOID:10652	Alzheimer's_disease	AD	38	DOID:9255	Frontotemporal_dementia	FTD	8	0.131865	YES	.	0.247504	0.804518	larger	.	0.676039
DOID:10652	Alzheimer's_disease	AD	38	DOID:10652	Alzheimer's_disease	AD	38	0	.	.	0	1	larger	.	1
DOID:10652	Alzheimer's_disease	AD	38	DOID:6270	Gastric_Cardia_Carcinoma	GCCA	0	0	.	.	0	1	larger	.	1
DOID:10652	Alzheimer's_disease	AD	38	DOID:10540	Gastric_Lymphoma	GLC	0	0	.	.	0	1	larger	.	1
DOID:10652	Alzheimer's_disease	AD	38	DOID:3717	Gastric_Adenocarcinoma	GAC	1	.	.	.	.	.	.	.	NA
DOID:0060041	Autism_Spectrum_Disorder	ASD	23	DOID:1059	Intellectual_Disability	ID	28	-0.752938	.	YES	-2.6047	0.00919554	Smaller	.	0.00871769
DOID:0060041	Autism_Spectrum_Disorder	ASD	23	DOID:769	NeuroBlastoma	NB	8	-0.458713	.	YES	-1.49216	0.135658	Smaller	.	0.126927
DOID:0060041	Autism_Spectrum_Disorder	ASD	23	DOID:2621	Autonomic_Nervous_System_Neoplasm	ANSN	8	-0.458713	.	YES	-1.47399	0.140485	Smaller	.	0.126927
DOID:0060041	Autism_Spectrum_Disorder	ASD	23	DOID:3119	Gastrointestinal_System_Cancer	GISC	50	-0.00207266	.	YES	1.38957	0.164659	larger	.	0.152494
DOID:0060041	Autism_Spectrum_Disorder	ASD	23	DOID:1192	Peripheral_Nervous_System_Neoplasm	PNSN	9	-0.403382	.	YES	-1.26348	0.206416	Smaller	.	0.18086
DOID:0060041	Autism_Spectrum_Disorder	ASD	23	DOID:2234	Focal_Epilepsy	FEpi	12	-0.460921	.	YES	-1.24288	0.213911	Smaller	.	0.18086
DOID:0060041	Autism_Spectrum_Disorder	ASD	23	DOID:3328	Temporal_Lobe_Epilepsy	TLE	10	-0.393281	.	YES	-1.17654	0.239378	Smaller	.	0.213482
DOID:0060041	Autism_Spectrum_Disorder	ASD	23	DOID:1826	Epilepsy_syndrome	Epi	21	-0.433324	.	YES	-1.01795	0.3087	Smaller	.	0.249559
DOID:0060041	Autism_Spectrum_Disorder	ASD	23	DOID:1612	Breast_Cancer	BC	37	-0.136114	.	YES	0.597171	0.550393	larger	.	0.491364
DOID:0060041	Autism_Spectrum_Disorder	ASD	23	DOID:3093	Nervous_System_Cancer	NSC	20	-0.111198	.	YES	0.538414	0.590291	larger	.	0.491364
DOID:0060041	Autism_Spectrum_Disorder	ASD	23	DOID:219	Colon_Cancer	HCNC	10	-0.0508564	.	YES	0.18013	0.857051	larger	.	0.740295
DOID:0060041	Autism_Spectrum_Disorder	ASD	23	DOID:10534	Stomach_Cancer	SC	102	-0.0799437	.	YES	0.156833	0.875377	larger	.	0.740295
DOID:0060041	Autism_Spectrum_Disorder	ASD	23	DOID:14330	Parkinson's_disease	PD	13	-0.144835	.	YES	0.040383	0.967788	larger	.	0.805432
DOID:0060041	Autism_Spectrum_Disorder	ASD	23	DOID:684	Hepatocellular_Carcinoma	HCC	21	0.414079	YES	.	3.19536	0.00139654	larger	.	0.00228216
DOID:0060041	Autism_Spectrum_Disorder	ASD	23	DOID:1749	Squamous_Cell_Carcinoma	SCC	16	0.296405	YES	.	2.32146	0.0202622	larger	.	0.0185869
DOID:0060041	Autism_Spectrum_Disorder	ASD	23	DOID:10763	Hypertension	HTN	12	0.362888	YES	.	2.0355	0.0418005	larger	.	0.0377391
DOID:0060041	Autism_Spectrum_Disorder	ASD	23	DOID:1909	Melanoma	MEL	20	0.0318251	YES	.	1.17819	0.238722	larger	.	0.213482
DOID:0060041	Autism_Spectrum_Disorder	ASD	23	DOID:3070	Malignant_Glioma	MG	17	0.0168798	YES	.	1.09034	0.275563	larger	.	0.249559
DOID:0060041	Autism_Spectrum_Disorder	ASD	23	DOID:9255	Frontotemporal_dementia	FTD	8	0.228787	YES	.	1.05252	0.292559	larger	.	0.249559
DOID:0060041	Autism_Spectrum_Disorder	ASD	23	DOID:3620	Central_Nervous_System_Cancer	CNSC	10	0.103689	YES	.	0.872333	0.383027	larger	.	0.335265
DOID:0060041	Autism_Spectrum_Disorder	ASD	23	DOID:12858	Huntington's_disease	HD	4	0.309581	YES	.	0.544607	0.586024	larger	.	0.491364
DOID:0060041	Autism_Spectrum_Disorder	ASD	23	DOID:5517	Stomach_Carcinoma	SCA	2	0.0121739	YES	.	-0.390551	0.696129	Smaller	.	0.611669
DOID:0060041	Autism_Spectrum_Disorder	ASD	23	DOID:0060041	Autism_Spectrum_Disorder	ASD	23	0	.	.	0	1	larger	.	1
DOID:0060041	Autism_Spectrum_Disorder	ASD	23	DOID:6270	Gastric_Cardia_Carcinoma	GCCA	0	0	.	.	0	1	larger	.	1
DOID:0060041	Autism_Spectrum_Disorder	ASD	23	DOID:10540	Gastric_Lymphoma	GLC	0	0	.	.	0	1	larger	.	1
DOID:0060041	Autism_Spectrum_Disorder	ASD	23	DOID:3717	Gastric_Adenocarcinoma	GAC	1	.	.	.	.	.	.	.	NA
DOID:12849	Autistic_disorder	AUT	23	DOID:0060041	Autism_Spectrum_Disorder	ASD	23	-1.69565	.	YES	-7.22028	5.19e-13	Smaller	***	0
DOID:12849	Autistic_disorder	AUT	23	DOID:1059	Intellectual_Disability	ID	28	-0.752938	.	YES	-2.63058	0.00852382	Smaller	.	0.00871769
DOID:12849	Autistic_disorder	AUT	23	DOID:769	NeuroBlastoma	NB	8	-0.458713	.	YES	-1.50775	0.131619	Smaller	.	0.105628
DOID:12849	Autistic_disorder	AUT	23	DOID:2621	Autonomic_Nervous_System_Neoplasm	ANSN	8	-0.458713	.	YES	-1.4899	0.136249	Smaller	.	0.126927
DOID:12849	Autistic_disorder	AUT	23	DOID:5419	Schizophrenia	SCH	64	-0.392815	.	YES	-1.44516	0.148414	Smaller	.	0.126927
DOID:12849	Autistic_disorder	AUT	23	DOID:3119	Gastrointestinal_System_Cancer	GISC	50	-0.00207266	.	YES	1.3651	0.172222	larger	.	0.152494
DOID:12849	Autistic_disorder	AUT	23	DOID:1192	Peripheral_Nervous_System_Neoplasm	PNSN	9	-0.403382	.	YES	-1.25802	0.208385	Smaller	.	0.18086
DOID:12849	Autistic_disorder	AUT	23	DOID:2234	Focal_Epilepsy	FEpi	12	-0.460921	.	YES	-1.23776	0.215807	Smaller	.	0.18086
DOID:12849	Autistic_disorder	AUT	23	DOID:3328	Temporal_Lobe_Epilepsy	TLE	10	-0.393281	.	YES	-1.15322	0.248819	Smaller	.	0.213482
DOID:12849	Autistic_disorder	AUT	23	DOID:1826	Epilepsy_syndrome	Epi	21	-0.433324	.	YES	-1.00844	0.313242	Smaller	.	0.249559
DOID:12849	Autistic_disorder	AUT	23	DOID:3093	Nervous_System_Cancer	NSC	20	-0.111198	.	YES	0.558045	0.576814	larger	.	0.491364
DOID:12849	Autistic_disorder	AUT	23	DOID:1612	Breast_Cancer	BC	37	-0.136114	.	YES	0.556325	0.577989	larger	.	0.491364
DOID:12849	Autistic_disorder	AUT	23	DOID:219	Colon_Cancer	HCNC	10	-0.0508564	.	YES	0.190219	0.849138	larger	.	0.740295
DOID:12849	Autistic_disorder	AUT	23	DOID:10534	Stomach_Cancer	SC	102	-0.0799437	.	YES	0.119705	0.904717	larger	.	0.740295
DOID:12849	Autistic_disorder	AUT	23	DOID:14330	Parkinson's_disease	PD	13	-0.144835	.	YES	0.0320708	0.974416	larger	.	0.805432
DOID:12849	Autistic_disorder	AUT	23	DOID:684	Hepatocellular_Carcinoma	HCC	21	0.414079	YES	.	3.09522	0.0019667	larger	.	0.00293927
DOID:12849	Autistic_disorder	AUT	23	DOID:1749	Squamous_Cell_Carcinoma	SCC	16	0.296405	YES	.	2.26894	0.0232722	larger	.	0.0236435
DOID:12849	Autistic_disorder	AUT	23	DOID:10763	Hypertension	HTN	12	0.362888	YES	.	2.09034	0.0365875	larger	.	0.0377391
DOID:12849	Autistic_disorder	AUT	23	DOID:1909	Melanoma	MEL	20	0.0318251	YES	.	1.2778	0.201321	larger	.	0.18086
DOID:12849	Autistic_disorder	AUT	23	DOID:3070	Malignant_Glioma	MG	17	0.0168798	YES	.	1.12621	0.260078	larger	.	0.213482
DOID:12849	Autistic_disorder	AUT	23	DOID:9255	Frontotemporal_dementia	FTD	8	0.228787	YES	.	0.998758	0.317912	larger	.	0.290001
DOID:12849	Autistic_disorder	AUT	23	DOID:3620	Central_Nervous_System_Cancer	CNSC	10	0.103689	YES	.	0.830793	0.40609	larger	.	0.335265
DOID:12849	Autistic_disorder	AUT	23	DOID:12858	Huntington's_disease	HD	4	0.309581	YES	.	0.542228	0.587661	larger	.	0.491364
DOID:12849	Autistic_disorder	AUT	23	DOID:5517	Stomach_Carcinoma	SCA	2	0.0121739	YES	.	-0.387115	0.698671	Smaller	.	0.611669
DOID:12849	Autistic_disorder	AUT	23	DOID:12849	Autistic_disorder	AUT	23	0	.	.	0	1	larger	.	1
DOID:12849	Autistic_disorder	AUT	23	DOID:6270	Gastric_Cardia_Carcinoma	GCCA	0	0	.	.	0	1	larger	.	1
DOID:12849	Autistic_disorder	AUT	23	DOID:10540	Gastric_Lymphoma	GLC	0	0	.	.	0	1	larger	.	1
DOID:12849	Autistic_disorder	AUT	23	DOID:3717	Gastric_Adenocarcinoma	GAC	1	.	.	.	.	.	.	.	NA
DOID:2621	Autonomic_Nervous_System_Neoplasm	ANSN	8	DOID:1192	Peripheral_Nervous_System_Neoplasm	PNSN	9	-2.00041	.	YES	-5.34724	8.93e-08	Smaller	***	3.96e-05
DOID:2621	Autonomic_Nervous_System_Neoplasm	ANSN	8	DOID:3093	Nervous_System_Cancer	NSC	20	-0.980357	.	YES	-3.2198	0.00128281	Smaller	.	0.00176899
DOID:2621	Autonomic_Nervous_System_Neoplasm	ANSN	8	DOID:3620	Central_Nervous_System_Cancer	CNSC	10	-0.706944	.	YES	-1.62186	0.104834	Smaller	.	0.0867806
DOID:2621	Autonomic_Nervous_System_Neoplasm	ANSN	8	DOID:10534	Stomach_Cancer	SC	102	-0.00661765	.	YES	-1.51673	0.129336	Smaller	.	0.105628
DOID:2621	Autonomic_Nervous_System_Neoplasm	ANSN	8	DOID:5517	Stomach_Carcinoma	SCA	2	-0.9625	.	YES	-1.50366	0.132669	Smaller	.	0.105628
DOID:2621	Autonomic_Nervous_System_Neoplasm	ANSN	8	DOID:3119	Gastrointestinal_System_Cancer	GISC	50	-0.148017	.	YES	-1.19145	0.233475	Smaller	.	0.213482
DOID:2621	Autonomic_Nervous_System_Neoplasm	ANSN	8	DOID:3070	Malignant_Glioma	MG	17	-0.197794	.	YES	-0.292961	0.769552	Smaller	.	0.676039
DOID:2621	Autonomic_Nervous_System_Neoplasm	ANSN	8	DOID:2621	Autonomic_Nervous_System_Neoplasm	ANSN	8	0	.	.	0	1	larger	.	1
DOID:2621	Autonomic_Nervous_System_Neoplasm	ANSN	8	DOID:6270	Gastric_Cardia_Carcinoma	GCCA	0	0	.	.	0	1	larger	.	1
DOID:2621	Autonomic_Nervous_System_Neoplasm	ANSN	8	DOID:10540	Gastric_Lymphoma	GLC	0	0	.	.	0	1	larger	.	1
DOID:2621	Autonomic_Nervous_System_Neoplasm	ANSN	8	DOID:3717	Gastric_Adenocarcinoma	GAC	1	.	.	.	.	.	.	.	NA
DOID:3312	Bipolar_disorder	BI	26	DOID:12849	Autistic_disorder	AUT	23	-0.636288	.	YES	-2.07045	0.0384104	Smaller	.	0.0377391
DOID:3312	Bipolar_disorder	BI	26	DOID:0060041	Autism_Spectrum_Disorder	ASD	23	-0.636288	.	YES	-2.00668	0.0447835	Smaller	.	0.0377391
DOID:3312	Bipolar_disorder	BI	26	DOID:5419	Schizophrenia	SCH	64	-0.436899	.	YES	-1.47435	0.140386	Smaller	.	0.126927
DOID:3312	Bipolar_disorder	BI	26	DOID:3119	Gastrointestinal_System_Cancer	GISC	50	-0.0268826	.	YES	1.41611	0.156745	larger	.	0.126927
DOID:3312	Bipolar_disorder	BI	26	DOID:1059	Intellectual_Disability	ID	28	-0.445208	.	YES	-0.994047	0.3202	Smaller	.	0.290001
DOID:3312	Bipolar_disorder	BI	26	DOID:2234	Focal_Epilepsy	FEpi	12	-0.251181	.	YES	-0.526925	0.598245	Smaller	.	0.491364
DOID:3312	Bipolar_disorder	BI	26	DOID:14330	Parkinson's_disease	PD	13	-0.0448718	.	YES	0.428991	0.66793	larger	.	0.551134
DOID:3312	Bipolar_disorder	BI	26	DOID:1826	Epilepsy_syndrome	Epi	21	-0.307712	.	YES	-0.407493	0.683646	Smaller	.	0.551134
DOID:3312	Bipolar_disorder	BI	26	DOID:1749	Squamous_Cell_Carcinoma	SCC	16	-0.103938	.	YES	0.390499	0.696168	larger	.	0.611669
DOID:3312	Bipolar_disorder	BI	26	DOID:769	NeuroBlastoma	NB	8	-0.115667	.	YES	-0.365122	0.715021	Smaller	.	0.611669
DOID:3312	Bipolar_disorder	BI	26	DOID:10534	Stomach_Cancer	SC	102	-0.106017	.	YES	0.339996	0.73386	larger	.	0.611669
DOID:3312	Bipolar_disorder	BI	26	DOID:2621	Autonomic_Nervous_System_Neoplasm	ANSN	8	-0.115667	.	YES	-0.293712	0.768978	Smaller	.	0.676039
DOID:3312	Bipolar_disorder	BI	26	DOID:3070	Malignant_Glioma	MG	17	-0.151663	.	YES	0.242034	0.808754	larger	.	0.676039
DOID:3312	Bipolar_disorder	BI	26	DOID:1192	Peripheral_Nervous_System_Neoplasm	PNSN	9	-0.10116	.	YES	-0.21032	0.833418	Smaller	.	0.676039
DOID:3312	Bipolar_disorder	BI	26	DOID:3328	Temporal_Lobe_Epilepsy	TLE	10	-0.121795	.	YES	-0.141936	0.88713	Smaller	.	0.740295
DOID:3312	Bipolar_disorder	BI	26	DOID:684	Hepatocellular_Carcinoma	HCC	21	0.345784	YES	.	2.92528	0.00344149	larger	.	0.00384046
DOID:3312	Bipolar_disorder	BI	26	DOID:1612	Breast_Cancer	BC	37	0.0502343	YES	.	1.81633	0.0693198	larger	.	0.0580199
DOID:3312	Bipolar_disorder	BI	26	DOID:1909	Melanoma	MEL	20	0.116973	YES	.	1.77855	0.0753132	larger	.	0.071352
DOID:3312	Bipolar_disorder	BI	26	DOID:3093	Nervous_System_Cancer	NSC	20	0.0669732	YES	.	1.45586	0.145431	larger	.	0.126927
DOID:3312	Bipolar_disorder	BI	26	DOID:10763	Hypertension	HTN	12	0.178644	YES	.	1.32981	0.183581	larger	.	0.152494
DOID:3312	Bipolar_disorder	BI	26	DOID:219	Colon_Cancer	HCNC	10	0.144872	YES	.	0.864221	0.387466	larger	.	0.335265
DOID:3312	Bipolar_disorder	BI	26	DOID:3620	Central_Nervous_System_Cancer	CNSC	10	0.12265	YES	.	0.820166	0.412122	larger	.	0.335265
DOID:3312	Bipolar_disorder	BI	26	DOID:12858	Huntington's_disease	HD	4	0.428205	YES	.	0.796607	0.425679	larger	.	0.383614
DOID:3312	Bipolar_disorder	BI	26	DOID:9255	Frontotemporal_dementia	FTD	8	0.101244	YES	.	0.453735	0.65002	larger	.	0.551134
DOID:3312	Bipolar_disorder	BI	26	DOID:5517	Stomach_Carcinoma	SCA	2	0.14011	YES	.	-0.217804	0.827582	Smaller	.	0.676039
DOID:3312	Bipolar_disorder	BI	26	DOID:3312	Bipolar_disorder	BI	26	0	.	.	0	1	larger	.	1
DOID:3312	Bipolar_disorder	BI	26	DOID:6270	Gastric_Cardia_Carcinoma	GCCA	0	0	.	.	0	1	larger	.	1
DOID:3312	Bipolar_disorder	BI	26	DOID:10540	Gastric_Lymphoma	GLC	0	0	.	.	0	1	larger	.	1
DOID:3312	Bipolar_disorder	BI	26	DOID:3717	Gastric_Adenocarcinoma	GAC	1	.	.	.	.	.	.	.	NA
DOID:1612	Breast_Cancer	BC	37	DOID:3119	Gastrointestinal_System_Cancer	GISC	50	-0.609438	.	YES	-1.97963	0.0477455	Smaller	.	0.0469366
DOID:1612	Breast_Cancer	BC	37	DOID:1909	Melanoma	MEL	20	-0.52206	.	YES	-1.77693	0.0755792	Smaller	.	0.071352
DOID:1612	Breast_Cancer	BC	37	DOID:219	Colon_Cancer	HCNC	10	-0.372685	.	YES	-1.59134	0.111533	Smaller	.	0.105628
DOID:1612	Breast_Cancer	BC	37	DOID:769	NeuroBlastoma	NB	8	-0.284122	.	YES	-1.45107	0.146759	Smaller	.	0.126927
DOID:1612	Breast_Cancer	BC	37	DOID:2621	Autonomic_Nervous_System_Neoplasm	ANSN	8	-0.284122	.	YES	-1.41053	0.158383	Smaller	.	0.126927
DOID:1612	Breast_Cancer	BC	37	DOID:3620	Central_Nervous_System_Cancer	CNSC	10	-0.310983	.	YES	-1.31919	0.187105	Smaller	.	0.152494
DOID:1612	Breast_Cancer	BC	37	DOID:1192	Peripheral_Nervous_System_Neoplasm	PNSN	9	-0.264134	.	YES	-1.25551	0.209293	Smaller	.	0.18086
DOID:1612	Breast_Cancer	BC	37	DOID:3093	Nervous_System_Cancer	NSC	20	-0.379078	.	YES	-0.951597	0.341301	Smaller	.	0.290001
DOID:1612	Breast_Cancer	BC	37	DOID:5517	Stomach_Carcinoma	SCA	2	-0.0190575	.	YES	-0.726062	0.467801	Smaller	.	0.383614
DOID:1612	Breast_Cancer	BC	37	DOID:684	Hepatocellular_Carcinoma	HCC	21	-0.204544	.	YES	0.0748074	0.940368	larger	.	0.805432
DOID:1612	Breast_Cancer	BC	37	DOID:1749	Squamous_Cell_Carcinoma	SCC	16	-0.152282	.	YES	-0.0385029	0.969287	Smaller	.	0.805432
DOID:1612	Breast_Cancer	BC	37	DOID:10534	Stomach_Cancer	SC	102	-0.295236	.	YES	0.0278952	0.977746	larger	.	0.805432
DOID:1612	Breast_Cancer	BC	37	DOID:2234	Focal_Epilepsy	FEpi	12	0.479569	YES	.	2.50269	0.0123253	larger	.	0.011173
DOID:1612	Breast_Cancer	BC	37	DOID:3328	Temporal_Lobe_Epilepsy	TLE	10	0.548591	YES	.	2.48886	0.0128154	larger	.	0.0144314
DOID:1612	Breast_Cancer	BC	37	DOID:3070	Malignant_Glioma	MG	17	0.0134546	YES	.	0.9329	0.350872	larger	.	0.290001
DOID:1612	Breast_Cancer	BC	37	DOID:1612	Breast_Cancer	BC	37	0	.	.	0	1	larger	.	1
DOID:1612	Breast_Cancer	BC	37	DOID:6270	Gastric_Cardia_Carcinoma	GCCA	0	0	.	.	0	1	larger	.	1
DOID:1612	Breast_Cancer	BC	37	DOID:10540	Gastric_Lymphoma	GLC	0	0	.	.	0	1	larger	.	1
DOID:1612	Breast_Cancer	BC	37	DOID:3717	Gastric_Adenocarcinoma	GAC	1	.	.	.	.	.	.	.	NA
DOID:3620	Central_Nervous_System_Cancer	CNSC	10	DOID:3119	Gastrointestinal_System_Cancer	GISC	50	-0.336667	.	YES	-1.82089	0.068623	Smaller	.	0.0580199
DOID:3620	Central_Nervous_System_Cancer	CNSC	10	DOID:10534	Stomach_Cancer	SC	102	-0.0119748	.	YES	-1.27333	0.2029	Smaller	.	0.18086
DOID:3620	Central_Nervous_System_Cancer	CNSC	10	DOID:3070	Malignant_Glioma	MG	17	-0.416776	.	YES	-0.960897	0.336604	Smaller	.	0.290001
DOID:3620	Central_Nervous_System_Cancer	CNSC	10	DOID:5517	Stomach_Carcinoma	SCA	2	-0.366667	.	YES	-0.582182	0.560444	Smaller	.	0.491364
DOID:3620	Central_Nervous_System_Cancer	CNSC	10	DOID:3620	Central_Nervous_System_Cancer	CNSC	10	0	.	.	0	1	larger	.	1
DOID:3620	Central_Nervous_System_Cancer	CNSC	10	DOID:6270	Gastric_Cardia_Carcinoma	GCCA	0	0	.	.	0	1	larger	.	1
DOID:3620	Central_Nervous_System_Cancer	CNSC	10	DOID:10540	Gastric_Lymphoma	GLC	0	0	.	.	0	1	larger	.	1
DOID:3620	Central_Nervous_System_Cancer	CNSC	10	DOID:3717	Gastric_Adenocarcinoma	GAC	1	.	.	.	.	.	.	.	NA
DOID:219	Colon_Cancer	HCNC	10	DOID:3119	Gastrointestinal_System_Cancer	GISC	50	-0.453333	.	YES	-2.4666	0.0136403	Smaller	.	0.0144314
DOID:219	Colon_Cancer	HCNC	10	DOID:3620	Central_Nervous_System_Cancer	CNSC	10	-0.6	.	YES	-1.35397	0.175746	Smaller	.	0.152494
DOID:219	Colon_Cancer	HCNC	10	DOID:769	NeuroBlastoma	NB	8	-0.573611	.	YES	-1.27773	0.201346	Smaller	.	0.18086
DOID:219	Colon_Cancer	HCNC	10	DOID:2621	Autonomic_Nervous_System_Neoplasm	ANSN	8	-0.573611	.	YES	-1.25986	0.207718	Smaller	.	0.18086
DOID:219	Colon_Cancer	HCNC	10	DOID:1192	Peripheral_Nervous_System_Neoplasm	PNSN	9	-0.534503	.	YES	-1.20385	0.228649	Smaller	.	0.18086
DOID:219	Colon_Cancer	HCNC	10	DOID:5517	Stomach_Carcinoma	SCA	2	-0.65	.	YES	-1.05206	0.292772	Smaller	.	0.249559
DOID:219	Colon_Cancer	HCNC	10	DOID:3093	Nervous_System_Cancer	NSC	20	-0.341667	.	YES	-0.864581	0.387269	Smaller	.	0.335265
DOID:219	Colon_Cancer	HCNC	10	DOID:3070	Malignant_Glioma	MG	17	-0.338998	.	YES	-0.717966	0.472778	Smaller	.	0.383614
DOID:219	Colon_Cancer	HCNC	10	DOID:3328	Temporal_Lobe_Epilepsy	TLE	10	0.7	YES	.	2.75319	0.00590176	larger	.	0.00660033
DOID:219	Colon_Cancer	HCNC	10	DOID:2234	Focal_Epilepsy	FEpi	12	0.603788	YES	.	2.58515	0.00973361	larger	.	0.011173
DOID:219	Colon_Cancer	HCNC	10	DOID:10534	Stomach_Cancer	SC	102	0.0826681	YES	.	-0.851551	0.394463	Smaller	.	0.335265
DOID:219	Colon_Cancer	HCNC	10	DOID:219	Colon_Cancer	HCNC	10	0	.	.	0	1	larger	.	1
DOID:219	Colon_Cancer	HCNC	10	DOID:6270	Gastric_Cardia_Carcinoma	GCCA	0	0	.	.	0	1	larger	.	1
DOID:219	Colon_Cancer	HCNC	10	DOID:10540	Gastric_Lymphoma	GLC	0	0	.	.	0	1	larger	.	1
DOID:219	Colon_Cancer	HCNC	10	DOID:3717	Gastric_Adenocarcinoma	GAC	1	.	.	.	.	.	.	.	NA
DOID:1826	Epilepsy_syndrome	Epi	21	DOID:2234	Focal_Epilepsy	FEpi	12	-1.31656	.	YES	-4.66104	3.15e-06	Smaller	**	0.000123078
DOID:1826	Epilepsy_syndrome	Epi	21	DOID:3328	Temporal_Lobe_Epilepsy	TLE	10	-1.0745	.	YES	-3.63012	0.000283292	Smaller	.	0.000617477
DOID:1826	Epilepsy_syndrome	Epi	21	DOID:1059	Intellectual_Disability	ID	28	-0.628401	.	YES	-2.07313	0.0381601	Smaller	.	0.0377391
DOID:1826	Epilepsy_syndrome	Epi	21	DOID:769	NeuroBlastoma	NB	8	-0.184832	.	YES	-0.444121	0.656955	Smaller	.	0.551134
DOID:1826	Epilepsy_syndrome	Epi	21	DOID:2621	Autonomic_Nervous_System_Neoplasm	ANSN	8	-0.184832	.	YES	-0.425328	0.670598	Smaller	.	0.551134
DOID:1826	Epilepsy_syndrome	Epi	21	DOID:14330	Parkinson's_disease	PD	13	-0.238418	.	YES	-0.304673	0.760615	Smaller	.	0.611669
DOID:1826	Epilepsy_syndrome	Epi	21	DOID:1192	Peripheral_Nervous_System_Neoplasm	PNSN	9	-0.169841	.	YES	-0.261726	0.793533	Smaller	.	0.676039
DOID:1826	Epilepsy_syndrome	Epi	21	DOID:684	Hepatocellular_Carcinoma	HCC	21	0.547619	YES	.	3.66132	0.000250915	larger	.	0.000617477
DOID:1826	Epilepsy_syndrome	Epi	21	DOID:1612	Breast_Cancer	BC	37	0.359495	YES	.	3.17015	0.00152362	larger	.	0.00228216
DOID:1826	Epilepsy_syndrome	Epi	21	DOID:1909	Melanoma	MEL	20	0.369657	YES	.	2.82426	0.00473904	larger	.	0.0050629
DOID:1826	Epilepsy_syndrome	Epi	21	DOID:1749	Squamous_Cell_Carcinoma	SCC	16	0.304858	YES	.	2.25599	0.024071	larger	.	0.0236435
DOID:1826	Epilepsy_syndrome	Epi	21	DOID:3119	Gastrointestinal_System_Cancer	GISC	50	0.161019	YES	.	2.1358	0.0326957	larger	.	0.0299184
DOID:1826	Epilepsy_syndrome	Epi	21	DOID:3070	Malignant_Glioma	MG	17	0.252175	YES	.	2.11538	0.0343977	larger	.	0.0299184
DOID:1826	Epilepsy_syndrome	Epi	21	DOID:10763	Hypertension	HTN	12	0.334957	YES	.	1.98362	0.047298	larger	.	0.0469366
DOID:1826	Epilepsy_syndrome	Epi	21	DOID:219	Colon_Cancer	HCNC	10	0.380338	YES	.	1.95141	0.0510084	larger	.	0.0469366
DOID:1826	Epilepsy_syndrome	Epi	21	DOID:3620	Central_Nervous_System_Cancer	CNSC	10	0.338402	YES	.	1.78956	0.0735242	larger	.	0.071352
DOID:1826	Epilepsy_syndrome	Epi	21	DOID:3093	Nervous_System_Cancer	NSC	20	0.124535	YES	.	1.6188	0.10549	larger	.	0.0867806
DOID:1826	Epilepsy_syndrome	Epi	21	DOID:9255	Frontotemporal_dementia	FTD	8	0.226806	YES	.	1.07884	0.280658	larger	.	0.249559
DOID:1826	Epilepsy_syndrome	Epi	21	DOID:10534	Stomach_Cancer	SC	102	0.0708649	YES	.	0.894292	0.371166	larger	.	0.335265
DOID:1826	Epilepsy_syndrome	Epi	21	DOID:12858	Huntington's_disease	HD	4	0.229048	YES	.	0.374303	0.708179	larger	.	0.611669
DOID:1826	Epilepsy_syndrome	Epi	21	DOID:5517	Stomach_Carcinoma	SCA	2	0.3147	YES	.	0.218342	0.827163	larger	.	0.676039
DOID:1826	Epilepsy_syndrome	Epi	21	DOID:1826	Epilepsy_syndrome	Epi	21	0	.	.	0	1	larger	.	1
DOID:1826	Epilepsy_syndrome	Epi	21	DOID:6270	Gastric_Cardia_Carcinoma	GCCA	0	0	.	.	0	1	larger	.	1
DOID:1826	Epilepsy_syndrome	Epi	21	DOID:10540	Gastric_Lymphoma	GLC	0	0	.	.	0	1	larger	.	1
DOID:1826	Epilepsy_syndrome	Epi	21	DOID:3717	Gastric_Adenocarcinoma	GAC	1	.	.	.	.	.	.	.	NA
DOID:2234	Focal_Epilepsy	FEpi	12	DOID:769	NeuroBlastoma	NB	8	-0.354167	.	YES	-0.692233	0.488791	Smaller	.	0.436039
DOID:2234	Focal_Epilepsy	FEpi	12	DOID:2621	Autonomic_Nervous_System_Neoplasm	ANSN	8	-0.354167	.	YES	-0.641991	0.520879	Smaller	.	0.436039
DOID:2234	Focal_Epilepsy	FEpi	12	DOID:1192	Peripheral_Nervous_System_Neoplasm	PNSN	9	-0.287698	.	YES	-0.423143	0.672191	Smaller	.	0.551134
DOID:2234	Focal_Epilepsy	FEpi	12	DOID:3119	Gastrointestinal_System_Cancer	GISC	50	0.56414	YES	.	2.76726	0.00565305	larger	.	0.00660033
DOID:2234	Focal_Epilepsy	FEpi	12	DOID:3070	Malignant_Glioma	MG	17	0.533384	YES	.	2.56752	0.0102427	larger	.	0.011173
DOID:2234	Focal_Epilepsy	FEpi	12	DOID:10534	Stomach_Cancer	SC	102	0.449303	YES	.	1.50623	0.132009	larger	.	0.105628
DOID:2234	Focal_Epilepsy	FEpi	12	DOID:3620	Central_Nervous_System_Cancer	CNSC	10	0.258333	YES	.	1.46513	0.142884	larger	.	0.126927
DOID:2234	Focal_Epilepsy	FEpi	12	DOID:3093	Nervous_System_Cancer	NSC	20	0.152083	YES	.	1.22953	0.218875	larger	.	0.18086
DOID:2234	Focal_Epilepsy	FEpi	12	DOID:5517	Stomach_Carcinoma	SCA	2	0.244048	YES	.	0.377479	0.705817	larger	.	0.611669
DOID:2234	Focal_Epilepsy	FEpi	12	DOID:2234	Focal_Epilepsy	FEpi	12	0	.	.	0	1	larger	.	1
DOID:2234	Focal_Epilepsy	FEpi	12	DOID:6270	Gastric_Cardia_Carcinoma	GCCA	0	0	.	.	0	1	larger	.	1
DOID:2234	Focal_Epilepsy	FEpi	12	DOID:10540	Gastric_Lymphoma	GLC	0	0	.	.	0	1	larger	.	1
DOID:2234	Focal_Epilepsy	FEpi	12	DOID:3717	Gastric_Adenocarcinoma	GAC	1	.	.	.	.	.	.	.	NA
DOID:9255	Frontotemporal_dementia	FTD	8	DOID:1749	Squamous_Cell_Carcinoma	SCC	16	-0.708333	.	YES	-2.02241	0.0431338	Smaller	.	0.0377391
DOID:9255	Frontotemporal_dementia	FTD	8	DOID:3119	Gastrointestinal_System_Cancer	GISC	50	-0.270862	.	YES	-1.68323	0.0923313	Smaller	.	0.0867806
DOID:9255	Frontotemporal_dementia	FTD	8	DOID:1612	Breast_Cancer	BC	37	-0.329955	.	YES	-1.54814	0.121589	Smaller	.	0.105628
DOID:9255	Frontotemporal_dementia	FTD	8	DOID:1192	Peripheral_Nervous_System_Neoplasm	PNSN	9	-0.548203	.	YES	-1.13955	0.254475	Smaller	.	0.213482
DOID:9255	Frontotemporal_dementia	FTD	8	DOID:3620	Central_Nervous_System_Cancer	CNSC	10	-0.519444	.	YES	-1.07119	0.284084	Smaller	.	0.249559
DOID:9255	Frontotemporal_dementia	FTD	8	DOID:3093	Nervous_System_Cancer	NSC	20	-0.364286	.	YES	-1.0539	0.291929	Smaller	.	0.249559
DOID:9255	Frontotemporal_dementia	FTD	8	DOID:2621	Autonomic_Nervous_System_Neoplasm	ANSN	8	-0.5	.	YES	-0.98582	0.324222	Smaller	.	0.290001
DOID:9255	Frontotemporal_dementia	FTD	8	DOID:769	NeuroBlastoma	NB	8	-0.5	.	YES	-0.982027	0.326086	Smaller	.	0.290001
DOID:9255	Frontotemporal_dementia	FTD	8	DOID:1909	Melanoma	MEL	20	-0.35	.	YES	-0.919869	0.357641	Smaller	.	0.290001
DOID:9255	Frontotemporal_dementia	FTD	8	DOID:219	Colon_Cancer	HCNC	10	-0.386111	.	YES	-0.739993	0.459304	Smaller	.	0.383614
DOID:9255	Frontotemporal_dementia	FTD	8	DOID:684	Hepatocellular_Carcinoma	HCC	21	-0.251026	.	YES	-0.67804	0.497746	Smaller	.	0.436039
DOID:9255	Frontotemporal_dementia	FTD	8	DOID:5517	Stomach_Carcinoma	SCA	2	-0.175	.	YES	-0.12138	0.90339	Smaller	.	0.740295
DOID:9255	Frontotemporal_dementia	FTD	8	DOID:3070	Malignant_Glioma	MG	17	-0.110294	.	YES	-0.00335489	0.997323	Smaller	.	0.805432
DOID:9255	Frontotemporal_dementia	FTD	8	DOID:3328	Temporal_Lobe_Epilepsy	TLE	10	0.236111	YES	.	1.19017	0.233981	larger	.	0.213482
DOID:9255	Frontotemporal_dementia	FTD	8	DOID:2234	Focal_Epilepsy	FEpi	12	0.133333	YES	.	0.872377	0.383003	larger	.	0.335265
DOID:9255	Frontotemporal_dementia	FTD	8	DOID:10534	Stomach_Cancer	SC	102	0.135428	YES	.	-0.862764	0.388267	Smaller	.	0.335265
DOID:9255	Frontotemporal_dementia	FTD	8	DOID:9255	Frontotemporal_dementia	FTD	8	0	.	.	0	1	larger	.	1
DOID:9255	Frontotemporal_dementia	FTD	8	DOID:6270	Gastric_Cardia_Carcinoma	GCCA	0	0	.	.	0	1	larger	.	1
DOID:9255	Frontotemporal_dementia	FTD	8	DOID:10540	Gastric_Lymphoma	GLC	0	0	.	.	0	1	larger	.	1
DOID:9255	Frontotemporal_dementia	FTD	8	DOID:3717	Gastric_Adenocarcinoma	GAC	1	.	.	.	.	.	.	.	NA
DOID:3717	Gastric_Adenocarcinoma	GAC	1	DOID:3717	Gastric_Adenocarcinoma	GAC	1	0	.	.	0	1	larger	.	1
DOID:3717	Gastric_Adenocarcinoma	GAC	1	DOID:6270	Gastric_Cardia_Carcinoma	GCCA	0	0	.	.	0	1	larger	.	1
DOID:3717	Gastric_Adenocarcinoma	GAC	1	DOID:10540	Gastric_Lymphoma	GLC	0	0	.	.	0	1	larger	.	1
DOID:3717	Gastric_Adenocarcinoma	GAC	1	DOID:3070	Malignant_Glioma	MG	17	.	.	.	.	.	.	.	NA
DOID:6270	Gastric_Cardia_Carcinoma	GCCA	0	DOID:6270	Gastric_Cardia_Carcinoma	GCCA	0	0	.	.	0	1	larger	.	1
DOID:6270	Gastric_Cardia_Carcinoma	GCCA	0	DOID:3070	Malignant_Glioma	MG	17	0	.	.	0	1	larger	.	1
DOID:10540	Gastric_Lymphoma	GLC	0	DOID:6270	Gastric_Cardia_Carcinoma	GCCA	0	0	.	.	0	1	larger	.	1
DOID:10540	Gastric_Lymphoma	GLC	0	DOID:10540	Gastric_Lymphoma	GLC	0	0	.	.	0	1	larger	.	1
DOID:10540	Gastric_Lymphoma	GLC	0	DOID:3070	Malignant_Glioma	MG	17	0	.	.	0	1	larger	.	1
DOID:3119	Gastrointestinal_System_Cancer	GISC	50	DOID:3070	Malignant_Glioma	MG	17	-0.0866374	.	YES	0.226401	0.82089	larger	.	0.676039
DOID:3119	Gastrointestinal_System_Cancer	GISC	50	DOID:5517	Stomach_Carcinoma	SCA	2	0.0723077	YES	.	-0.725173	0.468346	Smaller	.	0.383614
DOID:3119	Gastrointestinal_System_Cancer	GISC	50	DOID:6270	Gastric_Cardia_Carcinoma	GCCA	0	0	.	.	0	1	larger	.	1
DOID:3119	Gastrointestinal_System_Cancer	GISC	50	DOID:10540	Gastric_Lymphoma	GLC	0	0	.	.	0	1	larger	.	1
DOID:3119	Gastrointestinal_System_Cancer	GISC	50	DOID:3119	Gastrointestinal_System_Cancer	GISC	50	0	.	.	0	1	larger	.	1
DOID:3119	Gastrointestinal_System_Cancer	GISC	50	DOID:3717	Gastric_Adenocarcinoma	GAC	1	.	.	.	.	.	.	.	NA
DOID:684	Hepatocellular_Carcinoma	HCC	21	DOID:3119	Gastrointestinal_System_Cancer	GISC	50	-0.710208	.	YES	-3.17076	0.00152042	Smaller	.	0.00228216
DOID:684	Hepatocellular_Carcinoma	HCC	21	DOID:3620	Central_Nervous_System_Cancer	CNSC	10	-0.744547	.	YES	-2.40271	0.0162739	Smaller	.	0.0144314
DOID:684	Hepatocellular_Carcinoma	HCC	21	DOID:219	Colon_Cancer	HCNC	10	-0.509063	.	YES	-1.53834	0.123966	Smaller	.	0.105628
DOID:684	Hepatocellular_Carcinoma	HCC	21	DOID:3093	Nervous_System_Cancer	NSC	20	-0.439925	.	YES	-1.02186	0.306846	Smaller	.	0.249559
DOID:684	Hepatocellular_Carcinoma	HCC	21	DOID:1749	Squamous_Cell_Carcinoma	SCC	16	-0.309041	.	YES	-0.532954	0.594066	Smaller	.	0.491364
DOID:684	Hepatocellular_Carcinoma	HCC	21	DOID:769	NeuroBlastoma	NB	8	-0.179906	.	YES	-0.450278	0.65251	Smaller	.	0.551134
DOID:684	Hepatocellular_Carcinoma	HCC	21	DOID:1192	Peripheral_Nervous_System_Neoplasm	PNSN	9	-0.193651	.	YES	-0.370918	0.710699	Smaller	.	0.611669
DOID:684	Hepatocellular_Carcinoma	HCC	21	DOID:2621	Autonomic_Nervous_System_Neoplasm	ANSN	8	-0.179906	.	YES	-0.361965	0.717378	Smaller	.	0.611669
DOID:684	Hepatocellular_Carcinoma	HCC	21	DOID:10534	Stomach_Cancer	SC	102	-0.0301804	.	YES	0.22404	0.822726	larger	.	0.676039
DOID:684	Hepatocellular_Carcinoma	HCC	21	DOID:2234	Focal_Epilepsy	FEpi	12	0.947511	YES	.	4.29916	1.71e-05	larger	**	0.000200263
DOID:684	Hepatocellular_Carcinoma	HCC	21	DOID:3328	Temporal_Lobe_Epilepsy	TLE	10	1.00384	YES	.	4.1743	2.99e-05	larger	*	0.000221124
DOID:684	Hepatocellular_Carcinoma	HCC	21	DOID:3070	Malignant_Glioma	MG	17	0.0529264	YES	.	1.20952	0.226464	larger	.	0.18086
DOID:684	Hepatocellular_Carcinoma	HCC	21	DOID:5517	Stomach_Carcinoma	SCA	2	0.153209	YES	.	-0.0597658	0.952342	Smaller	.	0.805432
DOID:684	Hepatocellular_Carcinoma	HCC	21	DOID:6270	Gastric_Cardia_Carcinoma	GCCA	0	0	.	.	0	1	larger	.	1
DOID:684	Hepatocellular_Carcinoma	HCC	21	DOID:10540	Gastric_Lymphoma	GLC	0	0	.	.	0	1	larger	.	1
DOID:684	Hepatocellular_Carcinoma	HCC	21	DOID:684	Hepatocellular_Carcinoma	HCC	21	0	.	.	0	1	larger	.	1
DOID:684	Hepatocellular_Carcinoma	HCC	21	DOID:3717	Gastric_Adenocarcinoma	GAC	1	.	.	.	.	.	.	.	NA
DOID:12858	Huntington's_disease	HD	4	DOID:14330	Parkinson's_disease	PD	13	-0.607466	.	YES	-1.51847	0.128896	Smaller	.	0.105628
DOID:12858	Huntington's_disease	HD	4	DOID:9255	Frontotemporal_dementia	FTD	8	-0.458333	.	YES	-0.772189	0.440003	Smaller	.	0.383614
DOID:12858	Huntington's_disease	HD	4	DOID:2234	Focal_Epilepsy	FEpi	12	-0.229167	.	YES	-0.500889	0.616449	Smaller	.	0.491364
DOID:12858	Huntington's_disease	HD	4	DOID:5517	Stomach_Carcinoma	SCA	2	-0.0833333	.	YES	0.390475	0.696185	larger	.	0.611669
DOID:12858	Huntington's_disease	HD	4	DOID:219	Colon_Cancer	HCNC	10	-0.221429	.	YES	-0.306618	0.759134	Smaller	.	0.611669
DOID:12858	Huntington's_disease	HD	4	DOID:1909	Melanoma	MEL	20	-0.0166667	.	YES	-0.271823	0.785758	Smaller	.	0.676039
DOID:12858	Huntington's_disease	HD	4	DOID:2621	Autonomic_Nervous_System_Neoplasm	ANSN	8	-0.0625	.	YES	0.189098	0.850016	larger	.	0.740295
DOID:12858	Huntington's_disease	HD	4	DOID:769	NeuroBlastoma	NB	8	-0.0625	.	YES	0.177188	0.859361	larger	.	0.740295
DOID:12858	Huntington's_disease	HD	4	DOID:3620	Central_Nervous_System_Cancer	CNSC	10	-0.164286	.	YES	-0.169919	0.865074	Smaller	.	0.740295
DOID:12858	Huntington's_disease	HD	4	DOID:1749	Squamous_Cell_Carcinoma	SCC	16	-0.025	.	YES	-0.161442	0.871745	Smaller	.	0.740295
DOID:12858	Huntington's_disease	HD	4	DOID:3328	Temporal_Lobe_Epilepsy	TLE	10	-0.0357143	.	YES	0.12169	0.903145	larger	.	0.740295
DOID:12858	Huntington's_disease	HD	4	DOID:3070	Malignant_Glioma	MG	17	0.490896	YES	.	1.25422	0.209764	larger	.	0.18086
DOID:12858	Huntington's_disease	HD	4	DOID:684	Hepatocellular_Carcinoma	HCC	21	0.331905	YES	.	0.660685	0.508814	larger	.	0.436039
DOID:12858	Huntington's_disease	HD	4	DOID:3119	Gastrointestinal_System_Cancer	GISC	50	0.148519	YES	.	-0.635434	0.525145	Smaller	.	0.436039
DOID:12858	Huntington's_disease	HD	4	DOID:1612	Breast_Cancer	BC	37	0.128378	YES	.	-0.428656	0.668173	Smaller	.	0.551134
DOID:12858	Huntington's_disease	HD	4	DOID:1192	Peripheral_Nervous_System_Neoplasm	PNSN	9	0.00213675	YES	.	0.235521	0.813804	larger	.	0.676039
DOID:12858	Huntington's_disease	HD	4	DOID:10534	Stomach_Cancer	SC	102	0.488901	YES	.	-0.167934	0.866635	Smaller	.	0.740295
DOID:12858	Huntington's_disease	HD	4	DOID:3093	Nervous_System_Cancer	NSC	20	0.1	YES	.	0.0325573	0.974028	larger	.	0.805432
DOID:12858	Huntington's_disease	HD	4	DOID:6270	Gastric_Cardia_Carcinoma	GCCA	0	0	.	.	0	1	larger	.	1
DOID:12858	Huntington's_disease	HD	4	DOID:10540	Gastric_Lymphoma	GLC	0	0	.	.	0	1	larger	.	1
DOID:12858	Huntington's_disease	HD	4	DOID:12858	Huntington's_disease	HD	4	0	.	.	0	1	larger	.	1
DOID:12858	Huntington's_disease	HD	4	DOID:3717	Gastric_Adenocarcinoma	GAC	1	.	.	.	.	.	.	.	NA
DOID:10763	Hypertension	HTN	12	DOID:1192	Peripheral_Nervous_System_Neoplasm	PNSN	9	-0.549603	.	YES	-1.30819	0.190807	Smaller	.	0.152494
DOID:10763	Hypertension	HTN	12	DOID:769	NeuroBlastoma	NB	8	-0.4875	.	YES	-1.08676	0.277144	Smaller	.	0.249559
DOID:10763	Hypertension	HTN	12	DOID:2621	Autonomic_Nervous_System_Neoplasm	ANSN	8	-0.4875	.	YES	-1.05142	0.293067	Smaller	.	0.249559
DOID:10763	Hypertension	HTN	12	DOID:5517	Stomach_Carcinoma	SCA	2	-0.517857	.	YES	-0.965482	0.334303	Smaller	.	0.290001
DOID:10763	Hypertension	HTN	12	DOID:684	Hepatocellular_Carcinoma	HCC	21	-0.00703463	.	YES	0.575363	0.565046	larger	.	0.491364
DOID:10763	Hypertension	HTN	12	DOID:3070	Malignant_Glioma	MG	17	-0.0240872	.	YES	0.571444	0.567699	larger	.	0.491364
DOID:10763	Hypertension	HTN	12	DOID:1909	Melanoma	MEL	20	-0.0375	.	YES	0.501057	0.616331	larger	.	0.491364
DOID:10763	Hypertension	HTN	12	DOID:3620	Central_Nervous_System_Cancer	CNSC	10	-0.302273	.	YES	-0.424824	0.670965	Smaller	.	0.551134
DOID:10763	Hypertension	HTN	12	DOID:3093	Nervous_System_Cancer	NSC	20	-0.0875	.	YES	0.289071	0.772527	larger	.	0.676039
DOID:10763	Hypertension	HTN	12	DOID:9255	Frontotemporal_dementia	FTD	8	-0.2	.	YES	-0.177898	0.858803	Smaller	.	0.740295
DOID:10763	Hypertension	HTN	12	DOID:1749	Squamous_Cell_Carcinoma	SCC	16	-0.142857	.	YES	0.111688	0.911071	larger	.	0.740295
DOID:10763	Hypertension	HTN	12	DOID:219	Colon_Cancer	HCNC	10	-0.138636	.	YES	0.106486	0.915197	larger	.	0.740295
DOID:10763	Hypertension	HTN	12	DOID:3119	Gastrointestinal_System_Cancer	GISC	50	-0.011129	.	YES	-0.0542325	0.95675	Smaller	.	0.805432
DOID:10763	Hypertension	HTN	12	DOID:2234	Focal_Epilepsy	FEpi	12	0.416667	YES	.	2.19329	0.0282865	larger	.	0.0299184
DOID:10763	Hypertension	HTN	12	DOID:3328	Temporal_Lobe_Epilepsy	TLE	10	0.443182	YES	.	2.034	0.0419513	larger	.	0.0377391
DOID:10763	Hypertension	HTN	12	DOID:1612	Breast_Cancer	BC	37	0.176848	YES	.	1.13644	0.255774	larger	.	0.213482
DOID:10763	Hypertension	HTN	12	DOID:12858	Huntington's_disease	HD	4	0.375	YES	.	1.09434	0.273804	larger	.	0.249559
DOID:10763	Hypertension	HTN	12	DOID:14330	Parkinson's_disease	PD	13	0.115769	YES	.	1.04583	0.295642	larger	.	0.249559
DOID:10763	Hypertension	HTN	12	DOID:10534	Stomach_Cancer	SC	102	0.291409	YES	.	0.662288	0.507787	larger	.	0.436039
DOID:10763	Hypertension	HTN	12	DOID:6270	Gastric_Cardia_Carcinoma	GCCA	0	0	.	.	0	1	larger	.	1
DOID:10763	Hypertension	HTN	12	DOID:10540	Gastric_Lymphoma	GLC	0	0	.	.	0	1	larger	.	1
DOID:10763	Hypertension	HTN	12	DOID:10763	Hypertension	HTN	12	0	.	.	0	1	larger	.	1
DOID:10763	Hypertension	HTN	12	DOID:3717	Gastric_Adenocarcinoma	GAC	1	.	.	.	.	.	.	.	NA
DOID:1059	Intellectual_Disability	ID	28	DOID:1192	Peripheral_Nervous_System_Neoplasm	PNSN	9	-0.39098	.	YES	-1.43126	0.152355	Smaller	.	0.126927
DOID:1059	Intellectual_Disability	ID	28	DOID:3119	Gastrointestinal_System_Cancer	GISC	50	-0.105806	.	YES	1.20658	0.227592	larger	.	0.18086
DOID:1059	Intellectual_Disability	ID	28	DOID:769	NeuroBlastoma	NB	8	-0.302579	.	YES	-1.16793	0.242836	Smaller	.	0.213482
DOID:1059	Intellectual_Disability	ID	28	DOID:2621	Autonomic_Nervous_System_Neoplasm	ANSN	8	-0.302579	.	YES	-1.07532	0.282233	Smaller	.	0.249559
DOID:1059	Intellectual_Disability	ID	28	DOID:3093	Nervous_System_Cancer	NSC	20	-0.0428571	.	YES	0.904651	0.36565	larger	.	0.290001
DOID:1059	Intellectual_Disability	ID	28	DOID:2234	Focal_Epilepsy	FEpi	12	-0.284524	.	YES	-0.714956	0.474636	Smaller	.	0.383614
DOID:1059	Intellectual_Disability	ID	28	DOID:14330	Parkinson's_disease	PD	13	-0.220015	.	YES	-0.387255	0.698567	Smaller	.	0.611669
DOID:1059	Intellectual_Disability	ID	28	DOID:219	Colon_Cancer	HCNC	10	-0.00996241	.	YES	0.231398	0.817005	larger	.	0.676039
DOID:1059	Intellectual_Disability	ID	28	DOID:10534	Stomach_Cancer	SC	102	-0.158129	.	YES	0.217796	0.827588	larger	.	0.676039
DOID:1059	Intellectual_Disability	ID	28	DOID:3328	Temporal_Lobe_Epilepsy	TLE	10	-0.031015	.	YES	0.126575	0.899277	larger	.	0.740295
DOID:1059	Intellectual_Disability	ID	28	DOID:684	Hepatocellular_Carcinoma	HCC	21	0.412415	YES	.	3.25873	0.00111912	larger	.	0.00176899
DOID:1059	Intellectual_Disability	ID	28	DOID:1909	Melanoma	MEL	20	0.23631	YES	.	2.37433	0.0175807	larger	.	0.0185869
DOID:1059	Intellectual_Disability	ID	28	DOID:1612	Breast_Cancer	BC	37	0.0259059	YES	.	1.83724	0.0661748	larger	.	0.0580199
DOID:1059	Intellectual_Disability	ID	28	DOID:1749	Squamous_Cell_Carcinoma	SCC	16	0.12987	YES	.	1.46665	0.142472	larger	.	0.126927
DOID:1059	Intellectual_Disability	ID	28	DOID:3620	Central_Nervous_System_Cancer	CNSC	10	0.242669	YES	.	1.24898	0.211671	larger	.	0.18086
DOID:1059	Intellectual_Disability	ID	28	DOID:3070	Malignant_Glioma	MG	17	0.0301821	YES	.	1.11166	0.266286	larger	.	0.213482
DOID:1059	Intellectual_Disability	ID	28	DOID:10763	Hypertension	HTN	12	0.0571429	YES	.	0.757048	0.449021	larger	.	0.383614
DOID:1059	Intellectual_Disability	ID	28	DOID:9255	Frontotemporal_dementia	FTD	8	0.134921	YES	.	0.508975	0.610769	larger	.	0.491364
DOID:1059	Intellectual_Disability	ID	28	DOID:5517	Stomach_Carcinoma	SCA	2	0.0988095	YES	.	-0.358279	0.720135	Smaller	.	0.611669
DOID:1059	Intellectual_Disability	ID	28	DOID:12858	Huntington's_disease	HD	4	0.263393	YES	.	0.240732	0.809763	larger	.	0.676039
DOID:1059	Intellectual_Disability	ID	28	DOID:6270	Gastric_Cardia_Carcinoma	GCCA	0	0	.	.	0	1	larger	.	1
DOID:1059	Intellectual_Disability	ID	28	DOID:10540	Gastric_Lymphoma	GLC	0	0	.	.	0	1	larger	.	1
DOID:1059	Intellectual_Disability	ID	28	DOID:1059	Intellectual_Disability	ID	28	0	.	.	0	1	larger	.	1
DOID:1059	Intellectual_Disability	ID	28	DOID:3717	Gastric_Adenocarcinoma	GAC	1	.	.	.	.	.	.	.	NA
DOID:3070	Malignant_Glioma	MG	17	DOID:3070	Malignant_Glioma	MG	17	0	.	.	0	1	larger	.	1
DOID:1909	Melanoma	MEL	20	DOID:769	NeuroBlastoma	NB	8	-0.5375	.	YES	-1.74062	0.0817509	Smaller	.	0.071352
DOID:1909	Melanoma	MEL	20	DOID:2621	Autonomic_Nervous_System_Neoplasm	ANSN	8	-0.5375	.	YES	-1.68286	0.0924019	Smaller	.	0.0867806
DOID:1909	Melanoma	MEL	20	DOID:3620	Central_Nervous_System_Cancer	CNSC	10	-0.558333	.	YES	-1.6069	0.108076	Smaller	.	0.0867806
DOID:1909	Melanoma	MEL	20	DOID:1192	Peripheral_Nervous_System_Neoplasm	PNSN	9	-0.504693	.	YES	-1.51863	0.128854	Smaller	.	0.105628
DOID:1909	Melanoma	MEL	20	DOID:219	Colon_Cancer	HCNC	10	-0.425	.	YES	-1.1666	0.243371	Smaller	.	0.213482
DOID:1909	Melanoma	MEL	20	DOID:3093	Nervous_System_Cancer	NSC	20	-0.45	.	YES	-1.1243	0.260885	Smaller	.	0.213482
DOID:1909	Melanoma	MEL	20	DOID:3119	Gastrointestinal_System_Cancer	GISC	50	-0.287857	.	YES	-0.688008	0.491448	Smaller	.	0.436039
DOID:1909	Melanoma	MEL	20	DOID:684	Hepatocellular_Carcinoma	HCC	21	-0.365534	.	YES	-0.659271	0.509721	Smaller	.	0.436039
DOID:1909	Melanoma	MEL	20	DOID:5517	Stomach_Carcinoma	SCA	2	-0.134091	.	YES	-0.56308	0.57338	Smaller	.	0.491364
DOID:1909	Melanoma	MEL	20	DOID:1749	Squamous_Cell_Carcinoma	SCC	16	-0.127778	.	YES	0.295839	0.767353	larger	.	0.676039
DOID:1909	Melanoma	MEL	20	DOID:3328	Temporal_Lobe_Epilepsy	TLE	10	0.441667	YES	.	2.18448	0.0289273	larger	.	0.0299184
DOID:1909	Melanoma	MEL	20	DOID:2234	Focal_Epilepsy	FEpi	12	0.358333	YES	.	1.9906	0.046525	larger	.	0.0469366
DOID:1909	Melanoma	MEL	20	DOID:3070	Malignant_Glioma	MG	17	0.161328	YES	.	1.739	0.0820356	larger	.	0.071352
DOID:1909	Melanoma	MEL	20	DOID:10534	Stomach_Cancer	SC	102	0.0833414	YES	.	0.848941	0.395914	larger	.	0.335265
DOID:1909	Melanoma	MEL	20	DOID:6270	Gastric_Cardia_Carcinoma	GCCA	0	0	.	.	0	1	larger	.	1
DOID:1909	Melanoma	MEL	20	DOID:10540	Gastric_Lymphoma	GLC	0	0	.	.	0	1	larger	.	1
DOID:1909	Melanoma	MEL	20	DOID:1909	Melanoma	MEL	20	0	.	.	0	1	larger	.	1
DOID:1909	Melanoma	MEL	20	DOID:3717	Gastric_Adenocarcinoma	GAC	1	.	.	.	.	.	.	.	NA
DOID:3093	Nervous_System_Cancer	NSC	20	DOID:3620	Central_Nervous_System_Cancer	CNSC	10	-1.44167	.	YES	-5.0378	4.71e-07	Smaller	***	6.68e-05
DOID:3093	Nervous_System_Cancer	NSC	20	DOID:10534	Stomach_Cancer	SC	102	-0.245347	.	YES	-1.42231	0.154936	Smaller	.	0.126927
DOID:3093	Nervous_System_Cancer	NSC	20	DOID:3119	Gastrointestinal_System_Cancer	GISC	50	-0.352143	.	YES	-1.04772	0.294769	Smaller	.	0.249559
DOID:3093	Nervous_System_Cancer	NSC	20	DOID:5517	Stomach_Carcinoma	SCA	2	-0.0477273	.	YES	-0.429019	0.66791	Smaller	.	0.551134
DOID:3093	Nervous_System_Cancer	NSC	20	DOID:3070	Malignant_Glioma	MG	17	-0.267051	.	YES	-0.266227	0.790064	Smaller	.	0.676039
DOID:3093	Nervous_System_Cancer	NSC	20	DOID:6270	Gastric_Cardia_Carcinoma	GCCA	0	0	.	.	0	1	larger	.	1
DOID:3093	Nervous_System_Cancer	NSC	20	DOID:10540	Gastric_Lymphoma	GLC	0	0	.	.	0	1	larger	.	1
DOID:3093	Nervous_System_Cancer	NSC	20	DOID:3093	Nervous_System_Cancer	NSC	20	0	.	.	0	1	larger	.	1
DOID:3093	Nervous_System_Cancer	NSC	20	DOID:3717	Gastric_Adenocarcinoma	GAC	1	.	.	.	.	.	.	.	NA
DOID:769	NeuroBlastoma	NB	8	DOID:2621	Autonomic_Nervous_System_Neoplasm	ANSN	8	-2.125	.	YES	-5.54	3.02e-08	Smaller	***	2.29e-05
DOID:769	NeuroBlastoma	NB	8	DOID:1192	Peripheral_Nervous_System_Neoplasm	PNSN	9	-2.00041	.	YES	-5.50162	3.76e-08	Smaller	***	2.29e-05
DOID:769	NeuroBlastoma	NB	8	DOID:3093	Nervous_System_Cancer	NSC	20	-0.980357	.	YES	-3.34367	0.000826777	Smaller	.	0.001333
DOID:769	NeuroBlastoma	NB	8	DOID:3620	Central_Nervous_System_Cancer	CNSC	10	-0.706944	.	YES	-1.6975	0.0896014	Smaller	.	0.0867806
DOID:769	NeuroBlastoma	NB	8	DOID:10534	Stomach_Cancer	SC	102	-0.00661765	.	YES	-1.57527	0.115194	Smaller	.	0.105628
DOID:769	NeuroBlastoma	NB	8	DOID:5517	Stomach_Carcinoma	SCA	2	-0.9625	.	YES	-1.4163	0.156688	Smaller	.	0.126927
DOID:769	NeuroBlastoma	NB	8	DOID:3119	Gastrointestinal_System_Cancer	GISC	50	-0.148017	.	YES	-1.23222	0.217868	Smaller	.	0.18086
DOID:769	NeuroBlastoma	NB	8	DOID:3070	Malignant_Glioma	MG	17	-0.197794	.	YES	-0.313302	0.754051	Smaller	.	0.611669
DOID:769	NeuroBlastoma	NB	8	DOID:6270	Gastric_Cardia_Carcinoma	GCCA	0	0	.	.	0	1	larger	.	1
DOID:769	NeuroBlastoma	NB	8	DOID:10540	Gastric_Lymphoma	GLC	0	0	.	.	0	1	larger	.	1
DOID:769	NeuroBlastoma	NB	8	DOID:769	NeuroBlastoma	NB	8	0	.	.	0	1	larger	.	1
DOID:769	NeuroBlastoma	NB	8	DOID:3717	Gastric_Adenocarcinoma	GAC	1	.	.	.	.	.	.	.	NA
DOID:14330	Parkinson's_disease	PD	13	DOID:769	NeuroBlastoma	NB	8	-0.307921	.	YES	-0.613876	0.539297	Smaller	.	0.436039
DOID:14330	Parkinson's_disease	PD	13	DOID:2621	Autonomic_Nervous_System_Neoplasm	ANSN	8	-0.307921	.	YES	-0.502352	0.61542	Smaller	.	0.491364
DOID:14330	Parkinson's_disease	PD	13	DOID:1192	Peripheral_Nervous_System_Neoplasm	PNSN	9	-0.279332	.	YES	-0.387121	0.698666	Smaller	.	0.611669
DOID:14330	Parkinson's_disease	PD	13	DOID:2234	Focal_Epilepsy	FEpi	12	-0.250897	.	YES	-0.292286	0.770068	Smaller	.	0.676039
DOID:14330	Parkinson's_disease	PD	13	DOID:1612	Breast_Cancer	BC	37	-0.0308524	.	YES	0.247136	0.804803	larger	.	0.676039
DOID:14330	Parkinson's_disease	PD	13	DOID:219	Colon_Cancer	HCNC	10	-0.234448	.	YES	-0.239193	0.810956	Smaller	.	0.676039
DOID:14330	Parkinson's_disease	PD	13	DOID:3620	Central_Nervous_System_Cancer	CNSC	10	-0.0996656	.	YES	0.22416	0.822633	larger	.	0.676039
DOID:14330	Parkinson's_disease	PD	13	DOID:1909	Melanoma	MEL	20	-0.221503	.	YES	-0.192751	0.847154	Smaller	.	0.740295
DOID:14330	Parkinson's_disease	PD	13	DOID:3328	Temporal_Lobe_Epilepsy	TLE	10	-0.117057	.	YES	0.156937	0.875295	larger	.	0.740295
DOID:14330	Parkinson's_disease	PD	13	DOID:3093	Nervous_System_Cancer	NSC	20	-0.210897	.	YES	-0.154153	0.877489	Smaller	.	0.740295
DOID:14330	Parkinson's_disease	PD	13	DOID:3119	Gastrointestinal_System_Cancer	GISC	50	-0.0558974	.	YES	-0.139835	0.88879	Smaller	.	0.740295
DOID:14330	Parkinson's_disease	PD	13	DOID:3070	Malignant_Glioma	MG	17	0.395475	YES	.	2.29886	0.0215128	larger	.	0.0236435
DOID:14330	Parkinson's_disease	PD	13	DOID:684	Hepatocellular_Carcinoma	HCC	21	0.286792	YES	.	1.86148	0.062677	larger	.	0.0580199
DOID:14330	Parkinson's_disease	PD	13	DOID:1749	Squamous_Cell_Carcinoma	SCC	16	0.123011	YES	.	1.19407	0.232449	larger	.	0.213482
DOID:14330	Parkinson's_disease	PD	13	DOID:9255	Frontotemporal_dementia	FTD	8	0.0938645	YES	.	0.717896	0.472822	larger	.	0.383614
DOID:14330	Parkinson's_disease	PD	13	DOID:10534	Stomach_Cancer	SC	102	0.243173	YES	.	0.594592	0.552116	larger	.	0.491364
DOID:14330	Parkinson's_disease	PD	13	DOID:5517	Stomach_Carcinoma	SCA	2	0.264103	YES	.	0.407323	0.683771	larger	.	0.551134
DOID:14330	Parkinson's_disease	PD	13	DOID:6270	Gastric_Cardia_Carcinoma	GCCA	0	0	.	.	0	1	larger	.	1
DOID:14330	Parkinson's_disease	PD	13	DOID:10540	Gastric_Lymphoma	GLC	0	0	.	.	0	1	larger	.	1
DOID:14330	Parkinson's_disease	PD	13	DOID:14330	Parkinson's_disease	PD	13	0	.	.	0	1	larger	.	1
DOID:14330	Parkinson's_disease	PD	13	DOID:3717	Gastric_Adenocarcinoma	GAC	1	.	.	.	.	.	.	.	NA
DOID:1192	Peripheral_Nervous_System_Neoplasm	PNSN	9	DOID:3093	Nervous_System_Cancer	NSC	20	-1.07193	.	YES	-3.66343	0.000248859	Smaller	.	0.000617477
DOID:1192	Peripheral_Nervous_System_Neoplasm	PNSN	9	DOID:10534	Stomach_Cancer	SC	102	-0.0411146	.	YES	-1.63696	0.101639	Smaller	.	0.0867806
DOID:1192	Peripheral_Nervous_System_Neoplasm	PNSN	9	DOID:3620	Central_Nervous_System_Cancer	CNSC	10	-0.676608	.	YES	-1.63462	0.102129	Smaller	.	0.0867806
DOID:1192	Peripheral_Nervous_System_Neoplasm	PNSN	9	DOID:5517	Stomach_Carcinoma	SCA	2	-0.919192	.	YES	-1.48512	0.137512	Smaller	.	0.126927
DOID:1192	Peripheral_Nervous_System_Neoplasm	PNSN	9	DOID:3119	Gastrointestinal_System_Cancer	GISC	50	-0.167081	.	YES	-1.1773	0.239075	Smaller	.	0.213482
DOID:1192	Peripheral_Nervous_System_Neoplasm	PNSN	9	DOID:3070	Malignant_Glioma	MG	17	-0.329311	.	YES	-0.723042	0.469654	Smaller	.	0.383614
DOID:1192	Peripheral_Nervous_System_Neoplasm	PNSN	9	DOID:6270	Gastric_Cardia_Carcinoma	GCCA	0	0	.	.	0	1	larger	.	1
DOID:1192	Peripheral_Nervous_System_Neoplasm	PNSN	9	DOID:10540	Gastric_Lymphoma	GLC	0	0	.	.	0	1	larger	.	1
DOID:1192	Peripheral_Nervous_System_Neoplasm	PNSN	9	DOID:1192	Peripheral_Nervous_System_Neoplasm	PNSN	9	0	.	.	0	1	larger	.	1
DOID:1192	Peripheral_Nervous_System_Neoplasm	PNSN	9	DOID:3717	Gastric_Adenocarcinoma	GAC	1	.	.	.	.	.	.	.	NA
DOID:5419	Schizophrenia	SCH	64	DOID:10534	Stomach_Cancer	SC	102	-0.915447	.	YES	-5.27094	1.36e-07	Smaller	***	4.8e-05
DOID:5419	Schizophrenia	SCH	64	DOID:1612	Breast_Cancer	BC	37	-0.101742	.	YES	1.86719	0.0618755	larger	.	0.0580199
DOID:5419	Schizophrenia	SCH	64	DOID:0060041	Autism_Spectrum_Disorder	ASD	23	-0.392815	.	YES	-1.39428	0.163232	Smaller	.	0.152494
DOID:5419	Schizophrenia	SCH	64	DOID:769	NeuroBlastoma	NB	8	-0.0442708	.	YES	-1.12857	0.25908	Smaller	.	0.213482
DOID:5419	Schizophrenia	SCH	64	DOID:2621	Autonomic_Nervous_System_Neoplasm	ANSN	8	-0.0442708	.	YES	-1.04019	0.298249	Smaller	.	0.249559
DOID:5419	Schizophrenia	SCH	64	DOID:1192	Peripheral_Nervous_System_Neoplasm	PNSN	9	-0.0464588	.	YES	-1.00818	0.313367	Smaller	.	0.249559
DOID:5419	Schizophrenia	SCH	64	DOID:1059	Intellectual_Disability	ID	28	-0.372816	.	YES	-0.866646	0.386136	Smaller	.	0.335265
DOID:5419	Schizophrenia	SCH	64	DOID:3093	Nervous_System_Cancer	NSC	20	-0.0305804	.	YES	0.630725	0.528221	larger	.	0.436039
DOID:5419	Schizophrenia	SCH	64	DOID:1826	Epilepsy_syndrome	Epi	21	-0.235272	.	YES	-0.543705	0.586645	Smaller	.	0.491364
DOID:5419	Schizophrenia	SCH	64	DOID:3119	Gastrointestinal_System_Cancer	GISC	50	-0.435104	.	YES	-0.150461	0.880401	Smaller	.	0.740295
DOID:5419	Schizophrenia	SCH	64	DOID:1909	Melanoma	MEL	20	0.221801	YES	.	2.2853	0.0222954	larger	.	0.0236435
DOID:5419	Schizophrenia	SCH	64	DOID:1749	Squamous_Cell_Carcinoma	SCC	16	0.276562	YES	.	1.9629	0.0496582	larger	.	0.0469366
DOID:5419	Schizophrenia	SCH	64	DOID:3070	Malignant_Glioma	MG	17	0.233552	YES	.	1.86875	0.0616575	larger	.	0.0580199
DOID:5419	Schizophrenia	SCH	64	DOID:684	Hepatocellular_Carcinoma	HCC	21	0.0722908	YES	.	1.4082	0.159072	larger	.	0.126927
DOID:5419	Schizophrenia	SCH	64	DOID:10763	Hypertension	HTN	12	0.279194	YES	.	1.14231	0.253324	larger	.	0.213482
DOID:5419	Schizophrenia	SCH	64	DOID:14330	Parkinson's_disease	PD	13	0.15376	YES	.	0.653719	0.513293	larger	.	0.436039
DOID:5419	Schizophrenia	SCH	64	DOID:3328	Temporal_Lobe_Epilepsy	TLE	10	0.243454	YES	.	0.580253	0.561744	larger	.	0.491364
DOID:5419	Schizophrenia	SCH	64	DOID:3620	Central_Nervous_System_Cancer	CNSC	10	0.232644	YES	.	0.499439	0.61747	larger	.	0.551134
DOID:5419	Schizophrenia	SCH	64	DOID:2234	Focal_Epilepsy	FEpi	12	0.125685	YES	.	0.327254	0.743476	larger	.	0.611669
DOID:5419	Schizophrenia	SCH	64	DOID:5517	Stomach_Carcinoma	SCA	2	0.366714	YES	.	-0.28668	0.774358	Smaller	.	0.676039
DOID:5419	Schizophrenia	SCH	64	DOID:219	Colon_Cancer	HCNC	10	0.167779	YES	.	0.19062	0.848823	larger	.	0.740295
DOID:5419	Schizophrenia	SCH	64	DOID:9255	Frontotemporal_dementia	FTD	8	0.171007	YES	.	-0.154984	0.876834	Smaller	.	0.740295
DOID:5419	Schizophrenia	SCH	64	DOID:12858	Huntington's_disease	HD	4	0.439798	YES	.	0.0849937	0.932266	larger	.	0.805432
DOID:5419	Schizophrenia	SCH	64	DOID:6270	Gastric_Cardia_Carcinoma	GCCA	0	0	.	.	0	1	larger	.	1
DOID:5419	Schizophrenia	SCH	64	DOID:10540	Gastric_Lymphoma	GLC	0	0	.	.	0	1	larger	.	1
DOID:5419	Schizophrenia	SCH	64	DOID:5419	Schizophrenia	SCH	64	0	.	.	0	1	larger	.	1
DOID:5419	Schizophrenia	SCH	64	DOID:3717	Gastric_Adenocarcinoma	GAC	1	.	.	.	.	.	.	.	NA
DOID:1749	Squamous_Cell_Carcinoma	SCC	16	DOID:3119	Gastrointestinal_System_Cancer	GISC	50	-0.381364	.	YES	-1.59617	0.110452	Smaller	.	0.105628
DOID:1749	Squamous_Cell_Carcinoma	SCC	16	DOID:2621	Autonomic_Nervous_System_Neoplasm	ANSN	8	-0.520833	.	YES	-1.43217	0.152095	Smaller	.	0.126927
DOID:1749	Squamous_Cell_Carcinoma	SCC	16	DOID:769	NeuroBlastoma	NB	8	-0.520833	.	YES	-1.38959	0.164655	Smaller	.	0.152494
DOID:1749	Squamous_Cell_Carcinoma	SCC	16	DOID:1192	Peripheral_Nervous_System_Neoplasm	PNSN	9	-0.480556	.	YES	-1.2778	0.201321	Smaller	.	0.18086
DOID:1749	Squamous_Cell_Carcinoma	SCC	16	DOID:5517	Stomach_Carcinoma	SCA	2	-0.458333	.	YES	-1.02491	0.305405	Smaller	.	0.249559
DOID:1749	Squamous_Cell_Carcinoma	SCC	16	DOID:3620	Central_Nervous_System_Cancer	CNSC	10	-0.401923	.	YES	-0.923643	0.355672	Smaller	.	0.290001
DOID:1749	Squamous_Cell_Carcinoma	SCC	16	DOID:219	Colon_Cancer	HCNC	10	-0.371154	.	YES	-0.811361	0.417158	Smaller	.	0.335265
DOID:1749	Squamous_Cell_Carcinoma	SCC	16	DOID:3070	Malignant_Glioma	MG	17	-0.299688	.	YES	-0.438546	0.660991	Smaller	.	0.551134
DOID:1749	Squamous_Cell_Carcinoma	SCC	16	DOID:3093	Nervous_System_Cancer	NSC	20	-0.261111	.	YES	-0.308992	0.757328	Smaller	.	0.611669
DOID:1749	Squamous_Cell_Carcinoma	SCC	16	DOID:2234	Focal_Epilepsy	FEpi	12	0.261905	YES	.	1.5302	0.125967	larger	.	0.105628
DOID:1749	Squamous_Cell_Carcinoma	SCC	16	DOID:3328	Temporal_Lobe_Epilepsy	TLE	10	0.259615	YES	.	1.44203	0.149295	larger	.	0.126927
DOID:1749	Squamous_Cell_Carcinoma	SCC	16	DOID:10534	Stomach_Cancer	SC	102	0.186815	YES	.	0.836231	0.403025	larger	.	0.335265
DOID:1749	Squamous_Cell_Carcinoma	SCC	16	DOID:6270	Gastric_Cardia_Carcinoma	GCCA	0	0	.	.	0	1	larger	.	1
DOID:1749	Squamous_Cell_Carcinoma	SCC	16	DOID:10540	Gastric_Lymphoma	GLC	0	0	.	.	0	1	larger	.	1
DOID:1749	Squamous_Cell_Carcinoma	SCC	16	DOID:1749	Squamous_Cell_Carcinoma	SCC	16	0	.	.	0	1	larger	.	1
DOID:1749	Squamous_Cell_Carcinoma	SCC	16	DOID:3717	Gastric_Adenocarcinoma	GAC	1	.	.	.	.	.	.	.	NA
DOID:10534	Stomach_Cancer	SC	102	DOID:3119	Gastrointestinal_System_Cancer	GISC	50	-0.716749	.	YES	-3.20356	0.00135738	Smaller	.	0.00176899
DOID:10534	Stomach_Cancer	SC	102	DOID:3070	Malignant_Glioma	MG	17	0.165966	YES	.	0.937591	0.348455	larger	.	0.290001
DOID:10534	Stomach_Cancer	SC	102	DOID:5517	Stomach_Carcinoma	SCA	2	0.369344	YES	.	-0.508534	0.611079	Smaller	.	0.491364
DOID:10534	Stomach_Cancer	SC	102	DOID:6270	Gastric_Cardia_Carcinoma	GCCA	0	0	.	.	0	1	larger	.	1
DOID:10534	Stomach_Cancer	SC	102	DOID:10540	Gastric_Lymphoma	GLC	0	0	.	.	0	1	larger	.	1
DOID:10534	Stomach_Cancer	SC	102	DOID:10534	Stomach_Cancer	SC	102	0	.	.	0	1	larger	.	1
DOID:10534	Stomach_Cancer	SC	102	DOID:3717	Gastric_Adenocarcinoma	GAC	1	.	.	.	.	.	.	.	NA
DOID:5517	Stomach_Carcinoma	SCA	2	DOID:3070	Malignant_Glioma	MG	17	-0.340557	.	YES	-0.864338	0.387402	Smaller	.	0.335265
DOID:5517	Stomach_Carcinoma	SCA	2	DOID:6270	Gastric_Cardia_Carcinoma	GCCA	0	0	.	.	0	1	larger	.	1
DOID:5517	Stomach_Carcinoma	SCA	2	DOID:10540	Gastric_Lymphoma	GLC	0	0	.	.	0	1	larger	.	1
DOID:5517	Stomach_Carcinoma	SCA	2	DOID:5517	Stomach_Carcinoma	SCA	2	0	.	.	0	1	larger	.	1
DOID:5517	Stomach_Carcinoma	SCA	2	DOID:3717	Gastric_Adenocarcinoma	GAC	1	.	.	.	.	.	.	.	NA
DOID:3328	Temporal_Lobe_Epilepsy	TLE	10	DOID:2234	Focal_Epilepsy	FEpi	12	-1.81439	.	YES	-5.78805	7.12e-09	Smaller	***	1.25e-05
DOID:3328	Temporal_Lobe_Epilepsy	TLE	10	DOID:769	NeuroBlastoma	NB	8	-0.340278	.	YES	-0.579096	0.562524	Smaller	.	0.491364
DOID:3328	Temporal_Lobe_Epilepsy	TLE	10	DOID:2621	Autonomic_Nervous_System_Neoplasm	ANSN	8	-0.340278	.	YES	-0.577201	0.563804	Smaller	.	0.491364
DOID:3328	Temporal_Lobe_Epilepsy	TLE	10	DOID:1192	Peripheral_Nervous_System_Neoplasm	PNSN	9	-0.266082	.	YES	-0.302692	0.762125	Smaller	.	0.611669
DOID:3328	Temporal_Lobe_Epilepsy	TLE	10	DOID:3119	Gastrointestinal_System_Cancer	GISC	50	0.63	YES	.	2.6379	0.0083421	larger	.	0.00871769
DOID:3328	Temporal_Lobe_Epilepsy	TLE	10	DOID:3070	Malignant_Glioma	MG	17	0.561002	YES	.	2.57513	0.0100202	larger	.	0.011173
DOID:3328	Temporal_Lobe_Epilepsy	TLE	10	DOID:10534	Stomach_Cancer	SC	102	0.545168	YES	.	1.54174	0.123138	larger	.	0.105628
DOID:3328	Temporal_Lobe_Epilepsy	TLE	10	DOID:3620	Central_Nervous_System_Cancer	CNSC	10	0.25	YES	.	1.38523	0.165983	larger	.	0.152494
DOID:3328	Temporal_Lobe_Epilepsy	TLE	10	DOID:3093	Nervous_System_Cancer	NSC	20	0.191667	YES	.	1.21399	0.224751	larger	.	0.18086
DOID:3328	Temporal_Lobe_Epilepsy	TLE	10	DOID:5517	Stomach_Carcinoma	SCA	2	0.25	YES	.	0.491553	0.623035	larger	.	0.551134
DOID:3328	Temporal_Lobe_Epilepsy	TLE	10	DOID:6270	Gastric_Cardia_Carcinoma	GCCA	0	0	.	.	0	1	larger	.	1
DOID:3328	Temporal_Lobe_Epilepsy	TLE	10	DOID:10540	Gastric_Lymphoma	GLC	0	0	.	.	0	1	larger	.	1
DOID:3328	Temporal_Lobe_Epilepsy	TLE	10	DOID:3328	Temporal_Lobe_Epilepsy	TLE	10	0	.	.	0	1	larger	.	1
DOID:3328	Temporal_Lobe_Epilepsy	TLE	10	DOID:3717	Gastric_Adenocarcinoma	GAC	1	.	.	.	.	.	.	.	NA
